# Supplementary material
Source: PubMed Central journal article supplement (PMC2697620)
Supplement: NIHMS90709-supplement-01.pdf [file NIHMS90709-supplement-01.pdf]

Type of file: figure

Label: figure 1

Filename: Supplemental figure 1.pdf

# Supplemental figure 1

## A

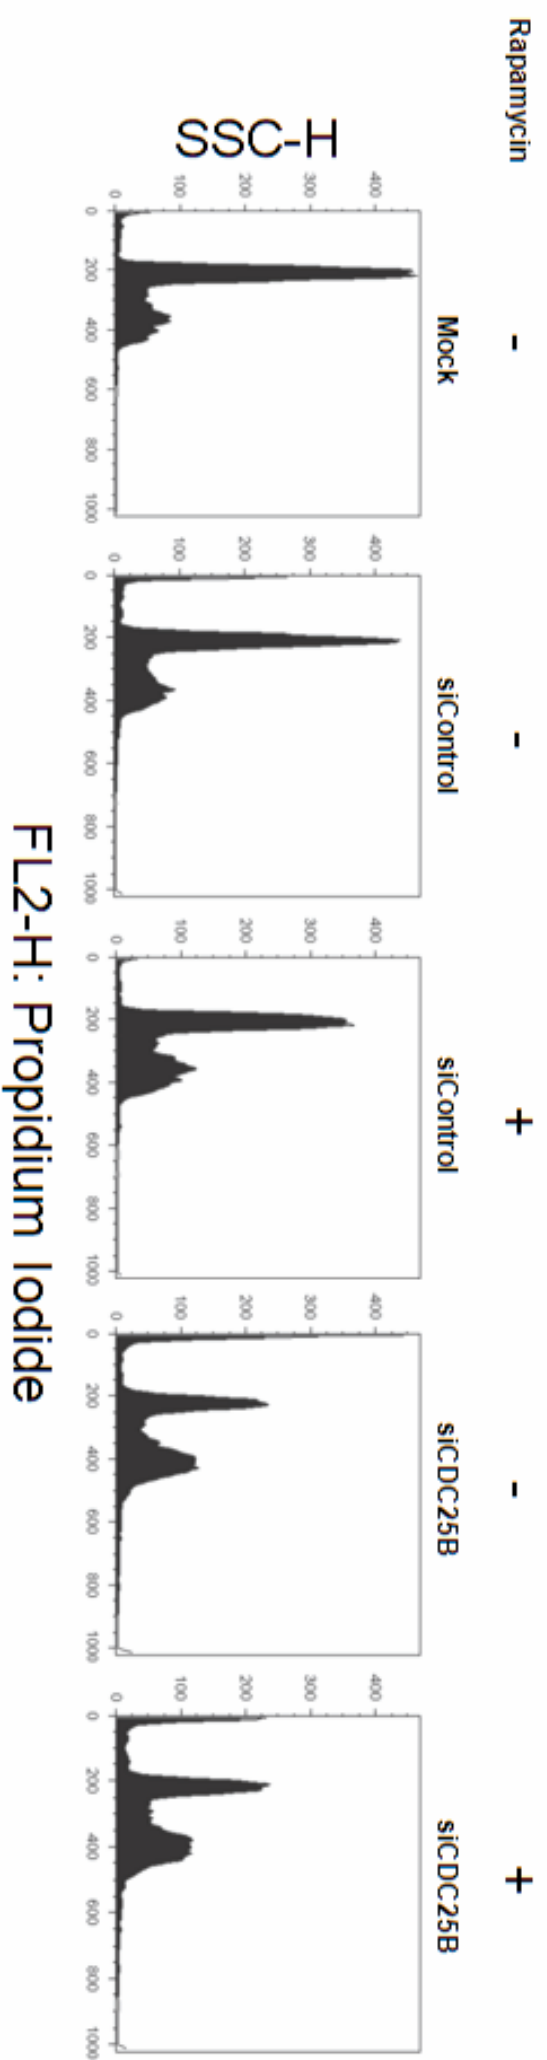

## B

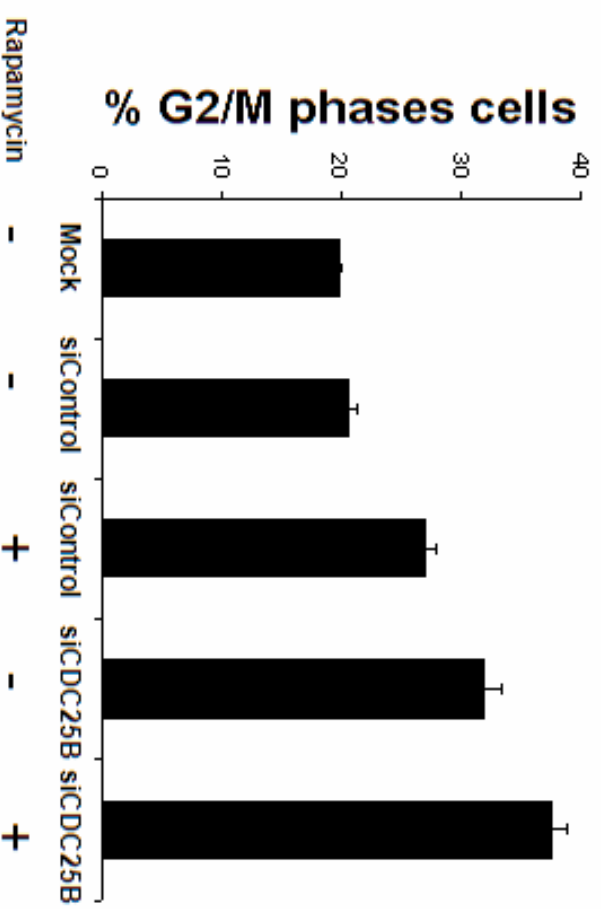

Type of file: figure

Label: figure 1 legen

Filename: Supplemental figure1 legend.pdf

## Supplemental figure legends

Figure 1. Effect of CDC25B silencing and rapamycin on Cell Cycle Progression. HeLa cells were either nontransfected (Mock) or transfected with Control siRNA (siControl) or CDC25B siRNA (siCDC25B). After 48 hr, cells were treated with 100 nM rapamycin. Cell cycle distributions were examined after 24 hr by flow cytometry. A. Representative set of histograms for transfected and control cells treated or untreated with rapamycin. B. Percentage of cells in G2/M phase. Columns, mean of at least three independent experiments.

Type of file: table

Label: table 1

Filename: Supplemental Table 1.pdf

| IPI           | GeneID | Official Syr | Sequence  | p-value     | R-square | Site  | R-ratio |
|---------------|--------|--------------|-----------|-------------|----------|-------|---------|
| IPI00000436.1 | 64405  | CDH22        | R.LLEPES  | 5.38E-08    | 0.61     | S152  | 0.2     |
| IPI00000634.1 | 8030   | CCDC6        | R.ILQEKLI | 0.253322457 | 0.96     | S240  | 1.07    |
| IPI00000634.1 | 8030   | CCDC6        | K.SGGIVIS | 0.12765804  | 0.98     | S52   | 1.15    |
| IPI00000634.1 | 8030   | CCDC6        | K.S*GGIVI | 0.096924105 | 1        | S46   | 1.22    |
| IPI00000634.1 | 8030   | CCDC6        | R.TVS*SPI | 0.197661257 | 0.88     | S351  | 1.19    |
| IPI00000634.1 | 8030   | CCDC6        | K.LDQPVS  | 0.12765804  | 1        | S240  | 1.2     |
| IPI00000685.1 | 1022   | CDK7         | R.AYT*HQ  | 0.401648339 | 0.9      | T170  | 1.13    |
| IPI00000687.1 | 10140  | TOB1         | R.TS*PINL | 0.096924105 | 0.71     | S205  | 1.04    |
| IPI00000706.3 | 747    | DAGLA        | R.GS*PSLI | 0.001432711 | 0.92     | S806  | 1.74    |
| IPI00000728.3 | 9958   | USP15        | R.GPS*TP  | 0.296993866 | 1        | S225  | 1.11    |
| IPI00000728.3 | 9958   | USP15        | R.GPST*P  | 0.296993866 | 1        | T226  | 1.11    |
| IPI00000769.2 | 3835   | KIF22        | R.ARGPEE  | 0.094770849 | 0.77     | S412  | 0.84    |
| IPI00000769.2 | 3835   | KIF22        | K.AVVMPL  | 0.342305379 | 0.83     | S543  | 0.76    |
| IPI00000811.2 | 5694   | PSMB6        | R.QS*FAIG | 2.38E-08    | 0.85     | S158  | 0.44    |
| IPI00000856.7 | 10979  | PLEKHC1      | R.AKDQNE  | 0.0002914   | 0.67     | S666  | 0.72    |
| IPI00000858.1 | 7936   | RDBP         | R.KGNTLY  | 6.68E-07    | 0.5      | T274  | 1.35    |
| IPI00000858.1 | 7936   | RDBP         | R.KGNTLY  | 0.394935546 | 0.92     | T272  | 1.07    |
| IPI00000858.1 | 7936   | RDBP         | K.S*LYESF | 0.643675939 | 0.92     | S131  | 0.83    |
| IPI00000858.1 | 7936   | RDBP         | K.SVWGS   | 0.346340474 | 0.98     | S353  | 1.08    |
| IPI00000858.1 | 7936   | RDBP         | R.S*LSEQL | 0.080258071 | 0.92     | S49   | 1.49    |
| IPI00000858.1 | 7936   | RDBP         | R.SLS*EQL | 0.080258071 | 0.92     | S51   | 1.49    |
| IPI00000897.1 | 9931   | HELZ         | R.RISS*SS | 0.643675939 | 0.92     | S1764 | 1.1     |
| IPI00000977.1 | 4296   | MAP3K11      | K.T*PDSPI | 0.233505398 | 0.5      | T702  | 0.67    |
| IPI00001053.4 | 25974  | MMACHC       | R.ARS*WL  | 0.530774648 | 0.88     | S268  | 1.22    |
| IPI00001466.2 | 27436  | EML4         | R.AS*PSP  | 0.51496205  | 0.71     | S144  | 0.78    |
| IPI00001600.1 | 79447  | C16orf53     | K.VLS*DM  | 0.214968943 | 0.9      | S206  | 1.02    |
| IPI00001722.1 | 4913   | NTHL1        | R.VAY*EG  | 0.152571688 | 0.81     | Y68   | 1.04    |
| IPI00001722.1 | 4913   | NTHL1        | R.VAYEGS  | 0.139636808 | 0.96     | S71   | 1.06    |
| IPI00001722.1 | 4913   | NTHL1        | R.VAYEGS  | 0.000485008 | 0.59     | S73   | 1.04    |
| IPI00001730.2 | 29109  | FHOD1        | K.EPLIPAS | 0.604563646 | 0.96     | S523  | 1.02    |
| IPI00001730.2 | 29109  | FHOD1        | R.TPQS*P  | 0.214968943 | 1        | S498  | 1.17    |
| IPI00001735.4 | 9612   | NCOR2        | R.SLGYHC  | 0.726073545 | 0.96     | S2068 | 0.97    |
| IPI00001735.4 | 9612   | NCOR2        | R.SLGYHC  | 0.868109485 | 0.96     | T2072 | 0.95    |
| IPI00001735.4 | 9612   | NCOR2        | R.DYASHL  | 0.116581414 | 0.86     | S54   | 1.08    |
| IPI00001735.4 | 9612   | NCOR2        | R.SLGYHC  | 0.49616549  | 0.98     | S2056 | 1.02    |
| IPI00001735.4 | 9612   | NCOR2        | R.SLGYHC  | 0.49616549  | 0.98     | S2056 | 1.02    |
| IPI00001735.4 | 9612   | NCOR2        | R.SLGYHC  | 0.643675939 | 0.98     | S2064 | 0.97    |
| IPI00001735.4 | 9612   | NCOR2        | R.SLGYHC  | 0.566916624 | 0.98     | S2064 | 0.97    |
| IPI00001735.4 | 9612   | NCOR2        | R.LLS*PRF | 0.684201094 | 0.98     | S939  | 0.95    |
| IPI00001735.4 | 9612   | NCOR2        | R.SLGYHC  | 0.566916624 | 0.98     | S2056 | 1.02    |
| IPI00001735.4 | 9612   | NCOR2        | R.ANAS*P  | 0.253322457 | 1        | S956  | 1.13    |
| IPI00001735.4 | 9612   | NCOR2        | R.SLGYHC  | 0.463105648 | 1        | S2067 | 1.06    |
| IPI00001735.4 | 9612   | NCOR2        | R.SLGYHC  | 0.463105648 | 1        | S2064 | 1.05    |
| IPI00001735.4 | 9612   | NCOR2        | R.SLGYHC  | 0.401648339 | 1        | S2067 | 1.05    |
| IPI00001735.4 | 9612   | NCOR2        | K.S*PGNT  | 0.49616549  | 1        | S2268 | 1.08    |
| IPI00001738.4 | 4927   | NUP88        | K.NQSPT*  | 0.394935546 | 0.71     | T37   | 0.65    |
| IPI00001738.4 | 4927   | NUP88        | K.NQS*PT  | 0.181528891 | 0.92     | S35   | 1.21    |
| IPI00001738.4 | 4927   | NUP88        | K.NQS*PT  | 0.197661257 | 1        | S35   | 1.18    |
| IPI00001738.4 | 4927   | NUP88        | K.NQSPT   | 0.197661257 | 1        | S45   | 1.18    |
| IPI00001786.3 | 57602  | USP36        | K.LKS*PVL | 0.684201094 | 0.96     | S667  | 0.97    |

|               |                 |           |             |      |      |      |
|---------------|-----------------|-----------|-------------|------|------|------|
| IPI00001813.4 | 57661 KIAA1542  | R.KENPS*  | 1.77E-11    | 0.92 | S814 | 3.74 |
| IPI00001813.4 | 57661 KIAA1542  | R.TVTCVT  | 0.905247537 | 0.88 | S973 | 0.91 |
| IPI00001835.3 | 57659 ZBTB4     | R.AFHGIS' | 0.391052876 | 0.83 | S391 | 0.83 |
| IPI00002186.3 | 10564 ARFGEF2   | R.GSS*LS\ | 0.152571688 | 0.98 | S277 | 0.84 |
| IPI00002232.2 | 57551 TAOK1     | R.ASDPQ   | 0.231191204 | 0.85 | S421 | 1.05 |
| IPI00002232.2 | 57551 TAOK1     | R.AGS*LKI | 0.684201094 | 0.92 | S9   | 0.99 |
| IPI00002349.2 | 57532 NUFIP2    | K.TIQNSS\ | 0.730331964 | 0.98 | S376 | 1.03 |
| IPI00002349.2 | 57532 NUFIP2    | K.TIQNSS\ | 0.730331964 | 0.98 | T378 | 1.03 |
| IPI00002349.2 | 57532 NUFIP2    | K.DYEIES\ | 0.604563646 | 0.96 | T633 | 0.99 |
| IPI00002349.2 | 57532 NUFIP2    | R.TS*PQV  | 0.253322457 | 1    | S572 | 1.1  |
| IPI00002349.2 | 57532 NUFIP2    | K.RTS*PQ' | 0.346340474 | 1    | S572 | 1.1  |
| IPI00002349.2 | 57532 NUFIP2    | K.DYEIES\ | 0.684201094 | 1    | S629 | 0.98 |
| IPI00002374.2 | 79648 MCPH1     | K.YRLS*P\ | 0.751811379 | 1    | S333 | 1.01 |
| IPI00002374.2 | 79648 MCPH1     | K.YRLSPT  | 0.684201094 | 1    | T335 | 1.08 |
| IPI00002449.1 | 5144 PDE4D      | R.RES*FL\ | 0.006469654 | 0.96 | S190 | 1.26 |
| IPI00002449.1 | 5144 PDE4D      | -.MEAEGS  | 0.431601138 | 0.81 | T25  | 0.93 |
| IPI00002564.3 | 7515 XRCC1      | R.INKT*SP | 0.49616549  | 0.88 | T198 | 1.09 |
| IPI00002564.3 | 7515 XRCC1      | R.AIGST*S | 0.214968943 | 0.96 | T235 | 1.07 |
| IPI00002564.3 | 7515 XRCC1      | R.AIGSTSI | 0.214968943 | 0.96 | S241 | 1.07 |
| IPI00002564.3 | 7515 XRCC1      | R.INKTSP\ | 0.401648339 | 0.98 | Y211 | 1.08 |
| IPI00002564.3 | 7515 XRCC1      | K.TKPTQA  | 0.373234869 | 0.98 | S446 | 1.09 |
| IPI00002564.3 | 7515 XRCC1      | R.INKTS*P | 0.530774648 | 1    | S199 | 1.02 |
| IPI00002564.3 | 7515 XRCC1      | K.TKPTQA  | 0.401648339 | 1    | S447 | 1.04 |
| IPI00002564.3 | 7515 XRCC1      | R.INKTS*P | 0.49616549  | 0.98 | S199 | 1.15 |
| IPI00002569.2 | 1978 EIF4EBP1   | R.RVVLGC  | 0.836096036 | 0.94 | T36  | 0.89 |
| IPI00002569.2 | 1978 EIF4EBP1   | R.DLPTIPC | 0.106353987 | 0.96 | S83  | 1.11 |
| IPI00002569.2 | 1978 EIF4EBP1   | R.DLPTIPC | 0.096924105 | 0.94 | S85  | 1.04 |
| IPI00002569.2 | 1978 EIF4EBP1   | R.DLPTIPC | 0.096924105 | 0.94 | S83  | 1.04 |
| IPI00002569.2 | 1978 EIF4EBP1   | R.RVVLGC  | 0.74749082  | 0.5  | T37  | 0.68 |
| IPI00002569.2 | 1978 EIF4EBP1   | R.RVVLGC  | 0.684201094 | 0    | T37  | 0.01 |
| IPI00002569.2 | 1978 EIF4EBP1   | R.DLPTIPC | 0.214968943 | 1    | S94  | 1.16 |
| IPI00002569.2 | 1978 EIF4EBP1   | R.RVVLGC  | 0.566916624 | 0.94 | T41  | 0.95 |
| IPI00002569.2 | 1978 EIF4EBP1   | K.FLMECR  | 0.74749082  | 1    | S65  | 0.97 |
| IPI00002569.2 | 1978 EIF4EBP1   | R.RVVLGC  | 0.777986561 | 0.98 | T41  | 0.96 |
| IPI00002569.2 | 1978 EIF4EBP1   | R.RVVLGC  | 0.684201094 | 0.98 | Y34  | 0.99 |
| IPI00002569.2 | 1978 EIF4EBP1   | R.RVVLGC  | 0.604563646 | 0.3  | S35  | 0.61 |
| IPI00002569.2 | 1978 EIF4EBP1   | R.DLPTIPC | 0.106353987 | 1    | S101 | 1.24 |
| IPI00002569.2 | 1978 EIF4EBP1   | R.RVVLGC  | 0.643675939 | 1    | T37  | 0.99 |
| IPI00002828.2 | 79682 MLF1IP    | K.HCGLSL  | 0.49616549  | 0.92 | S97  | 1.11 |
| IPI00002828.2 | 79682 MLF1IP    | K.HCGLSL  | 0.566916624 | 0.96 | T98  | 1.09 |
| IPI00002879.3 | 79697 C14orf169 | R.EPYGHL  | 0.49616549  | 0.66 | S109 | 0.85 |
| IPI00002902.5 | 79707 NOL9      | R.LAAFAD  | 0.730331964 | 0.92 | S487 | 1.05 |
| IPI00002902.5 | 79707 NOL9      | R.LAAFAD  | 0.839313928 | 0.96 | T492 | 0.81 |
| IPI00003337.4 | 8187 ZNF239     | K.ILNTS*P | 7.77E-06    | 0.79 | S191 | 0.38 |
| IPI00003362.2 | 3309 HSPA5      | K.DAGT*IA | 0           | 0.64 | T190 | 7.43 |
| IPI00003369.1 | 8994 LIMD1      | R.T*PSVS/ | 0.829549043 | 0.92 | T294 | 0.97 |
| IPI00003369.1 | 8994 LIMD1      | K.LS*PTSL | 0.401648339 | 0.96 | S384 | 1.11 |
| IPI00003369.1 | 8994 LIMD1      | K.LSPTS*L | 0.401648339 | 0.96 | S387 | 1.11 |
| IPI00003369.1 | 8994 LIMD1      | R.SNS*GL\ | 0.152571688 | 0.96 | S316 | 1.37 |
| IPI00003419.1 | 10944 C11orf58  | K.RS*ASPI | 0.530774648 | 0.88 | S15  | 0.86 |
| IPI00003419.1 | 10944 C11orf58  | K.RSAS*PI | 0.530774648 | 0.92 | S17  | 1.18 |

|               |                 |            |             |            |      |
|---------------|-----------------|------------|-------------|------------|------|
| IPI00003419.1 | 10944 C11orf58  | R.S*ASPD   | 0.03637398  | 0.96 S15   | 1.37 |
| IPI00003479.2 | 5594 MAPK1      | R.VADPDF   | 0.463105648 | 0.94 Y187  | 1.19 |
| IPI00003479.2 | 5594 MAPK1      | R.VADPDF   | 0.096924105 | 0.94 T185  | 1.19 |
| IPI00003479.2 | 5594 MAPK1      | R.VADPDF   | 0.166517367 | 0.4 T185   | 0.4  |
| IPI00003519.1 | 9343 EFTUD2     | K.YYPTAE   | 0.044561326 | 0.62 T90   | 1.27 |
| IPI00003519.1 | 9343 EFTUD2     | K.YYPTAE   | 0.044561326 | 0.62 T86   | 1.27 |
| IPI00003527.4 | 9368 SLC9A3R1   | R.EALAEA   | 0.401648339 | 0.98 S280  | 1.02 |
| IPI00003783.1 | 5605 MAP2K2     | K.ELEAIFC  | 0.002042313 | 0.58 S293  | 0.91 |
| IPI00003783.1 | 5605 MAP2K2     | K.ELEAIFC  | 0.002042313 | 0.58 S295  | 0.91 |
| IPI00004065.2 | 420 ART4        | K.ILLPTT*\ | 0.000254984 | 0.98 T16   | 0.51 |
| IPI00004069.1 | 9797 TATDN2     | R.GFLSSC   | 0.27446972  | 0.83 S115  | 1.05 |
| IPI00004208.4 |                 | R.GWVWS    | 4.13E-10    | 0.96 S75   | 0.31 |
| IPI00004237.1 | 5256 PHKA2      | R.RFS*AD   | 0.32093792  | 0.92 S1015 | 1.03 |
| IPI00004273.6 | 58517 RBM25     | K.LGASNS   | 0.233505398 | 0.98 S677  | 1.2  |
| IPI00004958.2 | 63894 C14orf133 | R.TRPGS*   | 0.346340474 | 0.88 S121  | 1.28 |
| IPI00004958.2 | 63894 C14orf133 | R.TRPGSF   | 0.03637398  | 1 S124     | 1.37 |
| IPI00005036.1 | 10181 RBM5      | R.GLVAAY   | 0.743182508 | 0.92 S624  | 0.97 |
| IPI00005036.1 | 10181 RBM5      | R.GLVAAY   | 0.373234869 | 0.96 S624  | 1.07 |
| IPI00005132.3 | 54552 GNL3L     | K.LLHS*PM  | 0.577359743 | 0.94 S465  | 0.95 |
| IPI00005154.1 | 6749 SSRP1      | K.EGMNPS   | 0.346340474 | 1 S444     | 1.1  |
| IPI00005154.1 | 6749 SSRP1      | K.EGMNPS   | 0.373234869 | 1 Y441     | 1.1  |
| IPI00005180.2 | 731247 hCG_1998 | R.RALVDT   | 0           | 0.83 Y107  | 7.24 |
| IPI00005477.3 | 221830 TWISTNB  | R.KHS*EE   | 0.431601138 | 0.85 S316  | 0.92 |
| IPI00005477.3 | 221830 TWISTNB  | R.KHSEEA   | 0.017448313 | 0.83 S328  | 1.13 |
| IPI00005477.3 | 221830 TWISTNB  | R.HIALS*P  | 0.080258071 | 1 S60      | 1.29 |
| IPI00005477.3 | 221830 TWISTNB  | R.KHS*EE   | 0.431601138 | 0.98 S316  | 1.09 |
| IPI00005477.3 | 221830 TWISTNB  | K.HSEEA    | 0.03637398  | 1 S328     | 1.32 |
| IPI00005477.3 | 221830 TWISTNB  | K.HSEEA    | 0.024009318 | 1 T322     | 1.32 |
| IPI00005477.3 | 221830 TWISTNB  | K.HQEVQI   | 0.27446972  | 0.98 S300  | 1.17 |
| IPI00005477.3 | 221830 TWISTNB  | K.HQEVQI   | 0.27446972  | 0.98 S304  | 1.17 |
| IPI00005477.3 | 221830 TWISTNB  | R.KHS*EE   | 0.84064003  | 1 S316     | 0.98 |
| IPI00005614.5 | 6711 SPTBN1     | R.AQTLPT   | 0.32093792  | 0.94 S2340 | 1.18 |
| IPI00005614.5 | 6711 SPTBN1     | R.AQTLPT   | 0.32093792  | 0.98 S2341 | 1.2  |
| IPI00005614.5 | 6711 SPTBN1     | R.AQTLPT   | 0.32093792  | 0.98 T2337 | 1.2  |
| IPI00005621.1 | 85360 SYDE1     | R.VPVGEY   | 0.726073545 | 1 S442     | 1    |
| IPI00005675.3 | 55922 NKRF      | R.FEPVHF   | 0.708392237 | 0.9 S65    | 1.1  |
| IPI00005675.3 | 55922 NKRF      | R.FEPVHF   | 0.708392237 | 0.9 S67    | 1.1  |
| IPI00005717.1 | 2101 ESRRA      | K.AEPAS*I  | 0.703604632 | 0.86 S116  | 0.99 |
| IPI00005822.1 | 8697 CDC23      | R.NQGETF   | 0.001128958 | 0.72 S578  | 1.1  |
| IPI00006077.1 | 9767 PHF16      | R.NSSTET   | 0.431601138 | 0.98 S566  | 1.06 |
| IPI00006077.1 | 9767 PHF16      | K.GVQVPA   | 0.214968943 | 0.98 S85   | 1.09 |
| IPI00006091.2 | 1756 DMD        | K.GLSPLP   | 0.197661257 | 0.76 S1076 | 1.05 |
| IPI00006091.2 | 1756 DMD        | K.GLSPLP   | 0.197661257 | 0.76 S3552 | 1.05 |
| IPI00006091.2 | 1756 DMD        | R.MGYLPA   | 0.296993866 | 0.92 S962  | 0.98 |
| IPI00006091.2 | 1756 DMD        | K.VNGTTV   | 0.917421569 | 0.88 S1140 | 1.02 |
| IPI00006099.1 | 9790 BMS1       | K.LGPQNF   | 0.147475653 | 0.69 T638  | 0.77 |
| IPI00006099.1 | 9790 BMS1       | K.LGPQNF   | 0.995403769 | 0.94 S639  | 0.92 |
| IPI00006213.1 | 5108 PCM1       | R.RQGLAE   | 0.604563646 | 0.88 S861  | 0.94 |
| IPI00006213.1 | 5108 PCM1       | R.RQGLAE   | 0.604563646 | 0.88 T859  | 0.94 |
| IPI00006283.3 | 9344 TAOK2      | R.AAS*GG   | 0.566916624 | 0.94 S1011 | 1.1  |
| IPI00006283.3 | 9344 TAOK2      | R.AASGG    | 0.566916624 | 0.94 S1014 | 1.1  |



|               |                 |           |             |      |       |      |
|---------------|-----------------|-----------|-------------|------|-------|------|
| IPI00006283.3 | 9344 TAOK2      | R.LPGSDN  | 0.684201094 | 0.67 | S452  | 0.73 |
| IPI00006379.1 | 51602 NOP5/NOFK | LNLSCIF   | 0.545847833 | 0.85 | S109  | 1.06 |
| IPI00006379.1 | 51602 NOP5/NOFK | HIKEEPL   | 0.040276449 | 0.88 | S502  | 1.1  |
| IPI00006379.1 | 51602 NOP5/NOFK | HIKEEPL   | 0.181528891 | 0.96 | S502  | 1.17 |
| IPI00006379.1 | 51602 NOP5/NOFK | HIKEEPL   | 0.586469457 | 0.96 | S502  | 1.17 |
| IPI00006408.3 | 51070 NOSIP     | K.VLPSFW  | 0.684201094 | 0.98 | T168  | 1.08 |
| IPI00006471.3 | 9833 MELK       | K.LMTGVI  | 0.296993866 | 0.98 | S498  | 1.1  |
| IPI00006557.7 | 9867 PJA2       | K.NHGSS*  | 0.881970624 | 0.72 | S309  | 0.97 |
| IPI00006571.1 | 81550 TDRD3     | R.IRS*EDE | 0.536956757 | 0.86 | S256  | 0.96 |
| IPI00006586.1 | 9878 TOX4       | R.LSTTPS  | 0.713185935 | 0.72 | S178  | 0.6  |
| IPI00006900.1 | 57050 SAS10     | K.AGPTLT  | 0.431601138 | 0.85 | S37   | 1.1  |
| IPI00006987.1 | 57062 DDX24     | R.SPGKAE  | 0.717985529 | 0.83 | S295  | 0.74 |
| IPI00006987.1 | 57062 DDX24     | R.S*PGKA  | 0.917421569 | 0.98 | S287  | 0.88 |
| IPI00006987.1 | 57062 DDX24     | R.S*PGKA  | 0.604563646 | 0.98 | S287  | 0.99 |
| IPI00007004.4 | 51018 RRP15     | K.T*PESKI | 0.530774648 | 1    | T104  | 1.01 |
| IPI00007080.1 | 3623 INHA       | R.S*T*PLM | 0           | 0.94 | S233  | 0.05 |
| IPI00007208.4 | 51428 DDX41     | R.TDEVPA  | 0.643675939 | 0.81 | S21   | 0.99 |
| IPI00007208.4 | 51428 DDX41     | R.TDEVPA  | 0.152571688 | 0.96 | S23   | 1.13 |
| IPI00007208.4 | 51428 DDX41     | R.TDEVPA  | 0.152571688 | 0.96 | S21   | 1.13 |
| IPI00007264.1 | 26353 HSPB8     | R.DPFRDS  | 0.970843959 | 0.92 | S24   | 0.92 |
| IPI00007277.1 | 9209 LRRFIP2    | R.RGS*GC  | 0.049260986 | 0.96 | S328  | 1.12 |
| IPI00007334.1 | 22985 ACIN1     | K.EAS*S*F | 0.181528891 | 0.85 | S424  | 1.04 |
| IPI00007334.1 | 22985 ACIN1     | K.SLIPDIK | 0.296993866 | 0.81 | S895  | 0.87 |
| IPI00007334.1 | 22985 ACIN1     | K.SLIPDIK | 0.214968943 | 0.81 | S898  | 0.87 |
| IPI00007334.1 | 22985 ACIN1     | K.AES*PAI | 0.197661257 | 0.85 | S490  | 1.01 |
| IPI00007334.1 | 22985 ACIN1     | K.ASLVALI | 0.566916624 | 0.92 | S410  | 0.89 |
| IPI00007334.1 | 22985 ACIN1     | R.TAQVPS  | 0.233505398 | 0.96 | S1004 | 1.17 |
| IPI00007334.1 | 22985 ACIN1     | K.EAS*SPI | 0.373234869 | 0.92 | S424  | 1.1  |
| IPI00007334.1 | 22985 ACIN1     | K.EASS*PI | 0.743182508 | 0.92 | S425  | 1.01 |
| IPI00007334.1 | 22985 ACIN1     | K.EAS*SPI | 0.643675939 | 0.92 | S424  | 1.01 |
| IPI00007343.1 | 7737 RNF113A    | K.AAY*GD  | 0.684201094 | 0.85 | Y80   | 1.07 |
| IPI00007343.1 | 7737 RNF113A    | K.AAYGDL  | 0.684201094 | 0.85 | S84   | 1.07 |
| IPI00007343.1 | 7737 RNF113A    | R.YGVYEC  | 0.738886535 | 0.9  | S253  | 0.97 |
| IPI00007411.1 | 11215 AKAP11    | R.VTYAEK  | 0.197661257 | 1    | S1580 | 0.96 |
| IPI00007411.1 | 11215 AKAP11    | R.VTYAEK  | 0.080258071 | 1    | T1583 | 0.96 |
| IPI00007411.1 | 11215 AKAP11    | R.NVIPDTI | 1.29E-05    | 0.5  | T1104 | 0.97 |
| IPI00007525.1 | 4197 MDS1       | K.EGSPY*  | 0.577359743 | 0.9  | Y64   | 0.94 |
| IPI00007675.5 | 51143 DYNC1LI1  | R.SVSSNV  | 0.346340474 | 0.98 | S421  | 0.99 |
| IPI00007675.5 | 51143 DYNC1LI1  | R.NTASQE  | 0.267585708 | 0.83 | T231  | 0.89 |
| IPI00007675.5 | 51143 DYNC1LI1  | R.NTASQE  | 0.267585708 | 0.83 | S222  | 0.89 |
| IPI00007675.5 | 51143 DYNC1LI1  | K.KT*GSP  | 0.214968943 | 0.69 | T456  | 0.85 |
| IPI00007935.3 | 10611 PDLIM5    | K.KANNSC  | 0.684201094 | 0.81 | S313  | 1.06 |
| IPI00007935.3 | 10611 PDLIM5    | K.EVVKPV  | 0.791231585 | 0.98 | T110  | 0.99 |
| IPI00007935.3 | 10611 PDLIM5    | K.EVVKPV  | 0.684201094 | 1    | S111  | 1    |
| IPI00008054.2 | 27154 BRPF3     | R.RTS*VLF | 0.03282354  | 0.94 | S928  | 1.12 |
| IPI00008054.2 | 27154 BRPF3     | R.GTHLPE  | 0.273956116 | 0.62 | S713  | 0.7  |
| IPI00008137.1 | 49854 ZNF295    | K.IQPLEPI | 0.643675939 | 0.98 | S1003 | 0.98 |
| IPI00008137.1 | 49854 ZNF295    | R.SLS*MD  | 0.438828959 | 0.77 | S345  | 0.98 |
| IPI00008137.1 | 49854 ZNF295    | R.S*LSMD  | 0.438828959 | 0.77 | S343  | 0.98 |
| IPI00008177.3 | 57476 GRAMD1BK  | SSIETKF   | 0.49616549  | 0.94 | S274  | 1.03 |
| IPI00008177.3 | 57476 GRAMD1BK  | KSQSW     | 0.990601784 | 0.98 | S88   | 0.99 |

|               |       |                  |             |             |      |       |      |
|---------------|-------|------------------|-------------|-------------|------|-------|------|
| IPI00008177.3 | 57476 | GRAMD1BK.SSIETKF | 0.32093792  | 0.98        | S274 | 1.15  |      |
| IPI00008177.3 | 57476 | GRAMD1BK.TESTYL  | 0.001938901 | 0.76        | S550 | 0.36  |      |
| IPI00008274.5 | 10487 | CAP1             | K.ELS*GLF   | 0.197661257 | 0.83 | S218  | 1.17 |
| IPI00008283.2 | 64397 | ZFP106           | R.NRENS*    | 0.431601138 | 0.96 | S1279 | 0.93 |
| IPI00008283.2 | 64397 | ZFP106           | R.NRENSF    | 0.463105648 | 1    | S1281 | 1.07 |
| IPI00008283.2 | 64397 | ZFP106           | R.AAHVPE    | 0.253322457 | 0.98 | T1372 | 1.17 |
| IPI00008283.2 | 64397 | ZFP106           | R.AAHVPE    | 0.253322457 | 0.98 | T1378 | 1.17 |
| IPI00008283.2 | 64397 | ZFP106           | R.AAHVPE    | 0.32093792  | 0.98 | S1370 | 1.05 |
| IPI00008283.2 | 64397 | ZFP106           | R.LSFASE    | 0.049260986 | 0.9  | S1328 | 0.86 |
| IPI00008529.1 | 6181  | RPLP2            | K.KEES*EI   | 0.096924105 | 0.74 | S102  | 0.97 |
| IPI00008531.1 | 23186 | RCOR1            | R.RS*QER    | 0.401648339 | 0.96 | S124  | 1.19 |
| IPI00008616.1 | 10723 | SLC12A7          | R.TQAPPT    | 0.431601138 | 0.92 | T973  | 1.1  |
| IPI00008631.2 | 10744 | PTTG2            | K.LFQLGP    | 0.27446972  | 0.9  | S165  | 1.21 |
| IPI00008845.3 | 51193 | ZNF639           | R.NQNYLV    | 0.166517367 | 0.9  | S88   | 1.22 |
| IPI00008961.1 | 54386 | TERF2IP          | K.ENARS*    | 0.684201094 | 0.96 | S154  | 0.93 |
| IPI00008961.1 | 54386 | TERF2IP          | K.YLLGDA    | 0.566916624 | 0.98 | S205  | 0.98 |
| IPI00008961.1 | 54386 | TERF2IP          | K.YLLGDA    | 0.566916624 | 0.98 | S203  | 0.98 |
| IPI00008998.1 | 51495 | PTPLAD1          | R.WLDES*    | 0.233505398 | 0.98 | S114  | 1.2  |
| IPI00009111.1 | 7162  | TPBG             | R.NLFLT*G   | 0.120995626 | 0.71 | T99   | 0.87 |
| IPI00009328.2 | 9775  | EIF4A3           | K.LDYGQH    | 0.49616549  | 1    | T163  | 1.13 |
| IPI00009334.4 | 25865 | PRKD2            | R.RLS*STG   | 0.026216849 | 0.85 | S197  | 1.02 |
| IPI00009334.4 | 25865 | PRKD2            | R.LSS*TSL   | 0.296993866 | 0.96 | S198  | 1.15 |
| IPI00009334.4 | 25865 | PRKD2            | R.LS*STSL   | 0.296993866 | 0.96 | S197  | 1.15 |
| IPI00009334.4 | 25865 | PRKD2            | R.S*VVG     | 0.004600913 | 0.76 | S710  | 1.24 |
| IPI00009448.1 | 7128  | TNFAIP3          | R.GEAYEF    | 0.106353987 | 0.76 | T454  | 1.32 |
| IPI00009448.1 | 7128  | TNFAIP3          | R.GEAYEF    | 0.072926818 | 1    | T454  | 1.31 |
| IPI00009448.1 | 7128  | TNFAIP3          | R.GEAYEF    | 0.040276449 | 1    | S459  | 1.32 |
| IPI00009504.1 | 6575  | SLC20A2          | R.NNSY*TI   | 0.431601138 | 0.86 | Y386  | 1.05 |
| IPI00009505.1 | 6645  | SNTB2            | K.KPSLVS    | 0.197661257 | 0.92 | S231  | 1.11 |
| IPI00009505.1 | 6645  | SNTB2            | K.KPSLVS    | 0.928728317 | 0.76 | S224  | 0.86 |
| IPI00009505.1 | 6645  | SNTB2            | K.KPSLVS    | 0.893037453 | 0.92 | S222  | 0.87 |
| IPI00009505.1 | 6645  | SNTB2            | K.KPSLVS    | 0.970843959 | 0.92 | S222  | 0.87 |
| IPI00009505.1 | 6645  | SNTB2            | R.S*PSLG    | 0.214968943 | 0.72 | S393  | 1.21 |
| IPI00009505.1 | 6645  | SNTB2            | R.SPS*LG    | 0.214968943 | 0.72 | S395  | 1.21 |
| IPI00009505.1 | 6645  | SNTB2            | R.GPAGE/    | 0.106353987 | 0.94 | S110  | 1.2  |
| IPI00009505.1 | 6645  | SNTB2            | R.LVHSGS    | 0.368149744 | 0.69 | S389  | 0.79 |
| IPI00009505.1 | 6645  | SNTB2            | K.KPSLVS    | 0.566916624 | 1    | S222  | 1.06 |
| IPI00009505.1 | 6645  | SNTB2            | K.KPSLVS    | 0.346340474 | 1    | S224  | 1.1  |
| IPI00009505.1 | 6645  | SNTB2            | K.KPSLVS    | 0.197661257 | 1    | S233  | 1.1  |
| IPI00009544.2 | 10928 | RALBP1           | R.TPSSEE    | 0.088241621 | 0.98 | S34   | 1.3  |
| IPI00009544.2 | 10928 | RALBP1           | R.T*PSSEI   | 0.088241621 | 0.98 | T27   | 1.28 |
| IPI00009544.2 | 10928 | RALBP1           | R.TGEPSP    | 0.116581414 | 0.62 | S62   | 1.25 |
| IPI00009544.2 | 10928 | RALBP1           | R.TPSSEE    | 0.096924105 | 0.98 | T36   | 1.22 |
| IPI00009544.2 | 10928 | RALBP1           | R.TPS*SEI   | 0.32093792  | 0.94 | S29   | 1.21 |
| IPI00009544.2 | 10928 | RALBP1           | R.TPSS*EI   | 0.166517367 | 0.98 | S30   | 1.25 |
| IPI00009544.2 | 10928 | RALBP1           | R.TPS*SEI   | 0.116581414 | 0.98 | S29   | 1.25 |
| IPI00009544.2 | 10928 | RALBP1           | R.TPS*SEI   | 0.233505398 | 1    | S29   | 1.16 |
| IPI00009544.2 | 10928 | RALBP1           | R.T*PSSEI   | 0.233505398 | 1    | T27   | 1.16 |
| IPI00009597.1 | 6607  | SMN2             | R.RGTGQ     | 0.49616549  | 0.77 | S28   | 1.12 |
| IPI00009597.1 | 6607  | SMN2             | R.RGTGQ     | 0.154098617 | 0.69 | S28   | 1.06 |
| IPI00009597.1 | 6607  | SMN2             | R.RGT*GC    | 0.154098617 | 0.69 | T25   | 1.06 |

|               |                |           |             |      |       |      |
|---------------|----------------|-----------|-------------|------|-------|------|
| IPI00009659.3 | 58490 C20orf77 | K.LSMEDS  | 0.166517367 | 0.05 | S134  | 0.45 |
| IPI00009659.3 | 58490 C20orf77 | K.RTFQQI  | 0.530774648 | 0.9  | S166  | 0.97 |
| IPI00009659.3 | 58490 C20orf77 | R.TFQQIQ  | 0.158622263 | 0.96 | S166  | 1.29 |
| IPI00009771.5 | 84823 LMNB2    | R.AGGPA1  | 0.684201094 | 0.36 | S37   | 0.42 |
| IPI00009771.5 | 84823 LMNB2    | R.AGGPA1  | 0.643675939 | 0.9  | T39   | 1.02 |
| IPI00009900.1 | 51307 FAM53C   | R.FSLS*P  | 0.401648339 | 0.98 | S234  | 1.04 |
| IPI00009900.1 | 51307 FAM53C   | R.SLS*VP  | 0.116581414 | 0.96 | S122  | 1.17 |
| IPI00010088.1 | 9759 HDAC4     | K.TQHSS*  | 0.214968943 | 0.9  | S210  | 1.15 |
| IPI00010088.1 | 9759 HDAC4     | R.AQS*SP  | 0.353263807 | 0.94 | S632  | 1.11 |
| IPI00010196.1 | 8204 NRIP1     | K.AGS*PI  | 0.9240167   | 0.92 | S564  | 1.19 |
| IPI00010308.1 | 728 C5AR1      | -.MNSFNY  | 0.568296053 | 0.83 | Y11   | 0.75 |
| IPI00010349.1 | 8540 AGPS      | R.RAAS*A  | 0.684201094 | 1    | S65   | 1.01 |
| IPI00010349.1 | 8540 AGPS      | R.RAASAA  | 0.000888315 | 0.86 | T68   | 0.95 |
| IPI00010368.4 | 3796 KIF2A     | R.ARPSQF  | 0.684201094 | 0.92 | S120  | 0.99 |
| IPI00010368.4 | 3796 KIF2A     | R.ARPSQF  | 0.643675939 | 0.96 | S117  | 1.01 |
| IPI00010388.1 | 1059 CENPB     | R.TPAAPA  | 0.401648339 | 1    | S156  | 1.06 |
| IPI00010428.3 | 83461 CDCA3    | R.SPS*AG  | 0.643675939 | 0.96 | S31   | 0.85 |
| IPI00010428.3 | 83461 CDCA3    | R.S*PS*AC | 0.643675939 | 0.96 | S29   | 0.85 |
| IPI00010428.3 | 83461 CDCA3    | K.HAQDSI  | 0.604563646 | 1    | S68   | 1.01 |
| IPI00010428.3 | 83461 CDCA3    | R.SPSAGII | 0.907673183 | 0.98 | T37   | 1.01 |
| IPI00010428.3 | 83461 CDCA3    | R.SPSAGII | 0.907673183 | 0.98 | T37   | 1.01 |
| IPI00010428.3 | 83461 CDCA3    | K.VLGRS*I | 0.003673579 | 0.98 | S199  | 0.91 |
| IPI00010428.3 | 83461 CDCA3    | K.VLGRS*I | 0.572822052 | 0.98 | S199  | 0.91 |
| IPI00010428.3 | 83461 CDCA3    | K.VLGRSP  | 0.9949766   | 1    | T202  | 0.91 |
| IPI00010466.2 | 5579 PRKCB1    | R.T*FCGTI | 0.684201094 | 0.9  | T500  | 0.99 |
| IPI00010466.2 | 5579 PRKCB1    | R.TFCGT*I | 0.922292588 | 0.96 | T504  | 1.08 |
| IPI00010554.2 | 10580 SORBS1   | R.RVGEQI  | 0.021601024 | 0.86 | T280  | 1.14 |
| IPI00010728.4 |                | K.DKVSDG  | 0.001272035 | 0.81 | S1534 | 1.36 |
| IPI00010728.4 |                | R.RLS*NV  | 0.627992512 | 0.76 | S1826 | 0.94 |
| IPI00010728.4 |                | R.VDHGAE  | 0.088241621 | 1    | S1813 | 1.38 |
| IPI00010746.1 | 9791 PTDSS1    | K.TYS*ECI | 0.187602579 | 0.94 | S417  | 0.77 |
| IPI00010746.1 | 9791 PTDSS1    | K.TYSECE  | 0.660822982 | 0.96 | Y424  | 1.2  |
| IPI00010746.1 | 9791 PTDSS1    | K.TYSECE  | 0.463105648 | 0.98 | S425  | 1.15 |
| IPI00010746.1 | 9791 PTDSS1    | K.T*YSECI | 0.261301769 | 0.98 | T415  | 0.78 |
| IPI00010746.1 | 9791 PTDSS1    | R.EKTY*S  | 0.902796178 | 0.88 | S417  | 0.91 |
| IPI00010833.1 | 7707 ZNF148    | R.SLKQPL  | 0.941751315 | 0.98 | S412  | 0.93 |
| IPI00010882.3 | 1676 DFFA      | R.SISASK/ | 0.000153677 | 0.76 | S315  | 0.28 |
| IPI00011069.1 | 7374 UNG       | K.TLYSFF  | 0.346340474 | 0.86 | S12   | 0.92 |
| IPI00011069.1 | 7374 UNG       | K.TLYSFF  | 0.346340474 | 0.92 | S14   | 1.04 |
| IPI00011069.1 | 7374 UNG       | K.KAPAGC  | 0.233505398 | 0.86 | T60   | 1.38 |
| IPI00011115.1 | 83855 KLF16    | R.GGPGA/  | 0.431601138 | 0.46 | S99   | 0.99 |
| IPI00011118.2 | 6241 RRM2      | K.GLSLVD  | 0.604563646 | 1    | T93   | 0.98 |
| IPI00011118.2 | 6241 RRM2      | R.VPLAPIT | 0.431601138 | 1    | S80   | 1.09 |
| IPI00011590.1 | 8061 FOSL1     | R.PLTYPQ  | 0.049260986 | 0.98 | S74   | 1.35 |
| IPI00011592.3 | 1783 DYNC1LI2  | R.GGPAS\  | 0.604563646 | 0.98 | S407  | 0.99 |
| IPI00011592.3 | 1783 DYNC1LI2  | R.GGPAS\  | 0.604563646 | 0.98 | S406  | 0.99 |
| IPI00011592.3 | 1783 DYNC1LI2  | R.GPLTSC  | 0.152571688 | 0.96 | S205  | 1.14 |
| IPI00011665.1 | 9422 ZNF264    | R.IHT*GEK | 0.050832434 | 0.94 | T422  | 0.73 |
| IPI00011689.1 | 29904 EEF2K    | K.SERYSS  | 0.060044376 | 0.96 | S74   | 1.28 |
| IPI00011689.1 | 29904 EEF2K    | K.SERYS*  | 0.060044376 | 0.96 | S70   | 1.28 |
| IPI00011689.1 | 29904 EEF2K    | R.YSSSGE  | 3.50E-07    | 0.85 | S74   | 1.93 |

|               |                |           |             |           |      |
|---------------|----------------|-----------|-------------|-----------|------|
| IPI00011689.1 | 29904 EEF2K    | R.YS*SSG  | 0.827038504 | 0.96 S70  | 1.52 |
| IPI00011689.1 | 29904 EEF2K    | K.LLQSAK  | 0.044561326 | 0.98 T348 | 1.44 |
| IPI00011735.2 | 3475 IFRD1     | R.GSS*AG  | 0.401648339 | 0.79 S15  | 0.97 |
| IPI00011735.2 | 3475 IFRD1     | R.HLYNS*  | 0.58190894  | 0.9 S427  | 0.99 |
| IPI00011857.1 | 8208 CHAF1B    | R.TQDPSS  | 0.530774648 | 0.96 S429 | 1.11 |
| IPI00011857.1 | 8208 CHAF1B    | R.GSS*PG  | 0.296993866 | 1 S410    | 1.13 |
| IPI00011857.1 | 8208 CHAF1B    | R.GSSPGF  | 0.373234869 | 1 S422    | 1.08 |
| IPI00011875.1 | 3550 IK        | K.KPPEAD  | 0.13480971  | 0.94 S328 | 0.75 |
| IPI00011875.1 | 3550 IK        | K.KPPEAD  | 0.13480971  | 0.94 T329 | 0.75 |
| IPI00011875.1 | 3550 IK        | K.KPPEAD  | 0.618694288 | 0.94 T332 | 0.75 |
| IPI00012149.1 | 10199 MPHOSP   | K.SDLRKS  | 0.032094189 | 0.77 S163 | 0.84 |
| IPI00012199.1 | 7908 CCDC86    | R.RALVEF  | 0.530774648 | 0.98 S47  | 1    |
| IPI00012199.1 | 7908 CCDC86    | R.LGGLRF  | 0.401648339 | 0.98 S18  | 1.2  |
| IPI00012199.1 | 7908 CCDC86    | R.LGGLRF  | 0.401648339 | 0.98 S18  | 1.2  |
| IPI00012199.1 | 7908 CCDC86    | R.LGGLRF  | 0.373234869 | 0.96 S18  | 1.06 |
| IPI00012199.1 | 7908 CCDC86    | R.LGGLRF  | 0.296993866 | 0.96 S21  | 1.06 |
| IPI00012199.1 | 7908 CCDC86    | R.LGGLRF  | 0.604563646 | 1 S18     | 1.05 |
| IPI00012199.1 | 7908 CCDC86    | R.LGGLRF  | 0.604563646 | 1 S18     | 1.05 |
| IPI00012199.1 | 7908 CCDC86    | R.RALVEF  | 0.868109485 | 0.98 S50  | 1.1  |
| IPI00012199.1 | 7908 CCDC86    | R.AGLGS*  | 0.214968943 | 1 S58     | 1.15 |
| IPI00012199.1 | 7908 CCDC86    | R.LQQGAC  | 0.346340474 | 0.98 S91  | 1.07 |
| IPI00012199.1 | 7908 CCDC86    | R.LQQGAC  | 0.604563646 | 1 S80     | 1.05 |
| IPI00012199.1 | 7908 CCDC86    | R.LGGLRF  | 0.401648339 | 1 S26     | 1.08 |
| IPI00012199.1 | 7908 CCDC86    | R.ALVEFE  | 0.401648339 | 1 S47     | 1.08 |
| IPI00012268.3 | 5708 PSMD2     | K.APVQPC  | 0.021601024 | 0.94 S16  | 1.18 |
| IPI00012268.3 | 5708 PSMD2     | R.DKAPVC  | 0.32093792  | 0.9 S16   | 1.11 |
| IPI00012318.3 | 4214 MAP3K1    | R.RAPS*P  | 0.296993866 | 0.96 S478 | 1.14 |
| IPI00012340.1 | 8683 SFRS9     | R.GS*PHY  | 0.401648339 | 1 S211    | 1.07 |
| IPI00012340.1 | 8683 SFRS9     | R.GS*PHY  | 0.431601138 | 1 S211    | 1.06 |
| IPI00012442.1 | 10146 G3BP1    | R.YQDEVF  | 0.253322457 | 0.98 S149 | 1.05 |
| IPI00012442.1 | 10146 G3BP1    | K.SSS*PAI | 0.233505398 | 1 S232    | 1.16 |
| IPI00012462.1 | 83939 EIF2A    | R.S*DKSP  | 0.12765804  | 0.94 S527 | 1.15 |
| IPI00012462.1 | 83939 EIF2A    | R.SDKS*P  | 0.12765804  | 0.98 S530 | 1.2  |
| IPI00012463.3 | 83940 TATDN1   | K.TEANLE  | 0.0313941   | 1 S214    | 0.65 |
| IPI00012527.3 | 7553 ZNF7      | R.ISPQDFI | 0.463105648 | 0.96 S128 | 1.14 |
| IPI00012527.3 | 7553 ZNF7      | R.ISPQDFI | 0.463105648 | 0.96 S138 | 1.14 |
| IPI00012669.1 | 56006 C19orf61 | R.AGPGSS  | 0.764845588 | 0.94 S451 | 1.04 |
| IPI00012773.1 | 9112 MTA1      | R.SNMS*P  | 0.463105648 | 1 S449    | 1.08 |
| IPI00012773.1 | 9112 MTA1      | K.SVSSVL  | 0.002581506 | 0.77 T564 | 0.95 |
| IPI00012856.1 | 2309 FOXO3     | K.GS*GLG  | 0.096924105 | 0.96 S421 | 1.27 |
| IPI00012856.1 | 2309 FOXO3     | K.GSGLGS  | 0.096924105 | 0.96 T427 | 1.27 |
| IPI00012966.1 | 6938 TCF12     | R.PGGQAI  | 0.152571688 | 0.98 S385 | 1.15 |
| IPI00012966.1 | 6938 TCF12     | R.PGGQAI  | 0.034268332 | 0.59 S386 | 0.45 |
| IPI00012966.1 | 6938 TCF12     | R.PGGQAI  | 0.12765804  | 0.98 S386 | 1.14 |
| IPI00012966.1 | 6938 TCF12     | R.PGGQAI  | 0.166517367 | 0.94 S388 | 1.12 |
| IPI00012966.1 | 6938 TCF12     | K.TRPTTL  | 0           | 0.88 S44  | 0.34 |
| IPI00012966.1 | 6938 TCF12     | K.TRPTTL  | 0           | 0.88 S49  | 0.34 |
| IPI00012966.1 | 6938 TCF12     | K.TRPTTL  | 0           | 0.88 S43  | 0.34 |
| IPI00012966.1 | 6938 TCF12     | R.PGGQAI  | 0.181528891 | 1 S392    | 1.19 |
| IPI00013068.1 | 3646 EIF3S6    | K.LGHVVM  | 0.643675939 | 1 S399    | 0.97 |
| IPI00013068.1 | 3646 EIF3S6    | K.LGHVVM  | 0.643675939 | 1 Y401    | 0.97 |

|               |        |          |           |             |      |       |      |
|---------------|--------|----------|-----------|-------------|------|-------|------|
| IPI00013174.2 | 84972  | TMEM137  | R.TQSS*A  | 0.84419767  | 0.98 | S521  | 0.97 |
| IPI00013174.2 | 84972  | TMEM137  | R.YS*GSY  | 0.139636808 | 0.94 | S649  | 0.96 |
| IPI00013174.2 | 84972  | TMEM137  | R.TRLS*PF | 0.463105648 | 0.98 | S582  | 1.06 |
| IPI00013174.2 | 84972  | TMEM137  | R.RLS*ES  | 0.052879882 | 1    | S618  | 0.66 |
| IPI00013174.2 | 84972  | TMEM137  | R.QPT*PP  | 0.373234869 | 1    | T206  | 1.1  |
| IPI00013214.1 | 4172   | MCM3     | R.RYSDLT  | 0.011294655 | 0.67 | T163  | 1.13 |
| IPI00013214.1 | 4172   | MCM3     | R.RYS*DL  | 0.296993866 | 0.96 | S160  | 1.08 |
| IPI00013214.1 | 4172   | MCM3     | R.RY*SDL  | 0.166517367 | 0.96 | Y159  | 1.16 |
| IPI00013214.1 | 4172   | MCM3     | R.RYSDLT  | 0.27446972  | 0.98 | T164  | 1.09 |
| IPI00013214.1 | 4172   | MCM3     | R.RY*SDL  | 0.27446972  | 0.98 | Y159  | 1.09 |
| IPI00013214.1 | 4172   | MCM3     | R.RYS*DL  | 0.296993866 | 0.96 | S160  | 1.11 |
| IPI00013214.1 | 4172   | MCM3     | K.DGDSYL  | 0.431601138 | 0.96 | S711  | 1.06 |
| IPI00013214.1 | 4172   | MCM3     | K.DGDSYL  | 0.431601138 | 0.96 | T713  | 1.06 |
| IPI00013214.1 | 4172   | MCM3     | K.DGDSYL  | 0.373234869 | 1    | S711  | 1.04 |
| IPI00013214.1 | 4172   | MCM3     | R.RYSDLT  | 0.12765804  | 0.98 | T164  | 1.17 |
| IPI00013215.2 | 4998   | ORC1L    | K.LQTLS*F | 0.253322457 | 0.98 | S287  | 1.04 |
| IPI00013215.2 | 4998   | ORC1L    | R.SQPDKL  | 0.317438906 | 0.98 | S287  | 0.91 |
| IPI00013215.2 | 4998   | ORC1L    | K.SAES*P  | 0.49616549  | 0.85 | S199  | 0.89 |
| IPI00013215.2 | 4998   | ORC1L    | K.SAESPS  | 0.49616549  | 0.85 | S201  | 0.89 |
| IPI00013215.2 | 4998   | ORC1L    | K.VAFSEIT | 0.401648339 | 0.98 | S273  | 1.02 |
| IPI00013216.1 | 4999   | ORC2L    | R.VVSAPV  | 0.166517367 | 0.94 | T226  | 1    |
| IPI00013216.1 | 4999   | ORC2L    | K.LASELAI | 0.431601138 | 0.98 | T116  | 1.05 |
| IPI00013297.1 | 11333  | PDAP1    | K.RMQS*L  | 0.000508502 | 0.96 | S176  | 0.57 |
| IPI00013415.1 | 6201   | RPS7     | R.SRT*LT/ | 0.684201094 | 0.83 | T121  | 1.01 |
| IPI00013415.1 | 6201   | RPS7     | R.S*RTL/  | 0.530774648 | 0.94 | S119  | 0.95 |
| IPI00013444.3 |        |          | R.SSPAPS  | 0.566916624 | 0.98 | S1883 | 0.99 |
| IPI00013444.3 |        |          | R.SS*PAP  | 0.008098758 | 0.94 | S1873 | 1.13 |
| IPI00013444.3 |        |          | R.S*SPAP  | 0.008098758 | 0.94 | S1872 | 1.13 |
| IPI00013444.3 |        |          | K.ISVGRL  | 0.27446972  | 0.76 | S1734 | 0.83 |
| IPI00013444.3 |        |          | K.AHSEVF  | 0.49616549  | 0.98 | S2681 | 0.99 |
| IPI00013444.3 |        |          | K.LGLVLQ  | 0.431601138 | 0.98 | S476  | 1.2  |
| IPI00013444.3 |        |          | K.LGLVLQ  | 0.431601138 | 0.98 | S479  | 1.2  |
| IPI00013444.3 |        |          | K.SSFTPS  | 0.401648339 | 0.83 | S536  | 1.24 |
| IPI00013452.8 | 2058   | EPRS     | K.EYIPGQ  | 0.32093792  | 0.9  | S886  | 1.08 |
| IPI00013452.8 | 2058   | EPRS     | K.EYIPGQ  | 0.32093792  | 0.9  | T888  | 1.08 |
| IPI00013651.1 | 155435 | RBM33    | R.CSATPS  | 0.604563646 | 0.92 | S185  | 1.12 |
| IPI00013651.1 | 155435 | RBM33    | R.RAADEL  | 0.438828959 | 0.88 | S41   | 0.86 |
| IPI00013743.3 | 84811  | BUD13    | R.ARHDS*  | 0.152571688 | 0.94 | S271  | 1.1  |
| IPI00013743.3 | 84811  | BUD13    | R.ARHDSF  | 0.233505398 | 0.98 | S281  | 1.2  |
| IPI00013743.3 | 84811  | BUD13    | R.HDS*PD  | 0.080258071 | 0.98 | S271  | 1.21 |
| IPI00013774.1 | 3065   | HDAC1    | R.MLPFAF  | 0.346340474 | 1    | S393  | 1.05 |
| IPI00013788.1 | 27336  | HTATSF1  | R.HFS*EH  | 0.726073545 | 0.94 | S403  | 0.95 |
| IPI00013905.1 | 5565   | PRKAB2   | K.IMVGS*1 | 0.026666866 | 0.81 | S39   | 1.35 |
| IPI00013905.1 | 5565   | PRKAB2   | K.S*HNDF  | 0.082584274 | 0.62 | S108  | 0.58 |
| IPI00013905.1 | 5565   | PRKAB2   | R.DLS*SSI | 0.072926818 | 0.94 | S182  | 1.25 |
| IPI00013905.1 | 5565   | PRKAB2   | R.DLSSS*I | 0.072926818 | 0.94 | S184  | 1.25 |
| IPI00013912.1 | 84886  | C1orf198 | R.FTYFSS  | 0.829549043 | 0.96 | S37   | 1.04 |
| IPI00014177.3 | 4735   | 39327    | K.IYHLPD/ | 0.296993866 | 0.98 | S218  | 1.08 |
| IPI00014177.3 | 4735   | 39327    | K.IYHLPD/ | 0.233505398 | 0.98 | T228  | 1.16 |
| IPI00014219.1 | 9784   | SNX17    | K.LSSKLS' | 0.530774648 | 0.9  | S437  | 1.03 |
| IPI00014231.1 | 9929   | JOSD1    | K.SES*LEL | 0.401648339 | 0.72 | S15   | 1.14 |

|               |        |          |           |             |      |      |      |
|---------------|--------|----------|-----------|-------------|------|------|------|
| IPI00014231.1 | 9929   | JOSD1    | K.AKSES*I | 0.751731134 | 0.98 | S15  | 0.93 |
| IPI00014231.1 | 9929   | JOSD1    | K.AKS*ESI | 0.751731134 | 0.98 | S13  | 0.93 |
| IPI00014319.5 | 10625  | IVNS1ABP | K.S*LSFEM | 0.066203153 | 0.24 | S336 | 1.54 |
| IPI00014319.5 | 10625  | IVNS1ABP | K.SLS*FEM | 0.088241621 | 0.92 | S338 | 1.3  |
| IPI00014344.1 | 1859   | DYRK1A   | R.IY*QYIQ | 0.214968943 | 0.98 | Y319 | 1.17 |
| IPI00014344.1 | 1859   | DYRK1A   | R.IYQY*IQ | 0.181528891 | 1    | Y321 | 1.2  |
| IPI00014513.1 | 7528   | YY1      | R.IHT*GDF | 0.727601611 | 0.98 | T378 | 0.93 |
| IPI00014513.1 | 7528   | YY1      | K.KIDIDHE | 0.014056191 | 0.53 | S247 | 0.92 |
| IPI00014575.1 | 990    | CDC6     | R.LGDDNL  | 0.49616549  | 0.86 | T67  | 1.22 |
| IPI00014575.1 | 990    | CDC6     | R.LVFDNC  | 0.431601138 | 0.98 | S106 | 1.07 |
| IPI00014575.1 | 990    | CDC6     | R.LGDDNL  | 0.166517367 | 0.98 | S74  | 1.17 |
| IPI00014865.3 | 63935  | C20orf67 | K.IEIPVTP | 0.373234869 | 0.92 | S144 | 1.1  |
| IPI00014865.3 | 63935  | C20orf67 | K.IEIPVTP | 0.373234869 | 0.92 | S146 | 1.1  |
| IPI00014865.3 | 63935  | C20orf67 | R.EEASLL  | 0.32093792  | 1    | S19  | 1.03 |
| IPI00014977.5 | 254394 | MCM9     | K.NTVVVS  | 0.32093792  | 0.96 | S762 | 1.17 |
| IPI00014977.5 | 254394 | MCM9     | K.SLAQVE  | 0.643675939 | 0.96 | S915 | 1.02 |
| IPI00015195.1 | 1479   | CSTF3    | K.RPNEDS  | 0.233505398 | 0.9  | S691 | 1.1  |
| IPI00015481.1 | 79797  | ZNF408   | R.AKT*PEI | 7.58E-05    | 0.56 | T322 | 0.78 |
| IPI00015538.1 | 23683  | PRKD3    | R.IIGES*I | 0.760488858 | 0.9  | S731 | 1.27 |
| IPI00015538.1 | 23683  | PRKD3    | R.QALMP\  | 0.152571688 | 0.92 | S543 | 0.86 |
| IPI00015538.1 | 23683  | PRKD3    | K.SVLPTA  | 0.000232333 | 0.86 | S27  | 1.94 |
| IPI00015538.1 | 23683  | PRKD3    | K.SVLPTA  | 0.990159288 | 0.98 | S30  | 0.84 |
| IPI00015538.1 | 23683  | PRKD3    | K.TIS*PST | 0.096924105 | 0.92 | S391 | 1.09 |
| IPI00015538.1 | 23683  | PRKD3    | R.LS*NGS  | 0.84064003  | 0.92 | S41  | 1.14 |
| IPI00015538.1 | 23683  | PRKD3    | R.S*VVG   | 0.116581414 | 0.98 | S735 | 1.23 |
| IPI00015538.1 | 23683  | PRKD3    | K.SVLPTA  | 0.32093792  | 0.94 | S27  | 1.03 |
| IPI00015602.1 | 9868   | TOMM70A  | R.AS*PAP  | 0.530774648 | 0.98 | S91  | 1.13 |
| IPI00015602.1 | 9868   | TOMM70A  | R.ASPAP   | 0.530774648 | 0.98 | S96  | 1.13 |
| IPI00015894.1 | 23580  | CDC42EP  | K.AGPDLF  | 0.401648339 | 0.96 | S292 | 1.08 |
| IPI00015894.1 | 23580  | CDC42EP  | K.AGPDLF  | 0.373234869 | 0.9  | S292 | 1.14 |
| IPI00015894.1 | 23580  | CDC42EP  | R.NGAAGF  | 0.431601138 | 0.98 | S174 | 1.15 |
| IPI00015894.1 | 23580  | CDC42EP  | K.AGPDLF  | 0.296993866 | 1    | S295 | 1.15 |
| IPI00015894.1 | 23580  | CDC42EP  | R.RNGAAC  | 0.346340474 | 1    | S174 | 1.08 |
| IPI00015952.1 | 1982   | EIF4G2   | R.TQT*PPI | 0.296993866 | 1    | T508 | 1.15 |
| IPI00015953.3 | 9188   | DDX21    | K.KLSVAC  | 0.938173728 | 0.77 | T296 | 1.11 |
| IPI00015953.3 | 9188   | DDX21    | K.LKNGFP  | 0.957149097 | 0.85 | S168 | 0.95 |
| IPI00015953.3 | 9188   | DDX21    | K.KAEPSE  | 0.684201094 | 0.96 | S71  | 0.96 |
| IPI00015953.3 | 9188   | DDX21    | K.NGFPHF  | 0.863507405 | 0.92 | S168 | 0.95 |
| IPI00015953.3 | 9188   | DDX21    | K.VTKNEE  | 0.373234869 | 0.98 | S121 | 1.05 |
| IPI00015953.3 | 9188   | DDX21    | K.LKNGFP  | 0.530774648 | 0.9  | S171 | 0.98 |
| IPI00015953.3 | 9188   | DDX21    | K.LKNGFP  | 0.643675939 | 0.94 | S171 | 0.97 |
| IPI00015953.3 | 9188   | DDX21    | K.KKEEPS  | 0.684201094 | 0.98 | S89  | 1.02 |
| IPI00015953.3 | 9188   | DDX21    | K.LKNGFP  | 0.463105648 | 0.96 | S173 | 1.02 |
| IPI00015953.3 | 9188   | DDX21    | K.NEEPS*I | 0.346340474 | 1    | S121 | 1.05 |
| IPI00015953.3 | 9188   | DDX21    | K.LKNGFP  | 0.643675939 | 0.98 | S168 | 0.93 |
| IPI00015953.3 | 9188   | DDX21    | K.KKAEPS  | 0.604563646 | 1    | S71  | 0.99 |
| IPI00015953.3 | 9188   | DDX21    | K.KKAEPS  | 0.604563646 | 1    | S65  | 0.99 |
| IPI00015953.3 | 9188   | DDX21    | K.NGFPHF  | 0.463105648 | 0.98 | S171 | 1.04 |
| IPI00015953.3 | 9188   | DDX21    | K.LKNGFP  | 0.684201094 | 1    | S164 | 1.01 |
| IPI00015953.3 | 9188   | DDX21    | K.LKNGFP  | 0.684201094 | 0.98 | S168 | 0.97 |
| IPI00015973.1 | 2037   | EPB41L2  | K.IPGEKS' | 0.072926818 | 0.92 | S828 | 1.13 |

|               |                |            |             |      |       |      |
|---------------|----------------|------------|-------------|------|-------|------|
| IPI00015973.1 | 2037 EPB41L2   | K.HQAS*IE  | 0.49616549  | 0.92 | S647  | 0.97 |
| IPI00015973.1 | 2037 EPB41L2   | K.KQKS*Y   | 0.836096036 | 0.96 | S87   | 0.83 |
| IPI00015973.1 | 2037 EPB41L2   | K.GSQPPF   | 0.401648339 | 0.98 | S58   | 1.05 |
| IPI00015973.1 | 2037 EPB41L2   | R.S*LDGA   | 0.090058644 | 0.81 | S550  | 1.14 |
| IPI00015973.1 | 2037 EPB41L2   | K.EVAENC   | 0.373234869 | 1    | S55   | 1.07 |
| IPI00015973.1 | 2037 EPB41L2   | K.EVAENC   | 0.373234869 | 1    | S58   | 1.07 |
| IPI00015973.1 | 2037 EPB41L2   | K.KNS*LR\  | 0.080258071 | 0.98 | S614  | 0.91 |
| IPI00016074.1 | 10200 MPHOSP   | R.RYETLV   | 0.011294655 | 0.83 | T124  | 0.91 |
| IPI00016250.5 | 9513 FXR2      | R.TGGPAY   | 0.12765804  | 0.94 | S453  | 1.08 |
| IPI00016250.5 | 9513 FXR2      | R.TGGPAY   | 0.12765804  | 0.94 | T451  | 1.08 |
| IPI00016250.5 | 9513 FXR2      | R.RTGGP/   | 0.679764929 | 0.83 | S453  | 1.28 |
| IPI00016250.5 | 9513 FXR2      | R.RTGGP/   | 0.679764929 | 0.83 | T455  | 1.28 |
| IPI00016250.5 | 9513 FXR2      | R.TDGS*IE  | 0.643675939 | 0.94 | S601  | 0.96 |
| IPI00016250.5 | 9513 FXR2      | R.T*DGSI   | 0.604563646 | 0.98 | T598  | 1.02 |
| IPI00016250.5 | 9513 FXR2      | R.TDGSIS'  | 0.604563646 | 1    | S603  | 1.06 |
| IPI00016250.5 | 9513 FXR2      | R.T*DGSI   | 0.604563646 | 1    | T598  | 1.06 |
| IPI00016250.5 | 9513 FXR2      | R.TDGS*IE  | 0.27446972  | 1    | S601  | 1.13 |
| IPI00016250.5 | 9513 FXR2      | R.T*DGSI   | 0.27446972  | 1    | T598  | 1.13 |
| IPI00016387.4 | 51585 PCF11    | K.IYHPSC'  | 0.489032481 | 0.96 | S1495 | 0.87 |
| IPI00016387.4 | 51585 PCF11    | K.IYHPSC'  | 0.726073545 | 0.61 | S1493 | 0.83 |
| IPI00016387.4 | 51585 PCF11    | K.SRS*PIII | 0.971449831 | 0.86 | S489  | 1.03 |
| IPI00016387.4 | 51585 PCF11    | R.IDGPPT'  | 0.152571688 | 0.96 | T785  | 0.99 |
| IPI00016387.4 | 51585 PCF11    | K.FLNKSP   | 0.214968943 | 0.98 | T178  | 0.93 |
| IPI00016387.4 | 51585 PCF11    | K.FLNKS*F  | 0.214968943 | 0.98 | S169  | 0.93 |
| IPI00016387.4 | 51585 PCF11    | K.IYHPSC'  | 0.49616549  | 0.94 | Y1482 | 0.94 |
| IPI00016387.4 | 51585 PCF11    | K.IYHPSC'  | 0.604563646 | 0.94 | S1493 | 1.01 |
| IPI00016387.4 | 51585 PCF11    | K.IYHPSC'  | 0.431601138 | 0.86 | S1487 | 0.94 |
| IPI00016387.4 | 51585 PCF11    | K.IYHPSC'  | 0.401648339 | 0.74 | S1495 | 0.93 |
| IPI00016387.4 | 51585 PCF11    | K.IYHPSC'  | 0.726073545 | 0.98 | S1495 | 1.04 |
| IPI00016387.4 | 51585 PCF11    | K.IYHPSC'  | 0.643675939 | 0.88 | S1493 | 1.02 |
| IPI00016387.4 | 51585 PCF11    | R.EEQRS*   | 0.346340474 | 1    | S705  | 1.1  |
| IPI00016405.1 | 54940 OCIAD1   | K.KLENS*F  | 0.643675939 | 0.98 | S108  | 0.86 |
| IPI00016604.1 | 5142 PDE4B     | R.RES*FL'  | 0.006469654 | 0.96 | S133  | 1.26 |
| IPI00016610.2 | 5093 PCBP1     | R.VMTIPY(  | 0.431601138 | 0.98 | S190  | 1.04 |
| IPI00016610.2 | 5093 PCBP1     | R.CSDAAC   | 0.627992512 | 0.98 | S223  | 0.85 |
| IPI00016610.2 | 5093 PCBP1     | R.CSDAAC   | 0.510604444 | 0.98 | T229  | 0.86 |
| IPI00016610.2 | 5093 PCBP1     | R.CSDAAC   | 0.684201094 | 0.98 | S231  | 0.86 |
| IPI00016639.5 | 5584 PRKCI     | K.QVPPF    | 0.373234869 | 0.94 | T564  | 0.99 |
| IPI00016639.5 | 5584 PRKCI     | K.EGLRPC   | 0.181528891 | 0.98 | T412  | 1.16 |
| IPI00016639.5 | 5584 PRKCI     | K.EGLRPC   | 0.166517367 | 0.98 | T409  | 1.16 |
| IPI00016670.2 | 55004 C11orf59 | R.KLLLDPI  | 0.530774648 | 0.83 | S27   | 0.89 |
| IPI00016670.2 | 55004 C11orf59 | R.LAVLSS'  | 0.044139359 | 0.96 | S98   | 1.1  |
| IPI00016725.1 | 9329 GTF3C4    | K.TPSEAL'  | 0.604563646 | 0.98 | S604  | 0.93 |
| IPI00016743.1 | 11320 MGAT4A   | K.EFS*KEI  | 0           | 0.96 | S197  | 0.03 |
| IPI00016861.4 | 2976 GTF3C2    | R.AHFNAM   | 0.604563646 | 0.96 | S903  | 1.12 |
| IPI00016861.4 | 2976 GTF3C2    | R.AHFNAM   | 0.27446972  | 0.98 | T906  | 1.16 |
| IPI00016861.4 | 2976 GTF3C2    | R.AHFNAM   | 0.27446972  | 1    | S904  | 1.08 |
| IPI00017292.1 | 1499 CTNNB1    | R.RTSMGC   | 0.346340474 | 0.98 | T556  | 0.96 |
| IPI00017292.1 | 1499 CTNNB1    | R.T*SMGC   | 0.044561326 | 0.79 | T551  | 1    |
| IPI00017292.1 | 1499 CTNNB1    | R.TS*MG    | 0.044561326 | 0.79 | S552  | 1    |
| IPI00017292.1 | 1499 CTNNB1    | R.RTS*MG   | 0.401648339 | 1    | S552  | 1.1  |

|               |              |            |             |            |      |
|---------------|--------------|------------|-------------|------------|------|
| IPI00017292.1 | 1499 CTNNB1  | K.RLS*VEI  | 0.726073545 | 1 S675     | 1.03 |
| IPI00017297.1 | 9782 MATR3   | R.RRT*EEI  | 0.080258071 | 0.76 T150  | 1.14 |
| IPI00017297.1 | 9782 MATR3   | R.GPSLNF   | 0.566916624 | 0.9 Y202   | 1.2  |
| IPI00017297.1 | 9782 MATR3   | R.GPSLNF   | 0.233505398 | 0.9 S206   | 1.2  |
| IPI00017297.1 | 9782 MATR3   | R.GPSLNF   | 0.080258071 | 1 S208     | 1.29 |
| IPI00017297.1 | 9782 MATR3   | R.RRTEEG   | 0.463105648 | 1 T155     | 1.06 |
| IPI00017297.1 | 9782 MATR3   | R.RRTEEG   | 0.463105648 | 1 S157     | 1.06 |
| IPI00017297.1 | 9782 MATR3   | R.GPSLNF   | 0.060044376 | 1 S206     | 1.31 |
| IPI00017297.1 | 9782 MATR3   | R.RDSFDC   | 0.726073545 | 1 S206     | 0.97 |
| IPI00017297.1 | 9782 MATR3   | R.RDS*FD   | 0.643675939 | 0.96 S188  | 0.94 |
| IPI00017297.1 | 9782 MATR3   | R.RDSFDC   | 0.566916624 | 0.96 S195  | 0.94 |
| IPI00017450.2 | 2962 GTF2F1  | R.LDTGPC   | 0.002900458 | 0.76 S433  | 1.84 |
| IPI00017450.2 | 2962 GTF2F1  | R.LDTGPC   | 5.97E-06    | 0.98 S436  | 2.08 |
| IPI00017450.2 | 2962 GTF2F1  | R.GNSRPC   | 0.039790008 | 0.28 T389  | 0.05 |
| IPI00017450.2 | 2962 GTF2F1  | R.GNS*RP   | 0.296993866 | 1 S385     | 1.18 |
| IPI00017450.2 | 2962 GTF2F1  | R.GNS*RP   | 0.01942062  | 1 S385     | 1.32 |
| IPI00017578.1 | 6461 SHB     | K.HGS*PE   | 0.12765804  | 0.96 S475  | 1.19 |
| IPI00017617.1 | 1655 DDX5    | K.LLQLVEI  | 0.040276449 | 0.72 S480  | 1.07 |
| IPI00017630.4 | 26747 NUFIP1 | K.LEGPPE   | 0.346340474 | 0.77 S340  | 0.91 |
| IPI00017630.4 | 26747 NUFIP1 | K.LEGPPE   | 0.03637398  | 0.77 S342  | 1.12 |
| IPI00017630.4 | 26747 NUFIP1 | K.LEGPPE   | 0.03637398  | 0.77 S340  | 1.12 |
| IPI00017630.4 | 26747 NUFIP1 | K.LEGPPE   | 0.03637398  | 0.77 S351  | 1.12 |
| IPI00017763.4 | 4676 NAP1L4  | R.LDNVPH   | 0.684201094 | 0.92 S53   | 1.07 |
| IPI00017763.4 | 4676 NAP1L4  | R.LDNVPH   | 0.684201094 | 0.92 T51   | 1.07 |
| IPI00018009.2 | 80153 EDC3   | K.KPAS*SI  | 0.909927945 | 0.96 S109  | 0.91 |
| IPI00018009.2 | 80153 EDC3   | R.RHNS*W   | 0.373234869 | 0.88 S161  | 1.05 |
| IPI00018009.2 | 80153 EDC3   | R.RHNS*W   | 0.373234869 | 0.88 S166  | 1.05 |
| IPI00018117.1 | 1611 DAP     | K.DKDDQE   | 0.166517367 | 0.9 S49    | 1.09 |
| IPI00018117.1 | 1611 DAP     | K.EEKDKC   | 0.27446972  | 0.98 S51   | 1.07 |
| IPI00018117.1 | 1611 DAP     | K.DKDDQE   | 0.296993866 | 1 S51      | 1.07 |
| IPI00018208.1 | 23548 TTC33  | K.KSEAPA   | 0.214968943 | 0.9 S197   | 2    |
| IPI00018240.6 | 55153 SDAD1  | K.YIEIDS*I | 0.116581414 | 0.98 S585  | 1.09 |
| IPI00018274.1 | 1956 EGFR    | R.MHLPSF   | 0.743182508 | 0.94 S995  | 1    |
| IPI00018274.1 | 1956 EGFR    | R.MHLPS*   | 0.373234869 | 1 S991     | 1.13 |
| IPI00018274.1 | 1956 EGFR    | R.ELVEPL   | 0.463105648 | 1 T693     | 1.01 |
| IPI00018294.3 | 6018 RLF     | K.S*PSAIP  | 0.795669231 | 0.98 S632  | 0.94 |
| IPI00018294.3 | 6018 RLF     | K.SPS*AIP  | 0.795669231 | 0.98 S634  | 0.94 |
| IPI00018321.5 | 9869 SETDB1  | R.NYGYNF   | 0.233505398 | 0.98 S1066 | 1.07 |
| IPI00018349.5 | 4173 MCM4    | R.RGEDSI   | 0.170313028 | 0.83 S54   | 0.74 |
| IPI00018889.2 | 2737 GLI3    | R.SPGRPT   | 1.06E-05    | 0.81 T669  | 0.7  |
| IPI00018924.2 | 10363 HMG20A | R.DSNAPK   | 0.431601138 | 1 S105     | 1.07 |
| IPI00018974.1 | 1746 DLX2    | K.SGEIPSI  | 0.233505398 | 0.85 S227  | 1.19 |
| IPI00018974.1 | 1746 DLX2    | K.SGEIPSI  | 0.37570848  | 0.76 S225  | 0.81 |
| IPI00019155.1 | 2303 FOXC2   | K.GAPAT*I  | 0.383343176 | 0.58 T197  | 0.96 |
| IPI00019155.1 | 2303 FOXC2   | R.SAAST*I  | 0.976229102 | 0.55 T247  | 0.89 |
| IPI00019155.1 | 2303 FOXC2   | K.VETLS*F  | 0.373234869 | 0.96 S232  | 1.22 |
| IPI00019155.1 | 2303 FOXC2   | K.VETLS*F  | 0.012189999 | 0.86 S232  | 0.38 |
| IPI00019155.1 | 2303 FOXC2   | K.VETLSP   | 0.566916624 | 0.98 S240  | 1.14 |
| IPI00019155.1 | 2303 FOXC2   | R.T*SPPGI  | 0.530774648 | 0.94 T280  | 1.11 |
| IPI00019155.1 | 2303 FOXC2   | R.TS*PPGI  | 0.530774648 | 0.94 S281  | 1.11 |
| IPI00019155.1 | 2303 FOXC2   | K.SEAAS*I  | 0.643675939 | 0.98 S219  | 1.05 |



|               |               |           |             |      |       |      |
|---------------|---------------|-----------|-------------|------|-------|------|
| IPI00019451.3 | 55257 C2orf20 | K.VLTANS  | 0.684201094 | 0.86 | S195  | 0.69 |
| IPI00019471.1 | 3667 IRS1     | R.HSS*ETI | 0.03637398  | 0.96 | S1101 | 1.12 |
| IPI00019471.1 | 3667 IRS1     | R.SKSQSE  | 0.726073545 | 0.96 | S274  | 0.96 |
| IPI00019471.1 | 3667 IRS1     | R.S*KSQS  | 0.726073545 | 0.96 | S268  | 0.96 |
| IPI00019471.1 | 3667 IRS1     | R.RHSS*E  | 0.181528891 | 0.98 | S1101 | 1.21 |
| IPI00019551.1 | 7262 PHLDA2   | R.LSLFPAI | 0.604563646 | 0.98 | S42   | 1.02 |
| IPI00019835.1 | 83596 BCL2L12 | R.RGEAAC  | 0.431601138 | 0.9  | S113  | 1.08 |
| IPI00019835.1 | 83596 BCL2L12 | K.LVRLS*E | 0.858914691 | 0.98 | S242  | 0.98 |
| IPI00019993.1 | 4605 MYBL2    | K.DCKPPV  | 0.066203153 | 0.67 | S241  | 1.05 |
| IPI00019993.1 | 4605 MYBL2    | K.YSMDN1  | 0.566916624 | 0.83 | T518  | 1.4  |
| IPI00019993.1 | 4605 MYBL2    | K.TLPFS*F | 0.066203153 | 0.81 | S452  | 0.96 |
| IPI00019994.3 | 55787 CXorf15 | R.NLVS*P) | 0.643675939 | 0.9  | S97   | 1.06 |
| IPI00019994.3 | 55787 CXorf15 | R.NLVSPA  | 0.011294655 | 0.81 | T102  | 1.45 |
| IPI00020124.1 | 55361 PI4KII  | R.VAAAAC  | 0.827038504 | 0.81 | S47   | 0.94 |
| IPI00020385.1 | 11154 AP4S1   | R.VS*ELD) | 0.684519102 | 0.96 | S99   | 0.82 |
| IPI00020484.3 | 51203 NUSAP1  | R.GRLS*V) | 0.003257359 | 0.83 | S239  | 0.94 |
| IPI00020484.3 | 51203 NUSAP1  | K.LTTEAT) | 0.818022374 | 0.98 | T348  | 0.92 |
| IPI00020484.3 | 51203 NUSAP1  | K.LTTEAT) | 0.530774648 | 0.96 | T348  | 1.01 |
| IPI00020484.3 | 51203 NUSAP1  | R.GRLS*V) | 0.373234869 | 1    | S239  | 1.04 |
| IPI00020484.3 | 51203 NUSAP1  | K.AS*LSRF | 0.936890791 | 0.98 | S362  | 1.03 |
| IPI00020578.2 | 369 ARAF      | R.S*TSTPI | 0.346340474 | 0.96 | S215  | 1.2  |
| IPI00020578.2 | 369 ARAF      | R.STST*PI | 0.346340474 | 0.96 | T218  | 1.2  |
| IPI00021129.4 | 8546 AP3B1    | K.PAPLLE) | 0.296993866 | 0.88 | S609  | 1.21 |
| IPI00021167.3 | 8575 PRKRA    | R.AEAPPL  | 0.166517367 | 0.9  | T20   | 1.18 |
| IPI00021167.3 | 8575 PRKRA    | R.AEAPPL  | 0.166517367 | 0.9  | S18   | 1.18 |
| IPI00021175.1 | 51755 CRKRS   | K.ETTSGT  | 0.088241621 | 0.85 | S1082 | 1.17 |
| IPI00021175.1 | 51755 CRKRS   | R.HSS*IS* | 0.233505398 | 0.85 | S383  | 1.01 |
| IPI00021175.1 | 51755 CRKRS   | R.KETTSG  | 0.253322457 | 0.98 | S1082 | 1.11 |
| IPI00021175.1 | 51755 CRKRS   | K.AIT*PPQ | 0.726073545 | 0.4  | T692  | 0.68 |
| IPI00021175.1 | 51755 CRKRS   | R.RQS*VS  | 0.431601138 | 0.98 | S274  | 1.03 |
| IPI00021175.1 | 51755 CRKRS   | R.LYNSEE  | 0.566916624 | 1    | T893  | 1.1  |
| IPI00021175.1 | 51755 CRKRS   | R.HLLTDLI | 0.32093792  | 0.96 | S681  | 1.15 |
| IPI00021301.1 | 443 ASPA      | R.YIDCDLI | 1.21E-11    | 0.72 | S83   | 4.05 |
| IPI00021320.2 | 56257 BCDIN3  | R.T*LNAE1 | 0.080258071 | 0.79 | T208  | 1.12 |
| IPI00021320.2 | 56257 BCDIN3  | R.ES*PGA  | 0.139636808 | 0.98 | S69   | 1.25 |
| IPI00021320.2 | 56257 BCDIN3  | R.CAPSAC  | 0.463105648 | 0.94 | S60   | 1.11 |
| IPI00021320.2 | 56257 BCDIN3  | R.RVNSDC  | 0.519333664 | 0.76 | S179  | 0.67 |
| IPI00021320.2 | 56257 BCDIN3  | R.RNS*CN  | 0.463105648 | 1    | S152  | 1.06 |
| IPI00021320.2 | 56257 BCDIN3  | R.VNS*DC  | 0.277173616 | 0.96 | S175  | 0.86 |
| IPI00021320.2 | 56257 BCDIN3  | R.CAPSAC  | 0.076938277 | 0.79 | S60   | 0.79 |
| IPI00021320.2 | 56257 BCDIN3  | R.TLNAET  | 0.985805237 | 1    | S216  | 0.94 |
| IPI00021320.2 | 56257 BCDIN3  | R.TLNAET  | 0.957149097 | 1    | S217  | 0.94 |
| IPI00021320.2 | 56257 BCDIN3  | K.DITDPLS | 0.643675939 | 0.98 | S254  | 1.04 |
| IPI00021320.2 | 56257 BCDIN3  | R.RVNS*D  | 0.985805237 | 1    | S175  | 0.93 |
| IPI00021388.1 | 9969 THRAP1   | K.KYS*AS) | 0.86862174  | 0.92 | S395  | 0.84 |
| IPI00021388.1 | 9969 THRAP1   | R.LLS*TEF | 0.566916624 | 0.85 | S2048 | 0.91 |
| IPI00021388.1 | 9969 THRAP1   | K.IEVDEGI | 0.643675939 | 0.71 | S890  | 1.19 |
| IPI00021417.3 | 9092 SART1    | K.KKPDYL  | 0.430690939 | 0.74 | S321  | 1.13 |
| IPI00021417.3 | 9092 SART1    | R.RRVSE*E | 0.197661257 | 0.94 | S448  | 0.95 |
| IPI00021417.3 | 9092 SART1    | R.RVSEVE  | 0.166517367 | 0.96 | T466  | 1.07 |
| IPI00021417.3 | 9092 SART1    | R.RVSEVE  | 0.166517367 | 0.96 | S463  | 1.07 |

|               |               |           |             |            |      |
|---------------|---------------|-----------|-------------|------------|------|
| IPI00021417.3 | 9092 SART1    | R.RVS*EV  | 0.116581414 | 0.96 S448  | 1.07 |
| IPI00021595.2 | 113263 GLCCI1 | R.GPSPSE  | 0.233505398 | 0.86 S108  | 1.18 |
| IPI00021595.2 | 113263 GLCCI1 | R.RTSS*LI | 0.181528891 | 0.98 S172  | 1.18 |
| IPI00021595.2 | 113263 GLCCI1 | R.RTS*SLI | 0.181528891 | 0.98 S171  | 1.18 |
| IPI00021634.3 | 64837 KLC2    | K.RASS*LI | 0.000698007 | 0.96 S582  | 1.17 |
| IPI00021634.3 | 64837 KLC2    | K.RASS*LI | 0.088241621 | 0.98 S582  | 1.25 |
| IPI00021634.3 | 64837 KLC2    | R.ASS*LN  | 0.233505398 | 0.98 S582  | 1.09 |
| IPI00021786.1 | 5894 RAF1     | R.STST*PI | 0.566916624 | 0.96 T260  | 1.18 |
| IPI00021786.1 | 5894 RAF1     | R.YSTPHA  | 0.530774648 | 1 T239     | 1.13 |
| IPI00021786.1 | 5894 RAF1     | R.YST*PH  | 0.214968943 | 1 T234     | 1.13 |
| IPI00021786.1 | 5894 RAF1     | R.YS*TPH  | 0.116581414 | 1 S233     | 1.24 |
| IPI00021786.1 | 5894 RAF1     | R.Y*STPH  | 0.116581414 | 1 Y232     | 1.24 |
| IPI00021786.1 | 5894 RAF1     | R.ST*STPI | 0.401648339 | 1 T258     | 1.14 |
| IPI00021786.1 | 5894 RAF1     | R.STS*TP  | 0.296993866 | 1 S259     | 1.14 |
| IPI00021954.1 | 8729 GBF1     | R.GYTS*D  | 0.604563646 | 1 S1318    | 1.11 |
| IPI00021954.1 | 8729 GBF1     | R.GYTSDS  | 0.27446972  | 1 T1324    | 1.11 |
| IPI00021954.1 | 8729 GBF1     | R.GYT*SD  | 0.27446972  | 1 T1317    | 1.11 |
| IPI00021954.1 | 8729 GBF1     | R.GYTSDS  | 0.27446972  | 1 S1320    | 1.11 |
| IPI00021954.1 | 8729 GBF1     | R.GY*TSD  | 0.27446972  | 1 Y1316    | 1.11 |
| IPI00022019.1 | 8819 SAP30    | R.KGS*DD  | 0.604563646 | 0.81 S131  | 0.99 |
| IPI00022019.1 | 8819 SAP30    | R.KGS*DD  | 0.000485008 | 0.88 S131  | 1.13 |
| IPI00022145.5 | 64710 NUCKS1  | K.ATVTPS  | 0.096924105 | 0.96 S181  | 1.19 |
| IPI00022145.5 | 64710 NUCKS1  | K.ATVTPS  | 0.106353987 | 0.98 S181  | 1.15 |
| IPI00022145.5 | 64710 NUCKS1  | R.LKATVT  | 0.373234869 | 0.98 T179  | 1.05 |
| IPI00022145.5 | 64710 NUCKS1  | K.VVDYSC  | 0.088241621 | 0.94 S19   | 1.16 |
| IPI00022145.5 | 64710 NUCKS1  | R.LKATVT  | 0.197661257 | 1 S181     | 1.15 |
| IPI00022145.5 | 64710 NUCKS1  | R.KVVDYS  | 0.166517367 | 0.96 S19   | 1.04 |
| IPI00022215.1 | 23394 ADNP    | K.ADIPVK  | 0.795669231 | 0.98 S607  | 1.01 |
| IPI00022215.1 | 23394 ADNP    | R.YSLQSA  | 0.726073545 | 0.98 S409  | 1.14 |
| IPI00022215.1 | 23394 ADNP    | K.ADIPVK  | 0.566916624 | 1 S608     | 1.03 |
| IPI00022215.1 | 23394 ADNP    | K.LMHNAS  | 0.072926818 | 0.94 S953  | 1.22 |
| IPI00022215.1 | 23394 ADNP    | R.LSNPQI  | 0.166517367 | 0.9 S1071  | 1.35 |
| IPI00022479.4 | 8925 HERC1    | R.RVS*TD  | 0.253322457 | 0.98 S1428 | 1.04 |
| IPI00022628.3 | 9053 MAP7     | K.RLSSSS  | 0.431601138 | 0.72 T205  | 0.81 |
| IPI00022628.3 | 9053 MAP7     | K.LFVT*PF | 0.060044376 | 0.77 T277  | 0.84 |
| IPI00022628.3 | 9053 MAP7     | R.IIHGTAS | 0.566916624 | 0.94 S293  | 0.96 |
| IPI00022628.3 | 9053 MAP7     | K.RLS*SS  | 0.49616549  | 0.96 S200  | 1.03 |
| IPI00022628.3 | 9053 MAP7     | R.SKST*AV | 0.12765804  | 0.92 T243  | 1.05 |
| IPI00022628.3 | 9053 MAP7     | R.SKS*TA  | 0.12765804  | 0.92 S242  | 1.05 |
| IPI00022628.3 | 9053 MAP7     | K.RLSSSS  | 0.530774648 | 1 S209     | 1.08 |
| IPI00022628.3 | 9053 MAP7     | K.RLSSSS  | 0.952395062 | 0.98 S202  | 0.96 |
| IPI00022628.3 | 9053 MAP7     | R.LQLS*PA | 0.566916624 | 0.98 S219  | 1.05 |
| IPI00022649.3 | 6558 SLC12A2  | K.KES*KG  | 0.530774648 | 0.98 S994  | 0.96 |
| IPI00022649.3 | 6558 SLC12A2  | K.LLRPSL  | 0.604563646 | 0.86 T268  | 0.87 |
| IPI00022649.3 | 6558 SLC12A2  | K.LLRPSL  | 0.604563646 | 0.45 S265  | 0.64 |
| IPI00022790.1 | 4236 MFAP1    | R.SLAALD  | 0.455306331 | 0.79 T267  | 0.74 |
| IPI00023030.1 | 81539 SLC38A1 | R.RS*LTN  | 0.000379914 | 0.64 S52   | 0.96 |
| IPI00023100.5 | 1855 DVL1     | R.ELAAVP  | 3.40E-08    | 0.86 S679  | 0.93 |
| IPI00023103.1 | 1856 DVL2     | R.TSGIGD  | 0.760488858 | 0.85 S143  | 1.04 |
| IPI00023177.3 | 10036 CHAF1A  | R.GLLSNH  | 0.463105648 | 0.98 S772  | 1.1  |
| IPI00023177.3 | 10036 CHAF1A  | R.SPSTT*  | 0.373234869 | 0.94 T779  | 1.02 |

|               |               |           |             |           |      |
|---------------|---------------|-----------|-------------|-----------|------|
| IPI00023177.3 | 10036 CHAF1A  | R.SPS*TT\ | 0.530774648 | 0.98 S777 | 0.91 |
| IPI00023177.3 | 10036 CHAF1A  | K.SPDLEA  | 0.346340474 | 0.86 T74  | 1.14 |
| IPI00023177.3 | 10036 CHAF1A  | R.S*PSTT\ | 0.530774648 | 1 S775    | 1.02 |
| IPI00023177.3 | 10036 CHAF1A  | K.S*PDLE/ | 0.346340474 | 0.9 S65   | 0.91 |
| IPI00023177.3 | 10036 CHAF1A  | R.SPST*T\ | 0.604563646 | 1 T778    | 1.03 |
| IPI00023591.1 | 5813 PURA     | R.GPGLG\$ | 0.106353987 | 0.81 S182 | 0.9  |
| IPI00023649.1 | 55206 SBNO1   | K.KKSIDPI | 0.049260986 | 0.81 S799 | 1.14 |
| IPI00023649.1 | 55206 SBNO1   | K.LYSLLGI | 0.472044151 | 0.83 S692 | 0.76 |
| IPI00023649.1 | 55206 SBNO1   | K.KKS*IDP | 0.990601784 | 0.9 S794  | 0.97 |
| IPI00023649.1 | 55206 SBNO1   | K.KKSIDPI | 4.62E-06    | 0.9 S807  | 0.97 |
| IPI00023649.1 | 55206 SBNO1   | K.RPSFS*! | 0.296993866 | 0.66 S817 | 0.99 |
| IPI00023664.3 | 1111 CHEK1    | R.VTS*GG  | 0.8197889   | 0.96 S280 | 1.06 |
| IPI00023664.3 | 1111 CHEK1    | R.TGLSLW  | 0.49616549  | 0.71 T330 | 0.88 |
| IPI00023748.3 | 4666 NACA     | K.VQGEA\  | 0.296993866 | 0.88 S166 | 1.06 |
| IPI00023860.1 | 4673 NAP1L1   | R.LDGLVE  | 0.106353987 | 0.9 T62   | 1.14 |
| IPI00024167.1 | 51575 ESF1    | K.FKIDSNI | 0.080258071 | 0.94 S153 | 1.25 |
| IPI00024167.1 | 51575 ESF1    | K.ALAEAA  | 0.684201094 | 0.94 S663 | 1.02 |
| IPI00024167.1 | 51575 ESF1    | K.ALAEAA  | 0.684201094 | 0.94 S657 | 0.96 |
| IPI00024167.1 | 51575 ESF1    | R.TLDSGT  | 0.463105648 | 1 S198    | 1.01 |
| IPI00024214.1 | 7014 TERF2    | K.DLVLPT! | 0.530774648 | 1 S323    | 1.06 |
| IPI00024291.2 | 572 BAD       | R.S*APPN  | 0.253322457 | 0.79 S99  | 1.2  |
| IPI00024312.2 | 2245 FGD1     | K.S*LSLDF | 0.373234869 | 0.96 S114 | 1.12 |
| IPI00024320.1 | 5935 RBM3     | R.NQGGYI  | 0.200615036 | 0.96 S147 | 0.84 |
| IPI00024387.1 | 3169 FOXA1    | R.KDPSG/  | 0.152571688 | 0.98 S308 | 1.3  |
| IPI00024579.1 | 56852 RAD18   | R.NHLLQF  | 0.463105648 | 0.94 S99  | 1.05 |
| IPI00024579.1 | 56852 RAD18   | R.NHLLQF  | 0.296993866 | 0.96 S99  | 1.07 |
| IPI00024579.1 | 56852 RAD18   | R.NHLLQF  | 0.463105648 | 0.94 S99  | 0.91 |
| IPI00024579.1 | 56852 RAD18   | R.NHLLQF  | 0.604563646 | 0.98 S103 | 0.98 |
| IPI00024618.2 | 56941 C3orf37 | K.TPQKEE  | 0.080258071 | 1 S322    | 1.26 |
| IPI00024650.1 | 6566 SLC16A1  | K.KESKEE  | 0.066203153 | 0.88 S467 | 1.16 |
| IPI00024650.1 | 6566 SLC16A1  | K.KES*KEI | 0.643675939 | 0.88 S461 | 0.86 |
| IPI00024662.1 | 23468 CBX5    | K.RKS*NF! | 0.373234869 | 1 S92     | 1.1  |
| IPI00024662.1 | 23468 CBX5    | K.RKSNFS  | 0.373234869 | 1 S95     | 1.1  |
| IPI00024816.3 | 56947 C2orf33 | R.VLTLSEI | 0.32093792  | 0.92 T111 | 0.99 |
| IPI00024816.3 | 56947 C2orf33 | R.VLTLSEI | 0.726073545 | 1 T112    | 0.99 |
| IPI00024970.2 | 3619 INCENP   | R.RIS*YVC | 0.497617381 | 0.88 S72  | 0.77 |
| IPI00024970.2 | 3619 INCENP   | R.HS*PIAF | 0.373234869 | 0.88 S306 | 1.1  |
| IPI00024970.2 | 3619 INCENP   | R.HSPIAP! | 0.003656496 | 0.86 S312 | 1.03 |
| IPI00024970.2 | 3619 INCENP   | K.RTS*SA\ | 0.604563646 | 0.88 S898 | 0.97 |
| IPI00024970.2 | 3619 INCENP   | R.TDSQS*  | 0.373234869 | 0.96 S302 | 0.97 |
| IPI00024970.2 | 3619 INCENP   | R.TDS*QS  | 0.373234869 | 0.96 S300 | 0.97 |
| IPI00024970.2 | 3619 INCENP   | R.T*DSQS  | 0.373234869 | 0.98 T298 | 1.06 |
| IPI00024970.2 | 3619 INCENP   | R.T*DSQS  | 0.373234869 | 0.98 T298 | 1.06 |
| IPI00024970.2 | 3619 INCENP   | R.DSPAFP  | 0.054409842 | 0.88 S275 | 1.04 |
| IPI00024970.2 | 3619 INCENP   | R.RISY*VC | 0.891255812 | 1 Y73     | 0.93 |
| IPI00024970.2 | 3619 INCENP   | R.IAQVS*F | 0.566916624 | 1 S263    | 1.02 |
| IPI00024970.2 | 3619 INCENP   | R.HS*PIAF | 0.401648339 | 1 S306    | 1.07 |
| IPI00024970.2 | 3619 INCENP   | R.HS*PIAF | 0.401648339 | 1 S306    | 1.07 |
| IPI00024970.2 | 3619 INCENP   | R.VLAPILF | 0.643675939 | 1 T292    | 0.99 |
| IPI00024970.2 | 3619 INCENP   | R.TDSQS*  | 0.566916624 | 1 S302    | 1.02 |
| IPI00024970.2 | 3619 INCENP   | R.TDSQSV  | 0.463105648 | 1 S306    | 1.02 |

|               |               |            |             |            |      |
|---------------|---------------|------------|-------------|------------|------|
| IPI00024971.1 | 5007 OSBP     | R.T*GSNIE  | 0.214968943 | 0.85 T377  | 0.98 |
| IPI00024971.1 | 5007 OSBP     | R.TGS*NIE  | 0.214968943 | 0.85 S379  | 0.98 |
| IPI00024971.1 | 5007 OSBP     | K.GDMS*C   | 0.181528891 | 0.83 S351  | 1.05 |
| IPI00024971.1 | 5007 OSBP     | K.MLAES*I  | 0.253322457 | 0.77 S190  | 1.02 |
| IPI00024971.1 | 5007 OSBP     | R.T*GSNIE  | 0.545847833 | 0.92 T377  | 0.94 |
| IPI00024971.1 | 5007 OSBP     | R.TGS*NIE  | 0.545847833 | 0.92 S379  | 0.94 |
| IPI00024971.1 | 5007 OSBP     | K.MLAES*I  | 0.463105648 | 0.98 S190  | 1.08 |
| IPI00025156.4 | 10273 STUB1   | R.LGAGGC   | 0.463105648 | 0.98 S19   | 1.06 |
| IPI00025830.1 | 7465 WEE1     | K.SPAAPY   | 0.181528891 | 0.98 S139  | 1.13 |
| IPI00026089.3 | 23451 SF3B1   | K.LSSWDC   | 0.566916624 | 0.08 T223  | 0.65 |
| IPI00026089.3 | 23451 SF3B1   | K.LSSWDC   | 0.877341226 | 0.79 T227  | 0.73 |
| IPI00026089.3 | 23451 SF3B1   | K.T*ERDTI  | 0.197661257 | 0.92 T299  | 0.94 |
| IPI00026089.3 | 23451 SF3B1   | K.LTATPT'  | 0.004600913 | 0.58 T436  | 1.1  |
| IPI00026089.3 | 23451 SF3B1   | K.TERDT*I  | 0.296993866 | 0.98 T303  | 1.08 |
| IPI00026089.3 | 23451 SF3B1   | K.IWDPT*F  | 0.116581414 | 0.85 T257  | 0.8  |
| IPI00026089.3 | 23451 SF3B1   | K.SRWDE    | 0.181528891 | 0.92 T341  | 1.03 |
| IPI00026089.3 | 23451 SF3B1   | K.SRWDE    | 0.566916624 | 0.98 T350  | 1.08 |
| IPI00026089.3 | 23451 SF3B1   | K.LTAT*PT  | 0.066203153 | 0.92 T434  | 0.98 |
| IPI00026089.3 | 23451 SF3B1   | K.VVNGAA   | 0.961160996 | 0.98 S194  | 1.06 |
| IPI00026089.3 | 23451 SF3B1   | R.RWDQT    | 0.296993866 | 0.94 T211  | 0.98 |
| IPI00026089.3 | 23451 SF3B1   | R.WDQTAI   | 0.431601138 | 0.96 T211  | 0.89 |
| IPI00026089.3 | 23451 SF3B1   | R.TMIIS*PI | 0.060044376 | 0.83 S129  | 1.11 |
| IPI00026089.3 | 23451 SF3B1   | R.TMIIS*PI | 0.877341226 | 0.67 S129  | 0.76 |
| IPI00026089.3 | 23451 SF3B1   | K.KLSSWE   | 0.49616549  | 1 T223     | 1.05 |
| IPI00026089.3 | 23451 SF3B1   | R.WDETP/   | 0.627992512 | 0.94 T350  | 0.89 |
| IPI00026089.3 | 23451 SF3B1   | R.WDETP/   | 0.627992512 | 0.94 S349  | 0.89 |
| IPI00026089.3 | 23451 SF3B1   | K.LSSWDC   | 0.530774648 | 0.98 T223  | 0.93 |
| IPI00026219.4 | 29894 CPSF1   | R.SGPEAE   | 0.86862174  | 0.85 S756  | 1.12 |
| IPI00026230.1 | 3188 HNRPH2   | K.HTGPNS   | 0.32093792  | 1 S104     | 1.09 |
| IPI00026302.3 | 6160 RPL31    | R.KRNEDE   | 0.777986561 | 0.96 S98   | 0.96 |
| IPI00026317.3 | 51341 ZBTB7A  | R.GGAPDF   | 0.401648339 | 1 S526     | 1.07 |
| IPI00026317.3 | 51341 ZBTB7A  | R.GGAPDF   | 0.32093792  | 0.98 S525  | 1.02 |
| IPI00026320.1 | 51366 UBR5    | R.FQLRS*I  | 0.684201094 | 0.77 S578  | 1.23 |
| IPI00026320.1 | 51366 UBR5    | R.RIS*QSC  | 0.106353987 | 0.96 S1549 | 1.1  |
| IPI00026689.4 | 983 CDC2      | K.IGEGT*Y  | 0.966676636 | 0.98 T14   | 1.03 |
| IPI00026689.4 | 983 CDC2      | R.VY*THE'  | 0.253322457 | 1 Y166     | 1.13 |
| IPI00026689.4 | 983 CDC2      | R.VYT*HE'  | 0.214968943 | 1 T167     | 1.13 |
| IPI00026836.2 | 4137 MAPT     | R.SGYSSF   | 0.214968943 | 0.58 T147  | 0.86 |
| IPI00026836.2 | 4137 MAPT     | K.AKTDHC   | 0.643675939 | 0.94 S338  | 1.01 |
| IPI00026836.2 | 4137 MAPT     | K.AKTDHC   | 0.27446972  | 0.94 S338  | 1.01 |
| IPI00026836.2 | 4137 MAPT     | K.AKTDHC   | 0.096924105 | 0.94 Y336  | 1.26 |
| IPI00026836.2 | 4137 MAPT     | R.TPSLPT   | 0.32093792  | 0.81 T162  | 0.89 |
| IPI00026836.2 | 4137 MAPT     | R.TPSLPT'  | 0.32093792  | 0.81 T159  | 0.89 |
| IPI00026836.2 | 4137 MAPT     | K.TDHGAE   | 0.32093792  | 0.98 Y336  | 1.16 |
| IPI00026952.1 | 11187 PKP3    | R.TLQRLS   | 0.253322457 | 1 S314     | 1.09 |
| IPI00026952.1 | 11187 PKP3    | R.TLQRLS   | 0.27446972  | 0.98 S313  | 1.09 |
| IPI00026952.1 | 11187 PKP3    | R.LS*SGFI  | 0.346340474 | 1 S313     | 1.08 |
| IPI00026952.1 | 11187 PKP3    | R.LSS*GFI  | 0.346340474 | 1 S314     | 1.08 |
| IPI00027009.2 | 11252 PACSIN2 | K.KATDGV   | 0.096924105 | 0.94 S375  | 1.12 |
| IPI00027009.2 | 11252 PACSIN2 | K.KATDGV   | 0.530774648 | 0.83 S375  | 0.91 |
| IPI00027009.2 | 11252 PACSIN2 | K.ATDGV    | 0.233505398 | 0.83 S354  | 1    |

|               |                |           |             |            |      |
|---------------|----------------|-----------|-------------|------------|------|
| IPI00027035.1 | 11321 XAB1     | K.DSLS*PA | 0.054409842 | 0.96 S314  | 1.1  |
| IPI00027035.1 | 11321 XAB1     | K.DS*LSP  | 0.054409842 | 0.96 S312  | 1.1  |
| IPI00027082.1 | 29924 EPN1     | R.TALPTS  | 0.782390145 | 0.92 S435  | 1.03 |
| IPI00027157.1 | 1063 CENPF     | K.SVPVNM  | 0.813530126 | 0.86 S3175 | 1    |
| IPI00027157.1 | 1063 CENPF     | K.VAQRS*  | 0.886608864 | 0.98 S3150 | 0.97 |
| IPI00027157.1 | 1063 CENPF     | K.LALS*PL | 0.566916624 | 0.96 S3119 | 1.06 |
| IPI00027202.2 | 7544 ZFY       | R.IHT*GEK | 0.373234869 | 0.96 T567  | 0.99 |
| IPI00027258.3 | 11346 SYNPO    | R.SPLPAG  | 0.32797409  | 0.86 S837  | 1.04 |
| IPI00027258.3 | 11346 SYNPO    | R.AAS*PAI | 0.463105648 | 0.98 S589  | 0.98 |
| IPI00027258.3 | 11346 SYNPO    | R.RSPTDS  | 0.152571688 | 0.92 S871  | 1.11 |
| IPI00027258.3 | 11346 SYNPO    | R.AAS*PAI | 0.080258071 | 0.94 S589  | 1.16 |
| IPI00027258.3 | 11346 SYNPO    | R.PSLFVL  | 0.197661257 | 0.98 S575  | 1.14 |
| IPI00027258.3 | 11346 SYNPO    | K.S*PGILG | 0.373234869 | 0.98 S871  | 1.26 |
| IPI00027258.3 | 11346 SYNPO    | R.CPS*PTI | 0.463105648 | 0.92 S510  | 1.06 |
| IPI00027258.3 | 11346 SYNPO    | R.ASPAAA  | 0.253322457 | 0.86 S458  | 0.92 |
| IPI00027258.3 | 11346 SYNPO    | R.CPSPT*I | 0.27446972  | 0.83 T512  | 1.11 |
| IPI00027258.3 | 11346 SYNPO    | R.S*PPSY  | 0.782390145 | 0.98 S336  | 0.92 |
| IPI00027258.3 | 11346 SYNPO    | R.DRAS*P  | 0.296993866 | 0.98 S441  | 1.11 |
| IPI00027258.3 | 11346 SYNPO    | R.SAGAEN  | 0.214968943 | 1 S784     | 1.14 |
| IPI00027726.1 | 51274 KLF3     | R.RAS*PG  | 0.253322457 | 1 S92      | 1.09 |
| IPI00027726.1 | 51274 KLF3     | R.TDYYPE  | 0.463105648 | 0.94 S216  | 1.02 |
| IPI00027726.1 | 51274 KLF3     | K.RPLPVE  | 0.431601138 | 0.94 S250  | 1.11 |
| IPI00027729.1 | 1454 CSNK1E    | R.IPASQT  | 0.980510506 | 0.88 S408  | 1.27 |
| IPI00027798.1 | 83640 FAM103A1 | K.RPPES*I | 0.12765804  | 0.12 S36   | 0.05 |
| IPI00028005.1 | 57122 NUP107   | R.SGFGEI  | 0.373234869 | 0.98 S11   | 1.14 |
| IPI00028065.1 | 4690 NCK1      | K.RKPS*VI | 0.12765804  | 0.92 S85   | 1.44 |
| IPI00028122.1 | 11168 PSIP1    | K.KKPSS*I | 0.49616549  | 0.96 S514  | 1.06 |
| IPI00028122.1 | 11168 PSIP1    | K.KKPSSE  | 0.431601138 | 0.96 T519  | 0.96 |
| IPI00028276.4 | 85451 UNK      | R.NSSLGS  | 0.296993866 | 0.98 S461  | 1.2  |
| IPI00028307.2 | 63893 UBE2O    | K.NMTVEC  | 0.233505398 | 0.98 S289  | 1.11 |
| IPI00028307.2 | 63893 UBE2O    | R.KEDKPE  | 0.166517367 | 0.88 S346  | 1.11 |
| IPI00028307.2 | 63893 UBE2O    | K.NMTVEC  | 0.643675939 | 0.96 T291  | 1    |
| IPI00028307.2 | 63893 UBE2O    | K.NMTVEC  | 0.632655857 | 0.94 S286  | 0.92 |
| IPI00028416.1 | 5089 PBX2      | R.HSMGPG  | 0.054409842 | 0.88 S395  | 1.26 |
| IPI00028416.1 | 5089 PBX2      | K.TAVSVT  | 0.001613065 | 0.96 S330  | 1.56 |
| IPI00028416.1 | 5089 PBX2      | K.GGGSAA  | 0.049260986 | 1 S151     | 1.32 |
| IPI00028566.1 | 9891 NUA1      | R.TGVLLP  | 0.152571688 | 0.94 S455  | 1.13 |
| IPI00028566.1 | 9891 NUA1      | R.TGVLLP  | 0.024009318 | 0.69 S445  | 1.12 |
| IPI00028954.1 | 8888 MCM3AP    | K.KPGDGE  | 0.684201094 | 0.92 S538  | 0.95 |
| IPI00028954.1 | 8888 MCM3AP    | R.TGASSL  | 0.684201094 | 1 S557     | 1.02 |
| IPI00028954.1 | 8888 MCM3AP    | K.EKKPGE  | 0.166517367 | 0.92 S529  | 1.11 |
| IPI00028954.1 | 8888 MCM3AP    | K.KPGDGE  | 0.9240167   | 0.81 S527  | 1    |
| IPI00028954.1 | 8888 MCM3AP    | K.EKKPGE  | 0.233505398 | 0.96 S527  | 1.03 |
| IPI00028955.4 | 23246 BOP1     | K.LALPGH  | 0.181528891 | 0.92 S323  | 1.16 |
| IPI00028955.4 | 23246 BOP1     | R.IGDEYA  | 0.116581414 | 0.71 S126  | 1.16 |
| IPI00029009.3 | 23396 PIP5K1C  | K.AAPTEV  | 0.001806639 | 0.9 T47    | 0.79 |
| IPI00029079.5 | 8833 GMPS      | K.VINAAS  | 0.40669332  | 0.92 T318  | 1.19 |
| IPI00029081.2 | 3980 LIG3      | K.FSGFSA  | 0.373234869 | 0.94 S241  | 0.93 |
| IPI00029081.2 | 3980 LIG3      | K.LTTTGQ  | 0.566916624 | 0.96 S216  | 1    |
| IPI00029081.2 | 3980 LIG3      | K.LTTTGQ  | 0.684201094 | 0.98 S210  | 1.02 |
| IPI00029081.2 | 3980 LIG3      | K.LTTTGQ  | 0.566916624 | 0.98 T209  | 1.02 |

|               |                |           |             |      |       |       |
|---------------|----------------|-----------|-------------|------|-------|-------|
| IPI00029081.2 | 3980 LIG3      | K.FSGFSA  | 0.726073545 | 0.98 | S242  | 1.13  |
| IPI00029081.2 | 3980 LIG3      | K.LTTTGQ  | 0.401648339 | 1    | S210  | 1.08  |
| IPI00029111.2 | 1809 DPYSL3    | R.GMYDG   | 0.017448313 | 0.94 | T623  | 1.04  |
| IPI00029174.3 | 60436 TGIF2    | R.GELES*I | 0.32093792  | 0.98 | S153  | 1.17  |
| IPI00029174.3 | 60436 TGIF2    | R.GELESP  | 0.233505398 | 0.98 | T159  | 1.17  |
| IPI00029422.1 | 10112 KIF20A   | R.QQS*VA  | 0           | 0.67 | S662  | 5.47  |
| IPI00029422.1 | 10112 KIF20A   | K.EHSLQV  | 0.961160996 | 0.98 | S532  | 0.93  |
| IPI00029629.3 | 7706 TRIM25    | R.AS*APSI | 0.356956072 | 0.64 | S97   | 0.95  |
| IPI00029629.3 | 7706 TRIM25    | R.ASAPS*I | 0.858914691 | 0.64 | S100  | 0.95  |
| IPI00029661.2 | 7813 EVI5      | R.RNSGS   | 0.233505398 | 0.74 | S128  | 0.95  |
| IPI00029661.2 | 7813 EVI5      | R.RNS*GS  | 0.530774648 | 0.92 | S113  | 0.84  |
| IPI00029661.2 | 7813 EVI5      | R.RNSGS   | 0.530774648 | 0.92 | S116  | 0.84  |
| IPI00029661.2 | 7813 EVI5      | R.RNSGS*  | 0.530774648 | 0.92 | S115  | 0.84  |
| IPI00029734.1 | 994 CDC25B     | R.LTHLS*L | 0.181528891 | 0.98 | S75   | 1.11  |
| IPI00029734.1 | 994 CDC25B     | R.SKS*LCI | 3.14E-06    | 0.4  | S396  | 0.95  |
| IPI00030099.2 | 115 ADCY9      | R.VIPQHQ  | 0.253322457 | 0.98 | S1259 | 1.18  |
| IPI00030136.1 | 4926 NUMA1     | K.RVS*LEF | 0.401648339 | 0.92 | S855  | 1.11  |
| IPI00030136.1 | 4926 NUMA1     | R.RAS*MC  | 0.253322457 | 0.96 | S833  | 1.14  |
| IPI00030136.1 | 4926 NUMA1     | K.APVPST  | 0.726073545 | 0.9  | S169  | 0.82  |
| IPI00030136.1 | 4926 NUMA1     | K.APVPST  | 0.643675939 | 0.9  | S172  | 0.82  |
| IPI00030136.1 | 4926 NUMA1     | R.VSLEPH  | 0.463105648 | 1    | T864  | 1.06  |
| IPI00030246.1 | 5783 PTPN13    | R.S*STSD  | 0.373234869 | 0.9  | S214  | 0.89  |
| IPI00030246.1 | 5783 PTPN13    | K.RWS*IV  | 0.463105648 | 0.96 | S1082 | 1.04  |
| IPI00030246.1 | 5783 PTPN13    | K.RLSCS*I | 0.604563646 | 0.94 | S938  | 0.98  |
| IPI00030246.1 | 5783 PTPN13    | K.RLS*CSI | 0.604563646 | 0.94 | S936  | 0.98  |
| IPI00030246.1 | 5783 PTPN13    | K.T*FSSSF | 0.877341226 | 0.94 | T1355 | 0.89  |
| IPI00030246.1 | 5783 PTPN13    | K.TFSS*SF | 0.995403769 | 0.94 | S1358 | 0.94  |
| IPI00030274.4 | 84081 CCDC55   | K.TQQLHF  | 0.197661257 | 0.96 | S27   | 1.1   |
| IPI00030399.1 | 663 BNIP2      | R.KGS*ITE | 0.530774648 | 0.77 | S114  | 1.04  |
| IPI00030408.2 | 54737 HSMPP8   | R.AGQDM   | 0.029596689 | 0.71 | S319  | 1.26  |
| IPI00030408.2 | 54737 HSMPP8   | K.GYTS*D  | 0.27446972  | 0.98 | S85   | 1.2   |
| IPI00030408.2 | 54737 HSMPP8   | K.GYT*SD  | 0.27446972  | 0.98 | T84   | 1.2   |
| IPI00030466.4 | 26115 TANC2    | R.TWAVS   | 0.017448313 | 0.88 | S1802 | 1.33  |
| IPI00030466.4 | 26115 TANC2    | R.ELPLTQ  | 0.080258071 | 0.98 | T344  | 1.25  |
| IPI00030466.4 | 26115 TANC2    | R.SCDELS  | 0.214968943 | 0.9  | T1739 | 1.38  |
| IPI00030466.4 | 26115 TANC2    | R.SCDELS  | 0.214968943 | 0.9  | S1737 | 1.38  |
| IPI00030466.4 | 26115 TANC2    | K.DCSYGA  | 0.072926818 | 0.96 | S79   | 1.1   |
| IPI00030466.4 | 26115 TANC2    | R.DSAYIS  | 0.431601138 | 0.98 | S1368 | 1.11  |
| IPI00030466.4 | 26115 TANC2    | R.DSAYIS  | 0.373234869 | 0.98 | S1372 | 1.11  |
| IPI00030466.4 | 26115 TANC2    | R.DSAYIS  | 0.096924105 | 1    | S1367 | 1.21  |
| IPI00030654.1 | 11052 CPSF6    | R.EMDTAF  | 0.463105648 | 0.92 | T444  | 1.11  |
| IPI00030790.7 | 23247 KIAA0556 | R.KDS*LS  | 0           | 0.83 | S691  | 3.85  |
| IPI00030820.1 | 57129 MRPL47   | R.ASAFLK  | 0           | 0.52 | S22   | 10.04 |
| IPI00030851.1 | 10427 SEC24B   | R.T*PPTA  | 0.239994114 | 0.94 | T329  | 0.87  |
| IPI00030915.1 | 9101 USP8      | R.STKPVV  | 0.643675939 | 0.9  | S452  | 1.05  |
| IPI00030915.1 | 9101 USP8      | R.STKPVV  | 0.643675939 | 0.9  | T454  | 1.05  |
| IPI00030915.1 | 9101 USP8      | R.SYS*SPI | 0.152571688 | 0.98 | S718  | 1.21  |
| IPI00031392.1 | 79092 CARD14   | R.SS*SPAI | 0.566916624 | 0.96 | S237  | 1.38  |
| IPI00031411.2 | 2195 FAT       | R.VQVLDT  | 0.89791754  | 0.98 | S150  | 0.95  |
| IPI00031411.2 | 2195 FAT       | R.VQVLDT  | 0.89791754  | 0.98 | T152  | 0.95  |
| IPI00031411.2 | 2195 FAT       | R.VQVLDT  | 0.604563646 | 0.96 | S153  | 0.96  |

|               |               |           |             |            |      |
|---------------|---------------|-----------|-------------|------------|------|
| IPI00031508.1 | 1659 DHX8     | R.NPDRPT  | 0.054409842 | 0.85 S385  | 1    |
| IPI00031605.1 | 79026 AHNAK   | K.LQGSGV  | 0.01942062  | 0.96 S2927 | 1.31 |
| IPI00031605.1 | 79026 AHNAK   | K.FGTFGC  | 0.233505398 | 0.9 S2900  | 0.99 |
| IPI00031605.1 | 79026 AHNAK   | R.KGDRSF  | 0.463105648 | 0.9 T102   | 1.09 |
| IPI00031605.1 | 79026 AHNAK   | K.MYFPDV  | 0.401648339 | 0.94 S2169 | 1.09 |
| IPI00031605.1 | 79026 AHNAK   | K.GKGGV   | 0.296993866 | 1 S2801    | 1.13 |
| IPI00031605.1 | 79026 AHNAK   | R.IS*APNV | 0.431601138 | 0.98 S2518 | 1.18 |
| IPI00031605.1 | 79026 AHNAK   | K.FKAEAP  | 0.296993866 | 1 S2180    | 1.2  |
| IPI00031627.2 | 5430 POLR2A   | K.YSPTS*F | 0.604563646 | 0.98 S1871 | 1.02 |
| IPI00031627.2 | 5430 POLR2A   | K.YSPTS*F | 0.604563646 | 0.98 S1871 | 1.02 |
| IPI00031627.2 | 5430 POLR2A   | K.YSPTSP  | 0.044561326 | 0.86 Y1895 | 1.13 |
| IPI00031627.2 | 5430 POLR2A   | K.YSPTS*F | 0.401648339 | 0.96 S1892 | 1.04 |
| IPI00031627.2 | 5430 POLR2A   | K.YSPTSP  | 0.401648339 | 0.96 T1894 | 1.04 |
| IPI00031627.2 | 5430 POLR2A   | K.YSPTSP  | 0.096924105 | 0.96 T1905 | 1    |
| IPI00031627.2 | 5430 POLR2A   | K.YSPT*SF | 0.868109485 | 0.86 T1891 | 1.03 |
| IPI00031627.2 | 5430 POLR2A   | K.YSPTS*F | 0.868109485 | 0.86 S1892 | 1.03 |
| IPI00031627.2 | 5430 POLR2A   | K.YSPTS*F | 0.467835816 | 0.83 S1913 | 0.82 |
| IPI00031627.2 | 5430 POLR2A   | K.YSPTS*F | 0.14531114  | 0.81 S1878 | 1    |
| IPI00031675.5 | 84315 MON1A   | R.AES*PTI | 0.044561326 | 0.79 S31   | 1.02 |
| IPI00031681.1 | 1017 CDK2     | K.IGEGT*Y | 0.966676636 | 0.98 T14   | 1.03 |
| IPI00031681.1 | 1017 CDK2     | R.T*YTHE\ | 0.088241621 | 1 T158     | 1.24 |
| IPI00031681.1 | 1017 CDK2     | R.TY*THE\ | 0.152571688 | 1 Y159     | 1.24 |
| IPI00031681.1 | 1017 CDK2     | R.TYT*HE\ | 0.116581414 | 1 T160     | 1.22 |
| IPI00031696.2 | 79072 FASTKD3 | K.LETFT*F | 0.001622925 | 0.77 T252  | 0.49 |
| IPI00031698.3 | 79074 C2orf49 | K.SPSPGV  | 2.14E-05    | 0.85 S189  | 1.2  |
| IPI00031698.3 | 79074 C2orf49 | R.KLSNSS  | 0.373234869 | 1 S147     | 1.08 |
| IPI00031698.3 | 79074 C2orf49 | R.KLS*NS  | 0.32093792  | 1 S143     | 1.08 |
| IPI00031698.3 | 79074 C2orf49 | R.KLSNSS  | 0.530774648 | 0.98 S148  | 1.07 |
| IPI00031698.3 | 79074 C2orf49 | R.KLSNSS  | 0.956313787 | 0.85 S150  | 1.08 |
| IPI00031698.3 | 79074 C2orf49 | R.KLSNS*  | 0.346340474 | 1 S145     | 1.11 |
| IPI00031768.1 | 84376 HOOK3   | R.S*YPGH  | 0.27446972  | 1 S707     | 1.12 |
| IPI00031768.1 | 84376 HOOK3   | R.SY*PGH  | 0.27446972  | 1 Y708     | 1.12 |
| IPI00032003.1 | 2010 EMD      | R.RLSPPS  | 0.296993866 | 0.86 S52   | 0.86 |
| IPI00032003.1 | 2010 EMD      | R.RLSPPS  | 0.296993866 | 0.86 S54   | 0.86 |
| IPI00032003.1 | 2010 EMD      | R.RLSPPS  | 0.346340474 | 1 S54      | 1.1  |
| IPI00032003.1 | 2010 EMD      | R.RLSPPS  | 0.566916624 | 1 S52      | 1.05 |
| IPI00032003.1 | 2010 EMD      | R.RLS*PP  | 0.463105648 | 1 S49      | 1.05 |
| IPI00032003.1 | 2010 EMD      | R.RLSPPS  | 0.431601138 | 1 S57      | 1.07 |
| IPI00032003.1 | 2010 EMD      | R.DSAYQE  | 0.166517367 | 0.98 S171  | 1.16 |
| IPI00032003.1 | 2010 EMD      | R.DSAYQE  | 0.106353987 | 0.98 S173  | 1.16 |
| IPI00032342.3 | 9320 TRIP12   | K.HLAESE  | 0.791231585 | 0.98 S990  | 1.05 |
| IPI00032342.3 | 9320 TRIP12   | K.RSES*PI | 0.401648339 | 1 S354     | 1.07 |
| IPI00032342.3 | 9320 TRIP12   | R.SES*PP  | 0.346340474 | 0.98 S354  | 1.03 |
| IPI00032491.1 | 23592 LEMD3   | K.APPAPL  | 0.684201094 | 0.85 S187  | 0.88 |
| IPI00032491.1 | 23592 LEMD3   | K.TNNHIG  | 0.684201094 | 0.92 S402  | 0.97 |
| IPI00032491.1 | 23592 LEMD3   | R.YGLS*P  | 0.530774648 | 1 S27      | 1    |
| IPI00032677.1 | 170463 SSBP4  | K.SSPGAV  | 0.066203153 | 0.98 T333  | 1.38 |
| IPI00032677.1 | 170463 SSBP4  | K.S*SPGA' | 0.216960964 | 0.9 S319   | 1.21 |
| IPI00032677.1 | 170463 SSBP4  | K.SS*PGA' | 0.216960964 | 0.9 S320   | 1.21 |
| IPI00032791.4 | 10775 POP4    | K.SVIYHAL | 9.73E-05    | 0.96 S10   | 1.34 |
| IPI00032898.1 | 55509 SNFT    | R.SVAAPC  | 0.096924105 | 0.98 S31   | 1.12 |

|               |        |          |           |             |      |       |      |
|---------------|--------|----------|-----------|-------------|------|-------|------|
| IPI00032936.4 | 2077   | ERF      | K.TPADTG  | 0.214968943 | 0.85 | S20   | 1.03 |
| IPI00032936.4 | 2077   | ERF      | -.MKT*PAC | 0.373234869 | 0.98 | T3    | 1.02 |
| IPI00032936.4 | 2077   | ERF      | -.MKT*PAC | 0.373234869 | 0.98 | T3    | 1.02 |
| IPI00032936.4 | 2077   | ERF      | K.TPADTG  | 0.296993866 | 1    | S21   | 1.11 |
| IPI00032970.2 | 114885 | OSBPL11  | K.S*RSFSI | 0.732417704 | 0.83 | S170  | 1.24 |
| IPI00032970.2 | 114885 | OSBPL11  | R.S*FSLAS | 0.49616549  | 0.74 | S172  | 1.31 |
| IPI00032970.2 | 114885 | OSBPL11  | R.SFSLAS  | 0.9240167   | 0.96 | S179  | 1.2  |
| IPI00032970.2 | 114885 | OSBPL11  | R.SFSLAS  | 0.9240167   | 0.96 | S181  | 1.2  |
| IPI00032970.2 | 114885 | OSBPL11  | K.SRSFSL  | 0           | 0.94 | S179  | 0.06 |
| IPI00032970.2 | 114885 | OSBPL11  | K.SRS*FSI | 0           | 0.94 | S172  | 0.06 |
| IPI00032970.2 | 114885 | OSBPL11  | R.S*FSLAS | 0.614059792 | 0.85 | S172  | 0.91 |
| IPI00032970.2 | 114885 | OSBPL11  | R.SFS*LAS | 0.614059792 | 0.85 | S174  | 0.91 |
| IPI00032971.2 | 114884 | OSBPL10  | R.AKS*QY  | 0.49616549  | 0.9  | S232  | 1.2  |
| IPI00033008.1 | 2353   | FOS      | R.KGS*SS  | 5.89E-05    | 0.79 | S362  | 1.1  |
| IPI00033008.1 | 2353   | FOS      | R.KGS*SS  | 0.824668282 | 0.86 | S362  | 0.9  |
| IPI00033054.3 | 51496  | CTDSPL2  | K.RKY*SE' | 0.296993866 | 0.9  | Y27   | 1.15 |
| IPI00033054.3 | 51496  | CTDSPL2  | R.TTLLGTI | 0.530774648 | 0.92 | S163  | 1.1  |
| IPI00033054.3 | 51496  | CTDSPL2  | R.TTLLGTI | 0.530774648 | 0.92 | S165  | 1.1  |
| IPI00033054.3 | 51496  | CTDSPL2  | K.RKYSEV  | 0.072926818 | 0.98 | S36   | 1.12 |
| IPI00033075.2 | 7920   | BAT5     | R.APASVP  | 0.738886535 | 0.72 | T32   | 0.91 |
| IPI00033153.1 | 10482  | NXF1     | R.AFAMPA  | 0.401648339 | 0.98 | S558  | 1.09 |
| IPI00033153.1 | 10482  | NXF1     | R.AFAMPA  | 0.49616549  | 0.98 | S556  | 1.1  |
| IPI00033153.1 | 10482  | NXF1     | R.AFAMPA  | 0.49616549  | 0.98 | S557  | 1.1  |
| IPI00033494.3 | 103910 | MRLC2    | R.AT*SNVI | 0.024009318 | 0.81 | T19   | 0.98 |
| IPI00033494.3 | 103910 | MRLC2    | R.ATS*NVI | 0.024009318 | 0.81 | S20   | 0.98 |
| IPI00033907.1 | 64682  | ANAPC1   | R.AHS*PA  | 0.886608864 | 0.92 | S355  | 1.07 |
| IPI00033907.1 | 64682  | ANAPC1   | R.FNISSHI | 0.643675939 | 0.98 | S377  | 0.98 |
| IPI00033907.1 | 64682  | ANAPC1   | K.LHDS*L\ | 0.933447376 | 0.96 | S569  | 1.13 |
| IPI00033907.1 | 64682  | ANAPC1   | R.NFD FEC | 0.335099417 | 0.74 | S688  | 0.88 |
| IPI00034006.1 | 25930  | PTPN23   | R.GAAAAL  | 0.795669231 | 0.98 | S1126 | 0.97 |
| IPI00034248.1 | 23598  | PATZ1    | K.LSHS*GI | 0.9949766   | 0.96 | S378  | 0.87 |
| IPI00036742.5 | 25962  | KIAA1429 | R.FFT*PP/ | 0.956313787 | 0.86 | T1708 | 0.82 |
| IPI00036742.5 | 25962  | KIAA1429 | R.GPRT*P  | 0.49616549  | 0.66 | T184  | 0.67 |
| IPI00036742.5 | 25962  | KIAA1429 | R.GPRT*P  | 0.152571688 | 0.92 | T184  | 1.16 |
| IPI00036742.5 | 25962  | KIAA1429 | R.GPRT*P  | 0.32093792  | 0.98 | T184  | 1.17 |
| IPI00036742.5 | 25962  | KIAA1429 | R.SFLSEP  | 0.296993866 | 0.98 | S1579 | 1.14 |
| IPI00038698.1 |        |          | K.LIPITGG | 0.431601138 | 1    | S531  | 1.1  |
| IPI00043327.3 | 146705 | C17orf56 | R.HFEASC  | 0.604563646 | 1    | S356  | 1.04 |
| IPI00043494.6 | 197407 | ZNF553   | R.VHT*GE  | 0.995403769 | 0.01 | T326  | 0.2  |
| IPI00043565.3 | 91603  | CCDC16   | K.KEEENA  | 0.643675939 | 0.9  | S351  | 0.95 |
| IPI00044665.1 | 150864 | ALS2CR13 | K.YAT*SPH | 0.541395815 | 0.96 | T456  | 0.92 |
| IPI00044665.1 | 150864 | ALS2CR13 | K.Y*ATSPH | 0.541395815 | 0.96 | Y454  | 0.92 |
| IPI00044665.1 | 150864 | ALS2CR13 | R.TSS*LDI | 0.152571688 | 0.98 | S220  | 1.19 |
| IPI00044665.1 | 150864 | ALS2CR13 | R.T*SSLDI | 0.152571688 | 0.98 | T218  | 1.19 |
| IPI00044665.1 | 150864 | ALS2CR13 | R.TS*SLDI | 0.152571688 | 0.98 | S219  | 1.19 |
| IPI00045051.2 | 5814   | PURB     | R.DSLGDF  | 0.9240167   | 0.59 | S101  | 0.55 |
| IPI00045207.1 | 112939 | BTBD14B  | K.VSSPSC  | 0.849082022 | 0.94 | S145  | 0.85 |
| IPI00045207.1 | 112939 | BTBD14B  | K.VSSPSC  | 3.32E-09    | 0.88 | S140  | 2.72 |
| IPI00045360.1 | 23152  | CIC      | K.S*SSEAI | 0.431601138 | 0.98 | S277  | 1.14 |
| IPI00045360.1 | 23152  | CIC      | K.SS*SEAI | 0.431601138 | 0.98 | S278  | 1.14 |
| IPI00045360.1 | 23152  | CIC      | R.VPGGSF  | 0.139636808 | 0.9  | S726  | 0.98 |



|               |                |           |             |            |      |
|---------------|----------------|-----------|-------------|------------|------|
| IPI00045360.1 | 23152 CIC      | R.VPGGS*  | 0.139636808 | 0.9 S721   | 0.98 |
| IPI00045360.1 | 23152 CIC      | R.FAELPE  | 0.166517367 | 0.9 S1382  | 1.13 |
| IPI00045360.1 | 23152 CIC      | R.FAELPE  | 0.431601138 | 0.96 S1373 | 1.08 |
| IPI00045360.1 | 23152 CIC      | R.AFSHSC  | 0.116581414 | 0.98 S370  | 1.12 |
| IPI00045472.1 | 84219 WDR24    | R.HEIVDT' | 0.459466751 | 0.79 T711  | 0.59 |
| IPI00045531.1 | 388695 LYSMD1  | R.ARS*YG  | 0.03282354  | 0.9 S23    | 1.41 |
| IPI00045914.1 | 23013 SPEN     | R.LLSVKG  | 0.530774648 | 0.96 S1287 | 0.93 |
| IPI00045914.1 | 23013 SPEN     | K.DS*ELK  | 0.373234869 | 0.81 S1629 | 1.04 |
| IPI00045914.1 | 23013 SPEN     | R.LNTVAS  | 0.643675939 | 0.92 S1062 | 1.03 |
| IPI00045914.1 | 23013 SPEN     | R.LNT*VA  | 0.643675939 | 0.92 T1059 | 1.03 |
| IPI00045914.1 | 23013 SPEN     | R.SKT*PV  | 8.30E-09    | 0.61 T1826 | 0.24 |
| IPI00045914.1 | 23013 SPEN     | R.SVYATM  | 0.9949766   | 0.92 S1918 | 1.09 |
| IPI00045914.1 | 23013 SPEN     | R.SLVHEV  | 0.566916624 | 1 S1222    | 1.05 |
| IPI00056880.6 | 126208 ZNF787  | R.IHTGEKI | 0.623338592 | 0.96 T151  | 0.87 |
| IPI00056880.6 | 126208 ZNF787  | R.IHT*GEK | 0.623338592 | 0.96 T145  | 0.87 |
| IPI00056880.6 | 126208 ZNF787  | R.IHT*GEK | 0.756570768 | 0.98 T117  | 0.92 |
| IPI00059764.3 | 126299 ZNF428  | R.SPLGEA  | 0.283672925 | 0.86 T108  | 0.7  |
| IPI00061078.5 |                | R.SVS*VD  | 0.559279862 | 0.85 S499  | 1.08 |
| IPI00061087.3 | 116224 FAM122A | R.RNS*TTI | 0.060044376 | 0.92 S62   | 1.32 |
| IPI00061087.3 | 116224 FAM122A | R.SNSAPL  | 0.040276449 | 0.98 T47   | 1.39 |
| IPI00061087.3 | 116224 FAM122A | K.RIDFIPV | 0.116581414 | 1 S143     | 1.33 |
| IPI00061087.3 | 116224 FAM122A | K.RIDFIPV | 0.049260986 | 1 S143     | 1.33 |
| IPI00061087.3 | 116224 FAM122A | R.S*NSAP  | 0.066203153 | 1 S35      | 1.29 |
| IPI00061107.3 |                | K.GLGLGA  | 0.197661257 | 0.94 T216  | 1.15 |
| IPI00061178.1 | 56267 CCBL2    | R.DRDYSL  | 0.530774648 | 0.37 S277  | 0.84 |
| IPI00061178.1 | 56267 CCBL2    | R.RDVYLS  | 0.12765804  | 1 S208     | 1.3  |
| IPI00061178.1 | 56267 CCBL2    | R.DYGHS*  | 0.214968943 | 0.96 S249  | 1.32 |
| IPI00061178.1 | 56267 CCBL2    | R.DYGHS   | 0.12765804  | 0.96 S250  | 1.32 |
| IPI00061178.1 | 56267 CCBL2    | R.DVYLS*I | 0.022266161 | 0.79 S208  | 0.46 |
| IPI00061282.1 | 5562 PRKAA1    | K.IADFGL  | 0.530774648 | 0.71 T198  | 0.94 |
| IPI00061282.1 | 5562 PRKAA1    | K.IADFGL  | 0.791231585 | 0.79 S199  | 1.04 |
| IPI00061282.1 | 5562 PRKAA1    | R.VPFLVA  | 0.941751315 | 0.94 T397  | 0.98 |
| IPI00061282.1 | 5562 PRKAA1    | K.DFYLAT  | 0.296993866 | 0.88 S375  | 1.03 |
| IPI00061356.1 | 54908 CCDC99   | K.SVSIHT* | 0.005157186 | 0.92 T509  | 1.56 |
| IPI00061989.3 | 113130 CDCA5   | K.PWAPDM  | 0.27446972  | 0.66 S209  | 0.89 |
| IPI00061989.3 | 113130 CDCA5   | R.LETLGS  | 0.231191204 | 0.98 T159  | 0.93 |
| IPI00061989.3 | 113130 CDCA5   | R.LETLGS  | 0.231191204 | 0.98 S158  | 0.93 |
| IPI00061989.3 | 113130 CDCA5   | R.KS*GSE  | 0.684201094 | 0.96 S33   | 0.99 |
| IPI00061989.3 | 113130 CDCA5   | K.S*GSELI | 0.643675939 | 0.92 S33   | 0.95 |
| IPI00061989.3 | 113130 CDCA5   | R.IVAHAVI | 0.214968943 | 1 S75      | 1.15 |
| IPI00062697.1 | 91283 C9orf30  | R.SVS*PLI | 0.566916624 | 1 S98      | 1.04 |
| IPI00062697.1 | 91283 C9orf30  | K.EWPVSE  | 0.643675939 | 0.86 S274  | 1.04 |
| IPI00062884.3 | 2017 CTTN      | R.AKTQT*I | 0.214968943 | 0.98 T364  | 1.17 |
| IPI00062884.3 | 2017 CTTN      | R.AKT*QTI | 0.296993866 | 0.98 T362  | 1.18 |
| IPI00062884.3 | 2017 CTTN      | R.AKT*QTI | 0.088241621 | 0.79 T362  | 1.14 |
| IPI00062884.3 | 2017 CTTN      | K.TQTTPV  | 0.181528891 | 0.96 S381  | 1.11 |
| IPI00062884.3 | 2017 CTTN      | K.TQTTPV  | 0.116581414 | 0.96 S380  | 1.11 |
| IPI00062884.3 | 2017 CTTN      | R.LPSS*P  | 0.604563646 | 0.88 S381  | 0.96 |
| IPI00062884.3 | 2017 CTTN      | K.TQT*PP  | 0.139636808 | 0.98 T364  | 1.2  |
| IPI00062884.3 | 2017 CTTN      | K.TQTTPV  | 0.27446972  | 1 Y384     | 1.15 |
| IPI00062884.3 | 2017 CTTN      | K.TQT*PP  | 0.463105648 | 1 T364     | 1.1  |

|               |                 |           |             |            |      |
|---------------|-----------------|-----------|-------------|------------|------|
| IPI00062884.3 | 2017 CTTN       | R.AKTQT*I | 0.566916624 | 1 T364     | 1.03 |
| IPI00063387.3 | 29844 TFPT      | R.TPAPPE  | 0.181528891 | 0.98 S180  | 1.21 |
| IPI00063605.3 | 84962 JUB       | R.SSFASS  | 0.760488858 | 0.98 S137  | 1.07 |
| IPI00063605.3 | 84962 JUB       | R.SSFASS  | 0.760488858 | 0.98 S130  | 1.07 |
| IPI00063605.3 | 84962 JUB       | R.SSFASS  | 0.760488858 | 0.98 S136  | 1.07 |
| IPI00064086.4 | 1936 EEF1D      | K.KPAT*P/ | 0.303680857 | 0.92 T123  | 1.17 |
| IPI00064086.4 | 1936 EEF1D      | K.KPATPA  | 0.643675939 | 0.9 S138   | 1.06 |
| IPI00064086.4 | 1936 EEF1D      | K.KPATPA  | 0.346340474 | 0.92 S138  | 0.93 |
| IPI00064086.4 | 1936 EEF1D      | R.ATAPQT  | 0.401648339 | 1 S109     | 1.11 |
| IPI00066458.1 | 81669 CCNL2     | K.AKADS*I | 0.009053635 | 0.86 S369  | 1.08 |
| IPI00066458.1 | 81669 CCNL2     | R.GLLPGC  | 0.809048575 | 0.96 S330  | 0.87 |
| IPI00066458.1 | 81669 CCNL2     | K.GSKPS*  | 0.431601138 | 1 S348     | 1.04 |
| IPI00066641.3 |                 | K.DRPAS*  | 0.643675939 | 0.92 S707  | 1.11 |
| IPI00066641.3 |                 | K.DRPASC  | 0.643675939 | 0.92 S709  | 1.11 |
| IPI00066641.3 |                 | K.IERPGEI | 0.3495912   | 0.85 S287  | 0.66 |
| IPI00069126.1 | 4646 MYO6       | K.GT*VIKV | 0.106353987 | 0.98 T405  | 1.23 |
| IPI00069126.1 | 4646 MYO6       | R.IDGLVK\ | 0.104720341 | 1 T845     | 0.69 |
| IPI00069267.2 | 94104 C21orf66  | K.MADHLE  | 0.373234869 | 0.58 S557  | 0.69 |
| IPI00069309.4 | 222229 DKFZp434 | K.RPDDVF  | 0.233505398 | 0.92 S335  | 1.21 |
| IPI00069309.4 | 222229 DKFZp434 | R.ACAS*P/ | 0.401648339 | 0.98 S343  | 1.03 |
| IPI00069309.4 | 222229 DKFZp434 | R.ACAS*P/ | 0.03282354  | 0.79 S343  | 0.96 |
| IPI00069309.4 | 222229 DKFZp434 | K.RPDDVF  | 0.106353987 | 1 S337     | 1.24 |
| IPI00069693.4 |                 | K.AALLKA/ | 0.751731134 | 0.88 S139  | 0.77 |
| IPI00071188.1 | 984 CDC2L1      | K.RGT*S*F | 0.253322457 | 0.79 T704  | 1    |
| IPI00071188.1 | 984 CDC2L1      | K.RGTS*P  | 0.296993866 | 0.96 S705  | 1.08 |
| IPI00071188.1 | 984 CDC2L1      | R.EYGS*P  | 0.530774648 | 0.88 S542  | 0.89 |
| IPI00071188.1 | 984 CDC2L1      | R.DLLSDL/ | 0.001432711 | 0.79 S236  | 0.99 |
| IPI00071188.1 | 984 CDC2L1      | R.EY*GSP  | 0.431601138 | 0.96 Y540  | 1.09 |
| IPI00071188.1 | 984 CDC2L1      | R.GTS*PR  | 0.463105648 | 0.86 S705  | 1.1  |
| IPI00071188.1 | 984 CDC2L1      | R.MEITIRN | 0.096924105 | 0.92 S31   | 1.1  |
| IPI00071188.1 | 984 CDC2L1      | K.RGT*SP  | 0.296993866 | 0.98 T704  | 1.12 |
| IPI00071188.1 | 984 CDC2L1      | K.AYT*PV\ | 0.116581414 | 0.92 T548  | 1.2  |
| IPI00071188.1 | 984 CDC2L1      | R.GTSPRF  | 0.116581414 | 0.9 Y715   | 1.1  |
| IPI00071188.1 | 984 CDC2L1      | R.EYGS*P  | 0.604563646 | 0.98 S542  | 1.01 |
| IPI00071824.2 | 26586 CKAP2     | K.KVQFDC  | 0.166517367 | 0.92 S614  | 0.9  |
| IPI00071824.2 | 26586 CKAP2     | K.KVQFDC  | 0.166517367 | 0.92 T612  | 0.9  |
| IPI00072534.1 | 55898 UNC45A    | R.PATPGA  | 1.12E-06    | 0.59 S19   | 0.3  |
| IPI00072955.2 | 90861 HN1L      | K.LFS*PS/ | 2.34E-01    | 0.96 S1166 | 1.05 |
| IPI00072955.2 | 90861 HN1L      | K.TPAEGR  | 0.373234869 | 0.67 S785  | 0.72 |
| IPI00072955.2 | 90861 HN1L      | K.TSDIFG/ | 0.463105648 | 0.96 S97   | 0.94 |
| IPI00074587.7 | 727922 LOC72792 | R.SRS*FD/ | 0.296993866 | 0.96 S133  | 1.16 |
| IPI00075805.7 | 57587 KIAA1430  | K.HVSGITI | 0.214968943 | 0.96 S218  | 1.12 |
| IPI00082310.1 | 10657 KHDRBS1   | R.S*GSMC  | 0.694048494 | 0.88 S18   | 0.97 |
| IPI00082310.1 | 10657 KHDRBS1   | R.SGS*MC  | 0.92716125  | 0.88 S20   | 0.97 |
| IPI00082310.1 | 10657 KHDRBS1   | R.AS*PAT/ | 0.181528891 | 0.21 S58   | 0.55 |
| IPI00082310.1 | 10657 KHDRBS1   | R.ASPAT*( | 0.181528891 | 0.96 T61   | 1.15 |
| IPI00084746.2 | 7916 BAT2       | K.LGGPKE  | 0.139636808 | 0.81 T997  | 1.04 |
| IPI00084746.2 | 7916 BAT2       | R.ASSLLS/ | 5.20E-05    | 0.66 S163  | 0.94 |
| IPI00084746.2 | 7916 BAT2       | R.ASSLLS  | 5.20E-05    | 0.66 S166  | 0.94 |
| IPI00084746.2 | 7916 BAT2       | R.TAS*ET/ | 0.730331964 | 0.94 S1085 | 1.05 |
| IPI00084746.2 | 7916 BAT2       | K.EAPPPV  | 0.764845588 | 0.96 T1347 | 0.99 |

|               |                |           |             |            |      |
|---------------|----------------|-----------|-------------|------------|------|
| IPI00084746.2 | 7916 BAT2      | R.RKQS*S  | 0.872720802 | 0.83 S456  | 1.14 |
| IPI00084746.2 | 7916 BAT2      | R.RKQSS   | 0.726073545 | 0.83 S461  | 1.07 |
| IPI00084746.2 | 7916 BAT2      | K.LIPGPLE | 0.253322457 | 1 S1219    | 1.12 |
| IPI00084746.2 | 7916 BAT2      | K.EGPEPF  | 0.463105648 | 1 T610     | 1.04 |
| IPI00087375.1 | 51322 WAC      | R.IS*TPQT | 0.32093792  | 0.96 S353  | 1.15 |
| IPI00087375.1 | 51322 WAC      | R.IST*PQT | 0.346340474 | 1 T354     | 1.1  |
| IPI00087498.4 | 157570 ESCO2   | K.TTEINRL | 0.738886535 | 0.81 S75   | 1.02 |
| IPI00087498.4 | 157570 ESCO2   | K.CDSLLH  | 0.643675939 | 0.85 S29   | 1.05 |
| IPI00087498.4 | 157570 ESCO2   | R.VLSEPIC | 0.401648339 | 0.94 S512  | 1.01 |
| IPI00087498.4 | 157570 ESCO2   | R.LPSANC  | 0.373234869 | 1 S75      | 1.11 |
| IPI00096899.6 | 81620 CDT1     | R.LRLS*VI | 0.091610201 | 0.59 S73   | 0.62 |
| IPI00099746.3 | 728642 CDC2L2  | K.RGT*S*F | 0.253322457 | 0.79 T736  | 1    |
| IPI00099746.3 | 728642 CDC2L2  | K.RGTS*P  | 0.296993866 | 0.96 S737  | 1.08 |
| IPI00099746.3 | 728642 CDC2L2  | R.EY*GSP  | 0.49616549  | 0.96 Y572  | 1.02 |
| IPI00099746.3 | 728642 CDC2L2  | R.DLLSDL  | 0.001432711 | 0.79 S271  | 0.99 |
| IPI00099746.3 | 728642 CDC2L2  | K.AYT*PV  | 0.530774648 | 0.92 T580  | 1.16 |
| IPI00099746.3 | 728642 CDC2L2  | R.GTS*PR  | 0.463105648 | 0.86 S737  | 1.1  |
| IPI00099746.3 | 728642 CDC2L2  | K.RGT*SP  | 0.296993866 | 0.98 T736  | 1.12 |
| IPI00099746.3 | 728642 CDC2L2  | R.GTSPRF  | 0.116581414 | 0.9 S365   | 1.1  |
| IPI00099746.3 | 728642 CDC2L2  | R.GTSPRF  | 0.116581414 | 0.9 Y747   | 1.1  |
| IPI00100041.3 | 83746 L3MBTL2  | R.VKEEHL  | 6.68E-05    | 0.58 S683  | 0.97 |
| IPI00100151.3 | 22803 XRN2     | R.RNS*LG  | 0.03282354  | 0.94 S678  | 1.17 |
| IPI00100197.3 | 55968 NSFL1C   | R.KKS*PN  | 0.463105648 | 0.9 S114   | 0.93 |
| IPI00100468.4 | 54680 C1orf181 | K.SGGGL   | 0.214968943 | 1 S25      | 1.11 |
| IPI00100630.5 | 4298 MLLT1     | K.RPATAD  | 0.233505398 | 1 S296     | 1.16 |
| IPI00100630.5 | 4298 MLLT1     | K.RPATAD  | 0.233505398 | 1 S292     | 1.16 |
| IPI00100930.1 | 64897 C12orf43 | R.EAAVSA  | 0.643675939 | 0.96 T183  | 1.02 |
| IPI00100930.1 | 64897 C12orf43 | R.EAAVSA  | 0.98101429  | 0.94 S180  | 1.02 |
| IPI00100947.3 | 79165 LENG1    | R.HQNS*L  | 0.181528891 | 0.71 S59   | 0.9  |
| IPI00100980.9 | 30846 EHD2     | K.SKYDEIF | 0.214968943 | 0.9 S470   | 0.72 |
| IPI00100980.9 | 30846 EHD2     | K.SKYDEIF | 0.643675939 | 0.96 S468  | 0.93 |
| IPI00100980.9 | 30846 EHD2     | K.YDEIFY  | 0.726073545 | 0.96 S470  | 0.94 |
| IPI00100980.9 | 30846 EHD2     | K.YDEIFY  | 0.726073545 | 0.96 S468  | 0.94 |
| IPI00101062.4 | 79724 ZNF768   | R.SPGLVP  | 0.566916624 | 0.96 S97   | 0.97 |
| IPI00101062.4 | 79724 ZNF768   | R.YEPQS*  | 0.643675939 | 0.98 S125  | 1.02 |
| IPI00101062.4 | 79724 ZNF768   | R.S*PGLVI | 0.346340474 | 0.86 S90   | 0.94 |
| IPI00101532.5 | 55165 CEP55    | K.VAASPK  | 0.566916624 | 0.98 S428  | 0.98 |
| IPI00101532.5 | 55165 CEP55    | K.VAASPK  | 0.49616549  | 0.98 T430  | 0.98 |
| IPI00101532.5 | 55165 CEP55    | K.S*PTAAL | 0.530774648 | 0.92 S428  | 1.01 |
| IPI00101532.5 | 55165 CEP55    | K.SPT*AAL | 0.530774648 | 0.92 T430  | 1.01 |
| IPI00102291.1 | 84668 FAM126A  | K.S*FEQV  | 0.066203153 | 0.92 S453  | 1.11 |
| IPI00102377.2 | 84079 ANKRD27  | R.RHT*VE  | 0.000888315 | 0.92 T1023 | 1.38 |
| IPI00102427.3 |                | R.ILKS*PE | 0.566916624 | 0.03 S200  | 0.06 |
| IPI00102575.2 | 79915 ATAD5    | R.ISS*TPT | 0.346340474 | 0.92 S602  | 1.33 |
| IPI00102575.2 | 79915 ATAD5    | K.HSLYTA  | 0.49616549  | 0.88 S653  | 1    |
| IPI00102575.2 | 79915 ATAD5    | K.HSLYTA  | 0.346340474 | 0.88 S651  | 1    |
| IPI00102661.1 | 22974 TPX2     | R.SLRLS*/ | 0.928728317 | 0.98 S125  | 1.07 |
| IPI00102661.1 | 22974 TPX2     | K.RCATPV  | 0.214968943 | 0.83 S157  | 0.74 |
| IPI00102661.1 | 22974 TPX2     | K.ICRDPQ  | 0.738886535 | 1 T405     | 0.98 |
| IPI00102661.1 | 22974 TPX2     | K.ANLQQ   | 0.726073545 | 0.98 T72   | 0.98 |
| IPI00102661.1 | 22974 TPX2     | K.SSDQPL  | 0.49616549  | 1 S774     | 1.06 |

|               |        |           |            |             |      |       |      |
|---------------|--------|-----------|------------|-------------|------|-------|------|
| IPI00103013.1 | 257364 | SH3PX3    | R.SGISTNI  | 0.604563646 | 0.92 | S72   | 1.1  |
| IPI00103013.1 | 257364 | SH3PX3    | R.SGISTNI  | 0.604563646 | 0.92 | S73   | 1.1  |
| IPI00103145.3 | 117581 | TWIST2    | K.KGS*PS   | 0.075572151 | 0.77 | S55   | 0.92 |
| IPI00103256.4 |        |           | R.S*VNDLI  | 0.296993866 | 0.86 | S132  | 0.93 |
| IPI00103415.1 | 6777   | STAT5B    | R.IQAQFG   | 0.088241621 | 0.94 | S193  | 1.32 |
| IPI00103483.1 | 25920  | RP13-122E | R.KPS*PA   | 0.401648339 | 0.85 | S557  | 0.98 |
| IPI00103517.1 | 84126  | ATRIP     | R.GFS*AA   | 8.59E-05    | 0.81 | S38   | 1.14 |
| IPI00103554.1 | 57459  | GATAD2B   | R.GRLTPS   | 0.009053635 | 0.88 | S122  | 1.41 |
| IPI00103554.1 | 57459  | GATAD2B   | R.LTPSPD   | 0.267585708 | 0.9  | S135  | 0.87 |
| IPI00103654.1 | 151987 | PPP4R2    | K.NHSDSE   | 0.096924105 | 0.98 | S226  | 1.14 |
| IPI00103756.1 | 23155  | CLCC1     | R.FQTGNF   | 0.98101429  | 1    | S253  | 0.93 |
| IPI00104050.3 | 9967   | THRAP3    | K.SPVGKS   | 0.181528891 | 0.74 | S323  | 1.09 |
| IPI00104050.3 | 9967   | THRAP3    | R.ERS*PA   | 0.431601138 | 0.98 | S248  | 1.06 |
| IPI00104050.3 | 9967   | THRAP3    | K.SPVGKS   | 0.684201094 | 0.92 | S320  | 1.13 |
| IPI00104050.3 | 9967   | THRAP3    | K.WAHDKI   | 0.32093792  | 0.94 | S928  | 1.14 |
| IPI00104050.3 | 9967   | THRAP3    | R.RIDIS*P  | 0.27446972  | 1    | S682  | 1.14 |
| IPI00104050.3 | 9967   | THRAP3    | R.ERS*PA   | 0.463105648 | 1    | S248  | 1.06 |
| IPI00104050.3 | 9967   | THRAP3    | R.IDIS*PS  | 0.346340474 | 1    | S682  | 1.11 |
| IPI00104907.3 | 55320  | C14orf106 | K.AVTDFV   | 0.928728317 | 0.98 | S690  | 0.99 |
| IPI00104907.3 | 55320  | C14orf106 | K.KAYILVT  | 0.643675939 | 0.98 | T653  | 0.98 |
| IPI00104907.3 | 55320  | C14orf106 | K.AVTDFV   | 0.346340474 | 0.98 | S693  | 0.97 |
| IPI00104907.3 | 55320  | C14orf106 | R.ILLPS*F  | 0.743182508 | 0.88 | S1004 | 0.8  |
| IPI00104907.3 | 55320  | C14orf106 | R.EFLEQL   | 0.684201094 | 0.98 | T993  | 0.96 |
| IPI00104907.3 | 55320  | C14orf106 | R.NTSNIP   | 0.074223941 | 0.56 | T821  | 0.71 |
| IPI00104907.3 | 55320  | C14orf106 | R.ILLPSFC  | 0.886608864 | 0.98 | S1008 | 0.96 |
| IPI00106955.3 | 144097 | LOC14409  | R.AES*PSI  | 0.643675939 | 0.98 | S308  | 1    |
| IPI00107484.1 | 55274  | PHF10     | K.RYS*PD   | 0.49616549  | 0.98 | S180  | 1.06 |
| IPI00107484.1 | 55274  | PHF10     | R.YLPLNT   | 0.845194016 | 0.98 | S207  | 1.04 |
| IPI00107660.1 |        |           | K.GIGT*PF  | 8.59E-05    | 0.85 | T110  | 1.67 |
| IPI00107660.1 |        |           | K.GIGTPPI  | 0.034268332 | 0.98 | T115  | 0.62 |
| IPI00107660.1 |        |           | K.LCS*SAE  | 0.002581506 | 0.9  | S407  | 1.17 |
| IPI00107660.1 |        |           | K.GIGTPPI  | 0.98101429  | 0.96 | S121  | 0.94 |
| IPI00107698.2 | 10818  | FRS2      | R.TALLNY   | 0.684519102 | 0.76 | S354  | 0.91 |
| IPI00107838.1 | 8567   | MADD      | R.KRSPTTE  | 0.054409842 | 0.94 | T1046 | 1.23 |
| IPI00107838.1 | 8567   | MADD      | R.KRSPTTE  | 0.054409842 | 0.94 | S1043 | 1.23 |
| IPI00107838.1 | 8567   | MADD      | R.GTLS*D   | 0.066203153 | 0.86 | S1201 | 1.06 |
| IPI00107838.1 | 8567   | MADD      | R.GT*LSD   | 0.066203153 | 0.86 | T1199 | 1.06 |
| IPI00140998.3 | 7024   | TFCP2     | R.NRFS*TI  | 0.566916624 | 0.9  | S292  | 1.16 |
| IPI00141933.2 | 701    | BUB1B     | K.KLS*PIIE | 0.139636808 | 0.86 | S670  | 0.87 |
| IPI00141934.1 |        |           | R.S*PLFIF  | 0.296993866 | 0.98 | S77   | 1.1  |
| IPI00148057.2 | 10902  | BRD8      | K.AT*PPP   | 0.139636808 | 0.74 | T264  | 1.06 |
| IPI00149098.1 | 6872   | TAF1      | R.LLEPPV   | 0.49616549  | 0.88 | S545  | 0.87 |
| IPI00151170.4 | 7272   | TTK       | K.HTTFEQ   | 0.886608864 | 0.88 | S436  | 0.96 |
| IPI00151170.4 | 7272   | TTK       | K.YVLGQL   | 0.809048575 | 0.98 | S821  | 1.01 |
| IPI00152007.1 | 9828   | ARHGAF1   | R.RPS*AD   | 0.088241621 | 0.88 | S142  | 1.13 |
| IPI00152011.4 | 9411   | ARHGAP2   | R.LLLAS*F  | 0.760488858 | 0.83 | S1029 | 1.01 |
| IPI00152011.4 | 9411   | ARHGAP2   | R.RSS*DS   | 0.296993866 | 0.62 | S1144 | 0.9  |
| IPI00152011.4 | 9411   | ARHGAP2   | K.IRPVS*L  | 0.233505398 | 0.98 | S1019 | 1.16 |
| IPI00152082.1 | 221908 | C7orf47   | R.APVPEP   | 0.463105648 | 0.72 | S47   | 1.1  |
| IPI00152082.1 | 221908 | C7orf47   | R.APVPEP   | 0.197661257 | 0.76 | S45   | 0.99 |
| IPI00152083.3 | 136647 | C7orf11   | R.DGY*GS   | 0.181528891 | 0.96 | Y45   | 1.18 |

|               |        |           |           |             |      |       |      |
|---------------|--------|-----------|-----------|-------------|------|-------|------|
| IPI00152251.3 | 84838  | ZNF496    | K.NQDAQF  | 0.614059792 | 0.86 | S168  | 0.84 |
| IPI00152251.3 | 84838  | ZNF496    | K.NQDAQF  | 0.418612999 | 0.76 | S165  | 0.73 |
| IPI00152407.3 | 147339 | C18orf25  | R.RDSS*E  | 0.152571688 | 0.94 | S67   | 1.34 |
| IPI00152407.3 | 147339 | C18orf25  | R.RDS*SE  | 0.152571688 | 0.94 | S66   | 1.34 |
| IPI00152407.3 | 147339 | C18orf25  | R.RDSSES  | 0.00181541  | 0.92 | S76   | 1.15 |
| IPI00152407.3 | 147339 | C18orf25  | R.RDSSES  | 0.00181541  | 0.92 | S69   | 1.15 |
| IPI00152407.3 | 147339 | C18orf25  | R.RDSSES  | 0.00181541  | 0.92 | S73   | 1.15 |
| IPI00152510.2 | 79039  | DDX54     | R.PLPTFP  | 0.346340474 | 0.98 | S75   | 1.04 |
| IPI00152849.1 | 85417  | CCNB3     | K.LGYWVF  | 8.22E-15    | 0.81 | S1331 | 4.08 |
| IPI00152946.1 | 29127  | RACGAP1   | R.QGNFFA  | 0.888156101 | 0.92 | S628  | 0.91 |
| IPI00152946.1 | 29127  | RACGAP1   | R.CPLPCIF | 0.346340474 | 0.92 | T342  | 1.06 |
| IPI00152946.1 | 29127  | RACGAP1   | R.S*IGSAV | 0.858851798 | 0.98 | S203  | 1.02 |
| IPI00152990.6 | 55102  | C14orf103 | K.SYIS*PH | 0.32093792  | 0.98 | S1747 | 1.07 |
| IPI00152990.6 | 55102  | C14orf103 | K.KS*PGA  | 0.000429319 | 0.9  | S1911 | 1.4  |
| IPI00154515.3 | 79753  | SNIP1     | R.LS*PEV/ | 0.116581414 | 1    | S35   | 1.21 |
| IPI00154590.6 | 84365  | MKI67IP   | K.KVSGTL  | 0.000262831 | 0.72 | T223  | 1.52 |
| IPI00154614.2 | 85437  | ZCRB1     | K.APEPEE  | 0.863507405 | 0.62 | S155  | 0.77 |
| IPI00154614.2 | 85437  | ZCRB1     | K.KAPEPE  | 0.764845588 | 0.9  | S155  | 0.99 |
| IPI00154915.1 | 56288  | PARD3     | R.RIS*HSL | 0.49616549  | 0.72 | S715  | 0.92 |
| IPI00154915.1 | 56288  | PARD3     | R.RISHSL\ | 0.726073545 | 0.86 | Y719  | 1.04 |
| IPI00154915.1 | 56288  | PARD3     | R.RISHS*L | 0.012603917 | 0.88 | S717  | 1.08 |
| IPI00154915.1 | 56288  | PARD3     | R.RISHSL\ | 0.066203153 | 0.92 | S720  | 1.22 |
| IPI00154915.1 | 56288  | PARD3     | K.AGS*PS  | 0.000243782 | 0.96 | S873  | 0.95 |
| IPI00154915.1 | 56288  | PARD3     | R.SS*LSA9 | 0.152571688 | 0.98 | S221  | 1.09 |
| IPI00154915.1 | 56288  | PARD3     | R.S*LSA9  | 0.152571688 | 0.98 | S220  | 1.09 |
| IPI00154915.1 | 56288  | PARD3     | R.RISHS*L | 0.049260986 | 0.98 | S717  | 1.17 |
| IPI00154915.1 | 56288  | PARD3     | R.WS*TTA  | 0.936890791 | 0.98 | S174  | 0.93 |
| IPI00154915.1 | 56288  | PARD3     | R.ISHSLY9 | 0.181528891 | 0.98 | S728  | 1.14 |
| IPI00154915.1 | 56288  | PARD3     | R.ISHSLY9 | 0.181528891 | 0.98 | S730  | 1.14 |
| IPI00154915.1 | 56288  | PARD3     | R.RIS*HSL | 0.463105648 | 1    | S715  | 1.13 |
| IPI00154915.1 | 56288  | PARD3     | R.RIS*HSL | 0.181528891 | 1    | S715  | 1.12 |
| IPI00154915.1 | 56288  | PARD3     | R.FS*PDS9 | 0.463105648 | 0.96 | S383  | 1.13 |
| IPI00154915.1 | 56288  | PARD3     | R.RSS*DP  | 0.84064003  | 0.81 | S144  | 0.94 |
| IPI00154915.1 | 56288  | PARD3     | R.RS*SDP  | 0.566916624 | 0.81 | S143  | 0.94 |
| IPI00154915.1 | 56288  | PARD3     | K.SPGS*P  | 0.604563646 | 0.77 | S695  | 0.88 |
| IPI00155134.3 | 57605  | PITPNM2   | R.SDS*ST  | 0.166517367 | 0.79 | S668  | 1.29 |
| IPI00156449.1 | 84437  | KIAA1826  | R.RENELP  | 0.942907226 | 0.98 | T79   | 0.9  |
| IPI00156793.4 | 7508   | XPC       | K.SEAAAP  | 0.643675939 | 0.98 | S883  | 1.11 |
| IPI00156793.4 | 7508   | XPC       | R.SLLPVK  | 0.346340474 | 0.96 | T169  | 1.11 |
| IPI00156793.4 | 7508   | XPC       | K.VIKDEAL | 0.001613065 | 0.66 | S94   | 0.89 |
| IPI00156793.4 | 7508   | XPC       | K.VIKDEAL | 0.383343176 | 0.92 | S94   | 0.82 |
| IPI00157230.3 | 6242   | RTKN      | R.T*FSLD/ | 0.060044376 | 0.92 | T505  | 1.25 |
| IPI00157230.3 | 6242   | RTKN      | R.TFS*LD/ | 0.054409842 | 0.98 | S507  | 1.29 |
| IPI00157384.2 | 548321 | FAM27A    | R.EDACIF9 | 0           | 0.71 | S65   | 3.87 |
| IPI00158159.3 | 4799   | NFX1      | K.SQQTSF  | 5.97E-06    | 0.94 | S95   | 1.76 |
| IPI00158159.3 | 4799   | NFX1      | R.RQDPQ\  | 0.401648339 | 0.98 | S326  | 1.16 |
| IPI00158159.3 | 4799   | NFX1      | R.NYSS*P  | 0.253322457 | 0.98 | S50   | 1.13 |
| IPI00158992.2 | 6621   | SNAPC4    | R.TDTPAP  | 0.346340474 | 0.98 | T1157 | 1.09 |
| IPI00158992.2 | 6621   | SNAPC4    | R.GGAGA\  | 0.296993866 | 0.96 | S599  | 1.06 |
| IPI00160901.3 | 51512  | GTSE1     | R.AQRPQ9  | 0.012603917 | 0.96 | S477  | 1.45 |
| IPI00160901.3 | 51512  | GTSE1     | K.NVAKPS  | 0.684201094 | 0.64 | S688  | 0.75 |

|               |        |         |           |             |      |       |      |
|---------------|--------|---------|-----------|-------------|------|-------|------|
| IPI00160901.3 | 51512  | GTSE1   | K.NVAKPS  | 0.096924105 | 0.88 | S699  | 1.2  |
| IPI00160901.3 | 51512  | GTSE1   | R.AVGS*P  | 0.891255812 | 0.86 | S536  | 1.19 |
| IPI00160901.3 | 51512  | GTSE1   | K.NVAKPS  | 0.530774648 | 0.58 | S688  | 0.77 |
| IPI00160901.3 | 51512  | GTSE1   | R.LLASS*F | 0.214968943 | 0.94 | S168  | 1.03 |
| IPI00160901.3 | 51512  | GTSE1   | R.LVDVS*I | 0.088241621 | 0.96 | S575  | 1.26 |
| IPI00160901.3 | 51512  | GTSE1   | R.S*SGPA  | 0.373234869 | 0.92 | S494  | 1.05 |
| IPI00160901.3 | 51512  | GTSE1   | R.SS*GPA  | 0.373234869 | 0.92 | S495  | 1.05 |
| IPI00160901.3 | 51512  | GTSE1   | R.LVDVSP  | 0.181528891 | 0.98 | S580  | 1.14 |
| IPI00160901.3 | 51512  | GTSE1   | R.VPQALN  | 0.32093792  | 0.88 | S611  | 1.17 |
| IPI00161966.2 |        |         | R.HIISATS | 0.346340474 | 0.98 | S226  | 0.98 |
| IPI00161966.2 |        |         | R.KVTPID  | 0.214968943 | 0.9  | S740  | 1.05 |
| IPI00161966.2 |        |         | R.VRS*PD  | 0.296993866 | 0.94 | S776  | 1.22 |
| IPI00161966.2 |        |         | R.VRS*PD  | 0.643675939 | 0.98 | S776  | 0.99 |
| IPI00163172.2 | 6502   | SKP2    | K.SKGS*D  | 0.32093792  | 0.81 | S75   | 0.87 |
| IPI00163172.2 | 6502   | SKP2    | R.LKS*KG  | 0.12765804  | 0.98 | S72   | 1.13 |
| IPI00163172.2 | 6502   | SKP2    | R.SFMDQF  | 0.523719116 | 0.9  | S179  | 1.07 |
| IPI00163172.2 | 6502   | SKP2    | K.TSELLS  | 0.936890791 | 0.76 | S64   | 0.86 |
| IPI00163319.1 | 4774   | NFIA    | R.SPGSG   | 0.346340474 | 0.94 | S305  | 1.09 |
| IPI00163319.1 | 4774   | NFIA    | R.SPGSG   | 0.726073545 | 0.94 | T321  | 1.03 |
| IPI00163319.1 | 4774   | NFIA    | R.LKS*VEI | 0.91461637  | 0.71 | S280  | 0.91 |
| IPI00163319.1 | 4774   | NFIA    | R.S*PGSG  | 0.566916624 | 0.79 | S300  | 0.93 |
| IPI00163319.1 | 4774   | NFIA    | R.LKS*VEI | 0.03637398  | 0.98 | S280  | 1.12 |
| IPI00163319.1 | 4774   | NFIA    | R.S*PGSG  | 0.373234869 | 1    | S300  | 1.14 |
| IPI00163319.1 | 4774   | NFIA    | R.S*PGSG  | 0.463105648 | 1    | S300  | 1.07 |
| IPI00163319.1 | 4774   | NFIA    | R.S*PGSG  | 0.463105648 | 1    | S300  | 1.07 |
| IPI00163391.4 | 79066  | METT10D | K.ELSLKA  | 0.786805188 | 0.94 | S329  | 1.13 |
| IPI00163514.1 | 133522 | PPARGC1 | R.S*WEPS  | 0.181528891 | 0.72 | S672  | 1.06 |
| IPI00163516.3 | 752    | FMNL1   | K.EAAAQE  | 0.106353987 | 0.88 | S1031 | 1.34 |
| IPI00163516.3 | 752    | FMNL1   | K.EAAAQE  | 0.679764929 | 0.83 | T1020 | 1.12 |
| IPI00163602.1 | 8394   | PIP5K1A | R.RAGS*S  | 0.805160956 | 0.83 | S462  | 0.89 |
| IPI00163602.1 | 8394   | PIP5K1A | R.RAGSSC  | 0.49616549  | 1    | S466  | 1.08 |
| IPI00163602.1 | 8394   | PIP5K1A | K.AEVEPG  | 0.530774648 | 0.94 | T503  | 0.96 |
| IPI00163602.1 | 8394   | PIP5K1A | K.AEVEPG  | 0.214181266 | 0.96 | T503  | 0.72 |
| IPI00163602.1 | 8394   | PIP5K1A | K.AEVEPG  | 0.430690939 | 0.96 | T503  | 0.72 |
| IPI00163646.1 | 11214  | AKAP13  | R.IPSFFP  | 0.214968943 | 0.79 | S2709 | 1.01 |
| IPI00163904.1 | 26108  | PYGO1   | K.VSSHGC  | 0.003656496 | 0.9  | S34   | 1.13 |
| IPI00164434.5 | 221035 | REEP3   | K.SKPAPS  | 0.810035043 | 0.9  | T201  | 0.97 |
| IPI00164434.5 | 221035 | REEP3   | R.SFS*MH  | 0.27446972  | 1    | S152  | 1.12 |
| IPI00164434.5 | 221035 | REEP3   | R.S*FSMH  | 0.27446972  | 1    | S150  | 1.12 |
| IPI00164672.5 | 55802  | DCP1A   | R.KASSPS  | 5.25E-06    | 0.37 | S527  | 1.27 |
| IPI00164672.5 | 55802  | DCP1A   | R.KASS*P  | 0.049260986 | 0.98 | S525  | 1.28 |
| IPI00164672.5 | 55802  | DCP1A   | R.KAS*SP  | 0.049260986 | 0.98 | S524  | 1.28 |
| IPI00164672.5 | 55802  | DCP1A   | R.KASS*P  | 0.99978897  | 0.86 | S525  | 1.04 |
| IPI00164779.1 | 8487   | SIP1    | R.LLPVEP  | 0.096924105 | 0.71 | T48   | 1.2  |
| IPI00164906.1 | 22907  | DHX30   | R.GFS*SS  | 0.936890791 | 0.96 | S36   | 1.06 |
| IPI00165014.3 | 79842  | ZBTB3   | R.GLVT*SI | 0.106353987 | 0.81 | T438  | 1.52 |
| IPI00165014.3 | 79842  | ZBTB3   | R.GLVT*SI | 0.066203153 | 0.9  | S439  | 1.38 |
| IPI00165216.4 | 5332   | PLCB4   | R.AMGIET  | 0.016614876 | 0.52 | S726  | 0.63 |
| IPI00165237.3 | 54663  | WDR74   | R.KLS*GL  | 0.373234869 | 0.98 | S342  | 1.04 |
| IPI00165357.4 | 57504  | MTA3    | R.HAELSC  | 0.040276449 | 0.9  | S519  | 1.44 |
| IPI00165547.1 | 5298   | PIK4CB  | R.ELPSLS  | 0.166517367 | 1    | T263  | 1.26 |

|               |        |          |           |             |      |       |       |
|---------------|--------|----------|-----------|-------------|------|-------|-------|
| IPI00165547.1 | 5298   | PIK4CB   | R.ELPSLS  | 0.166517367 | 1    | S266  | 1.26  |
| IPI00165547.1 | 5298   | PIK4CB   | R.S*VENLI | 0.166517367 | 0.98 | S413  | 1.18  |
| IPI00165979.3 | 25998  | IBTK     | R.KRSDS*  | 0.000110287 | 0.94 | S988  | 1.86  |
| IPI00165979.3 | 25998  | IBTK     | R.KRS*DS  | 0.604563646 | 0.86 | S986  | 1     |
| IPI00165979.3 | 25998  | IBTK     | R.SDSSGC  | 4.30E-09    | 0.5  | Y992  | 1.51  |
| IPI00165979.3 | 25998  | IBTK     | R.KRS*DS  | 0.523719116 | 0.81 | S986  | 0.68  |
| IPI00165979.3 | 25998  | IBTK     | R.KRS*DS  | 0.296993866 | 0.72 | S986  | 1.08  |
| IPI00165979.3 | 25998  | IBTK     | R.KRSDSE  | 0.000262831 | 0.98 | S989  | 1.78  |
| IPI00165979.3 | 25998  | IBTK     | R.KRSDSE  | 4.58E-05    | 0.98 | S1000 | 1.78  |
| IPI00165979.3 | 25998  | IBTK     | R.KRSDSE  | 4.58E-05    | 0.98 | Y992  | 1.78  |
| IPI00165979.3 | 25998  | IBTK     | R.KRSDSE  | 4.58E-05    | 0.98 | S995  | 1.78  |
| IPI00165979.3 | 25998  | IBTK     | R.DLQS*P  | 0.431601138 | 0.96 | S1041 | 0.9   |
| IPI00165979.3 | 25998  | IBTK     | R.KRSDSE  | 0.303680857 | 0.98 | S989  | 0.87  |
| IPI00165979.3 | 25998  | IBTK     | R.KRSDS*  | 0.303680857 | 0.98 | S988  | 0.87  |
| IPI00165979.3 | 25998  | IBTK     | R.KRS*DS  | 0.166517367 | 0.96 | S986  | 1.15  |
| IPI00165979.3 | 25998  | IBTK     | K.VKPYVN  | 0.402755896 | 1    | S1065 | 0.8   |
| IPI00165979.3 | 25998  | IBTK     | R.DLQSPC  | 0.401648339 | 0.96 | S1050 | 1.01  |
| IPI00165979.3 | 25998  | IBTK     | K.VKPYVN  | 0.391052876 | 0.5  | T1064 | 0.27  |
| IPI00165979.3 | 25998  | IBTK     | R.EDLKPV  | 0.902796178 | 1    | S1079 | 0.9   |
| IPI00165979.3 | 25998  | IBTK     | R.KRS*DS  | 0.756570768 | 1    | S986  | 0.88  |
| IPI00165979.3 | 25998  | IBTK     | R.KRS*DS  | 0.001272035 | 0.32 | S986  | 0.81  |
| IPI00166044.1 | 57521  | KIAA1303 | K.GVHIHQ  | 0.026666866 | 0.85 | T889  | 1.31  |
| IPI00166044.1 | 57521  | KIAA1303 | R.LRS*VS  | 0.002296625 | 0.94 | S719  | 1.93  |
| IPI00166044.1 | 57521  | KIAA1303 | R.LRS*VS  | 0.000618432 | 0.98 | S719  | 1.78  |
| IPI00166044.1 | 57521  | KIAA1303 | K.GVHIHQ  | 0.001272035 | 0.94 | S877  | 1.89  |
| IPI00166044.1 | 57521  | KIAA1303 | K.GVHIHQ  | 0.054409842 | 0.92 | S877  | 1.24  |
| IPI00166044.1 | 57521  | KIAA1303 | R.VLDTSS  | 0.253322457 | 0.98 | S863  | 1.1   |
| IPI00166211.3 | 55057  | AIM1L    | R.EVRSLC  | 0           | 0.64 | S433  | 99.69 |
| IPI00166861.3 | 121053 | C12orf45 | K.GKIEVLI | 0.152571688 | 0.98 | S181  | 1.16  |
| IPI00166861.3 | 121053 | C12orf45 | K.GKIEVLI | 0.152571688 | 0.98 | S178  | 1.16  |
| IPI00166861.3 | 121053 | C12orf45 | K.GKIEVLI | 0.197661257 | 1    | S178  | 1.1   |
| IPI00166874.3 | 10212  | DDX39    | K.GS*YVS  | 0.604563646 | 0.94 | S37   | 0.87  |
| IPI00166933.1 | 26148  | C10orf12 | K.RLTS*SI | 0.928728317 | 0.98 | S728  | 1.13  |
| IPI00166933.1 | 26148  | C10orf12 | K.IKPNLS* | 0.072926818 | 0.98 | S293  | 1.12  |
| IPI00167069.1 | 9314   | KLF4     | K.GS*PDG  | 0.530774648 | 0.98 | S245  | 1.11  |
| IPI00167074.3 | 151188 | ARL6IP6  | R.SVLPPD  | 0.463105648 | 0.71 | S80   | 1.1   |
| IPI00167147.1 | 11100  | HNRPUL1  | R.RGRS*P  | 0.373234869 | 0.27 | S194  | 0.71  |
| IPI00167147.1 | 11100  | HNRPUL1  | R.GRS*PQ  | 0.27446972  | 0.85 | S194  | 1.08  |
| IPI00167147.1 | 11100  | HNRPUL1  | R.RGRSPC  | 0.27446972  | 0.98 | T209  | 1.11  |
| IPI00167147.1 | 11100  | HNRPUL1  | R.RGRSPC  | 0.32093792  | 0.98 | T215  | 1.07  |
| IPI00167909.4 | 256364 | EML3     | R.GGKDPI  | 0.007240509 | 0.86 | S198  | 1.46  |
| IPI00167909.4 | 256364 | EML3     | R.VLGAGC  | 0.00181541  | 0.9  | T881  | 1.31  |
| IPI00167909.4 | 256364 | EML3     | R.KAIS*SA | 0.088241621 | 1    | S176  | 1.26  |
| IPI00168056.2 | 253461 | ZBTB38   | R.SKS*PN  | 0.643675939 | 0.98 | S309  | 1.01  |
| IPI00168056.2 | 253461 | ZBTB38   | R.S*KSPN  | 0.643675939 | 0.98 | S307  | 1.01  |
| IPI00168056.2 | 253461 | ZBTB38   | R.NFSNS*  | 0.786805188 | 0.61 | S130  | 1.04  |
| IPI00168165.2 | 23122  | CLASP2   | K.DKSFDC  | 0.831562154 | 0.94 | S254  | 1.01  |
| IPI00168165.2 | 23122  | CLASP2   | K.DKSFDC  | 0.831562154 | 0.94 | S258  | 1.01  |
| IPI00168165.2 | 23122  | CLASP2   | K.DKS*FDI | 0.831562154 | 0.94 | S241  | 1.01  |
| IPI00168165.2 | 23122  | CLASP2   | R.SRS*DIE | 0.088241621 | 1    | S603  | 1.21  |
| IPI00168165.2 | 23122  | CLASP2   | R.DYNPYN  | 0.49616549  | 0.9  | S1240 | 0.97  |

|               |        |         |           |             |      |       |      |
|---------------|--------|---------|-----------|-------------|------|-------|------|
| IPI00168165.2 | 23122  | CLASP2  | R.DYNPYM  | 0.49616549  | 0.9  | S1242 | 0.97 |
| IPI00168165.2 | 23122  | CLASP2  | R.VLNTGS  | 0.181528891 | 0.98 | S808  | 1.11 |
| IPI00168171.4 |        |         | R.AAATGM  | 0.431601138 | 1    | S44   | 1.08 |
| IPI00168378.2 | 64419  | MTMR14  | R.AVLHTD  | 0.044561326 | 0.56 | S576  | 0.64 |
| IPI00168378.2 | 64419  | MTMR14  | R.AVAPS*I | 0.489032481 | 0.88 | S624  | 0.89 |
| IPI00168378.2 | 64419  | MTMR14  | R.MGSS*P  | 0.717985529 | 0.94 | S530  | 0.91 |
| IPI00168527.1 | 55114  | ARHGAP1 | R.AESSSC  | 0           | 0.72 | S297  | 0.07 |
| IPI00168527.1 | 55114  | ARHGAP1 | R.AESSSC  | 0.152571688 | 1    | S302  | 1.13 |
| IPI00168550.4 | 84215  | ZNF541  | R.RESILS  | 0           | 0.58 | S455  | 0.01 |
| IPI00168698.1 | 118987 | PDZD8   | R.AQNEFK  | 0.775968482 | 0.94 | S519  | 0.85 |
| IPI00168849.1 | 9322   | TRIP10  | R.APSDSS  | 0.253322457 | 0.92 | T302  | 1.2  |
| IPI00168859.2 | 4150   | MAZ     | K.LS*HSDI | 0.431601138 | 0.98 | S300  | 1    |
| IPI00168859.2 | 4150   | MAZ     | K.LSHS*DI | 0.346340474 | 0.98 | S302  | 1    |
| IPI00169299.1 | 26031  | OSBPL3  | R.ALVHQL  | 0.005777772 | 0.83 | S437  | 1.06 |
| IPI00169299.1 | 26031  | OSBPL3  | R.RIHAESI | 0.401648339 | 0.9  | S410  | 1.11 |
| IPI00169299.1 | 26031  | OSBPL3  | R.TYSAPA  | 0.197661257 | 0.9  | S265  | 1.09 |
| IPI00169307.2 | 57584  | ARHGAP2 | K.HNKS*P  | 0.27446972  | 0.9  | S1514 | 1.16 |
| IPI00169307.2 | 57584  | ARHGAP2 | R.SAS*QG  | 0.296993866 | 0.81 | S477  | 1.06 |
| IPI00169307.2 | 57584  | ARHGAP2 | R.FAILKE  | 0.895911332 | 0.92 | S1527 | 1.16 |
| IPI00169307.2 | 57584  | ARHGAP2 | R.SAS*QG  | 4.04E-05    | 0.52 | S477  | 0.87 |
| IPI00169307.2 | 57584  | ARHGAP2 | R.LRTS*TS | 0.27446972  | 1    | S1861 | 1.24 |
| IPI00169307.2 | 57584  | ARHGAP2 | K.GKS*TG  | 0.32093792  | 0.98 | S1742 | 1.14 |
| IPI00169307.2 | 57584  | ARHGAP2 | R.S*ASQG  | 0.139636808 | 0.98 | S475  | 1.2  |
| IPI00169307.2 | 57584  | ARHGAP2 | R.S*TSHD  | 0.233505398 | 0.98 | S441  | 1.06 |
| IPI00169307.2 | 57584  | ARHGAP2 | R.ST*SHD  | 0.233505398 | 0.98 | T442  | 1.06 |
| IPI00169401.2 | 54477  | PLEKHA5 | R.AKSPTP  | 0.233505398 | 0.96 | S918  | 1.19 |
| IPI00169401.2 | 54477  | PLEKHA5 | R.SVPAGL  | 0.563781928 | 0.86 | S607  | 0.87 |
| IPI00169401.2 | 54477  | PLEKHA5 | K.ERPISM  | 0.717985529 | 0.94 | S140  | 1.08 |
| IPI00169401.2 | 54477  | PLEKHA5 | R.T*NSMQ  | 0.32093792  | 0.92 | T408  | 0.88 |
| IPI00169401.2 | 54477  | PLEKHA5 | R.YPEGYF  | 0.080258071 | 0.98 | T460  | 1.33 |
| IPI00169401.2 | 54477  | PLEKHA5 | R.GVISYQ  | 0.214968943 | 1    | T438  | 1.17 |
| IPI00169401.2 | 54477  | PLEKHA5 | R.AKS*PTI | 0.214968943 | 1    | S913  | 1.14 |
| IPI00169434.3 | 26058  | TNRC15  | R.VGVEAS  | 0.152571688 | 0.96 | S376  | 1.15 |
| IPI00169434.3 | 26058  | TNRC15  | R.VGVEAS  | 0.152571688 | 0.96 | T382  | 1.15 |
| IPI00169434.3 | 26058  | TNRC15  | R.SGS*GS  | 0.346340474 | 0.86 | S275  | 0.88 |
| IPI00169434.3 | 26058  | TNRC15  | R.ALSSGC  | 0.139636808 | 0.94 | S30   | 0.99 |
| IPI00169434.3 | 26058  | TNRC15  | R.PGT*PS  | 0.106353987 | 0.98 | T404  | 1.26 |
| IPI00169434.3 | 26058  | TNRC15  | R.PGTPSL  | 0.106353987 | 0.98 | S388  | 1.26 |
| IPI00169434.3 | 26058  | TNRC15  | R.ALSSGC  | 0.91461637  | 0.92 | S26   | 1.07 |
| IPI00169434.3 | 26058  | TNRC15  | R.VGVEAS  | 0.214968943 | 0.98 | S388  | 1.22 |
| IPI00169434.3 | 26058  | TNRC15  | R.ALSSGC  | 0.827038504 | 0.98 | S26   | 0.97 |
| IPI00170581.1 | 10762  | NUP50   | K.KVDSSV  | 0.401648339 | 0.98 | S266  | 1.02 |
| IPI00170581.1 | 10762  | NUP50   | K.KVDSSV  | 0.401648339 | 0.98 | S268  | 1.02 |
| IPI00170581.1 | 10762  | NUP50   | K.VAAETQ  | 0.760488858 | 0.96 | S193  | 0.97 |
| IPI00170581.1 | 10762  | NUP50   | K.VAAETQ  | 0.760488858 | 0.96 | T191  | 0.97 |
| IPI00170594.4 | 25909  | AHCTF1  | R.NTPAKS  | 0.463105648 | 0.81 | S2055 | 1.01 |
| IPI00170594.4 | 25909  | AHCTF1  | R.NT*PAK  | 0.463105648 | 0.81 | T2022 | 1.01 |
| IPI00170594.4 | 25909  | AHCTF1  | R.CLVAGL  | 0.373234869 | 0.58 | S566  | 0.84 |
| IPI00170594.4 | 25909  | AHCTF1  | K.EPINSTI | 0.373234869 | 0.74 | S1089 | 0.8  |
| IPI00170594.4 | 25909  | AHCTF1  | R.STPLAS  | 0.104720341 | 0.96 | S1256 | 0.68 |
| IPI00170594.4 | 25909  | AHCTF1  | R.STPLAS  | 0.267585708 | 0.98 | S1223 | 0.74 |



|               |        |          |           |             |      |       |      |
|---------------|--------|----------|-----------|-------------|------|-------|------|
| IPI00170594.4 | 25909  | AHCTF1   | K.WIPGAA  | 0.166517367 | 0.98 | T1295 | 1.17 |
| IPI00170594.4 | 25909  | AHCTF1   | K.ESAWS*  | 0.197661257 | 0.92 | S2221 | 1.09 |
| IPI00170594.4 | 25909  | AHCTF1   | R.STPLAS  | 0.917421569 | 0.9  | S1254 | 0.67 |
| IPI00170594.4 | 25909  | AHCTF1   | R.PSQCSE  | 0.566916624 | 0.98 | S1151 | 0.97 |
| IPI00170594.4 | 25909  | AHCTF1   | R.TTSFFLI | 0.824668282 | 0.92 | S1321 | 0.98 |
| IPI00170594.4 | 25909  | AHCTF1   | R.TTS*FFL | 0.824668282 | 0.92 | S1287 | 0.98 |
| IPI00170594.4 | 25909  | AHCTF1   | R.IS*FVEE | 0.769214181 | 0.98 | S1270 | 1.04 |
| IPI00170594.4 | 25909  | AHCTF1   | R.NLS*FNI | 0.951462987 | 0.96 | S1579 | 1.06 |
| IPI00170594.4 | 25909  | AHCTF1   | R.SLPSSS  | 0.49616549  | 1    | S1198 | 1.07 |
| IPI00170641.2 | 57706  | DENND1A  | R.RTS*VP  | 0.003656496 | 0.88 | S520  | 1.27 |
| IPI00170641.2 | 57706  | DENND1A  | R.RTS*VP  | 0.152571688 | 0.77 | S520  | 0.98 |
| IPI00170766.3 | 57082  | CASC5    | R.RVS*FAI | 0.296993866 | 0.96 | S60   | 1.18 |
| IPI00170766.3 | 57082  | CASC5    | K.NIKDVQ  | 0.253322457 | 0.9  | S1050 | 1.09 |
| IPI00170770.2 | 23469  | PHF3     | K.ST*FSPA | 0.751731134 | 0.61 | T1182 | 1.14 |
| IPI00170770.2 | 23469  | PHF3     | K.VAQNS*  | 0.32093792  | 0.98 | S1722 | 1.13 |
| IPI00170770.2 | 23469  | PHF3     | R.RHS*DP  | 0.463105648 | 0.88 | S1898 | 1.02 |
| IPI00170770.2 | 23469  | PHF3     | R.KHS*DN  | 0.197661257 | 0.72 | S1148 | 0.81 |
| IPI00170770.2 | 23469  | PHF3     | R.FYS*DSI | 0.9240167   | 1    | S1925 | 0.92 |
| IPI00170770.2 | 23469  | PHF3     | R.SSKS*F  | 0.49616549  | 0.96 | S680  | 1.08 |
| IPI00170770.2 | 23469  | PHF3     | K.STFS*P  | 0.684201094 | 0.96 | S1184 | 1.01 |
| IPI00170770.2 | 23469  | PHF3     | K.HSDNE   | 0.947647721 | 0.9  | S1178 | 1.02 |
| IPI00170770.2 | 23469  | PHF3     | K.STFSPA  | 0.604563646 | 0.96 | T1194 | 1.01 |
| IPI00170770.2 | 23469  | PHF3     | K.AKPVGS  | 0.566916624 | 0.98 | S283  | 1.04 |
| IPI00170770.2 | 23469  | PHF3     | R.KHSDNE  | 0.530774648 | 0.9  | S1163 | 0.98 |
| IPI00170770.2 | 23469  | PHF3     | R.KHS*DN  | 0.530774648 | 0.9  | S1148 | 0.98 |
| IPI00170770.2 | 23469  | PHF3     | R.KHSDNE  | 0.530774648 | 0.9  | S1154 | 0.98 |
| IPI00170770.2 | 23469  | PHF3     | R.RSS*KS  | 0.873506301 | 1    | S678  | 0.9  |
| IPI00170770.2 | 23469  | PHF3     | R.RS*SKS  | 0.932027377 | 1    | S677  | 0.92 |
| IPI00170770.2 | 23469  | PHF3     | R.RSSKS*  | 0.89791754  | 1    | S680  | 0.91 |
| IPI00170770.2 | 23469  | PHF3     | R.RSS*KS  | 0.89791754  | 1    | S678  | 0.91 |
| IPI00170778.2 | 23360  | FNBP4    | K.ATGGLC  | 2.92E-09    | 0.58 | S116  | 1.93 |
| IPI00170786.1 | 51729  | WBP11    | R.RRDEDM  | 0.021601024 | 0.92 | S237  | 1.1  |
| IPI00170805.1 | 10926  | DBF4     | K.YSVGSL  | 0.296993866 | 0.92 | S362  | 0.98 |
| IPI00170805.1 | 10926  | DBF4     | K.YSVGSL  | 0.401648339 | 0.96 | S359  | 1    |
| IPI00170805.1 | 10926  | DBF4     | R.IKYS*VC | 0.029596689 | 0.98 | S354  | 1.12 |
| IPI00170805.1 | 10926  | DBF4     | R.IKY*SV  | 0.015665801 | 0.98 | Y353  | 1.12 |
| IPI00170805.1 | 10926  | DBF4     | K.YSVGSL  | 0.431601138 | 0.92 | S359  | 1.1  |
| IPI00170935.1 | 57470  | LRR47    | K.EEGSLS  | 0.373234869 | 0.98 | S520  | 1.13 |
| IPI00170935.1 | 57470  | LRR47    | K.EEGS*LS | 0.373234869 | 0.98 | S518  | 1.13 |
| IPI00170935.1 | 57470  | LRR47    | K.YTLENK  | 0.951462987 | 0.86 | S520  | 1.04 |
| IPI00170935.1 | 57470  | LRR47    | K.EEGSLS  | 0.088241621 | 0.98 | T522  | 1.17 |
| IPI00171118.2 | 79759  | ZNF668   | R.THS*GE  | 0.941751315 | 0.9  | S275  | 1.16 |
| IPI00171217.1 | 445815 | PALM2-AK | K.GQKSPC  | 0.566916624 | 1    | S401  | 1.05 |
| IPI00171217.1 | 445815 | PALM2-AK | K.SEGDNY  | 0.769214181 | 0.92 | S226  | 0.89 |
| IPI00171217.1 | 445815 | PALM2-AK | K.GQKS*P  | 0.791231585 | 1    | S393  | 0.94 |
| IPI00171217.1 | 445815 | PALM2-AK | K.S*PGALI | 0.632655857 | 0.96 | S393  | 0.94 |
| IPI00171217.1 | 445815 | PALM2-AK | R.DGAEQC  | 0.818022374 | 0.77 | S630  | 1.05 |
| IPI00171217.1 | 445815 | PALM2-AK | R.TLS*MIE | 0.346340474 | 0.98 | S720  | 1.09 |
| IPI00171217.1 | 445815 | PALM2-AK | R.DALGDS  | 0.467835816 | 0.77 | S152  | 0.97 |
| IPI00171274.1 | 8897   | MTMR3    | R.RS*LELS | 0.181528891 | 0.96 | S647  | 1.24 |
| IPI00171460.1 | 5141   | PDE4A    | R.RES*FL  | 0.006469654 | 0.96 | S84   | 1.26 |

|               |                |           |             |            |      |
|---------------|----------------|-----------|-------------|------------|------|
| IPI00171460.1 | 5141 PDE4A     | R.S*PLGG  | 0.632655857 | 0.96 S148  | 1.06 |
| IPI00171475.1 | 84901 NFATC2IP | R.KLS*FFF | 0.32093792  | 0.9 S390   | 1.08 |
| IPI00171475.1 | 84901 NFATC2IP | K.HQTLEV  | 0.152571688 | 0.98 S369  | 1.19 |
| IPI00171475.1 | 84901 NFATC2IP | K.TEFLDLI | 0.009053635 | 0.94 S204  | 1.04 |
| IPI00171525.1 | 26168 SENP3    | K.NHLSPC  | 0.27446972  | 0.9 S181   | 1.03 |
| IPI00171525.1 | 26168 SENP3    | R.WT*PKS  | 0.530774648 | 0.9 T229   | 1.1  |
| IPI00171525.1 | 26168 SENP3    | K.NHLS*P  | 0.530774648 | 0.88 S169  | 0.93 |
| IPI00171525.1 | 26168 SENP3    | K.NHLSPC  | 0.463105648 | 0.88 T176  | 0.93 |
| IPI00171525.1 | 26168 SENP3    | K.ETIQGT  | 0.233505398 | 0.96 S25   | 1.03 |
| IPI00171525.1 | 26168 SENP3    | K.NHLS*P  | 0.431601138 | 0.96 S169  | 1.03 |
| IPI00171525.1 | 26168 SENP3    | R.WTPKS*  | 0.643675939 | 1 S232     | 1.05 |
| IPI00171749.5 | 79811 SLTM     | R.GS*GSC  | 0.463643297 | 0.88 S1019 | 0.77 |
| IPI00171749.5 | 79811 SLTM     | R.ISS*KS* | 0.27446972  | 1 S551     | 1.12 |
| IPI00171749.5 | 79811 SLTM     | R.GSGS*C  | 0.463643297 | 1 S1021    | 0.81 |
| IPI00171749.5 | 79811 SLTM     | R.AGAGMI  | 0.072926818 | 0.71 S1002 | 0.98 |
| IPI00171749.5 | 79811 SLTM     | R.IVQISGM | 0.751811379 | 0.77 S1014 | 1    |
| IPI00171749.5 | 79811 SLTM     | R.IS*SKS* | 0.106353987 | 1 S550     | 1.15 |
| IPI00171749.5 | 79811 SLTM     | K.S*PGHM  | 0.530774648 | 0.98 S553  | 1.03 |
| IPI00171798.1 | 9219 MTA2      | R.GHLSRF  | 0.431601138 | 0.98 S433  | 1.11 |
| IPI00171798.1 | 9219 MTA2      | R.GHLSRF  | 0.373234869 | 0.98 S435  | 1.02 |
| IPI00171798.1 | 9219 MTA2      | R.GHLSRF  | 0.27446972  | 0.98 Y437  | 1.12 |
| IPI00171798.1 | 9219 MTA2      | R.GHLSRF  | 0.431601138 | 1 T438     | 1.08 |
| IPI00172530.1 | 78999 LRFN4    | K.LSHVQS  | 0.985805237 | 0.66 T567  | 0.85 |
| IPI00172611.4 |                | R.GLNSQ   | 0.233505398 | 0.92 S115  | 1.04 |
| IPI00172611.4 |                | K.IREEELC | 0.054409842 | 0.53 S199  | 1.3  |
| IPI00172611.4 |                | R.SS*SMS  | 0.614059792 | 0.79 S127  | 1.09 |
| IPI00172611.4 |                | R.SSS*MS  | 0.324441898 | 0.96 S128  | 0.77 |
| IPI00173461.1 | 56704 JPH1     | R.RGS*LL  | 0.32093792  | 1 S216     | 1.12 |
| IPI00173901.1 | 64324 NSD1     | R.S*PGRG  | 0.643675939 | 0.94 S669  | 1.11 |
| IPI00173901.1 | 64324 NSD1     | K.SIGAASI | 0.459466751 | 0.77 S2105 | 0.79 |
| IPI00173901.1 | 64324 NSD1     | K.SIGAAS' | 0.637328432 | 0.88 S2100 | 0.9  |
| IPI00173946.5 | 85461 TANC1    | K.GVSMSL  | 0.096924105 | 0.92 S66   | 1.23 |
| IPI00173946.5 | 85461 TANC1    | R.HPASLT  | 0.966676636 | 1 S1665    | 0.97 |
| IPI00173946.5 | 85461 TANC1    | R.HPASLT  | 0.966676636 | 1 S1668    | 0.97 |
| IPI00174025.4 | 23268 DNMBP    | R.HETS*D  | 0.990159288 | 0.92 S342  | 0.92 |
| IPI00174962.2 | 85377 MICALL1  | R.KAS*ES' | 0.060044376 | 0.98 S309  | 1.22 |
| IPI00174962.2 | 85377 MICALL1  | K.SLHPWY  | 0.296993866 | 0.9 T469   | 1.04 |
| IPI00174962.2 | 85377 MICALL1  | K.SLHPWY  | 0.026666866 | 0.98 S470  | 1.18 |
| IPI00174962.2 | 85377 MICALL1  | K.SLHPWY  | 0.017448313 | 0.96 S471  | 1.1  |
| IPI00174962.2 | 85377 MICALL1  | R.VEQMP   | 0.463105648 | 0.83 S578  | 1.21 |
| IPI00174962.2 | 85377 MICALL1  | R.SPVPSP  | 0.463105648 | 0.98 S621  | 1.1  |
| IPI00175136.3 | 29890 RBM15B   | K.TLLISSL | 0.684201094 | 0.86 S147  | 1.02 |
| IPI00175136.3 | 29890 RBM15B   | R.SLS*PV/ | 0.296993866 | 0.98 S267  | 1.13 |
| IPI00175136.3 | 29890 RBM15B   | R.YPQQYC  | 0.786805188 | 0.94 S504  | 0.98 |
| IPI00175136.3 | 29890 RBM15B   | R.RNS*LE  | 0.91461637  | 0.96 S562  | 1.04 |
| IPI00175136.3 | 29890 RBM15B   | R.DRTPPF  | 0.214968943 | 0.98 S539  | 1.15 |
| IPI00175136.3 | 29890 RBM15B   | R.DRT*PP  | 0.214968943 | 0.98 T532  | 1.15 |
| IPI00175136.3 | 29890 RBM15B   | R.TFLEGD  | 0.214968943 | 0.98 S552  | 1    |
| IPI00175146.4 | 196441 CCDC131 | R.RIS*TSD | 0.296993866 | 0.53 S352  | 1.15 |
| IPI00175146.4 | 196441 CCDC131 | R.KPISDN  | 0.080258071 | 0.9 S1303  | 1.09 |
| IPI00175146.4 | 196441 CCDC131 | R.KPISDN  | 0.080258071 | 0.9 S1304  | 1.09 |

|               |        |          |           |             |      |       |      |
|---------------|--------|----------|-----------|-------------|------|-------|------|
| IPI00175146.4 | 196441 | CCDC131  | R.S*FLESM | 0.604563646 | 1    | S1046 | 1.03 |
| IPI00175146.4 | 196441 | CCDC131  | R.KPISDN! | 0.822525206 | 0.96 | S1303 | 0.99 |
| IPI00176532.1 | 57158  | JPH2     | R.QSVPYC  | 0.003916407 | 0.94 | S157  | 0.58 |
| IPI00176610.1 | 284672 | hCG_2028 | K.LNWLSV  | 0.497617381 | 0.45 | S113  | 0.77 |
| IPI00176637.5 | 728350 | LOC72835 | R.KKDAS*  | 0.566916624 | 0.86 | S67   | 1.3  |
| IPI00176642.3 | 9212   | AURKB    | R.RKT*MC  | 0.928728317 | 0.9  | T232  | 0.77 |
| IPI00176642.3 | 9212   | AURKB    | R.RKT*MC  | 0.928728317 | 0.9  | T232  | 0.77 |
| IPI00176642.3 | 9212   | AURKB    | R.KEPVT*I | 0.566916624 | 0.88 | T35   | 1.2  |
| IPI00177929.3 |        |          | R.ALENDF  | 5.40E-05    | 0.83 | S44   | 0.4  |
| IPI00177936.4 | 1837   | DTNA     | R.LRLEHE  | 0.005777772 | 0.98 | T152  | 1.46 |
| IPI00178047.4 | 27043  | PELP1    | R.GS*PDG  | 0.643675939 | 0.98 | S479  | 0.95 |
| IPI00178072.7 | 23384  | SPECC1L  | R.HS*ISGF | 0.463105648 | 0.98 | S887  | 1.07 |
| IPI00178072.7 | 23384  | SPECC1L  | R.HSIS*GF | 0.346340474 | 0.98 | S889  | 1.07 |
| IPI00178150.5 | 24137  | KIF4A    | R.RTFS*L1 | 0.116581414 | 0.98 | S801  | 1.26 |
| IPI00178150.5 | 24137  | KIF4A    | R.TFS*LTE | 0.181528891 | 1    | S801  | 1.19 |
| IPI00178150.5 | 24137  | KIF4A    | K.KT*PPAF | 0.643675939 | 0.98 | T1181 | 0.99 |
| IPI00178150.5 | 24137  | KIF4A    | K.T*PPAP  | 0.791231585 | 0.98 | T1181 | 0.98 |
| IPI00178150.5 | 24137  | KIF4A    | R.ALASNT  | 0.726073545 | 1    | S1225 | 1    |
| IPI00178302.5 | 80031  | SEMA6D   | K.RVDVPT  | 0.015402042 | 0.86 | S957  | 1.05 |
| IPI00178366.2 | 23362  | PSD3     | K.APSERP  | 0.040276449 | 0.88 | S380  | 1.06 |
| IPI00178366.2 | 23362  | PSD3     | K.APSERP  | 0.040276449 | 0.88 | T374  | 1.06 |
| IPI00178366.2 | 23362  | PSD3     | R.IGST*TN | 0.566916624 | 0.94 | T771  | 1    |
| IPI00178366.2 | 23362  | PSD3     | R.IGS*TTN | 0.253322457 | 0.94 | S770  | 1    |
| IPI00178366.2 | 23362  | PSD3     | R.IGSTT*N | 0.096924105 | 0.98 | T772  | 1.12 |
| IPI00178375.3 | 23262  | HISPPD1  | R.RRS*GE  | 0.000888315 | 0.98 | S1006 | 1.48 |
| IPI00178515.1 |        |          | K.SEFS*D/ | 0.076938277 | 0.66 | S812  | 0.77 |
| IPI00178714.2 | 10298  | PAK4     | K.S*LVGTI | 0.32093792  | 0.88 | S309  | 1.33 |
| IPI00178861.1 | 55621  | TRMT1    | R.GDQCC'  | 0.088241621 | 0.98 | S596  | 1.28 |
| IPI00178953.3 | 27332  | ZNF638   | K.IDLPEVC | 0.021601024 | 0.88 | S1100 | 1.06 |
| IPI00178953.3 | 27332  | ZNF638   | K.NYQSQA  | 0.530774648 | 1    | S383  | 1.02 |
| IPI00179071.1 | 23054  | NCOA6    | K.DVTLTS' | 0.708392237 | 0.52 | S884  | 0.63 |
| IPI00179121.4 | 8498   | RANBP3   | R.TS*SLTC | 0.839313928 | 0.66 | S57   | 0.87 |
| IPI00179121.4 | 8498   | RANBP3   | R.TSS*LTC | 0.839313928 | 0.66 | S58   | 0.87 |
| IPI00179121.4 | 8498   | RANBP3   | R.VLS*PPH | 0.181528891 | 1    | S265  | 1.17 |
| IPI00179326.7 | 55971  | BAIAP2L1 | K.TIFPHTA | 0.03637398  | 0.94 | S354  | 1    |
| IPI00179326.7 | 55971  | BAIAP2L1 | R.SVS*VA' | 0.233505398 | 0.88 | S331  | 1.09 |
| IPI00179326.7 | 55971  | BAIAP2L1 | K.TPASTP  | 0.32093792  | 1    | S261  | 1.14 |
| IPI00179438.4 | 1601   | DAB2     | K.QDLESS  | 0.181528891 | 0.88 | S423  | 0.95 |
| IPI00179438.4 | 1601   | DAB2     | K.SSPNPF  | 0.834430989 | 0.96 | S401  | 1    |
| IPI00179438.4 | 1601   | DAB2     | K.SS*PNPI | 0.463105648 | 0.69 | S394  | 0.93 |
| IPI00179757.4 | 10749  | KIF1C    | R.YPPYTT  | 0.166517367 | 0.98 | T1083 | 1.17 |
| IPI00179890.2 | 9908   | G3BP2    | K.NLEELE  | 0.026666866 | 0.9  | T226  | 1.32 |
| IPI00179890.2 | 9908   | G3BP2    | K.NLEELE  | 0.026666866 | 0.9  | S225  | 1.32 |
| IPI00180434.3 | 57655  | GRAMD1A  | R.GHVT*P  | 0.060044376 | 0.85 | T403  | 1.23 |
| IPI00180434.3 | 57655  | GRAMD1A  | R.ELWHLV  | 0.566916624 | 0.98 | S351  | 1.08 |
| IPI00180465.3 | 124790 | HEXIM2   | R.HDSGG'  | 0.660822982 | 0.71 | T46   | 0.73 |
| IPI00180764.3 | 11143  | MYST2    | R.HFS*ISC | 0.660822982 | 0.98 | S205  | 0.88 |
| IPI00180764.3 | 11143  | MYST2    | K.DMSLKC  | 0.430690939 | 0.96 | S167  | 0.84 |
| IPI00180764.3 | 11143  | MYST2    | K.DMSLKC  | 0.773594539 | 0.96 | S162  | 0.84 |
| IPI00180764.3 | 11143  | MYST2    | K.DMSLKC  | 0.773594539 | 0.96 | S164  | 0.84 |
| IPI00180764.3 | 11143  | MYST2    | K.VGS*PE  | 0.586469457 | 0.94 | S506  | 0.97 |

|               |                |           |             |            |      |
|---------------|----------------|-----------|-------------|------------|------|
| IPI00180764.3 | 11143 MYST2    | K.VGSPEF  | 0.586469457 | 0.94 S512  | 0.97 |
| IPI00181009.6 | 51112 TTC15    | R.APPASC  | 0.021601024 | 0.52 S165  | 1.02 |
| IPI00181352.2 | 1785 DNM2      | K.EALNIIG | 0.049260986 | 0.77 T762  | 1.22 |
| IPI00181352.2 | 1785 DNM2      | K.EALNIIG | 0.040276449 | 0.94 S757  | 1.3  |
| IPI00181641.5 | 56252 YLPM1    | R.GPASQF  | 0.401648339 | 0.98 S634  | 1.18 |
| IPI00181641.5 | 56252 YLPM1    | R.GPASQF  | 0.401648339 | 0.98 S630  | 1.18 |
| IPI00181684.4 | 23085 ERC1     | K.TFWS*P  | 0.818022374 | 0.98 S191  | 1.18 |
| IPI00181703.1 | 4215 MAP3K3    | R.HLS*VS  | 0.03282354  | 0.9 S197   | 1.5  |
| IPI00181856.3 | 63925 ZNF335   | R.TPVEAG  | 0.116581414 | 0.66 S418  | 0.98 |
| IPI00182478.2 | 7090 TLE3      | K.S*NTPTF | 0.197661257 | 0.96 S317  | 1.1  |
| IPI00182478.2 | 7090 TLE3      | K.KDAPTS  | 0.373234869 | 0.85 S286  | 1.06 |
| IPI00182478.2 | 7090 TLE3      | K.DAPTS*I | 0.566916624 | 0.88 S286  | 0.87 |
| IPI00182478.2 | 7090 TLE3      | K.DAPTS*I | 0.373234869 | 1 S286     | 1.05 |
| IPI00182540.4 | 1500 CTNND1    | R.YRPS*M  | 0.342305379 | 0.96 S244  | 0.94 |
| IPI00182540.4 | 1500 CTNND1    | R.GSLAS*I | 0.116581414 | 0.92 S349  | 0.96 |
| IPI00182540.4 | 1500 CTNND1    | R.GSLAS*I | 0.373234869 | 0.98 S349  | 1.08 |
| IPI00182540.4 | 1500 CTNND1    | R.S*MGYC  | 0.12765804  | 0.96 S288  | 1.12 |
| IPI00182540.4 | 1500 CTNND1    | R.VGGS*S  | 0.726073545 | 1 S268     | 1.03 |
| IPI00182540.4 | 1500 CTNND1    | R.SQSSH   | 0.900575286 | 0.94 S868  | 1.03 |
| IPI00182540.4 | 1500 CTNND1    | R.SQSSH   | 0.900575286 | 0.94 T869  | 1.03 |
| IPI00182540.4 | 1500 CTNND1    | R.LRS*YEI | 0.044561326 | 0.98 S320  | 1.21 |
| IPI00182540.4 | 1500 CTNND1    | R.HYEDG\  | 0.732417704 | 1 S230     | 0.99 |
| IPI00182540.4 | 1500 CTNND1    | R.HYEDG\  | 0.732417704 | 1 S232     | 0.99 |
| IPI00182980.2 | 27086 FOXP1    | R.RYS*DK  | 0.346340474 | 0.96 S364  | 0.97 |
| IPI00183229.5 | 57666 KIAA1545 | R.SRTT*PI | 0.000194095 | 0.77 T994  | 0.48 |
| IPI00183508.2 | 5756 TWF1      | R.S*SHFL  | 0.907673183 | 0.71 S9    | 1.05 |
| IPI00183530.2 | 6642 SNX1      | R.RFS*DFI | 0.000467805 | 0.76 S188  | 0.66 |
| IPI00183642.2 | 55609 SUHW3    | K.SEPHS*I | 0.296993866 | 1 S80      | 1.08 |
| IPI00183794.7 |                | R.S*RS*PE | 0.472044151 | 0.96 S305  | 0.9  |
| IPI00183794.7 |                | R.ENVEYII | 0.049260986 | 0.94 S120  | 1.21 |
| IPI00184317.2 | 8805 TRIM24    | K.SEWLDF  | 0.27446972  | 1 S774     | 1.15 |
| IPI00184317.2 | 8805 TRIM24    | K.SEWLDF  | 0.253322457 | 1 S777     | 1.15 |
| IPI00184330.5 | 4171 MCM2      | R.RGNDPL  | 0.12765804  | 0.69 S27   | 0.48 |
| IPI00184330.5 | 4171 MCM2      | R.GNDPLT  | 0.021601024 | 0.76 S27   | 1.45 |
| IPI00184330.5 | 4171 MCM2      | R.AIPELD/ | 0.566916624 | 0.88 S108  | 1.01 |
| IPI00184330.5 | 4171 MCM2      | R.RGLLYD  | 0.054409842 | 0.9 S139   | 1.32 |
| IPI00184330.5 | 4171 MCM2      | R.RTDALT  | 0.346340474 | 0.94 S41   | 1.08 |
| IPI00184330.5 | 4171 MCM2      | R.RTDALT  | 0.346340474 | 0.94 S40   | 1.08 |
| IPI00184330.5 | 4171 MCM2      | R.RTDALT  | 0.32093792  | 0.94 T59   | 1.23 |
| IPI00184330.5 | 4171 MCM2      | R.GLLYDS  | 0.152571688 | 1 S139     | 1.21 |
| IPI00184477.1 | 10243 GPHN     | K.EVHDEL  | 0.373234869 | 0.62 S188  | 0.94 |
| IPI00184477.1 | 10243 GPHN     | K.EVHDEL  | 0.253322457 | 0.9 S188   | 1.03 |
| IPI00184477.1 | 10243 GPHN     | K.EVHDEL  | 0.296993866 | 0.83 S188  | 0.99 |
| IPI00184477.1 | 10243 GPHN     | K.EVHDEL  | 0.214968943 | 0.98 S188  | 1.14 |
| IPI00184670.4 | 271 AMPD2      | R.S*LPGP/ | 0.044561326 | 0.98 S19   | 1.31 |
| IPI00184772.5 | 57572 DOCK6    | R.GSGRP/  | 0.139636808 | 0.94 Y874  | 1.13 |
| IPI00184772.5 | 57572 DOCK6    | R.INS*LTF | 0.863507405 | 0.96 S1308 | 0.93 |
| IPI00184772.5 | 57572 DOCK6    | R.GSGRP/  | 0.017448313 | 0.96 S872  | 1.06 |
| IPI00184772.5 | 57572 DOCK6    | R.RCSS*S  | 0.566916624 | 0.88 S41   | 0.94 |
| IPI00184772.5 | 57572 DOCK6    | R.RCSSSL  | 0.088241621 | 0.96 T48   | 1.23 |
| IPI00184772.5 | 57572 DOCK6    | R.RCS*SS  | 0.088241621 | 0.96 S40   | 1.23 |

|               |                |           |             |            |      |
|---------------|----------------|-----------|-------------|------------|------|
| IPI00185159.7 | 10458 BAIAP2   | K.LSDSYS  | 0.49616549  | 0.98 T340  | 0.99 |
| IPI00185159.7 | 10458 BAIAP2   | K.NSYATT  | 0.49616549  | 0.98 T360  | 1.01 |
| IPI00185361.4 | 57696 DDX55    | R.KREEGE  | 0.730331964 | 0.85 S544  | 1.01 |
| IPI00185371.4 | 151195 CCNYL1  | R.RSFS*AI | 0.283672925 | 0.81 S274  | 1.21 |
| IPI00185371.4 | 151195 CCNYL1  | R.RS*FSAI | 0.283672925 | 0.81 S272  | 1.21 |
| IPI00185371.4 | 151195 CCNYL1  | R.SFS*ADI | 0.566916624 | 0.74 S274  | 0.83 |
| IPI00185371.4 | 151195 CCNYL1  | K.S*NHLNI | 0.980510506 | 0.85 S35   | 1.08 |
| IPI00185769.2 | 9400 RECQL5    | K.YTGEEC  | 0.021601024 | 0.96 S815  | 1.14 |
| IPI00185769.2 | 9400 RECQL5    | R.GEVPGC  | 0.726073545 | 0.98 S727  | 1.07 |
| IPI00185919.3 | 23367 LARP1    | K.WTSQH   | 0.346340474 | 0.9 T1091  | 1.37 |
| IPI00185919.3 | 23367 LARP1    | R.KFDGVE  | 0.643675939 | 0.86 T376  | 0.92 |
| IPI00185919.3 | 23367 LARP1    | K.EGT*GQ  | 0.530774648 | 0.88 T68   | 0.99 |
| IPI00185919.3 | 23367 LARP1    | R.SLPTTV  | 0.760488858 | 0.96 S774  | 1.04 |
| IPI00185919.3 | 23367 LARP1    | K.GSESAT  | 0.106353987 | 0.88 T303  | 1.01 |
| IPI00185919.3 | 23367 LARP1    | K.EGTGQC  | 0.730331964 | 0.88 S75   | 0.8  |
| IPI00185919.3 | 23367 LARP1    | K.FDGVEC  | 0.766262183 | 0.96 T376  | 1    |
| IPI00185919.3 | 23367 LARP1    | K.GLS*ASI | 0.642010044 | 0.92 S546  | 0.87 |
| IPI00185919.3 | 23367 LARP1    | K.ILIVTQT | 0.990159288 | 0.83 T649  | 0.68 |
| IPI00185919.3 | 23367 LARP1    | K.GSESAT  | 0.902796178 | 0.98 T303  | 0.87 |
| IPI00185919.3 | 23367 LARP1    | K.NTFTAV  | 0.017448313 | 0.76 S627  | 0.95 |
| IPI00185919.3 | 23367 LARP1    | K.NTFTAV  | 0.346340474 | 0.94 S627  | 0.96 |
| IPI00185919.3 | 23367 LARP1    | R.TASIS*S | 2.12E-12    | 0.96 S849  | 0.27 |
| IPI00185919.3 | 23367 LARP1    | R.TASIS*S | 2.12E-12    | 0.96 S849  | 0.27 |
| IPI00185919.3 | 23367 LARP1    | K.NTFTAV  | 0.966676636 | 0.98 S627  | 0.91 |
| IPI00185919.3 | 23367 LARP1    | R.T*AS*IS | 0.072926818 | 0.96 T845  | 0.99 |
| IPI00185919.3 | 23367 LARP1    | K.EGTGQC  | 0.660822982 | 0.62 S75   | 0.94 |
| IPI00185919.3 | 23367 LARP1    | R.TASISS* | 0.000160239 | 0.5 S850   | 0.97 |
| IPI00185919.3 | 23367 LARP1    | K.GLSAS*I | 0.623338592 | 0.98 S548  | 0.86 |
| IPI00185919.3 | 23367 LARP1    | R.HSS*NP  | 0.566916624 | 0.98 S824  | 1.02 |
| IPI00185919.3 | 23367 LARP1    | R.HSSNPF  | 0.566916624 | 0.98 S830  | 1.02 |
| IPI00185919.3 | 23367 LARP1    | R.ES*PRP  | 0.684201094 | 1 S75      | 1.04 |
| IPI00185919.3 | 23367 LARP1    | R.HS*SNP  | 0.566916624 | 1 S823     | 1.04 |
| IPI00185919.3 | 23367 LARP1    | R.HSSNPF  | 0.566916624 | 1 S838     | 1.04 |
| IPI00185919.3 | 23367 LARP1    | R.AVT*PVI | 0.873506301 | 1 T526     | 0.89 |
| IPI00185919.3 | 23367 LARP1    | K.NALPPV  | 0.698823319 | 0.98 S143  | 0.81 |
| IPI00185919.3 | 23367 LARP1    | R.S*LPTTV | 0.054409842 | 1 S766     | 1.35 |
| IPI00185919.3 | 23367 LARP1    | R.ESPRPL  | 0.566916624 | 1 S90      | 1.04 |
| IPI00185919.3 | 23367 LARP1    | R.S*LPTTV | 0.438828959 | 1 S766     | 0.82 |
| IPI00186526.5 | 5863 RGL2      | R.LLLDTS' | 0.32093792  | 0.85 S13   | 1.11 |
| IPI00186554.4 | 84530 KIAA1853 | R.GVIT*GE | 0.075572151 | 0.92 T259  | 0.71 |
| IPI00186968.3 | 63967 CLSPN    | R.NFVFHT  | 0.152571688 | 0.94 S1289 | 1.16 |
| IPI00186968.3 | 63967 CLSPN    | R.SPS*PG  | 0.049260986 | 0.72 S810  | 1.08 |
| IPI00186968.3 | 63967 CLSPN    | K.LSEPSLI | 0.346340474 | 0.74 S846  | 1.12 |
| IPI00187011.4 | 23211 C19orf7  | R.AAKPGF  | 0.233505398 | 0.94 S1110 | 1.17 |
| IPI00187011.4 | 23211 C19orf7  | R.AAKPGF  | 0.139636808 | 1 S1104    | 1.21 |
| IPI00187011.4 | 23211 C19orf7  | R.AAKPGF  | 0.296993866 | 1 S1104    | 1.13 |
| IPI00187011.4 | 23211 C19orf7  | R.AAKPGF  | 0.27446972  | 1 T1106    | 1.14 |
| IPI00215637.4 | 1654 DDX3X     | R.FS*GGF  | 0           | 0.92 S594  | 9.53 |
| IPI00215637.4 | 1654 DDX3X     | R.GCHLLV  | 0.383343176 | 0.64 T323  | 0.74 |
| IPI00215637.4 | 1654 DDX3X     | K.SSRFS*( | 0.849082022 | 1 S594     | 0.88 |
| IPI00215637.4 | 1654 DDX3X     | K.SS*RFS( | 0.849082022 | 1 S591     | 0.88 |

|                |       |         |           |             |      |       |      |
|----------------|-------|---------|-----------|-------------|------|-------|------|
| IPI00215675.1  | 23648 | SSBP3   | K.NS*PNN  | 0.214968943 | 0.66 | S320  | 1.21 |
| IPI00215675.1  | 23648 | SSBP3   | K.NSPNNI  | 0.096924105 | 1    | T333  | 1.4  |
| IPI00215675.1  | 23648 | SSBP3   | K.NS*PNN  | 0.233505398 | 0.98 | S320  | 1.14 |
| IPI00215675.1  | 23648 | SSBP3   | K.NSPNNI  | 0.214968943 | 1    | S325  | 1.14 |
| IPI00215768.2  | 2729  | GCLC    | -.GLLSQG  | 0.233505398 | 0.86 | S8    | 1.13 |
| IPI00215772.1  | 4286  | MITF    | R.AHGLSL  | 0.902796178 | 0.98 | S301  | 0.92 |
| IPI00215795.1  | 56848 | SPHK2   | R.SRS*PS  | 0.743182508 | 0.96 | S71   | 1.08 |
| IPI00215795.1  | 56848 | SPHK2   | R.S*RSPS  | 0.743182508 | 0.96 | S69   | 1.08 |
| IPI00215801.1  | 9584  | RBM39   | R.YRS*PY  | 0.166517367 | 1    | S97   | 1.16 |
| IPI00215801.1  | 9584  | RBM39   | K.DKS*PVI | 0.373234869 | 0.9  | S136  | 1.1  |
| IPI00215801.1  | 9584  | RBM39   | R.KDKS*P' | 0.12765804  | 0.98 | S136  | 1.15 |
| IPI00215801.1  | 9584  | RBM39   | K.DKSPVR  | 0.197661257 | 1    | T146  | 1.14 |
| IPI00215877.2  | 324   | APC     | R.TPFSS*  | 0.373234869 | 0.96 | S2663 | 1.09 |
| IPI00215877.2  | 324   | APC     | R.TPFSS   | 0.373234869 | 0.96 | S2667 | 1.09 |
| IPI00215877.2  | 324   | APC     | R.SHS*ES  | 0.431601138 | 0.77 | S2432 | 1.18 |
| IPI00215877.2  | 324   | APC     | K.SGISLG  | 0.566916624 | 0.92 | S2045 | 1.01 |
| IPI00215877.2  | 324   | APC     | R.SGRSPT  | 0.12765804  | 0.96 | T2578 | 1.05 |
| IPI00215877.2  | 324   | APC     | K.AIQEGA  | 0.431601138 | 0.98 | S2024 | 1.03 |
| IPI00215877.2  | 324   | APC     | R.SGRS*P  | 0.166517367 | 0.98 | S2573 | 1.05 |
| IPI00215877.2  | 324   | APC     | R.S*GRSP  | 0.166517367 | 0.98 | S2570 | 1.05 |
| IPI00215877.2  | 324   | APC     | K.RHSGSY  | 0.401648339 | 1    | Y2737 | 1.08 |
| IPI00215877.2  | 324   | APC     | K.RHS*GS  | 0.401648339 | 1    | S2734 | 1.08 |
| IPI00215884.3  | 6426  | SFRS1   | K.VDGPRE  | 0.181528891 | 1    | S199  | 1.17 |
| IPI00215888.3  | 6731  | SRP72   | K.TVSS*PF | 0.296993866 | 0.96 | S621  | 1.13 |
| IPI00215888.3  | 6731  | SRP72   | K.TVS*SPF | 0.296993866 | 0.96 | S620  | 1.12 |
| IPI00215888.3  | 6731  | SRP72   | K.TVSS*PF | 0.233505398 | 1    | S621  | 1.18 |
| IPI00215928.4  | 1069  | CETN2   | K.RMSPKF  | 0.49616549  | 0.98 | T26   | 1.1  |
| IPI00215928.4  | 1069  | CETN2   | K.RMS*PK  | 0.096924105 | 0.98 | S20   | 1.1  |
| IPI00216040.1  | 898   | CCNE1   | K.AMLSEC  | 0.017448313 | 0.81 | S344  | 1.72 |
| IPI00216047.3  | 6601  | SMARCC2 | K.DMDEPS  | 0.49616549  | 0.92 | S347  | 1.08 |
| IPI00216053.1  | 4209  | MEF2D   | R.RAS*EE  | 0.197661257 | 0.94 | S121  | 1.12 |
| IPI00216130.7  | 11054 | OGFR    | R.PAGPAC  | 0.060044376 | 0.98 | S557  | 1.38 |
| IPI00216130.7  | 11054 | OGFR    | R.KVDEG/  | 0.401648339 | 0.98 | S488  | 1.18 |
| IPI00216130.7  | 11054 | OGFR    | R.KVDEG/  | 0.401648339 | 0.98 | S484  | 1.18 |
| IPI00216159.13 | 9945  | GFPT2   | K.RLDS*S/ | 0.044561326 | 1    | S244  | 1.32 |
| IPI00216159.13 | 9945  | GFPT2   | K.RLDSS*) | 0.044561326 | 1    | S245  | 1.32 |
| IPI00216190.1  | 2932  | GSK3B   | R.TTS*FAE | 0.27446972  | 0.94 | S9    | 1.29 |
| IPI00216219.3  | 7082  | TJP1    | R.IDS*PGF | 0.726073545 | 0.96 | S912  | 0.97 |
| IPI00216219.3  | 7082  | TJP1    | K.KVQIPV  | 0.166517367 | 0.94 | Y132  | 1.11 |
| IPI00216219.3  | 7082  | TJP1    | R.IDS*PGF | 0.791231585 | 1    | S912  | 0.96 |
| IPI00216219.3  | 7082  | TJP1    | K.S*REDL  | 0.614059792 | 0.86 | S617  | 1.17 |
| IPI00216219.3  | 7082  | TJP1    | R.LEEPTP  | 0.116581414 | 0.81 | S966  | 1.04 |
| IPI00216219.3  | 7082  | TJP1    | R.LEEPTP  | 0.116581414 | 0.81 | S968  | 1.04 |
| IPI00216219.3  | 7082  | TJP1    | K.KVQIPV  | 0.116581414 | 0.98 | S125  | 1.24 |
| IPI00216219.3  | 7082  | TJP1    | K.VQIPVSI | 0.809048575 | 0.9  | Y132  | 1.2  |
| IPI00216219.3  | 7082  | TJP1    | K.KVQIPV  | 0.233505398 | 0.98 | S125  | 1.16 |
| IPI00216219.3  | 7082  | TJP1    | K.AIPVSP  | 0.99978897  | 0.86 | S1619 | 0.81 |
| IPI00216219.3  | 7082  | TJP1    | K.AIPV*S  | 0.99978897  | 0.86 | S1617 | 0.81 |
| IPI00216219.3  | 7082  | TJP1    | K.VQIPVSI | 0.463105648 | 0.94 | S125  | 1.16 |
| IPI00216219.3  | 7082  | TJP1    | K.KVQIPV  | 0.181528891 | 1    | S125  | 1.12 |
| IPI00216219.3  | 7082  | TJP1    | K.VQIPVSI | 0.346340474 | 0.98 | S125  | 1.14 |

|               |               |           |             |      |       |      |
|---------------|---------------|-----------|-------------|------|-------|------|
| IPI00216219.3 | 7082 TJP1     | K.VQIPVSI | 0.346340474 | 0.98 | S131  | 1.14 |
| IPI00216230.2 | 7112 TMPO     | K.FQETEF  | 0.49616549  | 0.85 | S424  | 0.99 |
| IPI00216230.2 | 7112 TMPO     | K.SVEERC  | 0.530774648 | 0.72 | S444  | 1.06 |
| IPI00216230.2 | 7112 TMPO     | K.HAS*PIL | 0.463105648 | 0.94 | S306  | 0.95 |
| IPI00216230.2 | 7112 TMPO     | K.GPPDFS  | 1.04E-09    | 0.77 | S66   | 2.72 |
| IPI00216230.2 | 7112 TMPO     | K.GPPDFS  | 1.04E-09    | 0.77 | S67   | 2.72 |
| IPI00216230.2 | 7112 TMPO     | R.SHISDQ  | 0.891255812 | 1    | S351  | 1.05 |
| IPI00216230.2 | 7112 TMPO     | K.SSSSSS  | 0.401648339 | 0.98 | S310  | 1.09 |
| IPI00216230.2 | 7112 TMPO     | K.GAAGRF  | 0.253322457 | 0.98 | S378  | 1.08 |
| IPI00216230.2 | 7112 TMPO     | K.GPPDFS  | 0.545847833 | 0.79 | T74   | 1.22 |
| IPI00216230.2 | 7112 TMPO     | K.GPPDFS  | 0.373234869 | 0.76 | S66   | 0.84 |
| IPI00216230.2 | 7112 TMPO     | K.FQETEF  | 0.401648339 | 0.98 | S424  | 1.06 |
| IPI00216241.1 | 8650 NUMB     | K.EIAATCS | 0.769214181 | 0.9  | S414  | 0.97 |
| IPI00216241.1 | 8650 NUMB     | K.IVVGSS\ | 0.684201094 | 0.96 | S229  | 1.04 |
| IPI00216245.2 | 9414 TJP2     | R.SILKPST | 0.12765804  | 0.96 | S1044 | 1.18 |
| IPI00216245.2 | 9414 TJP2     | R.SILKPST | 0.106353987 | 0.94 | S1045 | 1.09 |
| IPI00216245.2 | 9414 TJP2     | R.KVQVA\  | 0.197661257 | 0.96 | S107  | 1.03 |
| IPI00216245.2 | 9414 TJP2     | R.DNS*PP  | 0.233505398 | 0.98 | S963  | 1.13 |
| IPI00216252.4 | 23095 KIF1B   | R.GDS*LIL | 0.011556994 | 0.76 | S1441 | 0.42 |
| IPI00216277.1 | 79109 MAPKAP1 | R.RTS*FSI | 0.00181541  | 1    | S474  | 1.22 |
| IPI00216306.1 | 5209 PFKFB3   | R.RNS*VT  | 0.040276449 | 1    | S461  | 1.3  |
| IPI00216337.1 | 26088 GGA1    | R.DPLPGF  | 0           | 0.96 | S513  | 0.01 |
| IPI00216354.3 | 776 CACNA1D   | R.GTRLPL  | 0.463105648 | 1    | S45   | 1.07 |
| IPI00216396.2 | 1390 CREM     | R.APTAAL  | 0.530774648 | 0.96 | S50   | 1.04 |
| IPI00216396.2 | 1390 CREM     | R.APTAAL  | 0.49616549  | 1    | S47   | 1.06 |
| IPI00216396.2 | 1390 CREM     | R.APTAAL  | 0.431601138 | 1    | S47   | 1.07 |
| IPI00216408.2 | 23348 DOCK9   | R.ALS*KPC | 0.03637398  | 0.94 | S21   | 1.33 |
| IPI00216408.2 | 23348 DOCK9   | K.SNS*LDI | 0.166517367 | 0.98 | S1275 | 1    |
| IPI00216408.2 | 23348 DOCK9   | K.S*NSLDI | 0.166517367 | 0.98 | S1273 | 1    |
| IPI00216442.4 |               | K.TDS*PW  | 0.684201094 | 0.94 | S404  | 1.07 |
| IPI00216445.1 | 7852 CXCR4    | K.TSAQHA  | 0.296993866 | 0.98 | S328  | 1.08 |
| IPI00216445.1 | 7852 CXCR4    | K.TSAQHA  | 0.401648339 | 0.36 | S323  | 0.09 |
| IPI00216613.1 | 6421 SFPQ     | R.S*PPPG  | 0.643675939 | 0.85 | S33   | 1.11 |
| IPI00216613.1 | 6421 SFPQ     | R.GMGPG   | 0.197968259 | 0.98 | T687  | 0.86 |
| IPI00216686.1 | 2305 FOXM1    | K.LLFGEG  | 0.080258071 | 0.85 | S436  | 1.18 |
| IPI00216686.1 | 2305 FOXM1    | R.LLSSEP  | 0.985805237 | 0.76 | S689  | 0.77 |
| IPI00216686.1 | 2305 FOXM1    | R.LLSSEP  | 0.604563646 | 0.96 | S678  | 0.96 |
| IPI00216686.1 | 2305 FOXM1    | R.LLSSEP  | 0.604563646 | 0.96 | S677  | 0.96 |
| IPI00216688.4 | 4928 NUP98    | K.TRS*LV  | 0.976229102 | 0.38 | S1026 | 0.57 |
| IPI00216688.4 | 4928 NUP98    | R.CLIKS*P | 0.49616549  | 0.9  | S822  | 0.95 |
| IPI00216688.4 | 4928 NUP98    | K.FTSGAF  | 0.604563646 | 0.94 | S1043 | 1    |
| IPI00216688.4 | 4928 NUP98    | K.FTSGAF  | 0.604563646 | 0.94 | S1043 | 1    |
| IPI00216688.4 | 4928 NUP98    | K.FTSGAF  | 0.001080861 | 0.66 | T1053 | 0.64 |
| IPI00216688.4 | 4928 NUP98    | K.ALTT*PT | 0.726073545 | 1    | T529  | 1    |
| IPI00216688.4 | 4928 NUP98    | R.FS*FLS* | 0.00322629  | 0.62 | S618  | 0.87 |
| IPI00216688.4 | 4928 NUP98    | R.FSFLS*F | 0.809048575 | 0.9  | S621  | 1.06 |
| IPI00216688.4 | 4928 NUP98    | K.PVDEN*  | 0.27446972  | 0.59 | S636  | 0.61 |
| IPI00216688.4 | 4928 NUP98    | K.NLNNSN  | 0.32797409  | 0.29 | S595  | 0.64 |
| IPI00216695.1 | 9031 BAZ1B    | R.RQS*LE  | 0.566916624 | 0.98 | S1338 | 1.02 |
| IPI00216695.1 | 9031 BAZ1B    | R.RSDVQE  | 0.604820989 | 0.64 | S704  | 1.06 |
| IPI00216695.1 | 9031 BAZ1B    | K.NSKS*PI | 0.00043002  | 0.83 | S361  | 0.86 |

|               |                 |             |             |      |       |      |
|---------------|-----------------|-------------|-------------|------|-------|------|
| IPI00216746.1 | 3190 HNRPK      | K.KIIPTLEI  | 0.684201094 | 0.9  | T118  | 0.91 |
| IPI00216746.1 | 3190 HNRPK      | K.IILDLISE  | 0.296993866 | 0.94 | S216  | 1.14 |
| IPI00216746.1 | 3190 HNRPK      | K.IILDLISE  | 0.530774648 | 1    | S216  | 1.13 |
| IPI00216746.1 | 3190 HNRPK      | K.IILDLISE* | 0.530774648 | 1    | S214  | 1.13 |
| IPI00216746.1 | 3190 HNRPK      | K.KIIPTLEI  | 0.726073545 | 0.88 | T120  | 0.98 |
| IPI00216746.1 | 3190 HNRPK      | K.KIIPTLEI  | 0.738886535 | 1    | S116  | 0.96 |
| IPI00216746.1 | 3190 HNRPK      | R.GS*YGD    | 0.27446972  | 1    | S379  | 1.05 |
| IPI00216746.1 | 3190 HNRPK      | R.GSY*GD    | 0.27446972  | 1    | Y380  | 1.05 |
| IPI00216746.1 | 3190 HNRPK      | K.IIPTLEE   | 0.253322457 | 1    | S116  | 1.19 |
| IPI00216746.1 | 3190 HNRPK      | K.IIPTLEE   | 0.181528891 | 1    | T118  | 1.19 |
| IPI00216768.1 | 8622 PDE8B      | R.IHS*MTI   | 6.68E-07    | 0.94 | S349  | 1.15 |
| IPI00216768.1 | 8622 PDE8B      | R.RLS*GN    | 0.566916624 | 0.96 | S420  | 1.08 |
| IPI00216911.1 | 6929 TCF3       | K.ALASIYS   | 0.73460299  | 0.9  | S354  | 1.03 |
| IPI00216911.1 | 6929 TCF3       | R.AGAPG/    | 0.066203153 | 0.96 | Y382  | 1.06 |
| IPI00216911.1 | 6929 TCF3       | R.AGAPG/    | 0.214968943 | 1    | S379  | 1.08 |
| IPI00216911.1 | 6929 TCF3       | R.AGAPG/    | 0.214968943 | 1    | S381  | 1.13 |
| IPI00216919.1 | 10413 YAP1      | R.QAS*TD    | 0.49616549  | 0.88 | S109  | 1.39 |
| IPI00216919.1 | 10413 YAP1      | R.GDS*ET    | 0.401648339 | 0.77 | S61   | 1.2  |
| IPI00216953.1 | 4000 LMNA       | R.LQLELS    | 0.900575286 | 0.77 | S107  | 1.02 |
| IPI00216953.1 | 4000 LMNA       | R.SGAQA     | 0.001128958 | 0.92 | S22   | 1.33 |
| IPI00216953.1 | 4000 LMNA       | R.S*VGGS    | 0.463105648 | 0.88 | S598  | 1.16 |
| IPI00216953.1 | 4000 LMNA       | R.LRLS*P    | 0.431601138 | 1    | S390  | 1.11 |
| IPI00216953.1 | 4000 LMNA       | R.LRLS*P    | 0.04505155  | 0.69 | S390  | 0.71 |
| IPI00216953.1 | 4000 LMNA       | R.LRLS*P    | 0.637328432 | 0.69 | S390  | 0.71 |
| IPI00216993.1 | 9815 GIT2       | R.QRS*MV    | 0.878390339 | 0.83 | S564  | 0.82 |
| IPI00217052.4 | 89797 NAV2      | K.VNPAAC    | 0.060044376 | 0.98 | S1302 | 1.33 |
| IPI00217052.4 | 89797 NAV2      | K.NSVVISI   | 0.116581414 | 0.96 | S1376 | 1.13 |
| IPI00217052.4 | 89797 NAV2      | R.APSQVS    | 0.080258071 | 0.94 | S1977 | 1.29 |
| IPI00217121.1 | 126353 C19orf21 | R.HLS*ES    | 0.346340474 | 0    | S471  | 0.42 |
| IPI00217121.1 | 126353 C19orf21 | R.KSSTVA    | 4.62E-06    | 0.9  | T160  | 1.13 |
| IPI00217121.1 | 126353 C19orf21 | R.KS*STV/   | 0.12765804  | 1    | S155  | 1.19 |
| IPI00217121.1 | 126353 C19orf21 | R.KSS*TV/   | 0.12765804  | 1    | S156  | 1.19 |
| IPI00217121.1 | 126353 C19orf21 | R.HLSESS    | 0.346340474 | 1    | S474  | 1.04 |
| IPI00217121.1 | 126353 C19orf21 | R.ALSS*D    | 0.373234869 | 0.92 | S395  | 1.12 |
| IPI00217124.5 | 8844 KSR1       | R.SIS*VSA   | 0.007240509 | 0.98 | S92   | 1.34 |
| IPI00217124.5 | 8844 KSR1       | R.ALHSFIT   | 0.463105648 | 0.85 | T133  | 0.96 |
| IPI00217124.5 | 8844 KSR1       | R.SISVSAL   | 0.296993866 | 0.94 | T103  | 1.18 |
| IPI00217124.5 | 8844 KSR1       | R.SIS*VSA   | 0.03282354  | 0.98 | S92   | 1.34 |
| IPI00217124.5 | 8844 KSR1       | R.ALHSFIT   | 0.296993866 | 1    | T133  | 1.15 |
| IPI00217124.5 | 8844 KSR1       | R.AAEPHF    | 0.89791754  | 0.98 | T288  | 0.99 |
| IPI00217124.5 | 8844 KSR1       | R.RTES*VI   | 0.952395062 | 0.92 | S269  | 1.23 |
| IPI00217157.4 | 83479 DDX59     | R.HISESCI   | 0.566916624 | 0.53 | S64   | 0.82 |
| IPI00217223.1 | 10606 PAICS     | K.EVYELLI   | 0.214968943 | 0.88 | S53   | 1.03 |
| IPI00217223.1 | 10606 PAICS     | K.TKEVYE    | 0.214968943 | 0.98 | S53   | 1.01 |
| IPI00217240.1 | 84128 WDR75     | K.VQDTSN    | 0.05184847  | 0.88 | T798  | 0.92 |
| IPI00217240.1 | 84128 WDR75     | K.VQDTS*    | 0.05184847  | 0.88 | S796  | 0.92 |
| IPI00217261.2 | 55852 TEX2      | R.RLS*EVI   | 0.27446972  | 0.9  | S295  | 1.05 |
| IPI00217261.2 | 55852 TEX2      | K.EDLYLE    | 0.89791754  | 0.94 | S91   | 1.07 |
| IPI00217340.1 | 23286 WWC1      | R.TDRGS*    | 0.024009318 | 0.86 | S255  | 1.22 |
| IPI00217340.1 | 23286 WWC1      | K.VDKETN    | 0.253322457 | 0.98 | T893  | 1.14 |
| IPI00217340.1 | 23286 WWC1      | K.VDKETN    | 0.253322457 | 0.98 | T895  | 1.14 |



|               |               |           |             |            |      |
|---------------|---------------|-----------|-------------|------------|------|
| IPI00217340.1 | 23286 WWC1    | K.VDKETN  | 0.181528891 | 0.94 T895  | 1.02 |
| IPI00217340.1 | 23286 WWC1    | R.SKT*FSF | 0.001613065 | 0.9 T929   | 1.19 |
| IPI00217354.3 | 55738 ARFGAP1 | K.TRKSPS  | 0.214968943 | 0.96 T358  | 0.97 |
| IPI00217354.3 | 55738 ARFGAP1 | K.TRKSPS  | 0.214968943 | 0.96 S353  | 0.97 |
| IPI00217354.3 | 55738 ARFGAP1 | K.TRKSPS  | 0.214968943 | 0.96 S356  | 0.97 |
| IPI00217354.3 | 55738 ARFGAP1 | R.YVGFGM  | 0.373234869 | 0.86 T189  | 0.97 |
| IPI00217354.3 | 55738 ARFGAP1 | R.EWSLES  | 0.015665801 | 0.96 T135  | 1.39 |
| IPI00217354.3 | 55738 ARFGAP1 | R.EWSLES  | 0.01011525  | 0.96 S129  | 1.38 |
| IPI00217357.2 | 55749 CCAR1   | K.VMLMAE  | 0.804577835 | 0.92 S456  | 1.12 |
| IPI00217357.2 | 55749 CCAR1   | K.EIST*PT | 0.604563646 | 1 T627     | 1.04 |
| IPI00217413.3 | 54505 DHX29   | K.FQSPQI  | 0.530774648 | 0.88 S200  | 0.97 |
| IPI00217418.3 | 94134 ARHGAP1 | R.ATTPPN  | 0.12765804  | 0.98 S240  | 1.27 |
| IPI00217418.3 | 94134 ARHGAP1 | R.S*FGHF  | 0.32093792  | 0.96 S176  | 1.11 |
| IPI00217449.1 | 2969 GTF2I    | R.T*NTPVI | 0.431601138 | 0.96 T515  | 1.24 |
| IPI00217449.1 | 2969 GTF2I    | R.TNT*PVI | 0.643675939 | 0.86 T517  | 1.04 |
| IPI00217449.1 | 2969 GTF2I    | R.VMVTDA  | 0.766262183 | 0.79 S207  | 0.71 |
| IPI00217449.1 | 2969 GTF2I    | R.SPS*WY  | 0.730331964 | 0.69 S476  | 0.74 |
| IPI00217449.1 | 2969 GTF2I    | R.S*PSWY  | 0.730331964 | 0.69 S495  | 0.74 |
| IPI00217449.1 | 2969 GTF2I    | R.TPT*QTI | 0.431601138 | 0.98 T685  | 1.05 |
| IPI00217449.1 | 2969 GTF2I    | K.EESED   | 0.096924105 | 0.98 S278  | 1.24 |
| IPI00217449.1 | 2969 GTF2I    | R.SILSPG  | 0.463105648 | 0.98 S214  | 1.08 |
| IPI00217449.1 | 2969 GTF2I    | R.GREFS*  | 0.253322457 | 1 S681     | 1.09 |
| IPI00217449.1 | 2969 GTF2I    | R.KINSSPI | 0.566916624 | 0.5 T817   | 0.75 |
| IPI00217449.1 | 2969 GTF2I    | R.KINSS*F | 0.643675939 | 0.52 S790  | 0.66 |
| IPI00217449.1 | 2969 GTF2I    | R.KINS*SF | 0.643675939 | 0.52 S810  | 0.66 |
| IPI00217449.1 | 2969 GTF2I    | R.SPGS*N  | 0.643675939 | 0.94 S636  | 1.06 |
| IPI00217449.1 | 2969 GTF2I    | K.VPEIEV  | 0.346340474 | 0.98 S679  | 1.06 |
| IPI00217449.1 | 2969 GTF2I    | R.SILS*PG | 0.604563646 | 1 S210     | 1.04 |
| IPI00217467.2 | 3008 HIST1H1E | -.SETAPA  | 0.346340474 | 0.96 T18   | 1.03 |
| IPI00217467.2 | 3008 HIST1H1E | R.KAS*GP  | 0.604563646 | 0.96 S36   | 1.03 |
| IPI00217467.2 | 3008 HIST1H1E | -.SETAPA  | 0.49616549  | 1 T18      | 1.04 |
| IPI00217468.2 | 3009 HIST1H1B | -.SETAPAE | 0.066203153 | 0.92 S18   | 1.03 |
| IPI00217468.2 | 3009 HIST1H1B | -.SET*APA | 0.27446972  | 0.98 T4    | 1    |
| IPI00217564.1 | 905 CCNT2     | K.QGQSQ   | 0.002581506 | 0.88 S480  | 1.19 |
| IPI00217564.1 | 905 CCNT2     | K.HSADGI  | 0.604563646 | 0.96 T597  | 1.04 |
| IPI00217564.1 | 905 CCNT2     | K.HSADGI  | 0.463105648 | 0.94 S601  | 1.01 |
| IPI00217661.3 | 125950 RAVER1 | K.DSGPLP  | 0.346340474 | 0.86 T505  | 0.87 |
| IPI00217661.3 | 125950 RAVER1 | R.LLS*PLS | 0.253322457 | 1 S584     | 1.16 |
| IPI00217686.3 | 117246 FTSJ3  | K.QQLPQT  | 0.985337202 | 0.96 T573  | 1.09 |
| IPI00217686.3 | 117246 FTSJ3  | R.ILDPEGI | 0.021601024 | 0.76 S676  | 0.96 |
| IPI00217686.3 | 117246 FTSJ3  | R.ILDPEGI | 0.021601024 | 0.76 S677  | 0.96 |
| IPI00217709.1 | 7155 TOP2B    | K.SQDFGM  | 0.604563646 | 0.94 Y1448 | 0.95 |
| IPI00217709.1 | 7155 TOP2B    | K.VKAS*PI | 0.026666866 | 0.52 S1395 | 0.79 |
| IPI00217709.1 | 7155 TOP2B    | K.KVVEAV  | 0.205975059 | 0.85 S1519 | 0.83 |
| IPI00217709.1 | 7155 TOP2B    | K.KLQLEE  | 0.604563646 | 0.98 S1231 | 1.04 |
| IPI00217709.1 | 7155 TOP2B    | K.SQDFGM  | 0.822525206 | 0.98 S1452 | 0.93 |
| IPI00217709.1 | 7155 TOP2B    | K.SQDFGM  | 0.822525206 | 0.98 S1449 | 0.93 |
| IPI00217709.1 | 7155 TOP2B    | K.FDSNEE  | 0.346340474 | 0.96 S1466 | 1.03 |
| IPI00217709.1 | 7155 TOP2B    | K.FDS*NEI | 0.346340474 | 0.96 S1461 | 1.03 |
| IPI00217709.1 | 7155 TOP2B    | K.KVVEAV  | 0.394935546 | 0.94 S1519 | 0.99 |
| IPI00217709.1 | 7155 TOP2B    | K.VVEAVN  | 0.726073545 | 1 S1519    | 1.06 |

|               |                |           |             |            |       |
|---------------|----------------|-----------|-------------|------------|-------|
| IPI00217709.1 | 7155 TOP2B     | K.VVEAVN  | 0.726073545 | 1 S1521    | 1.06  |
| IPI00217709.1 | 7155 TOP2B     | K.VKAS*PI | 0.253322457 | 0.98 S1395 | 1.01  |
| IPI00217709.1 | 7155 TOP2B     | K.TSFDQC  | 0.858851798 | 0.96 S1576 | 1.13  |
| IPI00217709.1 | 7155 TOP2B     | K.VVEAVN  | 0.813530126 | 0.98 S1517 | 0.97  |
| IPI00217709.1 | 7155 TOP2B     | K.SEDDSA  | 0.730331964 | 1 S1461    | 0.96  |
| IPI00217709.1 | 7155 TOP2B     | K.KTSFDQ  | 0.401648339 | 0.98 S1576 | 1.06  |
| IPI00217709.1 | 7155 TOP2B     | K.AS*PITN | 0.726073545 | 0.98 S1395 | 1.02  |
| IPI00217709.1 | 7155 TOP2B     | K.ASPITN  | 0.27446972  | 0.98 S1419 | 1.05  |
| IPI00217709.1 | 7155 TOP2B     | K.KVVEAV  | 0.761414517 | 0.81 S1517 | 0.86  |
| IPI00217709.1 | 7155 TOP2B     | K.KT*SFDQ | 0.463105648 | 1 T1570    | 1.06  |
| IPI00217709.1 | 7155 TOP2B     | K.VKAS*PI | 0.604563646 | 1 S1395    | 1.03  |
| IPI00217752.2 | 129563 DIS3L2  | R.GVSAVA  | 0.684201094 | 0.98 S31   | 0.99  |
| IPI00217761.3 | 9610 RIN1      | R.GSPATS  | 0.684201094 | 0.85 S337  | 1.03  |
| IPI00217761.3 | 9610 RIN1      | R.GS*PAT  | 0.072893529 | 0.9 S333   | 1.45  |
| IPI00217761.3 | 9610 RIN1      | R.HT*AAG  | 0           | 0.85 T377  | 25.36 |
| IPI00217773.1 | 26009 ZZZ3     | R.RQTEPV  | 0.947647721 | 0.98 S113  | 1.01  |
| IPI00217874.1 | 283248 RCOR2   | R.VGTNYC  | 0.49616549  | 0.98 S63   | 1.02  |
| IPI00217965.1 | 8841 HDAC3     | R.TDEADA  | 0.756570768 | 0.83 S425  | 0.99  |
| IPI00217965.1 | 8841 HDAC3     | R.GPEENY  | 0.373234869 | 0.98 S425  | 1.16  |
| IPI00217975.3 | 4001 LMNB1     | R.AGGPTT  | 0.32093792  | 0.98 S23   | 1.12  |
| IPI00218017.1 | 407977 TNFSF12 | R.SMPSHF  | 0.03637398  | 0.79 Y292  | 1.37  |
| IPI00218035.1 | 4782 NFIC      | K.KTEMDK  | 0.831562154 | 0.96 S324  | 1.03  |
| IPI00218035.1 | 4782 NFIC      | K.KTEMDK  | 0.831562154 | 0.96 S328  | 1.03  |
| IPI00218035.1 | 4782 NFIC      | R.NWTEDI  | 0.27446972  | 0.94 S314  | 1.14  |
| IPI00218035.1 | 4782 NFIC      | R.LALPPA  | 0.373234869 | 0.81 S464  | 1.01  |
| IPI00218035.1 | 4782 NFIC      | R.LALPPA  | 0.373234869 | 0.81 S464  | 1.01  |
| IPI00218035.1 | 4782 NFIC      | R.LALPPA  | 0.27446972  | 0.92 T463  | 1.05  |
| IPI00218035.1 | 4782 NFIC      | R.LALPPA  | 0.27446972  | 0.92 S464  | 1.05  |
| IPI00218035.1 | 4782 NFIC      | K.SGSMEE  | 0.684201094 | 0.98 S295  | 1.08  |
| IPI00218035.1 | 4782 NFIC      | K.SGSMEE  | 0.684201094 | 0.98 S296  | 1.08  |
| IPI00218035.1 | 4782 NFIC      | K.SPFNSP  | 0.066203153 | 1 S330     | 1.31  |
| IPI00218035.1 | 4782 NFIC      | K.TEMDKS  | 0.373234869 | 1 S324     | 1.11  |
| IPI00218035.1 | 4782 NFIC      | R.NWTEDI  | 0.296993866 | 1 S313     | 1.21  |
| IPI00218052.4 | 23001 WDFY3    | K.ELIS*VS | 3.91E-12    | 0.64 S465  | 2.26  |
| IPI00218055.1 | 93649 MYOCD    | K.FSIPS*P | 0.27446972  | 0.96 S704  | 1.09  |
| IPI00218135.1 | 8535 CBX4      | R.CLSET*H | 7.21E-09    | 0.66 T148  | 1.8   |
| IPI00218386.1 | 864 RUNX3      | R.GSLSTT  | 4.06E-06    | 0.83 S241  | 2.29  |
| IPI00218397.2 | 6305 SBF1      | R.LGLGT*I | 0.27446972  | 0.98 T1147 | 1.11  |
| IPI00218487.2 | 2697 GJA1      | K.GKSDPY  | 0.804577835 | 0.92 S255  | 0.96  |
| IPI00218487.2 | 2697 GJA1      | K.GKSDPY  | 0.804577835 | 0.92 S251  | 0.96  |
| IPI00218487.2 | 2697 GJA1      | K.SDPYHA  | 0.689280356 | 0.81 S255  | 0.59  |
| IPI00218490.3 | 63971 KIF13A   | R.SLS*TPH | 0.656107164 | 0.88 S1384 | 1.2   |
| IPI00218500.4 | 4297 MLL       | R.IRT*PS* | 0.001432711 | 0.53 T2109 | 0.89  |
| IPI00218500.4 | 4297 MLL       | R.RHSTS*  | 0.604563646 | 0.86 S2160 | 0.85  |
| IPI00218500.4 | 4297 MLL       | R.RHS*TS* | 0.604563646 | 0.86 S2158 | 0.85  |
| IPI00218500.4 | 4297 MLL       | K.ALSSAV  | 0.836096036 | 0.98 S3473 | 1.08  |
| IPI00218500.4 | 4297 MLL       | R.NSSTPC  | 0.726073545 | 0.96 T3000 | 0.99  |
| IPI00218500.4 | 4297 MLL       | R.NSSTPC  | 0.756144089 | 0.98 S2998 | 0.99  |
| IPI00218500.4 | 4297 MLL       | R.SDTPEV  | 0.604563646 | 0.98 S518  | 1.1   |
| IPI00218500.4 | 4297 MLL       | R.SDTPEV  | 0.463105648 | 0.98 S516  | 1.1   |
| IPI00218500.4 | 4297 MLL       | R.TIAHS*P | 0.684201094 | 0.98 S2060 | 0.91  |

|               |             |           |             |            |      |
|---------------|-------------|-----------|-------------|------------|------|
| IPI00218507.1 | 3297 HSF1   | R.GHTDTE  | 0.139636808 | 0.94 S363  | 1.2  |
| IPI00218507.1 | 3297 HSF1   | R.VEEASP  | 0.000618432 | 0.79 S319  | 1.14 |
| IPI00218507.1 | 3297 HSF1   | R.GHTDTE  | 0.072926818 | 0.94 S363  | 1.24 |
| IPI00218507.1 | 3297 HSF1   | R.VEEAS*I | 0.431601138 | 0.72 S314  | 0.78 |
| IPI00218507.1 | 3297 HSF1   | R.VKEEPP  | 0.106353987 | 0.96 S303  | 1.2  |
| IPI00218507.1 | 3297 HSF1   | R.GHTDTE  | 0.139636808 | 0.98 S363  | 1.19 |
| IPI00218507.1 | 3297 HSF1   | R.VEEAS*I | 0.021601024 | 0.9 S314   | 1.16 |
| IPI00218507.1 | 3297 HSF1   | R.VEEASP  | 0.026666866 | 0.92 S326  | 1.22 |
| IPI00218567.1 | 6885 MAP3K7 | R.RRSIQD  | 0.116581414 | 0.98 S454  | 1.25 |
| IPI00218567.1 | 6885 MAP3K7 | R.S*IQDLT | 0.044561326 | 0.98 S439  | 1.28 |
| IPI00218680.1 | 26277 TINF2 | K.SKS*PC  | 0           | 0.98 S330  | 6.79 |
| IPI00218680.1 | 26277 TINF2 | R.NLGS*P  | 0.12765804  | 0.94 S295  | 1.3  |
| IPI00218680.1 | 26277 TINF2 | R.NLGSPT  | 0.181528891 | 0.96 T297  | 1.3  |
| IPI00218697.2 | 2035 EPB41  | R.LS*THSF | 0.03637398  | 0.9 S676   | 1.19 |
| IPI00218697.2 | 2035 EPB41  | R.SPRPTS  | 0.139636808 | 0.96 T565  | 1.25 |
| IPI00218697.2 | 2035 EPB41  | R.SPRPTS  | 0.401648339 | 0.94 S560  | 1.05 |
| IPI00218729.3 | 1739 DLG1   | K.TKDS*G  | 0.000233021 | 0.76 S598  | 0.65 |
| IPI00218729.3 | 1739 DLG1   | K.FGDILH  | 0.49616549  | 0.85 S619  | 1.02 |
| IPI00218729.3 | 1739 DLG1   | R.SKPSEP  | 0.938173728 | 1 S102     | 0.96 |
| IPI00218753.1 | 7153 TOP2A  | K.RDPALN  | 0.858851798 | 0.94 S1488 | 0.89 |
| IPI00218753.1 | 7153 TOP2A  | K.RDPALN  | 0.604563646 | 0.98 S1485 | 1.01 |
| IPI00218753.1 | 7153 TOP2A  | K.SVVSDL  | 0.795669231 | 0.92 S1429 | 0.84 |
| IPI00218753.1 | 7153 TOP2A  | K.S*KGES  | 0.017036004 | 0.83 S1527 | 0.93 |
| IPI00218753.1 | 7153 TOP2A  | K.S*VVSDI | 0.530774648 | 0.96 S1410 | 1.12 |
| IPI00218753.1 | 7153 TOP2A  | K.SVVS*DI | 0.530774648 | 0.98 S1413 | 1.04 |
| IPI00218753.1 | 7153 TOP2A  | K.GSVPLS  | 0.604563646 | 0.98 S1429 | 1.02 |
| IPI00218753.1 | 7153 TOP2A  | K.VPDEEE  | 0.566916624 | 0.98 S1142 | 0.96 |
| IPI00218753.1 | 7153 TOP2A  | K.IKNENTE | 0.566916624 | 0.98 S1283 | 0.94 |
| IPI00218753.1 | 7153 TOP2A  | K.KTQMAE  | 0.643675939 | 1 S1249    | 1.02 |
| IPI00218753.1 | 7153 TOP2A  | K.GSVPLS  | 0.84064003  | 0.88 S1428 | 1.03 |
| IPI00218753.1 | 7153 TOP2A  | K.SVVS*DI | 0.684201094 | 1 S1413    | 0.96 |
| IPI00218753.1 | 7153 TOP2A  | K.TQMAE\  | 0.726073545 | 0.98 S1249 | 0.99 |
| IPI00218753.1 | 7153 TOP2A  | K.VPDEEE  | 0.726073545 | 1 T1155    | 0.98 |
| IPI00218753.1 | 7153 TOP2A  | K.GSVPLS  | 0.49616549  | 1 S1428    | 1.03 |
| IPI00218788.1 | 5771 PTPN2  | R.WKELS*  | 0.536956757 | 0.28 S293  | 0.35 |
| IPI00218788.1 | 5771 PTPN2  | K.ELSKED  | 0.000141509 | 0.76 S298  | 1.13 |
| IPI00218788.1 | 5771 PTPN2  | K.ELSKED  | 0.000141509 | 0.76 S304  | 1.13 |
| IPI00218881.1 | 7249 TSC2   | R.VVS*SE  | 0.008098758 | 0.92 S1321 | 1.47 |
| IPI00218881.1 | 7249 TSC2   | R.SLLGLD  | 0.854331471 | 0.94 S1054 | 0.9  |
| IPI00218881.1 | 7249 TSC2   | R.SLLGLD  | 0.166517367 | 0.88 S1053 | 0.97 |
| IPI00218881.1 | 7249 TSC2   | R.VGALDV  | 0.296993866 | 0.94 S1112 | 1.15 |
| IPI00218901.1 | 23043 TNIK  | R.LGSQPIL | 0.096924105 | 0.96 S678  | 1.17 |
| IPI00218909.1 | 2887 GRB10  | K.ALLS*PF | 0.152571688 | 0.9 S372   | 1.13 |
| IPI00218936.1 | 861 RUNX1   | R.FTPPST  | 0.181528891 | 0.96 S21   | 1.09 |
| IPI00218936.1 | 861 RUNX1   | R.RFT*PP  | 0.116581414 | 0.94 T14   | 1.21 |
| IPI00219003.1 | 463 ATBF1   | R.NRLS*FI | 0.233505398 | 0.96 S571  | 1.21 |
| IPI00219003.1 | 463 ATBF1   | K.ASQTPV  | 0.253322457 | 0.09 S2495 | 0.18 |
| IPI00219027.1 | 9203 ZMYM3  | R.SAPTAP  | 0.401648339 | 0.85 T805  | 1.12 |
| IPI00219027.1 | 9203 ZMYM3  | R.GWAPP   | 0.401648339 | 0.94 T62   | 1.14 |
| IPI00219027.1 | 9203 ZMYM3  | R.FYSQQM  | 0.530774648 | 0.69 S772  | 0.82 |
| IPI00219027.1 | 9203 ZMYM3  | R.RAEPK   | 0.296993866 | 0.94 S263  | 1.1  |

|               |             |           |             |           |       |
|---------------|-------------|-----------|-------------|-----------|-------|
| IPI00219027.1 | 9203 ZMYM3  | R.GWAPP   | 0.912548374 | 0.98 S51  | 0.89  |
| IPI00219027.1 | 9203 ZMYM3  | R.GWAPP   | 0.643675939 | 0.96 S51  | 1.03  |
| IPI00219027.1 | 9203 ZMYM3  | R.GWAPP   | 0.643675939 | 0.96 S53  | 1.03  |
| IPI00219027.1 | 9203 ZMYM3  | K.T*GSPG  | 0.643675939 | 1 T462    | 0.92  |
| IPI00219027.1 | 9203 ZMYM3  | K.TGS*PG  | 0.643675939 | 1 S464    | 0.92  |
| IPI00219027.1 | 9203 ZMYM3  | R.RAEPK   | 0.679764929 | 0.79 S263 | 1     |
| IPI00219147.4 | 8531 CSDA   | K.S*PVGS  | 0.530774648 | 0.96 S34  | 1.06  |
| IPI00219147.4 | 8531 CSDA   | R.PAPAVG  | 0.152571688 | 0.88 S255 | 1.1   |
| IPI00219147.4 | 8531 CSDA   | K.SPVGS*  | 0.044561326 | 1 S38     | 1.32  |
| IPI00219301.6 | 4082 MARCKS | K.SFKLS*C | 0.566916624 | 0.86 S167 | 0.85  |
| IPI00219301.6 | 4082 MARCKS | K.LSGFS*F | 0.401648339 | 0.85 S170 | 1.04  |
| IPI00219301.6 | 4082 MARCKS | K.EELQAN  | 0.568296053 | 0.94 S81  | 1.02  |
| IPI00219301.6 | 4082 MARCKS | K.GEAAAE  | 0.401648339 | 1 S27     | 1.11  |
| IPI00219301.6 | 4082 MARCKS | K.GEAAAE  | 0.401648339 | 1 S26     | 1.11  |
| IPI00219301.6 | 4082 MARCKS | K.SFKLS*C | 0.604563646 | 1 S167    | 1     |
| IPI00219301.6 | 4082 MARCKS | K.S*FKLS* | 0.938173728 | 1 S163    | 0.95  |
| IPI00219301.6 | 4082 MARCKS | K.EAPAEC  | 0.401648339 | 0.98 T120 | 1.03  |
| IPI00219301.6 | 4082 MARCKS | K.LSGFS*F | 0.214968943 | 1 S170    | 1.16  |
| IPI00219314.5 | 9919 SEC16A | R.LLPSAP  | 1.24E-07    | 0.9 S1786 | 1.9   |
| IPI00219314.5 | 9919 SEC16A | R.IVNHWA  | 0.684201094 | 0.98 S136 | 1.12  |
| IPI00219314.5 | 9919 SEC16A | R.LS*GSAI | 0.197661257 | 0.92 S356 | 1.11  |
| IPI00219356.1 | 6926 TBX3   | R.LDKAS*F | 0.373234869 | 0.98 S432 | 0.99  |
| IPI00219356.1 | 6926 TBX3   | R.LDKAS*F | 0.373234869 | 0.98 S432 | 0.99  |
| IPI00219356.1 | 6926 TBX3   | R.LDKAS*F | 0.214968943 | 1 S432    | 1.15  |
| IPI00219356.1 | 6926 TBX3   | K.ASPDSR  | 0.166517367 | 0.98 T446 | 1.19  |
| IPI00219356.1 | 6926 TBX3   | K.ASPDSR  | 0.166517367 | 0.98 T441 | 1.19  |
| IPI00219356.1 | 6926 TBX3   | K.ASPDSR  | 0.166517367 | 0.98 S443 | 1.19  |
| IPI00219415.3 | 9913 SUPT7L | R.FPSNLE  | 0.976229102 | 0.88 S332 | 0.85  |
| IPI00219415.3 | 9913 SUPT7L | R.FPSNLE  | 0.845194016 | 0.81 S321 | 0.86  |
| IPI00219509.1 | 8491 MAP4K3 | K.TRS*EIT | 0.643675939 | 0.98 S319 | 1.06  |
| IPI00219556.2 | 7799 PRDM2  | K.RKPS*Q  | 0.743182508 | 0.85 S421 | 0.87  |
| IPI00219556.2 | 7799 PRDM2  | R.TSS*PP  | 0.530774648 | 0.88 S739 | 0.97  |
| IPI00219556.2 | 7799 PRDM2  | K.RKPSQT  | 0.643675939 | 1 S427    | 0.96  |
| IPI00219556.2 | 7799 PRDM2  | K.RKPSQT  | 0.643675939 | 1 T423    | 0.96  |
| IPI00219592.2 | 5568 PRKACG | K.GRTWTL  | 0.49616549  | 0.83 T211 | 0.89  |
| IPI00219592.2 | 5568 PRKACG | K.GRT*WT  | 0.463105648 | 0.83 T205 | 0.89  |
| IPI00219592.2 | 5568 PRKACG | R.TWT*LC  | 0.401648339 | 0.9 T207  | 1     |
| IPI00219592.2 | 5568 PRKACG | K.GRTWT*  | 0.566916624 | 0.98 T207 | 1.11  |
| IPI00219592.2 | 5568 PRKACG | R.T*WTLC  | 0.401648339 | 1 T205    | 1.14  |
| IPI00219601.1 | 5598 MAPK7  | R.GLCTSP  | 0.096924105 | 0.92 Y221 | 1.47  |
| IPI00219602.1 | 11234 HPS5  | K.STRPAP  | 0.139636808 | 0.79 S938 | 0.84  |
| IPI00219602.1 | 11234 HPS5  | K.IGTLHT  | 0.604563646 | 1 S449    | 0.99  |
| IPI00219708.1 | 3953 LEPR   | K.KY*YIHC | 0           | 0.92 Y795 | 31.31 |
| IPI00219754.1 | 8500 PPFIA1 | K.GALHT*  | 0.011294655 | 0.86 T761 | 1.13  |
| IPI00219754.1 | 8500 PPFIA1 | K.GALHTV  | 0.214968943 | 0.98 S763 | 1.15  |
| IPI00219764.3 | 24140 FTSJ1 | K.YTPPTQ  | 0.373234869 | 0.98 S269 | 1.06  |
| IPI00219799.2 | 9448 MAP4K4 | R.RDS*PL  | 0.795669231 | 0.94 S608 | 1.01  |
| IPI00219799.2 | 9448 MAP4K4 | R.KGS*VV  | 0.054409842 | 0.96 S873 | 1.15  |
| IPI00219799.2 | 9448 MAP4K4 | R.TTTRS*F | 0.49616549  | 0.96 S600 | 1.08  |
| IPI00219799.2 | 9448 MAP4K4 | R.RNT*FIG | 0.530774648 | 0.74 T187 | 0.68  |
| IPI00219799.2 | 9448 MAP4K4 | K.LVDFGV  | 0.643675939 | 0.53 T181 | 0.78  |

|               |               |           |             |            |      |
|---------------|---------------|-----------|-------------|------------|------|
| IPI00219799.2 | 9448 MAP4K4   | R.RNTFIG' | 0.834430989 | 0.88 T191  | 1.14 |
| IPI00219805.1 | 6276 S100A5   | K.ALTTMV  | 0           | 0.58 T33   | 33.5 |
| IPI00219841.6 | 3978 LIG1     | K.EWNGV'  | 0.116581414 | 0.98 S51   | 1.16 |
| IPI00219841.6 | 3978 LIG1     | K.EWNGV'  | 0.116581414 | 0.98 S49   | 1.16 |
| IPI00219841.6 | 3978 LIG1     | K.GQKPAL  | 0.214968943 | 0.98 S91   | 1.16 |
| IPI00220079.1 | 8202 NCOA3    | K.TPHDILE | 0.346340474 | 0.85 S214  | 1.22 |
| IPI00220108.1 | 546 ATRX      | R.NS*SDS  | 0.985805237 | 0.96 S586  | 0.87 |
| IPI00220108.1 | 546 ATRX      | R.EVIEIED | 0.877341226 | 0.9 S1410  | 0.95 |
| IPI00220119.4 | 56916 SMARCAD | R.KAS*ISY | 0.604563646 | 0.96 S79   | 0.99 |
| IPI00220119.4 | 56916 SMARCAD | R.RNDDIS  | 0.12765804  | 0.9 S146   | 0.97 |
| IPI00220119.4 | 56916 SMARCAD | R.RNDDIS  | 0.071580795 | 0.77 S152  | 1    |
| IPI00220158.1 | 118 ADD1      | R.S*PGSP  | 0.467835816 | 0.85 S355  | 0.58 |
| IPI00220158.1 | 118 ADD1      | R.SPGS*P  | 0.467835816 | 0.85 S358  | 0.58 |
| IPI00220158.1 | 118 ADD1      | K.KYSDVE  | 0.346340474 | 0.77 S436  | 0.93 |
| IPI00220158.1 | 118 ADD1      | K.KYSDVE  | 0.346340474 | 0.77 S427  | 0.93 |
| IPI00220158.1 | 118 ADD1      | K.EDGHR1  | 0.088241621 | 0.66 T513  | 0.63 |
| IPI00220158.1 | 118 ADD1      | K.YSDVEV  | 0.8197889   | 0.92 S436  | 0.88 |
| IPI00220158.1 | 118 ADD1      | R.S*PGSP  | 0.643675939 | 0.92 S355  | 1.19 |
| IPI00220158.1 | 118 ADD1      | R.TPS*FLK | 0.253322457 | 1 S757     | 1.15 |
| IPI00220158.1 | 118 ADD1      | R.AAVVTS  | 0.463105648 | 1 S12      | 1.05 |
| IPI00220219.5 | 9276 COPB2    | R.STAQQE  | 0.233505398 | 0.85 T861  | 1.02 |
| IPI00220219.5 | 9276 COPB2    | R.STAQQE  | 0.853966795 | 0.94 S859  | 1.22 |
| IPI00220219.5 | 9276 COPB2    | R.STAQQE  | 0.853966795 | 0.94 T861  | 1.22 |
| IPI00220219.5 | 9276 COPB2    | R.STAQQE  | 0.152571688 | 0.98 S859  | 1.12 |
| IPI00220219.5 | 9276 COPB2    | R.ST*AAQ  | 0.152571688 | 0.98 T848  | 1.12 |
| IPI00220243.1 | 11135 CDC42EP | R.RSDSLL  | 0.32093792  | 0.94 S195  | 1.11 |
| IPI00220243.1 | 11135 CDC42EP | R.RSDS*LI | 0.346340474 | 0.98 S192  | 1.07 |
| IPI00220308.1 | 4771 NF2      | R.MSFSS*  | 0.463105648 | 0.98 S13   | 1.19 |
| IPI00220318.1 | 2005 ELK4     | K.LAEKKS  | 0.566916624 | 0.96 T185  | 1.01 |
| IPI00220318.1 | 2005 ELK4     | K.LAEKKS  | 0.566916624 | 0.96 S180  | 1.01 |
| IPI00220318.1 | 2005 ELK4     | K.KPPVEP  | 1.37E-13    | 0.64 S215  | 0.71 |
| IPI00220381.2 | 6942 TCF20    | R.RSVICD  | 0.346340474 | 0.92 S871  | 1.14 |
| IPI00220381.2 | 6942 TCF20    | R.GRS*PS  | 0.566916624 | 0.94 S1005 | 1.02 |
| IPI00220381.2 | 6942 TCF20    | R.GNAS*P  | 0.373234869 | 0.98 S966  | 1.1  |
| IPI00220409.2 | 5564 PRKAB1   | R.S*HNNF  | 0.139636808 | 0.92 S108  | 1.07 |
| IPI00220409.2 | 5564 PRKAB1   | K.CSDVSE  | 0.080258071 | 0.96 Y187  | 1.19 |
| IPI00220409.2 | 5564 PRKAB1   | K.CSDVSE  | 0.139636808 | 0.98 S181  | 1.15 |
| IPI00220409.2 | 5564 PRKAB1   | K.CSDVSE  | 0.139636808 | 0.96 S182  | 1.16 |
| IPI00220426.1 | 3607 FOXK2    | R.S*APAS' | 0.99978897  | 0.94 S369  | 0.94 |
| IPI00220426.1 | 3607 FOXK2    | R.SAPAS*I | 0.094770849 | 0.98 S373  | 0.77 |
| IPI00220426.1 | 3607 FOXK2    | R.EGS*PA  | 0.103012816 | 0.94 S398  | 0.78 |
| IPI00220426.1 | 3607 FOXK2    | R.FAQSAF  | 0.387188711 | 1 S428     | 0.81 |
| IPI00220465.1 | 51474 LIMA1   | K.SLNWSE  | 0.912548374 | 0.96 T554  | 0.93 |
| IPI00220465.1 | 51474 LIMA1   | R.KISENS' | 0.132773239 | 0.69 Y69   | 0.79 |
| IPI00220465.1 | 51474 LIMA1   | K.SEVQQF  | 0.463105648 | 1 S202     | 1.05 |
| IPI00220465.1 | 51474 LIMA1   | R.KISENS' | 0.795419436 | 0.94 S68   | 0.83 |
| IPI00220465.1 | 51474 LIMA1   | R.KIS*ENS | 0.84419767  | 0.94 S65   | 0.83 |
| IPI00220465.1 | 51474 LIMA1   | K.SLNWSE  | 0.946608772 | 0.86 S549  | 0.7  |
| IPI00220465.1 | 51474 LIMA1   | K.EGHSLE  | 0.280412571 | 0.77 S526  | 0.75 |
| IPI00220465.1 | 51474 LIMA1   | R.KIS*ENS | 0.656107164 | 0.81 S65   | 0.69 |
| IPI00220465.1 | 51474 LIMA1   | R.KISENS' | 0.703604632 | 0.11 S68   | 0.1  |

|               |              |           |             |      |      |      |
|---------------|--------------|-----------|-------------|------|------|------|
| IPI00220465.1 | 51474 LIMA1  | R.KISENS` | 0.698823319 | 0.81 | S70  | 0.88 |
| IPI00220465.1 | 51474 LIMA1  | R.ETPHS*I | 0.881970624 | 1    | S330 | 0.96 |
| IPI00220505.1 | 4140 MARK3   | R.TPVAST  | 0.139636808 | 1    | S569 | 1.29 |
| IPI00220505.1 | 4140 MARK3   | R.TPVAST  | 0.139636808 | 1    | S566 | 1.29 |
| IPI00220505.1 | 4140 MARK3   | R.TPVAS** | 0.933447376 | 0.92 | S563 | 1.24 |
| IPI00220505.1 | 4140 MARK3   | R.TPVAST  | 0.643675939 | 1    | T572 | 1.09 |
| IPI00220505.1 | 4140 MARK3   | R.SRGS*T  | 0.214968943 | 1    | S624 | 1.23 |
| IPI00220505.1 | 4140 MARK3   | R.LLKT*IG | 0.181528891 | 1    | T61  | 1.19 |
| IPI00220505.1 | 4140 MARK3   | K.LDT*FCC | 0.604563646 | 0.98 | T234 | 1.13 |
| IPI00220558.2 | 6261 RYR1    | R.INGCPV  | 0.566916624 | 0.92 | S781 | 0.7  |
| IPI00220587.1 | 274 BIN1     | K.GNKS*P  | 0.684201094 | 0.96 | S280 | 1.13 |
| IPI00220587.1 | 274 BIN1     | R.VNHEPE  | 0.643675939 | 0.94 | T307 | 1    |
| IPI00220587.1 | 274 BIN1     | R.VNHEPE  | 0.49616549  | 0.9  | T307 | 0.94 |
| IPI00220593.1 | 6453 ITSN1   | R.SAFTPA  | 0.684201094 | 0.79 | S899 | 0.8  |
| IPI00220716.2 | 64783 RBM15  | R.TTAPTE  | 0.431601138 | 0.96 | S741 | 1.08 |
| IPI00220716.2 | 64783 RBM15  | R.HCAPS*  | 0.684201094 | 0.98 | S670 | 1.02 |
| IPI00220716.2 | 64783 RBM15  | K.DKENTG  | 0.463105648 | 0.9  | S935 | 0.82 |
| IPI00220716.2 | 64783 RBM15  | R.LHSYS*G | 0.49616549  | 0.96 | S127 | 1.03 |
| IPI00220716.2 | 64783 RBM15  | R.HCAPSF  | 0.84064003  | 0.94 | S680 | 1.15 |
| IPI00220716.2 | 64783 RBM15  | R.HCAPSF  | 0.684201094 | 0.96 | S679 | 1.11 |
| IPI00220716.2 | 64783 RBM15  | R.HCAPSF  | 0.296993866 | 0.96 | S674 | 1.11 |
| IPI00220716.2 | 64783 RBM15  | R.S*LSPG  | 0.530774648 | 1    | S292 | 1.04 |
| IPI00220716.2 | 64783 RBM15  | R.TTAPTE  | 0.346340474 | 1    | S741 | 1.09 |
| IPI00220716.2 | 64783 RBM15  | R.HCAPS*  | 0.27446972  | 1    | S670 | 1.13 |
| IPI00220716.2 | 64783 RBM15  | R.TTAPTE  | 0.32093792  | 1    | S741 | 1.07 |
| IPI00220716.2 | 64783 RBM15  | R.SLS*PG  | 0.401648339 | 1    | S294 | 1.05 |
| IPI00220716.2 | 64783 RBM15  | R.HCAPS*  | 0.32093792  | 1    | S670 | 1.11 |
| IPI00220716.2 | 64783 RBM15  | R.DRT*PP  | 0.27446972  | 1    | T568 | 1.11 |
| IPI00220754.1 | 120 ADD3     | R.WLNS*P  | 0.98101429  | 0.96 | S442 | 0.95 |
| IPI00220754.1 | 120 ADD3     | R.HKS*DV  | 0.373234869 | 0.58 | S402 | 0.96 |
| IPI00220754.1 | 120 ADD3     | R.HKSDVE  | 0.009053635 | 0.81 | T409 | 0.98 |
| IPI00220754.1 | 120 ADD3     | R.HKSDVE  | 0.116581414 | 0.98 | S423 | 1.03 |
| IPI00220754.1 | 120 ADD3     | R.TPS*FL  | 0.253322457 | 1    | S661 | 1.15 |
| IPI00220795.3 | 10919 EHMT2  | R.GDGVTF  | 0.401648339 | 0.9  | T526 | 1.03 |
| IPI00220795.3 | 10919 EHMT2  | K.S*PPSV  | 0.49616549  | 0.92 | S140 | 1.09 |
| IPI00220795.3 | 10919 EHMT2  | R.KLNS*G  | 0.023896338 | 0.64 | S232 | 0.51 |
| IPI00220833.1 | 7343 UBTF    | R.GKLPE   | 0.373234869 | 0.79 | S447 | 1.04 |
| IPI00220833.1 | 7343 UBTF    | K.RPVS*AI | 0.088241621 | 0.94 | S375 | 1.18 |
| IPI00220835.6 | 10952 SEC61B | -.PGPTPS  | 0.566916624 | 1    | S13  | 1.06 |
| IPI00220859.2 | 831 CAST     | K.SLT*PA  | 0.072926818 | 0.96 | T113 | 1.28 |
| IPI00220859.2 | 831 CAST     | K.S*LTPA  | 0.072926818 | 0.96 | S92  | 1.28 |
| IPI00220859.2 | 831 CAST     | K.EGITGP  | 0.060044376 | 0.66 | S221 | 1.01 |
| IPI00220859.2 | 831 CAST     | K.KEGITG  | 0.002296625 | 0.61 | T223 | 0.72 |
| IPI00220866.1 | 4665 NAB2    | K.LS*PLP  | 0.463105648 | 0.96 | S171 | 0.98 |
| IPI00220866.1 | 4665 NAB2    | R.SFSPKS  | 0.800289022 | 0.9  | S162 | 1.14 |
| IPI00220901.3 | 9882 TBC1D4  | R.HAS*AP  | 0.253322457 | 0.96 | S341 | 1.09 |
| IPI00220901.3 | 9882 TBC1D4  | R.AHT*FS  | 0.197661257 | 0.85 | T642 | 0.98 |
| IPI00220901.3 | 9882 TBC1D4  | R.HASAPS  | 0.296993866 | 0.98 | S344 | 1.19 |
| IPI00220901.3 | 9882 TBC1D4  | R.LGS*VD  | 0.139636808 | 0.98 | S588 | 1.18 |
| IPI00220901.3 | 9882 TBC1D4  | R.SLTSS*L | 0.530774648 | 0.88 | S570 | 1.18 |
| IPI00220901.3 | 9882 TBC1D4  | R.GPDPG   | 0.431601138 | 0.88 | S262 | 0.94 |

|               |                |           |             |            |      |
|---------------|----------------|-----------|-------------|------------|------|
| IPI00220918.1 | 1786 DNMT1     | K.NRIS*W  | 0.004600913 | 0.94 S748  | 1.09 |
| IPI00220918.1 | 1786 DNMT1     | R.VGMAD/  | 0.296993866 | 1 S127     | 1.08 |
| IPI00220918.1 | 1786 DNMT1     | K.EADDDE  | 0.566916624 | 0.9 S730   | 0.96 |
| IPI00221012.6 | 8239 USP9X     | R.RPYTGM  | 0.566916624 | 0.55 S2443 | 0.6  |
| IPI00221012.6 | 8239 USP9X     | R.RPYTGM  | 0.253322457 | 0.72 Y2439 | 1.16 |
| IPI00221073.1 | 4784 NFIX      | R.SPAAGS  | 0.116581414 | 0.94 S298  | 1.15 |
| IPI00221073.1 | 4784 NFIX      | R.SITS*PP | 0.849757871 | 0.96 S260  | 1.02 |
| IPI00221073.1 | 4784 NFIX      | R.VSQTPV  | 0.530774648 | 0.77 S250  | 0.9  |
| IPI00221073.1 | 4784 NFIX      | R.S*PAAG  | 0.49616549  | 0.98 S293  | 1.08 |
| IPI00221171.4 | 25 ABL1        | K.KNEEAA  | 0.011294655 | 0.71 S824  | 1.18 |
| IPI00221285.5 | 57182 ANKRD50  | R.TTSSTA  | 0.480507638 | 0.94 T1215 | 0.87 |
| IPI00221285.5 | 57182 ANKRD50  | R.TTSSTA  | 0.627992512 | 0.85 S1213 | 1.02 |
| IPI00221285.5 | 57182 ANKRD50  | R.TTSSTA  | 0.604563646 | 0.96 S1222 | 1.02 |
| IPI00221306.2 | 4170 MCL1      | K.RPAVLP  | 0.463105648 | 0.88 T163  | 1.03 |
| IPI00221306.2 | 4170 MCL1      | K.RPAVLP  | 0.751811379 | 0.72 S150  | 1.03 |
| IPI00221306.2 | 4170 MCL1      | K.RPAVLP  | 0.530774648 | 0.98 T154  | 1.03 |
| IPI00221325.3 | 5903 RANBP2    | K.S*GSSF  | 0.751811379 | 0.94 S1447 | 1.12 |
| IPI00221325.3 | 5903 RANBP2    | K.DSLITP  | 0.829549043 | 0.88 S2454 | 0.99 |
| IPI00221325.3 | 5903 RANBP2    | K.SGSSFV  | 0.932027377 | 0.98 S1456 | 0.92 |
| IPI00221325.3 | 5903 RANBP2    | R.EDALDC  | 0.853966795 | 0.96 S2251 | 0.86 |
| IPI00221325.3 | 5903 RANBP2    | K.NHETDC  | 0.463105648 | 0.88 S1160 | 1.01 |
| IPI00221325.3 | 5903 RANBP2    | R.LLLDIPL | 0.113558743 | 0.96 T2153 | 0.89 |
| IPI00221325.3 | 5903 RANBP2    | K.NHETDC  | 0.604563646 | 0.88 S1160 | 0.9  |
| IPI00221325.3 | 5903 RANBP2    | K.AVVS*PI | 0.831562154 | 1 S2510    | 0.98 |
| IPI00221325.3 | 5903 RANBP2    | K.VGEDEL  | 0.346340474 | 0.96 S2900 | 0.95 |
| IPI00221394.7 | 1736 DKC1      | R.KRES*E  | 0.777986561 | 0.62 S451  | 0.78 |
| IPI00221394.7 | 1736 DKC1      | R.KRES*E  | 0.401648339 | 1 S451     | 1.12 |
| IPI00221394.7 | 1736 DKC1      | R.KS*LPEE | 0.834430989 | 0.96 S21   | 0.95 |
| IPI00233796.2 | 114876 OSBPL1A | R.SLS*RL  | 0.985805237 | 0.66 S490  | 1.05 |
| IPI00236575.1 | 50618 ITS2     | R.TVSPGS  | 0.214968943 | 0.92 S886  | 0.86 |
| IPI00236575.1 | 50618 ITS2     | R.T*VSPG  | 0.139636808 | 0.92 T881  | 0.86 |
| IPI00236575.1 | 50618 ITS2     | R.TVS*PG  | 0.401648339 | 0.94 S883  | 1.02 |
| IPI00236575.1 | 50618 ITS2     | R.TVSPGS  | 0.296993866 | 1 S888     | 1.02 |
| IPI00237884.2 | 9590 AKAP12    | R.EGVTPV  | 0.27446972  | 0.98 S612  | 1.17 |
| IPI00241886.2 | 23109 DDN      | R.DAPTQF  | 0.214968943 | 0.92 S567  | 1.18 |
| IPI00243221.2 | 4898 NRD1      | R.RGS*LS  | 0.116581414 | 0.98 S94   | 1.25 |
| IPI00247295.3 | 23345 SYNE1    | R.GAVALS  | 0           | 0.52 S8261 | 0.15 |
| IPI00247439.3 | 9748 SLK       | R.RDSFIG  | 0.214968943 | 0.98 T193  | 1.17 |
| IPI00247439.3 | 9748 SLK       | R.RDS*FIG | 0.214968943 | 0.98 S189  | 1.17 |
| IPI00251559.8 | 56254 RNF20    | R.SGSALL  | 0.296993866 | 0.96 S527  | 1.33 |
| IPI00251559.8 | 56254 RNF20    | R.SGSALL  | 0.296993866 | 0.96 S526  | 1.33 |
| IPI00251559.8 | 56254 RNF20    | K.ALVVPE  | 0.684201094 | 0.85 S138  | 1.07 |
| IPI00253281.7 | 54869 EPS8L1   | R.DRS*PA  | 0.004102604 | 0.96 S55   | 1.46 |
| IPI00253323.3 | 65124 ANKRD57  | R.DLVMGS  | 0.8197889   | 0.94 S212  | 0.98 |
| IPI00254471.5 | 55734 ZFP64    | R.IHS*DEF | 0.519333664 | 0.81 S172  | 0.98 |
| IPI00255778.6 |                | R.QLPALD  | 0.530774648 | 0.86 S516  | 0.95 |
| IPI00257508.4 | 1808 DPYSL2    | R.GLYDGF  | 0.024009318 | 0.85 T509  | 1.09 |
| IPI00257731.1 | 7991 TUSC3     | R.IICLVGL | 0.001001611 | 0.59 S327  | 1.08 |
| IPI00259958.3 |                | K.AMMISIC | 0.03637398  | 0.86 S186  | 1.22 |
| IPI00260388.3 | 5253 PHF2      | K.SRES*A  | 0.905247537 | 0.86 S537  | 0.88 |
| IPI00260388.3 | 5253 PHF2      | K.FSFSFS  | 0.530774648 | 0.96 S640  | 1.02 |

|               |               |            |             |            |      |
|---------------|---------------|------------|-------------|------------|------|
| IPI00260388.3 | 5253 PHF2     | R.ESAS*P'  | 0.985337202 | 0.88 S539  | 0.93 |
| IPI00260388.3 | 5253 PHF2     | K.DSDYVY   | 0.684201094 | 0.96 S882  | 0.96 |
| IPI00288889.3 | 5616 PRKY     | R.T*WTLC   | 0.300293467 | 0.96 T201  | 0.77 |
| IPI00288941.1 | 57727 NCOA5   | R.LMRSS*   | 0.623338592 | 0.94 S378  | 0.94 |
| IPI00288941.1 | 57727 NCOA5   | R.S*STDSI  | 0.139636808 | 0.94 S377  | 1.14 |
| IPI00288941.1 | 57727 NCOA5   | R.SST*DSI  | 0.139636808 | 0.94 T379  | 1.14 |
| IPI00289034.2 | 84444 DOT1L   | K.S*PPKTL  | 0.726073545 | 0.86 S1213 | 1.01 |
| IPI00289034.2 | 84444 DOT1L   | K.IATISLE' | 0.938173728 | 0.94 S1213 | 0.98 |
| IPI00289034.2 | 84444 DOT1L   | K.GPEAAC   | 0.040276449 | 0.92 S1349 | 1.15 |
| IPI00289034.2 | 84444 DOT1L   | K.KNQ TAL  | 0.296993866 | 0.96 S448  | 0.98 |
| IPI00289034.2 | 84444 DOT1L   | K.LSGLAA   | 0.181528891 | 1 S775     | 1.12 |
| IPI00289082.2 | 5782 PTPN12   | R.TPESFV   | 0.001613065 | 0.94 T693  | 1.16 |
| IPI00289082.2 | 5782 PTPN12   | R.TPESFV   | 0.001613065 | 0.94 S689  | 1.16 |
| IPI00289082.2 | 5782 PTPN12   | K.IADGVN   | 0.049260986 | 0.85 S332  | 0.98 |
| IPI00289082.2 | 5782 PTPN12   | R.KTVSLT   | 0.181528891 | 1 S588     | 1.12 |
| IPI00289357.4 | 8408 ULK1     | R.NPLPPIL  | 0.006469654 | 0.67 S623  | 1.29 |
| IPI00289357.4 | 8408 ULK1     | K.TPS*SQI  | 0.296927077 | 0.76 S638  | 0.91 |
| IPI00289432.3 | 148398 SAMD11 | R.ELGTGE   | 0.530774648 | 0.98 S673  | 1.08 |
| IPI00289491.3 | 22794 CASC3   | R.RLEQTS   | 0.116581414 | 0.96 S363  | 1.11 |
| IPI00289491.3 | 22794 CASC3   | R.RLEQTS   | 0.253322457 | 0.85 S358  | 1.12 |
| IPI00289491.3 | 22794 CASC3   | R.RLEQTS   | 0.253322457 | 0.85 S363  | 1.12 |
| IPI00289547.3 | 3727 JUND     | R.LAALKD   | 0.703604632 | 0.58 S255  | 0.82 |
| IPI00289547.3 | 3727 JUND     | R.LAALKD   | 0.021601024 | 0.83 S255  | 1.12 |
| IPI00289547.3 | 3727 JUND     | R.LAALKD   | 0.023342673 | 0.88 S259  | 0.6  |
| IPI00289608.3 | 8943 AP3D1    | K.KAEDLD   | 0.32093792  | 0.88 T787  | 1.12 |
| IPI00289776.2 | 23077 MYCBP2  | R.HEDEQ/   | 0.756144089 | 0.96 S2652 | 0.99 |
| IPI00289776.2 | 23077 MYCBP2  | R.HEDEQ/   | 0.756144089 | 0.96 T2645 | 0.99 |
| IPI00289776.2 | 23077 MYCBP2  | R.SLS*PNI  | 0.961160996 | 1 S2751    | 0.95 |
| IPI00289776.2 | 23077 MYCBP2  | R.RVNS*G   | 0.233505398 | 0.59 S3468 | 0.7  |
| IPI00289776.2 | 23077 MYCBP2  | R.HEDEQ/   | 0.684201094 | 0.9 T2645  | 1.08 |
| IPI00289776.2 | 23077 MYCBP2  | R.VNS*GD   | 0.643675939 | 0.94 S3468 | 1.01 |
| IPI00289776.2 | 23077 MYCBP2  | R.S*LSPNI  | 0.932027377 | 1 S2749    | 0.91 |
| IPI00289776.2 | 23077 MYCBP2  | R.SKS*DS'  | 0.9240167   | 0.92 S2833 | 0.84 |
| IPI00289819.4 | 3482 IGF2R    | K.LVSFHD   | 0.726073545 | 1 S2484    | 1    |
| IPI00289849.6 | 114794 LRRC62 | K.YIEKGS'  | 0.006469654 | 0.94 S668  | 1.57 |
| IPI00289870.3 | 5099 PCDH7    | K.SSSPLP   | 0.373234869 | 0.94 S964  | 0.9  |
| IPI00289870.3 | 5099 PCDH7    | K.TGEYKP   | 0.888156101 | 0.98 S1188 | 0.96 |
| IPI00289870.3 | 5099 PCDH7    | K.SSS*PLF  | 0.530774648 | 0.96 S1000 | 0.93 |
| IPI00289870.3 | 5099 PCDH7    | K.S*SSPLF  | 0.37570848  | 0.96 S951  | 0.82 |
| IPI00290094.3 | 6433 SFRS8    | K.SGVSS*   | 0.566916624 | 0.96 S283  | 1.14 |
| IPI00290142.5 | 1503 CTPS     | R.DTYSDF   | 0.152571688 | 0.59 S571  | 1.48 |
| IPI00290142.5 | 1503 CTPS     | R.DTYSDF   | 0.152571688 | 0.59 S574  | 1.48 |
| IPI00290142.5 | 1503 CTPS     | R.SGSSS*   | 0.489032481 | 0.88 S575  | 0.92 |
| IPI00290142.5 | 1503 CTPS     | R.SGSS*S   | 0.489032481 | 0.88 S574  | 0.92 |
| IPI00290184.2 | 4234 METTL1   | R.AHS*NP   | 0.877341226 | 0.86 S27   | 0.94 |
| IPI00290204.1 | 6625 SNRP70   | R.EFEVY*(  | 0.026666866 | 0.94 Y126  | 1.24 |
| IPI00290204.1 | 6625 SNRP70   | R.DDTS*R   | 0.106353987 | 0.94 S217  | 1.36 |
| IPI00290272.2 | 23649 POLA2   | R.S*PHQL   | 0.029596689 | 0.96 S141  | 1.26 |
| IPI00290272.2 | 23649 POLA2   | R.SPHQLL   | 0.011294655 | 0.96 S147  | 1.38 |
| IPI00290272.2 | 23649 POLA2   | R.S*PHQL   | 0.012603917 | 1 S141     | 1.4  |
| IPI00290314.7 | 56897 WRNIP1  | K.RPAAAA   | 0.01942062  | 0.98 S153  | 1.39 |



|               |        |         |           |             |      |       |      |
|---------------|--------|---------|-----------|-------------|------|-------|------|
| IPI00290314.7 | 56897  | WRNIP1  | R.RLS*ES  | 0.080258071 | 0.98 | S75   | 1.24 |
| IPI00290337.7 | 2059   | EPS8    | R.APAPAP  | 0.510604444 | 0.96 | T223  | 0.86 |
| IPI00290337.7 | 2059   | EPS8    | R.KGPGE   | 0.32093792  | 1    | T317  | 1.09 |
| IPI00290337.7 | 2059   | EPS8    | R.RKS*QM  | 0.99978897  | 0.76 | S685  | 0.44 |
| IPI00290410.3 | 30836  | DNTTIP2 | K.VT*PTKE | 0.32093792  | 0.96 | T129  | 1.22 |
| IPI00290410.3 | 30836  | DNTTIP2 | K.VTPTKE  | 0.422621578 | 0.83 | T136  | 0.91 |
| IPI00290410.3 | 30836  | DNTTIP2 | K.VTPTKE  | 0.214968943 | 0.98 | Y135  | 1.16 |
| IPI00290410.3 | 30836  | DNTTIP2 | K.VT*PTKE | 0.214968943 | 0.98 | T129  | 1.16 |
| IPI00290410.3 | 30836  | DNTTIP2 | K.VTPT*KE | 0.936890791 | 0.98 | T131  | 1.01 |
| IPI00290410.3 | 30836  | DNTTIP2 | K.ESYTEE  | 0.40669332  | 0.01 | S141  | 0.03 |
| IPI00290460.3 | 8666   | EIF3S4  | K.GIPLATC | 0.27446972  | 0.28 | T41   | 0.54 |
| IPI00290460.3 | 8666   | EIF3S4  | K.GIPLATC | 0.296993866 | 0.98 | S42   | 1.12 |
| IPI00290562.4 | 4783   | NFIL3   | K.GPIHS*F | 0.961160996 | 0.98 | S301  | 0.97 |
| IPI00290562.4 | 4783   | NFIL3   | R.GSYTAS  | 0.656107164 | 0.94 | S258  | 0.93 |
| IPI00290562.4 | 4783   | NFIL3   | K.LSS*PID | 0.604563646 | 0.96 | S353  | 1.04 |
| IPI00290837.1 | 10517  | FBXW10  | R.DLSS*G  | 0.072926818 | 0.64 | S269  | 1.09 |
| IPI00290952.6 | 23076  | RRP1B   | K.KTDKS*I | 0.136867371 | 0.71 | S702  | 0.83 |
| IPI00290952.6 | 23076  | RRP1B   | R.GS*PTG  | 0.809048575 | 0.96 | S513  | 0.93 |
| IPI00290952.6 | 23076  | RRP1B   | K.SILVS*P | 0.604820989 | 0.85 | S706  | 1.12 |
| IPI00290952.6 | 23076  | RRP1B   | K.TPTSSP  | 0.510604444 | 0.98 | S736  | 0.72 |
| IPI00290952.6 | 23076  | RRP1B   | K.TPTSS*F | 0.431601138 | 0.94 | S732  | 1.15 |
| IPI00290952.6 | 23076  | RRP1B   | K.TPTSS*F | 0.49616549  | 0.96 | S732  | 1.12 |
| IPI00290952.6 | 23076  | RRP1B   | K.VGDGDI  | 0.12765804  | 0.98 | S245  | 1.19 |
| IPI00290952.6 | 23076  | RRP1B   | R.GS*PTG  | 0.726073545 | 1    | S513  | 1.03 |
| IPI00291003.5 | 115752 | DIS3L   | K.IPNTELI | 0.684201094 | 0.96 | S906  | 1.01 |
| IPI00291016.7 | 4731   | NDUFV3  | R.KVAS*P  | 0.463105648 | 0.92 | S98   | 0.94 |
| IPI00291032.6 | 92521  | SPECC1  | K.ASL*PI  | 0.726073545 | 0.96 | S325  | 0.91 |
| IPI00291032.6 | 92521  | SPECC1  | K.ASLSPD  | 0.296993866 | 0.88 | S340  | 0.94 |
| IPI00291032.6 | 92521  | SPECC1  | K.ASLSPD  | 0.296993866 | 0.88 | S344  | 0.94 |
| IPI00291032.6 | 92521  | SPECC1  | K.ASLSPD  | 0.296993866 | 0.88 | S347  | 0.94 |
| IPI00291205.4 | 5139   | PDE3A   | R.RTS*LPC | 0.346340474 | 0.92 | S312  | 1.13 |
| IPI00291205.4 | 5139   | PDE3A   | R.RVSST*) | 0.726073545 | 0.98 | T440  | 1.05 |
| IPI00291205.4 | 5139   | PDE3A   | K.SRSFTS  | 0.928728317 | 0.72 | Y497  | 1.09 |
| IPI00291205.4 | 5139   | PDE3A   | R.RVSSTV  | 0.643675939 | 0.96 | T443  | 1    |
| IPI00291205.4 | 5139   | PDE3A   | R.VNPVTS  | 0.777986561 | 0.9  | S408  | 1    |
| IPI00291205.4 | 5139   | PDE3A   | K.IS*PLSS | 0.726073545 | 0.94 | S520  | 1.02 |
| IPI00291427.2 | 91768  | CABLES1 | R.RNT*ID  | 0.431601138 | 0.04 | T415  | 0.34 |
| IPI00291510.3 | 3615   | IMPDH2  | R.LVGIISS | 0.096924105 | 0.94 | S160  | 1.28 |
| IPI00291510.3 | 3615   | IMPDH2  | K.KYEQGF  | 0.197661257 | 0.98 | S122  | 1.21 |
| IPI00291711.4 | 26030  | PLEKHG3 | K.GPLS*PI | 0.106353987 | 0.98 | S76   | 1.29 |
| IPI00291711.4 | 26030  | PLEKHG3 | R.RRES*L  | 0.296993866 | 0.98 | S741  | 1.07 |
| IPI00291755.5 | 23225  | NUP210  | R.KAS*PP  | 0.966676636 | 0.83 | S1874 | 0.97 |
| IPI00291755.5 | 23225  | NUP210  | R.KAS*PP  | 0.966676636 | 0.83 | S1874 | 0.97 |
| IPI00291916.4 | 55023  | PHIP    | R.GS*ISST | 0.773594539 | 0.92 | S674  | 0.92 |
| IPI00291916.4 | 55023  | PHIP    | R.AQS*YD  | 0.726073545 | 0.94 | S1315 | 1.04 |
| IPI00291916.4 | 55023  | PHIP    | R.GSIS*ST | 0.530774648 | 1    | S676  | 1.11 |
| IPI00291916.4 | 55023  | PHIP    | R.GSISST  | 0.32093792  | 1    | S679  | 1.11 |
| IPI00291916.4 | 55023  | PHIP    | R.GSISST  | 0.32093792  | 1    | S683  | 1.11 |
| IPI00291946.7 | 9100   | USP10   | R.IEFGVDI | 0.12765804  | 0.83 | T70   | 1.26 |
| IPI00291946.7 | 9100   | USP10   | R.IEFGVDI | 0.49616549  | 0.62 | S68   | 0.46 |
| IPI00291946.7 | 9100   | USP10   | R.TPSYSI  | 0.990601784 | 0.98 | T95   | 0.9  |

|               |               |           |             |      |      |      |
|---------------|---------------|-----------|-------------|------|------|------|
| IPI00291946.7 | 9100 USP10    | K.SWASLF  | 0.985805237 | 0.94 | S355 | 0.88 |
| IPI00291946.7 | 9100 USP10    | K.Y*SPPAI | 0.152571688 | 0.96 | Y364 | 1.2  |
| IPI00291946.7 | 9100 USP10    | K.YS*PPAI | 0.152571688 | 0.96 | S365 | 1.2  |
| IPI00292326.4 | 6674 SPAG1    | K.S*GRKH  | 0           | 0.71 | S354 | 0.04 |
| IPI00292387.5 | 9221 NOLC1    | K.LQTPNT  | 0.166517367 | 0.96 | T610 | 1.22 |
| IPI00292387.5 | 9221 NOLC1    | K.LQT*PN  | 0.166517367 | 0.69 | T607 | 1.32 |
| IPI00292387.5 | 9221 NOLC1    | K.IKLQT*P | 0.684201094 | 0.27 | T607 | 0.34 |
| IPI00292387.5 | 9221 NOLC1    | R.GGSISV  | 0.604563646 | 0.77 | S698 | 0.96 |
| IPI00292537.2 | 4790 NFKB1    | K.TTSQAH  | 0.001613065 | 0.69 | S904 | 1.32 |
| IPI00292537.2 | 4790 NFKB1    | K.TTSQAH  | 0.007240509 | 0.9  | S908 | 1.59 |
| IPI00292686.3 | 4488 MSX2     | R.EAHS*P  | 0.373234869 | 0.9  | S91  | 1.1  |
| IPI00292809.5 | 4139 MARK1    | R.VPAASP  | 0.139636808 | 0.96 | S573 | 1.13 |
| IPI00292809.5 | 4139 MARK1    | R.VPAAS*I | 0.139636808 | 0.96 | S566 | 1.13 |
| IPI00292809.5 | 4139 MARK1    | R.S*TFHG  | 0.373234869 | 0.96 | S590 | 1.15 |
| IPI00292809.5 | 4139 MARK1    | K.LDT*FCC | 0.604563646 | 0.98 | T193 | 1.13 |
| IPI00292953.6 | 26064 RAI14   | K.ISQDAD  | 0.373234869 | 0.96 | T254 | 1.03 |
| IPI00292953.6 | 26064 RAI14   | K.ISQDAD  | 0.27446972  | 0.96 | T252 | 1.03 |
| IPI00292953.6 | 26064 RAI14   | K.LGLVS*F | 0.181528891 | 0.72 | S515 | 1.02 |
| IPI00292953.6 | 26064 RAI14   | K.LGLVSP  | 0.181528891 | 0.58 | S518 | 0.87 |
| IPI00292953.6 | 26064 RAI14   | K.SSPSVL  | 0.726073545 | 1    | S422 | 0.99 |
| IPI00292953.6 | 26064 RAI14   | K.S*SPSVI | 0.296993866 | 1    | S414 | 1.03 |
| IPI00292975.4 | 54439 RBM27   | R.NLMGSE  | 0.116581414 | 0.92 | T477 | 1.18 |
| IPI00292975.4 | 54439 RBM27   | K.MIYSSSI | 0.506261018 | 0.88 | T796 | 0.96 |
| IPI00292975.4 | 54439 RBM27   | R.NLMGSE  | 0.214968943 | 0.96 | S475 | 1.15 |
| IPI00292975.4 | 54439 RBM27   | R.NLMGSE  | 0.214968943 | 0.96 | S474 | 1.15 |
| IPI00292975.4 | 54439 RBM27   | R.NLMGSE  | 0.27446972  | 1    | S472 | 1.12 |
| IPI00292975.4 | 54439 RBM27   | R.LQLGT*I | 0.197661257 | 1    | T447 | 1.21 |
| IPI00292988.6 | 25970 SH2B1   | R.ASGSLS  | 0.116581414 | 0.96 | S88  | 1.2  |
| IPI00293086.2 | 11244 ZHX1    | R.RKSTT*I | 0.088241621 | 0.81 | T9   | 1.04 |
| IPI00293188.5 | 55719 C10orf6 | R.SQSSDY  | 0.066203153 | 0.98 | T657 | 1.12 |
| IPI00293188.5 | 55719 C10orf6 | R.SQSS*D  | 0.066203153 | 0.98 | S654 | 1.12 |
| IPI00293331.3 | 10940 POP1    | R.VQAYEE  | 0.338692366 | 0.72 | S730 | 0.63 |
| IPI00293464.5 | 1642 DDB1     | R.SLS*TTM | 0.225432817 | 0.64 | S645 | 0.77 |
| IPI00293616.3 | 8653 DDX3Y    | R.GCHLLV  | 0.383343176 | 0.64 | T321 | 0.74 |
| IPI00293654.5 | 55132 LARP2   | K.LFDVSE  | 0.214968943 | 0.61 | S593 | 0.73 |
| IPI00293884.5 | 9493 KIF23    | K.KGS*QT  | 0.883273668 | 0.79 | S18  | 1.03 |
| IPI00293884.5 | 9493 KIF23    | R.S*VSPSI | 0.214968943 | 0.53 | S682 | 0.96 |
| IPI00293884.5 | 9493 KIF23    | K.KGSQT*  | 0.523719116 | 0.94 | T20  | 1.05 |
| IPI00293884.5 | 9493 KIF23    | K.IPTYNT* | 0.373234869 | 0.98 | T738 | 1.02 |
| IPI00293884.5 | 9493 KIF23    | R.SVS*PSI | 0.773594539 | 0.9  | S684 | 1.08 |
| IPI00293884.5 | 9493 KIF23    | R.RSST*V  | 0.096924105 | 0.98 | T809 | 1.29 |
| IPI00293884.5 | 9493 KIF23    | K.YMLTHC  | 0.001128958 | 0.92 | S867 | 1.17 |
| IPI00293884.5 | 9493 KIF23    | R.RS*STV  | 0.27446972  | 0.96 | S911 | 1.13 |
| IPI00293884.5 | 9493 KIF23    | R.SVSPS*I | 0.296993866 | 0.12 | S686 | 0.44 |
| IPI00293884.5 | 9493 KIF23    | R.SVS*PSI | 0.296993866 | 1    | S684 | 1.11 |
| IPI00293897.2 | 55789 DEPDC1B | K.RHS*IAI | 0.530774648 | 0.83 | S160 | 1.02 |
| IPI00294065.6 | 9950 GOLGA5   | R.KKS*EPI | 0.166517367 | 0.9  | S116 | 1.32 |
| IPI00294211.2 | 9785 DHX38    | R.VET*PSI | 0.108195276 | 0.94 | T117 | 0.85 |
| IPI00294391.2 | 10602 CDC42EP | K.LPRLS*C | 0.139636808 | 0.94 | S144 | 1.12 |
| IPI00294395.1 | 732 C8B       | R.DFGTHY  | 0.000892152 | 0.86 | T346 | 0.54 |
| IPI00294486.1 | 1852 DUSP9    | K.S*NISPN | 0.643675939 | 0.94 | S325 | 1.02 |

|               |              |           |             |            |      |
|---------------|--------------|-----------|-------------|------------|------|
| IPI00294486.1 | 1852 DUSP9   | K.SNIS*PN | 0.401648339 | 0.94 S328  | 1.02 |
| IPI00294575.7 | 996 CDC27    | R.EVTPILA | 0.166517367 | 0.94 T366  | 1.12 |
| IPI00294728.1 | 1657 DMXL1   | K.ILS*PFS | 0.501931941 | 0.96 S924  | 0.89 |
| IPI00294728.1 | 1657 DMXL1   | K.LSEAVW  | 0.684201094 | 0.94 S918  | 1.09 |
| IPI00294739.1 | 25939 SAMHD1 | R.NFTKPC  | 0.296993866 | 0.96 T592  | 1.22 |
| IPI00294739.1 | 25939 SAMHD1 | R.NFTKPC  | 0.116581414 | 0.03 T592  | 0.17 |
| IPI00294742.5 | 51574 LARP7  | R.KRSS*S  | 0.942907226 | 0.96 S306  | 0.94 |
| IPI00294742.5 | 51574 LARP7  | R.KRS*SS  | 0.942907226 | 0.96 S305  | 0.94 |
| IPI00294742.5 | 51574 LARP7  | R.KRSSSE  | 0.942907226 | 0.96 S312  | 0.94 |
| IPI00294744.6 | 5073 PARN    | R.NNS*FT  | 0.000181407 | 0.77 S557  | 1.82 |
| IPI00294926.5 | 23466 CBX6   | R.ISDVHF  | 0.726073545 | 0.07 S107  | 0.6  |
| IPI00295004.3 | 57679 ALS2   | K.SDS*RS  | 0.643675939 | 0.83 S1460 | 1.19 |
| IPI00295004.3 | 57679 ALS2   | R.S*ESPEI | 0.181528891 | 0.92 S1462 | 1.2  |
| IPI00295004.3 | 57679 ALS2   | R.SES*PEI | 0.32093792  | 0.92 S1464 | 1.22 |
| IPI00295502.3 | 58525 WIZ    | K.TPLALA  | 0.233505398 | 1 T998     | 1.14 |
| IPI00295502.3 | 58525 WIZ    | K.NPEDKS  | 0.73460299  | 0.98 S1006 | 0.92 |
| IPI00295502.3 | 58525 WIZ    | R.AADGGE  | 0.431601138 | 0.96 S1517 | 1.04 |
| IPI00295502.3 | 58525 WIZ    | R.SPS*DLI | 0.401648339 | 0.98 S1129 | 1.1  |
| IPI00295502.3 | 58525 WIZ    | R.S*PSDLI | 0.32093792  | 0.98 S1127 | 1.13 |
| IPI00295502.3 | 58525 WIZ    | K.NPEDKS  | 0.604563646 | 0.98 S1012 | 1    |
| IPI00295502.3 | 58525 WIZ    | R.SPSDLH  | 0.463105648 | 1 S1134    | 1.09 |
| IPI00295502.3 | 58525 WIZ    | K.SPQLSL  | 0.296993866 | 1 S1012    | 1.14 |
| IPI00295502.3 | 58525 WIZ    | K.TPLALA  | 0.166517367 | 1 S996     | 1.13 |
| IPI00295624.2 | 1627 DBN1    | R.MAPTPII | 0.431601138 | 0.94 T348  | 1.19 |
| IPI00295624.2 | 1627 DBN1    | R.MAPTPII | 0.431601138 | 0.94 S339  | 1.19 |
| IPI00295624.2 | 1627 DBN1    | R.MAPTPII | 0.373234869 | 0.98 T337  | 1.04 |
| IPI00295624.2 | 1627 DBN1    | R.MAPTPII | 0.166517367 | 0.86 T337  | 0.99 |
| IPI00295624.2 | 1627 DBN1    | R.MAPTPII | 0.166517367 | 0.86 T337  | 0.99 |
| IPI00295624.2 | 1627 DBN1    | R.LSS*PVI | 0.27446972  | 1 S144     | 1.13 |
| IPI00295624.2 | 1627 DBN1    | R.MAPTPII | 0.346340474 | 1 S341     | 1.08 |
| IPI00296078.4 | 7227 TRPS1   | K.AGFNYE  | 0.296993866 | 0.96 S99   | 1.11 |
| IPI00296078.4 | 7227 TRPS1   | R.RGS*GV  | 0.401648339 | 1 S892     | 1.01 |
| IPI00296078.4 | 7227 TRPS1   | R.NMLAFS  | 0.604563646 | 0.96 S115  | 1.07 |
| IPI00296078.4 | 7227 TRPS1   | K.ATEETG  | 0.756570768 | 0.94 S178  | 1.13 |
| IPI00296078.4 | 7227 TRPS1   | R.GSPS*Y  | 0.49616549  | 0.92 S805  | 0.98 |
| IPI00296078.4 | 7227 TRPS1   | R.GSPSY*  | 0.49616549  | 0.92 Y806  | 0.98 |
| IPI00296078.4 | 7227 TRPS1   | K.HPNY*S  | 0.822525206 | 1 Y1080    | 1.03 |
| IPI00296078.4 | 7227 TRPS1   | K.AGFNYE  | 0.463105648 | 0.98 S90   | 1.05 |
| IPI00296078.4 | 7227 TRPS1   | K.AGFNYE  | 0.401648339 | 0.98 S92   | 1.05 |
| IPI00296078.4 | 7227 TRPS1   | K.TDLLVN  | 0.463105648 | 0.9 S216   | 1.04 |
| IPI00296078.4 | 7227 TRPS1   | K.HPNYS*  | 0.822525206 | 1 S1081    | 0.94 |
| IPI00296078.4 | 7227 TRPS1   | R.GADILR  | 0.872720802 | 0.98 T807  | 0.99 |
| IPI00296078.4 | 7227 TRPS1   | R.GADILR  | 0.872720802 | 0.98 Y806  | 0.99 |
| IPI00296078.4 | 7227 TRPS1   | K.SKTDLL  | 0.957149097 | 0.96 S216  | 0.9  |
| IPI00296318.6 | 79733 E2F8   | K.WTGPEI  | 0.49616549  | 0.86 S357  | 1.25 |
| IPI00296318.6 | 79733 E2F8   | K.WTGPEI  | 0.026666866 | 0.94 S355  | 1.19 |
| IPI00296318.6 | 79733 E2F8   | K.WTGPEI  | 0.026666866 | 0.94 S358  | 1.19 |
| IPI00296432.1 | 55677 IWS1   | R.HQAS*D  | 0.873506301 | 0.92 S235  | 0.91 |
| IPI00296485.3 | 55201 MAP1S  | R.RSAS*P  | 0.106353987 | 0.83 S731  | 1.17 |
| IPI00296485.3 | 55201 MAP1S  | R.RS*ASP  | 0.106353987 | 0.83 S729  | 1.17 |
| IPI00296485.3 | 55201 MAP1S  | R.S*ASPH  | 0.214968943 | 0.88 S729  | 1.24 |

|               |       |         |           |             |      |       |      |
|---------------|-------|---------|-----------|-------------|------|-------|------|
| IPI00296485.3 | 55201 | MAP1S   | R.SAS*PH  | 0.214968943 | 0.88 | S731  | 1.24 |
| IPI00296485.3 | 55201 | MAP1S   | K.AVPMAF  | 0.253322457 | 1    | S759  | 1.17 |
| IPI00296485.3 | 55201 | MAP1S   | K.AVPMAF  | 0.253322457 | 1    | S762  | 1.17 |
| IPI00297139.1 | 23263 | MCF2L   | R.ALEQSC  | 0.096924105 | 0.86 | S933  | 1.49 |
| IPI00297139.1 | 23263 | MCF2L   | R.ALEQSC  | 0.554790037 | 0.69 | S943  | 0.71 |
| IPI00297211.1 | 8467  | SMARCA5 | K.GGPEG\  | 0.233505398 | 0.96 | S66   | 1.12 |
| IPI00297211.1 | 8467  | SMARCA5 | K.GGPEG\  | 0.530774648 | 0.94 | S66   | 0.96 |
| IPI00297234.1 | 672   | BRCA1   | K.KLESS*E | 0.116581414 | 0.88 | S1212 | 1.31 |
| IPI00297234.1 | 672   | BRCA1   | K.VVDVEE  | 0.296993866 | 0.79 | T1509 | 1.06 |
| IPI00297234.1 | 672   | BRCA1   | K.KLES*SE | 0.401648339 | 0.92 | S1211 | 1.04 |
| IPI00297234.1 | 672   | BRCA1   | K.KLESSE  | 0.401648339 | 0.92 | S1176 | 1.04 |
| IPI00297254.4 | 23094 | SIPA1L3 | K.RPVS*FI | 0.152571688 | 0.88 | S1135 | 1    |
| IPI00297322.3 | 84364 | ZNF289  | K.YKDNPF  | 0.004600913 | 0.69 | S368  | 1.09 |
| IPI00297396.4 | 57455 | REXO1   | K.ETAVQC  | 0.604563646 | 0.92 | S358  | 1.01 |
| IPI00297723.1 | 10180 | RBM6    | R.EGETQC  | 0.643675939 | 0.98 | S362  | 0.94 |
| IPI00297851.1 | 1105  | CHD1    | R.S*PFEH! | 0.604563646 | 0.98 | S1689 | 1.06 |
| IPI00297851.1 | 1105  | CHD1    | R.ASSSGF  | 0.233505398 | 0.98 | S1677 | 1.16 |
| IPI00297851.1 | 1105  | CHD1    | K.S*SPSIL | 0.414622005 | 0.86 | S89   | 1.01 |
| IPI00297851.1 | 1105  | CHD1    | K.SS*PSIL | 0.414622005 | 0.86 | S90   | 1.01 |
| IPI00297900.4 | 1662  | DDX10   | K.TANS*P( | 0.604563646 | 0.96 | S7    | 0.99 |
| IPI00298612.1 | 10295 | BCKDK   | R.STSAT*I | 0.907673183 | 0.94 | T35   | 1.17 |
| IPI00298612.1 | 10295 | BCKDK   | R.STS*ATI | 0.907673183 | 0.94 | S33   | 1.17 |
| IPI00298696.1 | 6949  | TCOF1   | R.S*PAGP. | 0.116581414 | 0.92 | S967  | 1.27 |
| IPI00298696.1 | 6949  | TCOF1   | R.SPAGPA  | 0.088241621 | 0.98 | T983  | 1.26 |
| IPI00298696.1 | 6949  | TCOF1   | K.TSQVGA  | 0.233505398 | 1    | S381  | 1.14 |
| IPI00298696.1 | 6949  | TCOF1   | K.TSQVGA  | 0.152571688 | 1    | S381  | 1.12 |
| IPI00298696.1 | 6949  | TCOF1   | R.SPAGPA  | 0.106353987 | 1    | S982  | 1.32 |
| IPI00298696.1 | 6949  | TCOF1   | R.AALAPA  | 0.152571688 | 1    | S906  | 1.23 |
| IPI00298696.1 | 6949  | TCOF1   | K.TSQVGA  | 0.197661257 | 1    | S298  | 1.17 |
| IPI00298696.1 | 6949  | TCOF1   | K.SLGNILC | 0.373234869 | 1    | S583  | 1.11 |
| IPI00298696.1 | 6949  | TCOF1   | K.TVANLL! | 0.116581414 | 1    | S156  | 1.22 |
| IPI00298731.2 | 5514  | PPP1R10 | K.YKPLNT  | 0.643675939 | 0.98 | T268  | 1.04 |
| IPI00298731.2 | 5514  | PPP1R10 | K.TSTEPS  | 0.072926818 | 0.83 | T332  | 1.08 |
| IPI00298731.2 | 5514  | PPP1R10 | K.GPQGPC  | 0.834430989 | 0.88 | S591  | 0.82 |
| IPI00298731.2 | 5514  | PPP1R10 | K.GPQGPC  | 0.966004444 | 0.88 | S594  | 0.82 |
| IPI00298731.2 | 5514  | PPP1R10 | K.TSTEPS  | 0.604563646 | 0.96 | S337  | 0.96 |
| IPI00298731.2 | 5514  | PPP1R10 | K.TSTEPS  | 0.214968943 | 0.98 | S331  | 1.03 |
| IPI00298731.2 | 5514  | PPP1R10 | K.VLS*PT/ | 0.743182508 | 1    | S313  | 1    |
| IPI00298788.4 | 3609  | ILF3    | R.S*GGNS  | 0.878390339 | 0.88 | S820  | 0.9  |
| IPI00298788.4 | 3609  | ILF3    | R.SGGNS\  | 0.431601138 | 0.9  | Y840  | 0.95 |
| IPI00298788.4 | 3609  | ILF3    | K.VLQDMC  | 0.27446972  | 0.92 | S477  | 1.03 |
| IPI00298788.4 | 3609  | ILF3    | K.VLQDMC  | 0.152571688 | 0.98 | S476  | 1.19 |
| IPI00298788.4 | 3609  | ILF3    | R.DSSKGE  | 0.92716125  | 0.96 | T486  | 0.88 |
| IPI00298788.4 | 3609  | ILF3    | R.DSS*KG  | 0.604563646 | 0.96 | S477  | 0.88 |
| IPI00298788.4 | 3609  | ILF3    | K.VLQDMC  | 0.233505398 | 0.88 | S476  | 1.13 |
| IPI00298788.4 | 3609  | ILF3    | K.LFPDT*F | 0.604563646 | 0.88 | T596  | 0.96 |
| IPI00298788.4 | 3609  | ILF3    | K.GEDS*A  | 0.49616549  | 0.9  | S482  | 1.05 |
| IPI00298788.4 | 3609  | ILF3    | K.GEDSAE  | 0.49616549  | 0.9  | T486  | 1.05 |
| IPI00298788.4 | 3609  | ILF3    | R.DS*SKG  | 0.726073545 | 0.94 | S476  | 0.88 |
| IPI00298788.4 | 3609  | ILF3    | K.GEDS*A  | 0.32093792  | 0.98 | S482  | 1.04 |
| IPI00298788.4 | 3609  | ILF3    | K.LFPDT*F | 0.800118017 | 0.81 | T596  | 0.93 |

|               |               |           |             |            |      |
|---------------|---------------|-----------|-------------|------------|------|
| IPI00298788.4 | 3609 ILF3     | R.DSSKGE  | 0.373234869 | 1 S482     | 1.05 |
| IPI00298788.4 | 3609 ILF3     | R.DSSKGE  | 0.373234869 | 1 S482     | 1.06 |
| IPI00299063.1 | 6786 STIM1    | R.SHS*PS  | 0.37570848  | 0.79 S618  | 0.81 |
| IPI00299214.5 | 7083 TK1      | R.KLFAPQ  | 0.566916624 | 0.98 S273  | 1.01 |
| IPI00299214.5 | 7083 TK1      | K.LFAPQQ  | 0.726073545 | 1 S273     | 1    |
| IPI00299254.3 | 9669 EIF5B    | K.NKPGPN  | 0.373234869 | 0.94 S214  | 1.02 |
| IPI00299254.3 | 9669 EIF5B    | K.LLQAQC  | 0.346340474 | 1 S438     | 1.05 |
| IPI00299254.3 | 9669 EIF5B    | K.LLQAQC  | 0.346340474 | 1 S435     | 1.05 |
| IPI00299254.3 | 9669 EIF5B    | K.VEMYS*  | 0.373234869 | 1 S135     | 1.11 |
| IPI00299254.3 | 9669 EIF5B    | K.VEMY*S  | 0.373234869 | 1 Y134     | 1.11 |
| IPI00299254.3 | 9669 EIF5B    | K.VEMYS*  | 0.463105648 | 0.98 S135  | 1.06 |
| IPI00299254.3 | 9669 EIF5B    | K.VEMY*S  | 0.463105648 | 0.98 Y134  | 1.06 |
| IPI00299263.5 | 26286 ARFGAP3 | R.SVISHS\ | 0.27446972  | 0.96 S331  | 0.99 |
| IPI00299333.1 | 10736 SIX2    | R.EWYAH   | 0.32093792  | 0.9 S150   | 0.85 |
| IPI00299417.3 | 8563 THOC5    | R.RPT*LG\ | 0.166517367 | 0.88 T328  | 1.05 |
| IPI00299506.7 | 2673 GFPT1    | R.VDS*TT  | 0.253322457 | 1 S243     | 1.17 |
| IPI00299507.5 | 23397 NCAPH   | R.KAPLNIF | 0.566916624 | 0.98 T49   | 1.09 |
| IPI00299524.1 | 9918 NCAPD2   | R.YQPLAS  | 0.849757871 | 0.62 T1339 | 0.79 |
| IPI00299526.6 | 23512 SUZ12   | R.NS*ESLI | 0.463105648 | 0.92 S382  | 1.06 |
| IPI00299526.6 | 23512 SUZ12   | K.ASMSEF  | 0.795669231 | 0.98 S546  | 1.08 |
| IPI00299526.6 | 23512 SUZ12   | R.LYFHSD  | 0.643675939 | 0.94 S583  | 1.04 |
| IPI00299763.1 | 10451 VAV3    | K.WLEQFE  | 0.096924105 | 0.55 S511  | 0.91 |
| IPI00299763.1 | 10451 VAV3    | R.TPIALAT | 0.566916624 | 0.96 T131  | 1.07 |
| IPI00299763.1 | 10451 VAV3    | R.TPIALAT | 0.566916624 | 0.96 S134  | 1.07 |
| IPI00299763.1 | 10451 VAV3    | R.NYSGT*  | 0.01942062  | 0.94 T606  | 1.35 |
| IPI00299890.4 | 7581 ZNF33A   | R.TLCDSS  | 0.756144089 | 0.96 S267  | 1    |
| IPI00300222.5 | 56987 BBX     | K.NIPSIFN | 0.044561326 | 0.76 S822  | 1.21 |
| IPI00300222.5 | 56987 BBX     | K.FNSLPQ  | 0.530774648 | 0.88 S704  | 1.03 |
| IPI00300222.5 | 56987 BBX     | K.LWAFPS  | 0.072926818 | 0.9 S178   | 1.16 |
| IPI00300222.5 | 56987 BBX     | K.KFNSLP  | 0.32093792  | 1 S704     | 1.12 |
| IPI00300222.5 | 56987 BBX     | R.TADGR\  | 0.296993866 | 0.98 T849  | 1.1  |
| IPI00300222.5 | 56987 BBX     | R.TADGR\  | 0.296993866 | 0.98 S844  | 1.1  |
| IPI00300789.1 | 27067 STAU2   | K.VISGTTL | 0.643675939 | 0.96 S440  | 1.08 |
| IPI00300789.1 | 27067 STAU2   | K.GILHLS* | 0.572822052 | 0.71 S416  | 0.57 |
| IPI00301034.2 | 65220 NADK    | K.S*RSLS/ | 0.431601138 | 0.96 S44   | 1.22 |
| IPI00301034.2 | 65220 NADK    | K.SRS*LS/ | 0.431601138 | 0.96 S46   | 1.22 |
| IPI00301034.2 | 65220 NADK    | R.S*LHGP  | 0.021601024 | 0.98 S64   | 1.38 |
| IPI00301041.2 | 55193 PBRM1   | R.ATSPSS  | 0.9240167   | 0.88 S14   | 0.72 |
| IPI00301041.2 | 55193 PBRM1   | R.ATSPSS  | 0.12765804  | 0.98 S13   | 1.21 |
| IPI00301041.2 | 55193 PBRM1   | R.ATSPSS  | 0.054409842 | 0.98 S16   | 1.21 |
| IPI00301041.2 | 55193 PBRM1   | R.ATSPSS  | 0.296993866 | 0.98 S25   | 1.24 |
| IPI00301041.2 | 55193 PBRM1   | R.RATS*P  | 0.214968943 | 0.98 S10   | 1.12 |
| IPI00301041.2 | 55193 PBRM1   | R.ATS*PS  | 0.346340474 | 0.98 S10   | 1.06 |
| IPI00301041.2 | 55193 PBRM1   | R.AT*SPS  | 0.296993866 | 0.98 T9    | 1.12 |
| IPI00301263.2 | 790 CAD       | R.IHRAS*E | 0.002387219 | 0.94 S1859 | 0.55 |
| IPI00301293.1 |               | K.ILCKS*P | 0.777986561 | 0.96 S1861 | 1.01 |
| IPI00301293.1 |               | K.LDLAGT  | 0.029596689 | 0.81 S1207 | 0.95 |
| IPI00301293.1 |               | K.LDLLGN  | 0.604563646 | 0.94 S1937 | 0.97 |
| IPI00301293.1 |               | K.IACKS*P | 0.726073545 | 0.85 S2105 | 0.92 |
| IPI00301293.1 |               | K.TPVQYS  | 0.956313787 | 0.98 S357  | 1.11 |
| IPI00301293.1 |               | K.LDLPGN  | 0.566916624 | 0.92 S2299 | 0.98 |

|               |                |            |             |      |       |      |
|---------------|----------------|------------|-------------|------|-------|------|
| IPI00301293.1 |                | R.RPQT*P   | 0.952395062 | 0.92 | T1335 | 0.97 |
| IPI00301293.1 |                | K.AMHTPK   | 0.643675939 | 0.96 | T1797 | 0.99 |
| IPI00301293.1 |                | R.RPQTPK   | 8.51E-13    | 0.9  | T1347 | 0.9  |
| IPI00301293.1 |                | K.IPCKS*P  | 0.296993866 | 0.86 | S2588 | 0.8  |
| IPI00301293.1 |                | K.IACKSPF  | 0.868109485 | 0.98 | S1136 | 0.99 |
| IPI00301293.1 |                | K.IACKS*P  | 0.868109485 | 0.98 | S1131 | 0.99 |
| IPI00301293.1 |                | K.AQSLVIF  | 0.566916624 | 1    | S584  | 1.01 |
| IPI00301311.1 | 6418 SET       | K.ELNSNH   | 0.253322457 | 0.98 | T23   | 1.15 |
| IPI00301311.1 | 6418 SET       | K.ELNSNH   | 0.233505398 | 0.98 | S24   | 1.15 |
| IPI00301311.1 | 6418 SET       | K.ELNS*NI  | 0.233505398 | 0.98 | S15   | 1.15 |
| IPI00301311.1 | 6418 SET       | K.ELNSNH   | 0.373234869 | 0.94 | T23   | 1.11 |
| IPI00301421.5 | 51530 ZC3HC1   | R.TRSWDI   | 0.49616549  | 0.96 | S359  | 1.08 |
| IPI00301421.5 | 51530 ZC3HC1   | K.NWGAVI   | 0.431601138 | 0.81 | T28   | 1.17 |
| IPI00301421.5 | 51530 ZC3HC1   | K.DTSATS   | 0.800289022 | 0.96 | S62   | 0.91 |
| IPI00301421.5 | 51530 ZC3HC1   | R.TRSWDI   | 0.088241621 | 1    | S359  | 1.25 |
| IPI00301421.5 | 51530 ZC3HC1   | R.TRSWDI   | 0.072926818 | 1    | S358  | 1.25 |
| IPI00301421.5 | 51530 ZC3HC1   | R.SQDATF   | 0.088241621 | 0.85 | S338  | 0.9  |
| IPI00301421.5 | 51530 ZC3HC1   | R.SMGTFI   | 0.604563646 | 0.9  | T387  | 1.02 |
| IPI00301421.5 | 51530 ZC3HC1   | R.SMGTFI   | 0.530774648 | 1    | S394  | 1.04 |
| IPI00301421.5 | 51530 ZC3HC1   | K.DTSATS   | 0.849082022 | 0.9  | S58   | 0.9  |
| IPI00301421.5 | 51530 ZC3HC1   | R.LPLVPEI  | 0.32093792  | 0.98 | S321  | 1.05 |
| IPI00301421.5 | 51530 ZC3HC1   | R.SWDSSI   | 0.684519102 | 0.76 | S370  | 0.92 |
| IPI00301421.5 | 51530 ZC3HC1   | R.T*RSWD   | 0.139636808 | 1    | T352  | 1.19 |
| IPI00301421.5 | 51530 ZC3HC1   | R.TRS*WD   | 0.139636808 | 1    | S354  | 1.19 |
| IPI00301421.5 | 51530 ZC3HC1   | R.SMGTFI   | 0.27446972  | 1    | S395  | 1.14 |
| IPI00301421.5 | 51530 ZC3HC1   | K.NWGAVI   | 0.214968943 | 1    | S24   | 1.15 |
| IPI00301421.5 | 51530 ZC3HC1   | R.SQDATF   | 0.604563646 | 1    | S344  | 1.03 |
| IPI00301421.5 | 51530 ZC3HC1   | R.SMGTFI   | 0.463105648 | 1    | S395  | 1.04 |
| IPI00301465.2 | 55355 DKFZp762 | R.VTPLPS   | 0.060044376 | 0.83 | S185  | 1.23 |
| IPI00301465.2 | 55355 DKFZp762 | K.WLIS*PV  | 0.831562154 | 0.98 | S412  | 1.01 |
| IPI00301465.2 | 55355 DKFZp762 | R.GGPAS*   | 0.197661257 | 0.98 | S473  | 1.08 |
| IPI00301503.8 | 6434 SFRS10    | R.RSPS*P   | 0.401648339 | 0.94 | S266  | 1.15 |
| IPI00301609.7 | 91754 NEK9     | K.VASEAP   | 0.463105648 | 0.98 | S869  | 1.06 |
| IPI00301609.7 | 91754 NEK9     | K.VASEAP   | 0.401648339 | 0.98 | S868  | 1.06 |
| IPI00301719.1 | 51095 TRNT1    | K.VGIS*SC  | 0.463105648 | 1    | S379  | 1.09 |
| IPI00301719.1 | 51095 TRNT1    | K.VGISS*C  | 0.253322457 | 1    | S380  | 1.09 |
| IPI00301870.2 | 55657 ZNF692   | R.LLPS*PV  | 0.756144089 | 0.98 | S186  | 1.08 |
| IPI00301936.3 | 1994 ELAVL1    | K.NVALLSI  | 0.684201094 | 1    | S202  | 1.04 |
| IPI00301987.5 | 54468 FLJ20323 | R.GFSQYC   | 0.214968943 | 0.96 | S766  | 0.98 |
| IPI00302133.2 | 56302 TRPV5    | K.RILES*P  | 0.152571688 | 1    | S47   | 1.21 |
| IPI00302146.4 | 23 ABCF1       | K.LSVPTSI  | 0.346340474 | 0.92 | S109  | 1.03 |
| IPI00302146.4 | 23 ABCF1       | K.QQPPEFI  | 0.873506301 | 0.9  | S22   | 1.25 |
| IPI00302146.4 | 23 ABCF1       | K.KLS*VP1  | 0.401648339 | 0.62 | S105  | 0.92 |
| IPI00302146.4 | 23 ABCF1       | K.KLSVPTI  | 0.040276449 | 1    | T108  | 1.24 |
| IPI00302146.4 | 23 ABCF1       | K.KLSVPTI  | 0.253322457 | 0.98 | T108  | 1.05 |
| IPI00302146.4 | 23 ABCF1       | K.KLSVPTI  | 0.233505398 | 1    | S109  | 1.11 |
| IPI00302146.4 | 23 ABCF1       | K.LSVPT*SI | 0.139636808 | 1    | T108  | 1.19 |
| IPI00302146.4 | 23 ABCF1       | K.KLS*VP1  | 0.27446972  | 1    | S105  | 1.12 |
| IPI00302146.4 | 23 ABCF1       | K.LSVPT*SI | 0.373234869 | 1    | T108  | 1.15 |
| IPI00302156.4 | 26130 GAPVD1   | K.SSSLEM   | 0.568296053 | 0.71 | T469  | 1.3  |
| IPI00302156.4 | 26130 GAPVD1   | R.ELPPAA   | 0.080258071 | 0.96 | S976  | 1.22 |

|               |        |          |           |             |      |       |      |
|---------------|--------|----------|-----------|-------------|------|-------|------|
| IPI00302156.4 | 26130  | GAPVD1   | R.ELPPAA  | 0.139636808 | 0.98 | S979  | 1.19 |
| IPI00302156.4 | 26130  | GAPVD1   | R.DEALQN  | 0.72279082  | 0.77 | S1105 | 0.99 |
| IPI00302156.4 | 26130  | GAPVD1   | R.LQELES  | 0.684519102 | 0.94 | S746  | 1.02 |
| IPI00302156.4 | 26130  | GAPVD1   | R.LQELES  | 0.684519102 | 0.94 | T606  | 1.02 |
| IPI00302156.4 | 26130  | GAPVD1   | R.SRS*SD  | 0.044561326 | 0.98 | S929  | 1.4  |
| IPI00302594.2 |        |          | R.RRAS*Q  | 0.769214181 | 0.92 | S461  | 1.05 |
| IPI00302594.2 |        |          | R.SFELPP  | 0.530774648 | 0.94 | S661  | 1.01 |
| IPI00302594.2 |        |          | R.RAS*QE  | 0.166517367 | 1    | S461  | 1.04 |
| IPI00302647.4 | 54862  | CC2D1A   | K.GPASTP  | 0.214968943 | 0.98 | T206  | 1.19 |
| IPI00302647.4 | 54862  | CC2D1A   | K.GPASTP  | 0.214968943 | 0.98 | S208  | 1.19 |
| IPI00302829.5 | 5925   | RB1      | K.ISEGLP1 | 0.005777772 | 0.94 | T826  | 1.22 |
| IPI00302829.5 | 5925   | RB1      | R.SPY*KFI | 0.233505398 | 0.96 | Y790  | 1.21 |
| IPI00302829.5 | 5925   | RB1      | K.TLQTDS  | 0.296993866 | 0.9  | T356  | 1.1  |
| IPI00302829.5 | 5925   | RB1      | R.KSNLDE  | 0.106353987 | 0.9  | T373  | 1.04 |
| IPI00302829.5 | 5925   | RB1      | R.S*PYKFI | 0.106353987 | 0.98 | S788  | 1.26 |
| IPI00302829.5 | 5925   | RB1      | R.KS*NLDI | 0.106353987 | 0.98 | S360  | 1.2  |
| IPI00302829.5 | 5925   | RB1      | K.ISEGLP1 | 0.152571688 | 1    | T821  | 1.18 |
| IPI00302829.5 | 5925   | RB1      | R.IPGGNIY | 0.139636808 | 0.61 | S807  | 1.03 |
| IPI00302829.5 | 5925   | RB1      | R.IPGGNIY | 0.139636808 | 0.96 | S807  | 1.21 |
| IPI00303099.2 | 55143  | CDCA8    | R.LEVSMV  | 0.463105648 | 0.94 | T189  | 1.02 |
| IPI00303099.2 | 55143  | CDCA8    | R.IYNIS*G | 0.643675939 | 0.94 | S215  | 0.94 |
| IPI00303099.2 | 55143  | CDCA8    | R.IYNISGN | 0.933447376 | 0.98 | S219  | 0.91 |
| IPI00303343.5 | 58506  | SR-A1    | R.S*PFLKF | 9.19E-11    | 0.67 | S874  | 2.91 |
| IPI00303343.5 | 58506  | SR-A1    | R.FDIYDPI | 0.253322457 | 0.92 | S239  | 0.89 |
| IPI00303797.3 | 673    | BRAF     | R.WS*GSF  | 0.166517367 | 0.66 | S605  | 1.09 |
| IPI00303812.7 | 79886  | C9orf82  | K.SVNEILC | 0.751731134 | 0.74 | S312  | 1.03 |
| IPI00303883.5 | 57590  | WDFY1    | K.IWDMTP  | 0.726073545 | 1    | S365  | 1    |
| IPI00303991.2 | 60686  | C14orf93 | R.HSLGLT  | 0.066203153 | 0.76 | S285  | 1.05 |
| IPI00304111.1 | 5595   | MAPK3    | R.IADPEHI | 0.106353987 | 0.96 | T202  | 1.21 |
| IPI00304111.1 | 5595   | MAPK3    | R.IADPEHI | 0.054409842 | 0.96 | Y204  | 1.21 |
| IPI00304235.1 | 4763   | NF1      | K.S*LLLTD | 0.858914691 | 0.88 | S2439 | 1.11 |
| IPI00304235.1 | 4763   | NF1      | K.GSEGYL  | 0.080258071 | 0.94 | S2494 | 1.17 |
| IPI00304379.1 | 7398   | USP1     | K.ATSDTL  | 0.346340474 | 0.98 | S313  | 1.08 |
| IPI00304409.3 | 23589  | CARHSP1  | K.HETWSC  | 0.726073545 | 1    | S146  | 1    |
| IPI00304409.3 | 23589  | CARHSP1  | R.GNVVPS  | 0.03637398  | 0.98 | S41   | 1.36 |
| IPI00304409.3 | 23589  | CARHSP1  | R.GNVVPS  | 0.03637398  | 0.98 | T45   | 1.36 |
| IPI00304493.5 | 153443 | SRFBP1   | K.AVTIANE | 0.346340474 | 0.98 | S208  | 1.11 |
| IPI00304493.5 | 153443 | SRFBP1   | K.TRS*LDI | 0.373234869 | 0.69 | S367  | 0.75 |
| IPI00304493.5 | 153443 | SRFBP1   | K.T*RSLDI | 0.373234869 | 0.69 | T365  | 0.75 |
| IPI00304493.5 | 153443 | SRFBP1   | K.AVTIANE | 0.463105648 | 0.98 | S203  | 1.07 |
| IPI00304493.5 | 153443 | SRFBP1   | K.AVTIANE | 0.566916624 | 1    | S203  | 1.05 |
| IPI00304527.4 | 222584 | FAM83B   | K.RHSY*AI | 0.080258071 | 0.92 | Y389  | 1.15 |
| IPI00304589.3 | 85456  | TNKS1BP  | K.RDS*LG  | 0.900575286 | 0.88 | S872  | 1.21 |
| IPI00304589.3 | 85456  | TNKS1BP  | K.VNLFPG  | 0.92716125  | 0.94 | S1652 | 0.83 |
| IPI00304589.3 | 85456  | TNKS1BP  | K.VNLFPG  | 0.92716125  | 0.94 | S1654 | 0.83 |
| IPI00304589.3 | 85456  | TNKS1BP  | R.KEVLAS  | 0.296993866 | 0.96 | S185  | 1.14 |
| IPI00304589.3 | 85456  | TNKS1BP  | R.KEVLAS  | 0.296993866 | 0.96 | S178  | 1.14 |
| IPI00304589.3 | 85456  | TNKS1BP  | R.TEAQDL  | 0.088241621 | 0.92 | S672  | 1.16 |
| IPI00304589.3 | 85456  | TNKS1BP  | R.GS*GGL  | 0.152571688 | 0.98 | S1024 | 1.14 |
| IPI00304589.3 | 85456  | TNKS1BP  | R.GSGGLF  | 0.684201094 | 0.94 | S1029 | 1.11 |
| IPI00304589.3 | 85456  | TNKS1BP  | R.S*FGTR  | 0.139636808 | 0.9  | S976  | 1.36 |

|               |                |           |             |      |       |      |
|---------------|----------------|-----------|-------------|------|-------|------|
| IPI00304589.3 | 85456 TNKS1BP  | R.SFGTRF  | 0.139636808 | 0.9  | S984  | 1.36 |
| IPI00304589.3 | 85456 TNKS1BP  | R.SFGTRF  | 0.139636808 | 0.9  | S983  | 1.36 |
| IPI00304596.3 | 4841 NONO      | R.FACHS*  | 0.643675939 | 0.98 | S147  | 0.95 |
| IPI00304596.3 | 4841 NONO      | R.FGQAAT  | 0.604563646 | 0.14 | T450  | 0.08 |
| IPI00304742.4 | 6793 STK10     | K.RDSFIG  | 0.181528891 | 0.9  | Y197  | 1.22 |
| IPI00304742.4 | 6793 STK10     | K.RDSFIG  | 0.27446972  | 0.98 | T195  | 1.07 |
| IPI00304742.4 | 6793 STK10     | K.RDS*FIG | 0.181528891 | 0.98 | S191  | 1.07 |
| IPI00304742.4 | 6793 STK10     | R.ILRLS*T | 0.27446972  | 0.98 | S13   | 1.12 |
| IPI00304885.1 | 1060 CENPC1    | K.IKDTCIQ | 0.401648339 | 0.98 | S75   | 1.05 |
| IPI00304885.1 | 1060 CENPC1    | K.IKDTCIQ | 0.401648339 | 0.98 | S73   | 1.05 |
| IPI00304885.1 | 1060 CENPC1    | K.ILATDVE | 0.431601138 | 1    | S133  | 1.01 |
| IPI00304932.2 | 23378 KIAA0409 | R.ALEAAS  | 0.096924105 | 0.66 | S62   | 1.21 |
| IPI00304958.2 | 54758 KLHDC4   | K.QVLTAP  | 0.139636808 | 0.96 | S382  | 1.19 |
| IPI00304958.2 | 54758 KLHDC4   | K.QVLTAP  | 0.116581414 | 1    | S382  | 1.22 |
| IPI00305068.5 | 24148 PRPF6    | K.GYLTDL  | 0.001272035 | 0.76 | S279  | 1.07 |
| IPI00305068.5 | 24148 PRPF6    | K.GYLT*DI | 0.346340474 | 0.81 | T275  | 0.82 |
| IPI00305282.2 | 10111 RAD50    | R.EMMIVM  | 0.017448313 | 0.74 | T1113 | 1.26 |
| IPI00305282.2 | 10111 RAD50    | R.VFQT*E  | 0.27446972  | 0.98 | T690  | 1.12 |
| IPI00305305.3 | 6494 SIPA1     | R.SLSDE   | 0.346340474 | 0.76 | S873  | 1.03 |
| IPI00305305.3 | 6494 SIPA1     | K.PSVPSA  | 0.181528891 | 0.96 | S884  | 1.24 |
| IPI00305305.3 | 6494 SIPA1     | R.TEFLHS  | 0.970843959 | 1    | S839  | 1.22 |
| IPI00305344.6 | 23164 M-RIP    | R.TKDQPC  | 0.088241621 | 0.98 | S216  | 1.42 |
| IPI00305344.6 | 23164 M-RIP    | R.DFTNEA  | 0.233505398 | 0.9  | S361  | 1.23 |
| IPI00305344.6 | 23164 M-RIP    | R.DFTNEA  | 0.021601024 | 0.96 | S364  | 1.25 |
| IPI00305430.3 | 54478 FAM64A   | K.STRLSG  | 0.303680857 | 0.96 | S151  | 0.96 |
| IPI00305430.3 | 54478 FAM64A   | K.STRLS*C | 0.303680857 | 0.96 | S144  | 0.96 |
| IPI00305589.3 | 5208 PFKFB2    | R.RNS*FTI | 0.12765804  | 0.98 | S466  | 1.2  |
| IPI00305589.3 | 5208 PFKFB2    | R.NS*FTPI | 0.952395062 | 0.31 | S466  | 0.58 |
| IPI00305622.4 | 7051 TGM1      | K.AVET*A  | 0.665546864 | 0.85 | T559  | 1.05 |
| IPI00305822.1 | 55771 PRR11    | R.KVDVER  | 0.89791754  | 0.96 | T314  | 0.91 |
| IPI00305868.3 | 65983 GRAMD3   | K.ACRS*P  | 0.957149097 | 0.94 | S44   | 1.13 |
| IPI00305868.3 | 65983 GRAMD3   | K.SVCGHL  | 0.072926818 | 0.86 | T220  | 1.06 |
| IPI00305868.3 | 65983 GRAMD3   | K.SVCGHL  | 0.072926818 | 0.86 | S221  | 1.06 |
| IPI00305868.3 | 65983 GRAMD3   | K.S*SFDG  | 0.27446972  | 0.9  | S71   | 1.15 |
| IPI00305868.3 | 65983 GRAMD3   | R.ADRPSE  | 0.643675939 | 0.98 | S252  | 0.99 |
| IPI00305922.5 | 84993 UBL7     | R.DMPGG   | 0.643675939 | 0.98 | S230  | 0.99 |
| IPI00306087.5 | 55135 WDR79    | R.GDPPRL  | 0.166517367 | 0.9  | S54   | 1.05 |
| IPI00306087.5 | 55135 WDR79    | K.TLETQP  | 0.214968943 | 0.98 | S26   | 1.09 |
| IPI00306087.5 | 55135 WDR79    | R.VFPEPT  | 0.166517367 | 0.69 | S491  | 0.98 |
| IPI00306170.5 | 10634 GAS2L1   | R.VS*SPSI | 0.066203153 | 0.83 | S489  | 1.24 |
| IPI00306170.5 | 10634 GAS2L1   | R.RYS*GD  | 0.643675939 | 0.72 | S352  | 1    |
| IPI00306299.3 | 55837 EAPP     | R.YYDDIYI | 0.447034483 | 0.88 | S109  | 1.04 |
| IPI00306301.1 | 5160 PDHA1     | R.YHGHS*  | 0.360667889 | 1    | S331  | 0.78 |
| IPI00306301.1 | 5160 PDHA1     | R.YGMGT   | 0.147475653 | 0.96 | S270  | 0.85 |
| IPI00306301.1 | 5160 PDHA1     | R.YHGHS   | 0.296993866 | 0.98 | Y339  | 1.16 |
| IPI00306301.1 | 5160 PDHA1     | R.YHGHS*  | 0.604563646 | 1    | S331  | 1    |
| IPI00306301.1 | 5160 PDHA1     | R.Y*HGHS  | 0.780826721 | 0.92 | Y327  | 0.91 |
| IPI00306301.1 | 5160 PDHA1     | R.YHGHS   | 0.373234869 | 0.98 | S338  | 1.06 |
| IPI00306301.1 | 5160 PDHA1     | R.YHGHS*  | 0.353263807 | 1    | S331  | 0.81 |
| IPI00306301.1 | 5160 PDHA1     | R.YHGHS   | 0.726073545 | 1    | S333  | 1    |
| IPI00306369.3 | 54888 NSUN2    | R.AGEPNE  | 0.32093792  | 0.9  | S743  | 1.17 |



|               |              |            |             |            |      |
|---------------|--------------|------------|-------------|------------|------|
| IPI00306369.3 | 54888 NSUN2  | R.AGEPNE   | 0.106353987 | 0.66 S751  | 0.92 |
| IPI00306369.3 | 54888 NSUN2  | R.AGEPNE   | 0.152571688 | 1 S743     | 1.2  |
| IPI00306406.3 | 55781 RIOK2  | R.VQGGVI   | 0.990159288 | 0.86 S442  | 1.18 |
| IPI00306446.1 | 7572 ZNF24   | R.IHS*GEH  | 0.743182508 | 0.76 S274  | 0.8  |
| IPI00306708.3 | 55872 PBK    | K.KSVLCS   | 0.764845588 | 0.98 T24   | 0.96 |
| IPI00306708.3 | 55872 PBK    | K.KSVLCS   | 0.764845588 | 0.98 S23   | 0.96 |
| IPI00306708.3 | 55872 PBK    | K.SVLCST   | 0.431601138 | 0.98 S32   | 1.12 |
| IPI00306708.3 | 55872 PBK    | K.SVLCST   | 0.919312669 | 0.98 T24   | 0.91 |
| IPI00306708.3 | 55872 PBK    | R.GLSHS*   | 0.773594539 | 1 S59      | 0.99 |
| IPI00306778.2 | 4320 MMP11   | R.ADIMIDF  | 0.849082022 | 0.55 Y162  | 0.48 |
| IPI00306840.2 | 81537 SGPP1  | R.RNS*LTG  | 0.401648339 | 0.96 S112  | 1.16 |
| IPI00307545.1 | 7145 TNS1    | R.RAAS*D   | 0.197661257 | 0.94 S899  | 1.1  |
| IPI00307545.1 | 7145 TNS1    | K.SQSVPC   | 0.080258071 | 0.88 S742  | 1.07 |
| IPI00307545.1 | 7145 TNS1    | R.AQFSVA   | 0.096924105 | 0.9 S1177  | 1.28 |
| IPI00307545.1 | 7145 TNS1    | R.NYQSSS   | 0.002042313 | 0.71 T1139 | 0.95 |
| IPI00307545.1 | 7145 TNS1    | R.SYS*PYI  | 0.346340474 | 0.98 S794  | 1.09 |
| IPI00307545.1 | 7145 TNS1    | R.HLGGSC   | 0.684201094 | 0.98 S1314 | 1.11 |
| IPI00307545.1 | 7145 TNS1    | K.SFS*AP/  | 0.829549043 | 0.98 S1048 | 1.03 |
| IPI00307545.1 | 7145 TNS1    | K.S*FSAP/  | 0.919312669 | 0.98 S1046 | 1.03 |
| IPI00307545.1 | 7145 TNS1    | R.T*PTQPI  | 0.431601138 | 0.96 T1105 | 1.11 |
| IPI00307545.1 | 7145 TNS1    | R.SYSPY*I  | 0.32093792  | 1 Y796     | 1.14 |
| IPI00307545.1 | 7145 TNS1    | K.SQS*VP/  | 0.12765804  | 0.98 S733  | 1.23 |
| IPI00307545.1 | 7145 TNS1    | R.WDS*YC   | 0.530774648 | 1 S338     | 1.06 |
| IPI00307545.1 | 7145 TNS1    | K.EATSDP   | 0.152571688 | 0.98 T860  | 1.21 |
| IPI00307545.1 | 7145 TNS1    | K.EATSDP   | 0.152571688 | 0.98 S858  | 1.21 |
| IPI00307545.1 | 7145 TNS1    | K.VATTPG   | 0.373234869 | 1 S1269    | 1.12 |
| IPI00307545.1 | 7145 TNS1    | R.WDS*YC   | 0.088241621 | 0.92 S338  | 1.13 |
| IPI00307545.1 | 7145 TNS1    | K.EAFEEM   | 0.32093792  | 0.94 S963  | 1.06 |
| IPI00307545.1 | 7145 TNS1    | R.SGYIPSI  | 0.32093792  | 0.98 T775  | 0.39 |
| IPI00307545.1 | 7145 TNS1    | R.NYQSSS   | 0.566916624 | 1 S1155    | 1.06 |
| IPI00307545.1 | 7145 TNS1    | R.NYQSSS   | 0.566916624 | 1 S1157    | 1.06 |
| IPI00307545.1 | 7145 TNS1    | R.TVGTNT   | 0.566916624 | 0.98 S1192 | 1.09 |
| IPI00307545.1 | 7145 TNS1    | R.TVGTNT   | 0.566916624 | 0.98 T1189 | 1.09 |
| IPI00307591.5 | 23060 ZNF609 | R.LVEPHS   | 0.8197889   | 0.92 S578  | 1.16 |
| IPI00307591.5 | 23060 ZNF609 | R.LVEPHS   | 0.49616549  | 0.94 S576  | 1.03 |
| IPI00307591.5 | 23060 ZNF609 | R.NCPS*P   | 0.401648339 | 0.94 S491  | 1.15 |
| IPI00307591.5 | 23060 ZNF609 | R.TNS*MG   | 0.431601138 | 0.98 S467  | 1.06 |
| IPI00307659.2 | 57332 CBX8   | R.RQDSDL   | 0.048845949 | 0.67 S265  | 1.05 |
| IPI00307659.2 | 57332 CBX8   | R.RQDS*D   | 1.77E-07    | 0.79 S256  | 0.27 |
| IPI00307733.4 | 29072 SETD2  | K.SWQQT    | 0.912548374 | 0.83 S1228 | 1.12 |
| IPI00307733.4 | 29072 SETD2  | R.AHT*PLI  | 0.834430989 | 0.71 T1853 | 0.64 |
| IPI00307733.4 | 29072 SETD2  | K.IISENS*I | 0.975679369 | 0.86 S1888 | 1.05 |
| IPI00307733.4 | 29072 SETD2  | R.RSS*LS'  | 0.31051834  | 0.66 S2080 | 0.76 |
| IPI00307758.6 | 9600 PITPNM1 | K.ERPQLA   | 0.530774648 | 0.79 S896  | 0.92 |
| IPI00307758.6 | 9600 PITPNM1 | R.RGSMNI   | 0.233505398 | 0.98 S600  | 1.13 |
| IPI00307760.6 | 84524 ZC3H8  | R.SKDYDV   | 0.49616549  | 0.48 S77   | 0.83 |
| IPI00328258.2 | 85403 EAF1   | K.TSPLKD   | 0.166517367 | 0.98 S254  | 1.17 |
| IPI00328258.2 | 85403 EAF1   | K.TS*PLKI  | 0.166517367 | 0.98 S247  | 1.17 |
| IPI00328258.2 | 85403 EAF1   | K.T*SPLKI  | 0.431601138 | 1 T246     | 1.12 |
| IPI00328260.2 | 8439 NSMAF   | K.T*LAWN   | 0.391052876 | 0.9 T611   | 0.74 |
| IPI00328272.2 | 25921 ZDHHC5 | K.S*KGSLI  | 0.49616549  | 0.69 S296  | 1.09 |

|               |        |         |            |             |      |       |      |
|---------------|--------|---------|------------|-------------|------|-------|------|
| IPI00328272.2 | 25921  | ZDHHC5  | R.S*SSLK9  | 0.080258071 | 0.76 | S427  | 1.05 |
| IPI00328272.2 | 25921  | ZDHHC5  | K.SFHFD    | 0.166517367 | 0.98 | S423  | 1.15 |
| IPI00328272.2 | 25921  | ZDHHC5  | K.SLGSAS   | 0.233505398 | 0.98 | S694  | 1.18 |
| IPI00328272.2 | 25921  | ZDHHC5  | K.SLGSAS   | 0.233505398 | 0.98 | S693  | 1.18 |
| IPI00328272.2 | 25921  | ZDHHC5  | K.SFHFD    | 0.072926818 | 0.98 | S425  | 1.24 |
| IPI00328272.2 | 25921  | ZDHHC5  | R.GVGS*P   | 0.373234869 | 1    | S621  | 1.12 |
| IPI00328272.2 | 25921  | ZDHHC5  | R.GDS*LK   | 0.684201094 | 0.98 | S380  | 1.16 |
| IPI00328272.2 | 25921  | ZDHHC5  | R.SEPSLE   | 0.32093792  | 0.98 | S409  | 1.02 |
| IPI00328272.2 | 25921  | ZDHHC5  | R.SEPSLE   | 0.32093792  | 0.98 | T411  | 1.02 |
| IPI00328285.5 | 10868  | USP20   | K.LSSS*PF  | 0.401648339 | 0.92 | S408  | 0.98 |
| IPI00328285.5 | 10868  | USP20   | R.KFS*WC   | 0.463105648 | 1    | S333  | 1.1  |
| IPI00328285.5 | 10868  | USP20   | K.AVPIAV/  | 0           | 0.64 | S132  | 2.14 |
| IPI00328285.5 | 10868  | USP20   | K.AVPIAV/  | 0           | 0.64 | S134  | 2.14 |
| IPI00328306.8 | 9877   | ZC3H11A | R.RLSS*A9  | 0.895911332 | 0.96 | S759  | 0.96 |
| IPI00328306.8 | 9877   | ZC3H11A | R.RLSSAS   | 0.530774648 | 0.96 | S761  | 0.96 |
| IPI00328306.8 | 9877   | ZC3H11A | R.RLSSAS   | 0.373234869 | 0.98 | T762  | 1.02 |
| IPI00328306.8 | 9877   | ZC3H11A | R.RLS*SA9  | 0.373234869 | 0.98 | S758  | 1.02 |
| IPI00328306.8 | 9877   | ZC3H11A | R.RLSSAS   | 0.346340474 | 0.98 | S768  | 1.02 |
| IPI00328306.8 | 9877   | ZC3H11A | R.KFS*AG9  | 0.643675939 | 0.98 | S290  | 1.03 |
| IPI00328306.8 | 9877   | ZC3H11A | R.KFSAG9   | 0.643675939 | 0.98 | S295  | 1.03 |
| IPI00328306.8 | 9877   | ZC3H11A | R.RLS*SA9  | 0.346340474 | 0.85 | S758  | 0.94 |
| IPI00328306.8 | 9877   | ZC3H11A | R.RLS*SA9  | 0.346340474 | 0.85 | S758  | 0.94 |
| IPI00328322.8 | 9013   | TAF1C   | R.DTPGC/   | 0.32093792  | 0.96 | T741  | 1.1  |
| IPI00328342.4 | 9497   | SLC4A7  | K.KHS*DP   | 0.060044376 | 0.69 | S242  | 0.99 |
| IPI00328342.4 | 9497   | SLC4A7  | R.MLQDDI   | 0.530774648 | 0.76 | S1176 | 0.87 |
| IPI00328573.1 | 84971  | ATG4D   | R.AKRPS*9  | 0.015665801 | 0.9  | S467  | 1.07 |
| IPI00328644.4 | 2357   | FPR1    | R.GIIRFIIG | 0.360667889 | 0.88 | S211  | 0.72 |
| IPI00328659.1 | 9070   | ASH2L   | K.ARS*DP   | 0.27446972  | 0.79 | S222  | 0.88 |
| IPI00328798.1 | 283149 | BCL9L   | K.SPQVLC   | 0.84064003  | 0.96 | S987  | 1.07 |
| IPI00328798.1 | 283149 | BCL9L   | K.SPSMAV   | 0.005157186 | 0.58 | S1004 | 1.77 |
| IPI00328798.1 | 283149 | BCL9L   | K.SPSMAV   | 0.181528891 | 0.94 | S1010 | 1.03 |
| IPI00328798.1 | 283149 | BCL9L   | R.GLLS*PF  | 0.181528891 | 0.98 | S750  | 1.19 |
| IPI00328822.1 | 54583  | EGLN1   | K.AKPPAD   | 0.402755896 | 0.52 | S125  | 0.93 |
| IPI00328828.4 | 51742  | ARID4B  | R.KAEFPS   | 0.181528891 | 0.76 | S1031 | 0.87 |
| IPI00328828.4 | 51742  | ARID4B  | R.HFAESE   | 0.976229102 | 0.88 | T133  | 0.98 |
| IPI00328832.3 | 23335  | WDR7    | K.ARGS*P   | 0.004102604 | 1    | S935  | 1.47 |
| IPI00328884.7 | 5866   | RAB3IL1 | R.ELHPQL   | 0.27446972  | 1    | S179  | 1.12 |
| IPI00328911.2 | 25831  | HECTD1  | R.RRT*WC   | 1.13E-05    | 0.72 | T1762 | 1.82 |
| IPI00328911.2 | 25831  | HECTD1  | K.LAPGYD   | 0.751731134 | 0.96 | S1347 | 0.91 |
| IPI00328929.2 | 124245 | NHN1    | K.KLGVS    | 0.01011525  | 0.92 | S534  | 1.18 |
| IPI00328929.2 | 124245 | NHN1    | K.KLGVS*9  | 0.000547756 | 0.94 | S532  | 1.35 |
| IPI00328929.2 | 124245 | NHN1    | K.LGVSVS   | 0.401648339 | 0.98 | S534  | 1.09 |
| IPI00329054.1 | 28962  | OSTM1   | K.RLKSST   | 0.116581414 | 0.83 | T324  | 1.08 |
| IPI00329345.6 | 65244  | SPATS2  | R.SRCS*S   | 0.296993866 | 0.94 | S385  | 1.11 |
| IPI00329345.6 | 65244  | SPATS2  | R.S*RCS*9  | 0.296993866 | 0.94 | S382  | 1.11 |
| IPI00329528.8 | 9730   | VPRBP   | K.EADLPM   | 0.604563646 | 0.94 | S899  | 1.05 |
| IPI00329528.8 | 9730   | VPRBP   | R.HLPS*PI  | 0.088241621 | 0.66 | S1004 | 1.12 |
| IPI00329536.1 | 8411   | EEA1    | R.VLSLET   | 0           | 0.98 | T621  | 0.06 |
| IPI00329547.3 | 23091  | ZC3H13  | R.SASPY    | 0.566916624 | 0.94 | S381  | 1.03 |
| IPI00329547.3 | 23091  | ZC3H13  | R.SASPY    | 0.566916624 | 0.94 | S380  | 1.03 |
| IPI00329547.3 | 23091  | ZC3H13  | R.S*LSPS9  | 0.253322457 | 0.83 | S875  | 1.04 |

|                |                |           |             |      |       |      |
|----------------|----------------|-----------|-------------|------|-------|------|
| IPI00329547.3  | 23091 ZC3H13   | R.SAS*PYI | 0.373234869 | 0.96 | S372  | 1.18 |
| IPI00329547.3  | 23091 ZC3H13   | R.TPS*PPI | 0.463105648 | 0.85 | S265  | 1.05 |
| IPI00329547.3  | 23091 ZC3H13   | R.KTSAVS  | 0.99978897  | 0.96 | S242  | 1.11 |
| IPI00329547.3  | 23091 ZC3H13   | R.SKLS*P  | 0.32093792  | 1    | S207  | 1.07 |
| IPI00329547.3  | 23091 ZC3H13   | R.RS*PER  | 0.214968943 | 0.98 | S77   | 1.16 |
| IPI00329547.3  | 23091 ZC3H13   | R.SKLS*P  | 8.15E-05    | 0.58 | S207  | 0.77 |
| IPI00329547.3  | 23091 ZC3H13   | R.SLS*PSI | 0.604563646 | 1    | S877  | 1.11 |
| IPI00329572.3  | 29763 PACSIN3  | K.EKGRS   | 0.029596689 | 0.58 | S319  | 0.84 |
| IPI00329572.3  | 29763 PACSIN3  | K.GGRSPI  | 0.058272236 | 0.53 | T326  | 0.79 |
| IPI00329572.3  | 29763 PACSIN3  | K.GGRS*P  | 0.116581414 | 0.27 | S319  | 1.06 |
| IPI00329590.4  | 56342 PPAN     | R.LQDISEI | 0.12765804  | 0.83 | S240  | 1.01 |
| IPI00329590.4  | 56342 PPAN     | R.VGGS*D  | 0.463105648 | 1    | S359  | 1.11 |
| IPI00329590.4  | 56342 PPAN     | R.LQDISEI | 0.373234869 | 0.96 | S238  | 1.08 |
| IPI00329590.4  | 56342 PPAN     | R.LQDISEI | 0.197661257 | 0.98 | S238  | 1.26 |
| IPI00329635.3  | 201163 FLCN    | R.AHS*PA  | 0.001001611 | 0.9  | S62   | 1.55 |
| IPI00329638.10 | 51776 ZAK      | K.NFS*SLI | 0.072926818 | 1    | S648  | 1.34 |
| IPI00329638.10 | 51776 ZAK      | R.SQSNPI  | 0.187602579 | 0.86 | S599  | 0.95 |
| IPI00329638.10 | 51776 ZAK      | R.SQS*NP  | 0.32093792  | 0.79 | S593  | 1.21 |
| IPI00329638.10 | 51776 ZAK      | R.SSS*PTC | 0.401648339 | 0.98 | S637  | 1.12 |
| IPI00329638.10 | 51776 ZAK      | R.VSQSAL  | 0.643675939 | 1    | S727  | 1.05 |
| IPI00329650.1  | 129401 NUP35   | K.TLGT*PI | 0.936890791 | 0.71 | T273  | 1    |
| IPI00329650.1  | 129401 NUP35   | R.SIYDDIS | 0.670278613 | 0.88 | S100  | 0.96 |
| IPI00329650.1  | 129401 NUP35   | R.SIYDDIS | 0.670278613 | 0.88 | S100  | 0.96 |
| IPI00329650.1  | 129401 NUP35   | K.ASTSDY  | 0.604563646 | 0.96 | T308  | 1.01 |
| IPI00329748.7  | 54785 C17orf59 | R.RAT*ISS | 0.072926818 | 0.9  | T62   | 1.42 |
| IPI00329753.1  | 51101 C8orf70  | K.GIEGHS  | 0.431601138 | 0.98 | S292  | 1.04 |
| IPI00329787.3  | 91833 WDR20    | R.SNS*LPI | 0.166517367 | 1    | S373  | 1.11 |
| IPI00329787.3  | 91833 WDR20    | R.S*NSLPI | 0.27446972  | 1    | S371  | 1.17 |
| IPI00332155.1  | 114787 GPRIN1  | K.DLEAAG  | 0.786805188 | 0.9  | S776  | 0.96 |
| IPI00332155.1  | 114787 GPRIN1  | K.VGSLPL  | 0.773594539 | 1    | S615  | 0.99 |
| IPI00333215.1  | 6917 TCEA1     | K.KKEPAI  | 0.253322457 | 0.98 | S97   | 1.09 |
| IPI00333215.1  | 6917 TCEA1     | K.KKEPAI  | 0.253322457 | 0.98 | S100  | 1.09 |
| IPI00333215.1  | 6917 TCEA1     | K.KKEPAI  | 0.166517367 | 0.98 | T96   | 1.15 |
| IPI00333541.4  | 2316 FLNA      | K.AFGPGL  | 0.27446972  | 1    | S1084 | 1.11 |
| IPI00333771.1  | 800 CALD1      | K.RGS*IGE | 0.49616549  | 0.96 | S196  | 0.92 |
| IPI00333771.1  | 800 CALD1      | K.RGS*IGE | 0.604563646 | 0.96 | S196  | 1.03 |
| IPI00333771.1  | 800 CALD1      | R.RS*LAAI | 0.805160956 | 0.92 | S12   | 0.73 |
| IPI00333771.1  | 800 CALD1      | K.GNVFSS  | 0.938173728 | 0.98 | T474  | 0.96 |
| IPI00333771.1  | 800 CALD1      | R.AEFLNK  | 0.726073545 | 0.98 | S395  | 1.04 |
| IPI00333771.1  | 800 CALD1      | K.GNVFSS  | 0.604563646 | 1    | S463  | 1.02 |
| IPI00333771.1  | 800 CALD1      | K.GNVFSS  | 0.684201094 | 1    | T469  | 0.96 |
| IPI00333771.1  | 800 CALD1      | K.GNVFSS  | 0.878390339 | 1    | S463  | 0.89 |
| IPI00334400.1  | 8502 PKP4      | K.DGWNQ   | 0.166517367 | 0.98 | T1017 | 1.08 |
| IPI00334400.1  | 8502 PKP4      | K.DGWNQ   | 0.139636808 | 0.98 | S1016 | 1.21 |
| IPI00334400.1  | 8502 PKP4      | R.SAVS*PI | 0.463105648 | 0.96 | S406  | 1.22 |
| IPI00334400.1  | 8502 PKP4      | R.S*AVSPI | 0.463105648 | 0.96 | S403  | 1.22 |
| IPI00334400.1  | 8502 PKP4      | R.LLGLNE  | 0.49616549  | 0.88 | S776  | 1.1  |
| IPI00334400.1  | 8502 PKP4      | R.AAS*PYI | 0.32093792  | 1    | S273  | 1.15 |
| IPI00334410.1  | 399687 MYO18A  | R.RVSS*S  | 0.026666866 | 0.56 | S737  | 0.84 |
| IPI00334410.1  | 399687 MYO18A  | R.RVS*SS  | 0.152571688 | 1    | S736  | 1.26 |
| IPI00334796.4  | 84229 CCDC135  | R.T*EVDS  | 0           | 0.86 | T573  | 0.06 |

|               |               |           |             |            |      |
|---------------|---------------|-----------|-------------|------------|------|
| IPI00334914.2 | 81627 C1orf25 | K.RKS*NE  | 0.152571688 | 1 S612     | 1.2  |
| IPI00335248.1 | 9252 RPS6KA5  | K.LFQGYS  | 0.106353987 | 0.9 S376   | 1.39 |
| IPI00335248.1 | 9252 RPS6KA5  | K.LFQGYS  | 0.463105648 | 0.83 S376  | 1.3  |
| IPI00335766.5 | 2011 MARK2    | R.GRNS*A  | 0.296993866 | 0.94 S7    | 0.99 |
| IPI00335766.5 | 2011 MARK2    | R.SRNS*P  | 0.253322457 | 0.98 S452  | 1.13 |
| IPI00335766.5 | 2011 MARK2    | R.PSADLT  | 0.684201094 | 0.98 S357  | 1.02 |
| IPI00335766.5 | 2011 MARK2    | R.VPVAS*I | 0.373234869 | 1 S481     | 1.09 |
| IPI00335766.5 | 2011 MARK2    | R.DQQNLF  | 0.530774648 | 0.96 S536  | 1.02 |
| IPI00335766.5 | 2011 MARK2    | R.DQQNLF  | 0.463105648 | 0.96 S531  | 1.02 |
| IPI00335766.5 | 2011 MARK2    | R.RFS*DQ  | 0.49616549  | 0.98 S376  | 1.07 |
| IPI00335766.5 | 2011 MARK2    | R.VPVAS*I | 0.346340474 | 1 S481     | 1.11 |
| IPI00335766.5 | 2011 MARK2    | R.VPVASP  | 0.32093792  | 1 S483     | 1.11 |
| IPI00335766.5 | 2011 MARK2    | R.GRNSA1  | 0.253322457 | 1 S10      | 1.15 |
| IPI00335766.5 | 2011 MARK2    | R.LLKT*IG | 0.181528891 | 1 T25      | 1.19 |
| IPI00335766.5 | 2011 MARK2    | K.VPAS*PI | 0.233505398 | 0.98 S422  | 1.12 |
| IPI00335766.5 | 2011 MARK2    | R.RFS*DQ  | 0.197661257 | 1 S376     | 1.17 |
| IPI00335766.5 | 2011 MARK2    | R.S*TFHA  | 0.480507638 | 0.94 S507  | 1.04 |
| IPI00335766.5 | 2011 MARK2    | K.LDT*FC  | 0.604563646 | 0.98 T175  | 1.13 |
| IPI00335849.2 | 9462 RASAL2   | R.SIS*GTS | 0.002296625 | 0.86 S148  | 1.38 |
| IPI00335849.2 | 9462 RASAL2   | R.SISGT*S | 0.233505398 | 0.96 T150  | 1.11 |
| IPI00335849.2 | 9462 RASAL2   | R.S*HESLI | 0.000618432 | 0.79 S219  | 1.44 |
| IPI00336047.5 | 4650 MYO9B    | R.VQEKPE  | 0.756570768 | 0.86 S1294 | 1.33 |
| IPI00336047.5 | 4650 MYO9B    | K.KKPGDA  | 0.12765804  | 0.88 S1405 | 0.89 |
| IPI00336047.5 | 4650 MYO9B    | K.AAGMS   | 0.32093792  | 0.96 S722  | 0.99 |
| IPI00336047.5 | 4650 MYO9B    | K.AAGMS   | 0.32093792  | 0.96 S717  | 0.99 |
| IPI00336047.5 | 4650 MYO9B    | K.AAGMS*  | 0.32093792  | 0.96 S716  | 0.99 |
| IPI00336047.5 | 4650 MYO9B    | R.VQEKPE  | 0.139636808 | 1 T1295    | 1.26 |
| IPI00336047.5 | 4650 MYO9B    | R.VQEKPE  | 0.139636808 | 1 S1290    | 1.26 |
| IPI00336119.4 | 4664 NAB1     | R.RLS*AG  | 0.03637398  | 1 S395     | 1.37 |
| IPI00336159.3 |               | K.RSAS*AI | 0.51496205  | 0.58 S272  | 0.59 |
| IPI00336159.3 |               | R.SAS*AD  | 0.501931941 | 0.74 S272  | 0.81 |
| IPI00337387.3 | 55660 PRPF40A | R.RLS*GS  | 0.000194095 | 0.32 S34   | 0.59 |
| IPI00337532.4 | 85021 REPS1   | K.KGS*VS  | 0.106353987 | 0.98 S91   | 1.25 |
| IPI00337532.4 | 85021 REPS1   | R.SS*SSQ  | 0.726073545 | 0.79 S377  | 1.2  |
| IPI00337532.4 | 85021 REPS1   | R.TSADAC  | 0.166517367 | 0.92 S110  | 1.26 |
| IPI00337532.4 | 85021 REPS1   | R.TSADAC  | 0.166517367 | 0.92 S110  | 1.26 |
| IPI00337532.4 | 85021 REPS1   | R.TGSDHT  | 0.346340474 | 0.98 S430  | 1.14 |
| IPI00337532.4 | 85021 REPS1   | R.RQS*SS  | 0.373234869 | 0.96 S220  | 1.08 |
| IPI00337532.4 | 85021 REPS1   | R.TGSDHT  | 0.431601138 | 0.98 T429  | 1.09 |
| IPI00337532.4 | 85021 REPS1   | R.TGSDHT  | 0.233505398 | 0.98 S437  | 1.2  |
| IPI00337532.4 | 85021 REPS1   | R.TSADAC  | 0.080258071 | 0.98 S118  | 1.18 |
| IPI00337532.4 | 85021 REPS1   | R.TSADAC  | 0.080258071 | 0.98 S118  | 1.18 |
| IPI00337532.4 | 85021 REPS1   | R.TGSDHT  | 0.214968943 | 1 T429     | 1.14 |
| IPI00337532.4 | 85021 REPS1   | R.TGSDHT  | 0.233505398 | 1 S430     | 1.16 |
| IPI00337588.1 | 7159 TP53BP2  | K.RSS*ITE | 1.55E-15    | 0.5 S614   | 2.08 |
| IPI00337662.3 | 10149 GPR64   | K.RGS*LH  | 0.401648339 | 0.9 S959   | 1.18 |
| IPI00337663.4 |               | K.NITDYLI | 0.836096036 | 0.72 S569  | 0.9  |
| IPI00337663.4 |               | R.LRECEL  | 0.27446972  | 0.77 S492  | 0.42 |
| IPI00337663.4 |               | K.NITDYLI | 0.800289022 | 0.55 S579  | 0.79 |
| IPI00337663.4 |               | R.TQLWAS  | 0.49616549  | 1 T543     | 1.04 |
| IPI00337663.4 |               | R.HEL5*PI | 0.214968943 | 1 S74      | 1.19 |

|               |                  |            |             |            |      |
|---------------|------------------|------------|-------------|------------|------|
| IPI00337663.4 |                  | R.ERFS*PI  | 0.088241621 | 1 S67      | 1.26 |
| IPI00337667.1 | 23299 BICD2      | K.KEGLAP   | 0.530774648 | 0.79 S331  | 0.97 |
| IPI00337705.1 | 85439 STON2      | R.ATNPFL   | 0.398836595 | 0.88 S123  | 0.82 |
| IPI00337726.2 | 55904 MLL5       | R.GTMYS    | 0.643675939 | 0.96 S1070 | 1.02 |
| IPI00337726.2 | 55904 MLL5       | R.SRS*PA'  | 0.49616549  | 0.85 S845  | 0.95 |
| IPI00339353.2 | 23365 ARHGEF1    | K.HLSTPS   | 0.296993866 | 0.96 S618  | 0.95 |
| IPI00339394.1 | 22999 RIMS1      | R.RASQS    | 0.139636808 | 1 S1359    | 1.23 |
| IPI00339394.1 | 22999 RIMS1      | R.RAS*QS   | 0.233505398 | 1 S1356    | 1.14 |
| IPI00339394.1 | 22999 RIMS1      | R.RAS*QS   | 0.152571688 | 1 S1356    | 1.18 |
| IPI00339394.1 | 22999 RIMS1      | R.RASQS*   | 0.233505398 | 1 S1358    | 1.18 |
| IPI00373869.4 | 440400 MGC7199   | K.VYEDSC   | 0.27446972  | 0.88 S96   | 1.1  |
| IPI00373869.4 | 440400 MGC7199   | R.KVYEDS   | 0.595623706 | 0.88 S96   | 0.57 |
| IPI00373877.3 | 284695 ZNF326    | K.ISLSKS*  | 0.627992512 | 0.98 S270  | 0.89 |
| IPI00373877.3 | 284695 ZNF326    | K.ISLSKS*  | 0.84419767  | 0.96 S270  | 1.03 |
| IPI00373877.3 | 284695 ZNF326    | K.ISLSKSF  | 0.743182508 | 0.98 T274  | 0.88 |
| IPI00373988.4 | 55219 TMEM57     | K.FVET*SF  | 0.01011525  | 0.88 T420  | 0.78 |
| IPI00374065.3 | 375056 MIA3      | R.WSAEA    | 0.726073545 | 0.92 T1733 | 0.99 |
| IPI00374065.3 | 375056 MIA3      | R.WSAEA    | 0.566916624 | 0.92 S1739 | 0.99 |
| IPI00374065.3 | 375056 MIA3      | R.SFSG*    | 0.002296625 | 0.94 S1706 | 1.11 |
| IPI00374065.3 | 375056 MIA3      | R.WSAEA    | 0.463105648 | 0.96 S1741 | 0.99 |
| IPI00374065.3 | 375056 MIA3      | R.WSAEA    | 0.463105648 | 0.96 S1740 | 0.99 |
| IPI00374336.1 | 199834 LCE4A     | K.SSNCYC   | 0.726073545 | 1 S83      | 1    |
| IPI00374341.1 | 7464 CORO2A      | R.PIFNSM   | 0.166517367 | 0.98 S423  | 1.21 |
| IPI00374770.1 | 4131 MAP1B       | K.VLSPLR   | 0.106353987 | 0.12 S1274 | 0.63 |
| IPI00374770.1 | 4131 MAP1B       | K.TELS*PS  | 0.12765804  | 0.61 S1972 | 1.03 |
| IPI00374770.1 | 4131 MAP1B       | R.KLGDVS   | 0.431601138 | 0.94 S1375 | 1.06 |
| IPI00374770.1 | 4131 MAP1B       | K.VLS*PLF  | 0.804577835 | 0.72 S1270 | 0.83 |
| IPI00374770.1 | 4131 MAP1B       | K.TELSPS   | 0.096924105 | 0.72 S1974 | 1.15 |
| IPI00374770.1 | 4131 MAP1B       | R.KLGDVS   | 0.258192345 | 0.86 T1377 | 0.85 |
| IPI00374770.1 | 4131 MAP1B       | R.TTKS*PS  | 0.004102604 | 0.72 S1789 | 1.08 |
| IPI00374770.1 | 4131 MAP1B       | K.T*ELSPS  | 0.233505398 | 0.94 T1969 | 1.22 |
| IPI00375113.2 | 55619 DOCK10     | R.S*LLRPC  | 0.684201094 | 0.72 S12   | 0.72 |
| IPI00375252.5 |                  | R.SNT*LN   | 0.684201094 | 0.98 T1022 | 1.07 |
| IPI00375252.5 |                  | R.SLS*LGI  | 0.166517367 | 0.94 S997  | 1    |
| IPI00375252.5 |                  | R.S*NTLN   | 0.233505398 | 0.96 S1020 | 1.17 |
| IPI00375333.2 | 6236 RRAD        | K.S*KSCH   | 0.197661257 | 0.96 S299  | 1.36 |
| IPI00375333.2 | 6236 RRAD        | K.SKS*CH   | 0.197661257 | 0.96 S301  | 1.36 |
| IPI00375359.2 | 5981 RFC1        | K.NKPLS*F  | 0.181528891 | 0.94 S156  | 0.97 |
| IPI00375359.2 | 5981 RFC1        | R.IIYDS*D  | 0.530774648 | 0.96 S69   | 0.9  |
| IPI00375494.3 | 5933 RBL1        | R.DMQPLS   | 0.463105648 | 0.08 S640  | 0.25 |
| IPI00375589.1 | 284836 C21orf125 | R.RPPQPL   | 6.25E-10    | 0.96 S33   | 3.66 |
| IPI00375640.1 | 9025 RNF8        | R.KFS*LDE  | 0.214968943 | 0.96 S157  | 1.19 |
| IPI00375756.2 |                  | K.IAIS*PLK | 0.401648339 | 0.96 S310  | 1.11 |
| IPI00375756.2 |                  | K.IAIS*PLK | 0.530774648 | 0.98 S310  | 1.09 |
| IPI00375756.2 |                  | K.IAISPLK  | 0.000698007 | 0.64 S314  | 1.14 |
| IPI00375793.4 | 285190 RGPD4     | K.HSTPSP   | 0.045978168 | 0.86 Y786  | 0.75 |
| IPI00375793.4 | 285190 RGPD4     | K.DSLITP   | 0.829549043 | 0.88 S1479 | 0.99 |
| IPI00375793.4 | 285190 RGPD4     | K.HSTPS*F  | 0.032806498 | 0.96 S782  | 0.72 |
| IPI00375793.4 | 285190 RGPD4     | R.EDALDC   | 0.853966795 | 0.96 S1276 | 0.86 |
| IPI00375793.4 | 285190 RGPD4     | R.LLPVINT  | 0.86862174  | 0.94 S1743 | 0.88 |
| IPI00375793.4 | 285190 RGPD4     | K.AVVS*PI  | 0.831562154 | 1 S1535    | 0.98 |

|               |        |         |            |             |      |       |      |
|---------------|--------|---------|------------|-------------|------|-------|------|
| IPI00375907.7 | 200186 | CRTC2   | R.HGSGPI   | 0.346340474 | 0.96 | S630  | 1    |
| IPI00375907.7 | 200186 | CRTC2   | R.SSHYGC   | 0.029596689 | 0.86 | S70   | 1.04 |
| IPI00375907.7 | 200186 | CRTC2   | R.S*SHYG   | 0.253322457 | 0.83 | S64   | 1.17 |
| IPI00375907.7 | 200186 | CRTC2   | R.SSHYGC   | 0.166517367 | 0.92 | S90   | 1.32 |
| IPI00375907.7 | 200186 | CRTC2   | R.VPLS*PI  | 0.152571688 | 0.96 | S439  | 1.18 |
| IPI00375907.7 | 200186 | CRTC2   | R.SSHYGC   | 0.197661257 | 0.96 | S79   | 1.18 |
| IPI00375907.7 | 200186 | CRTC2   | R.SSHYGC   | 0.197661257 | 0.96 | S70   | 1.18 |
| IPI00375907.7 | 200186 | CRTC2   | R.HGSGPI   | 0.32093792  | 1    | S629  | 1.17 |
| IPI00375915.4 | 55388  | MCM10   | K.ATASGPI  | 0.181528891 | 0.94 | S548  | 1.1  |
| IPI00376215.2 | 5591   | PRKDC   | R.SSFDWL   | 0.447034483 | 0.81 | S2674 | 0.9  |
| IPI00376221.1 | 57669  | EPB41L5 | R.SALPVS   | 0.152571688 | 0.67 | S418  | 0.88 |
| IPI00376221.1 | 57669  | EPB41L5 | R.SALPVS   | 0.27446972  | 0.9  | S436  | 1.02 |
| IPI00376221.1 | 57669  | EPB41L5 | R.SALPVS   | 0.938173728 | 0.94 | S418  | 0.87 |
| IPI00376222.1 | 91746  | YTHDC1  | K.IRLSS*S  | 0           | 0.72 | S119  | 0.23 |
| IPI00376222.1 | 91746  | YTHDC1  | R.GIS*PIVI | 0.32093792  | 0.96 | S308  | 1.11 |
| IPI00376283.1 | 5930   | RBBP6   | K.LEVTEIV  | 0.401648339 | 0.98 | S1145 | 1.03 |
| IPI00376283.1 | 5930   | RBBP6   | K.LGYLVS   | 0.760488858 | 0.88 | S516  | 0.98 |
| IPI00376312.1 | 8881   | CDC16   | K.NIIS*PPA | 0.296993866 | 0.96 | S559  | 1.06 |
| IPI00376404.2 | 2186   | BPTF    | K.LS*PQM   | 0.296993866 | 0.83 | S2370 | 0.7  |
| IPI00376787.4 | 2146   | EZH2    | R.VKESSII  | 0.066203153 | 0.9  | T492  | 1.01 |
| IPI00376787.4 | 2146   | EZH2    | R.LPNNSS   | 0.467835816 | 0.92 | S371  | 0.76 |
| IPI00376787.4 | 2146   | EZH2    | R.LPNNSS   | 4.62E-06    | 0.96 | S371  | 1.91 |
| IPI00376787.4 | 2146   | EZH2    | R.LPNNSS   | 4.62E-06    | 0.96 | S368  | 1.91 |
| IPI00376787.4 | 2146   | EZH2    | R.LPNNSS   | 1.29E-05    | 1    | S368  | 1.99 |
| IPI00376787.4 | 2146   | EZH2    | R.LPNNSS*  | 8.77E-06    | 1    | S367  | 1.99 |
| IPI00376787.4 | 2146   | EZH2    | K.ESSIIAP  | 0.181528891 | 0.98 | T492  | 1.1  |
| IPI00376787.4 | 2146   | EZH2    | R.VKESSII  | 0.296993866 | 1    | T492  | 1.14 |
| IPI00376955.3 | 5128   | PCTK2   | R.RIS*MEI  | 0.096924105 | 0.98 | S137  | 1.26 |
| IPI00376955.3 | 5128   | PCTK2   | K.LQINS*P  | 0.643675939 | 0.58 | S165  | 0.95 |
| IPI00376955.3 | 5128   | PCTK2   | R.RLS*LTL  | 0.233505398 | 0.98 | S9    | 1.14 |
| IPI00376955.3 | 5128   | PCTK2   | K.RLS*LPA  | 0.49616549  | 0.98 | S146  | 1.33 |
| IPI00376955.3 | 5128   | PCTK2   | R.RAS*LSI  | 0.004102604 | 0.98 | S180  | 1.12 |
| IPI00376960.5 | 55147  | RBM23   | R.EKS*PVI  | 2.70E-07    | 0.94 | S133  | 2.09 |
| IPI00377052.1 | 9846   | GAB2    | R.S*SPAEI  | 0.197661257 | 0.94 | S102  | 1.14 |
| IPI00377052.1 | 9846   | GAB2    | R.SS*PAEI  | 0.197661257 | 0.94 | S103  | 1.14 |
| IPI00377152.1 | 9129   | PRPF3   | R.IKWDEC   | 0.27446972  | 0.92 | S618  | 1.02 |
| IPI00377185.2 | 817    | CAMK2D  | K.S*LLKKF  | 0.106353987 | 0.92 | S319  | 1.05 |
| IPI00377244.1 | 8085   | MLL2    | K.KEELGA   | 0.139636808 | 0.94 | S1716 | 1.15 |
| IPI00377244.1 | 8085   | MLL2    | K.KEELGA   | 0.139636808 | 0.94 | S1715 | 1.15 |
| IPI00377244.1 | 8085   | MLL2    | R.ALS*PVI  | 0.181528891 | 0.94 | S4158 | 1.13 |
| IPI00377244.1 | 8085   | MLL2    | K.KEELGA   | 0.726073545 | 0.94 | S1715 | 0.97 |
| IPI00377244.1 | 8085   | MLL2    | K.KEELGA   | 0.726073545 | 0.94 | S1716 | 0.97 |
| IPI00383133.2 |        |         | R.RGSS*T   | 0.401648339 | 0.96 | S1034 | 1.07 |
| IPI00383133.2 |        |         | R.RGS*ST   | 0.401648339 | 0.96 | S1033 | 1.07 |
| IPI00383133.2 |        |         | R.RGSSTE   | 0.858914691 | 0.98 | S1042 | 1.07 |
| IPI00383219.2 | 27125  | AFF4    | R.SSS*PG   | 0.026666866 | 0.88 | S180  | 1.04 |
| IPI00383219.2 | 27125  | AFF4    | R.SS*SPG   | 0.566916624 | 0.94 | S179  | 0.98 |
| IPI00383219.2 | 27125  | AFF4    | K.AVGMP9   | 0.782390145 | 0.9  | S1055 | 0.92 |
| IPI00383219.2 | 27125  | AFF4    | R.SKS*PR   | 0.463105648 | 0.98 | S212  | 0.92 |
| IPI00383219.2 | 27125  | AFF4    | R.S*SSPG   | 0.800118017 | 0.96 | S178  | 0.89 |
| IPI00383219.2 | 27125  | AFF4    | K.EKDLLP   | 0.84419767  | 0.92 | S821  | 0.97 |

|               |                |           |             |      |       |      |
|---------------|----------------|-----------|-------------|------|-------|------|
| IPI00383219.2 | 27125 AFF4     | K.AVGMP9  | 0.73460299  | 0.94 | S1058 | 0.95 |
| IPI00383219.2 | 27125 AFF4     | K.EKDLLP  | 0.684201094 | 0.96 | S814  | 1.02 |
| IPI00383219.2 | 27125 AFF4     | K.AVGMP9  | 0.883273668 | 0.92 | S1058 | 0.86 |
| IPI00383219.2 | 27125 AFF4     | K.NSYNNS  | 0.296993866 | 0.98 | S1043 | 0.83 |
| IPI00383219.2 | 27125 AFF4     | K.EKDLLP  | 0.84419767  | 0    | S814  | 0.01 |
| IPI00383219.2 | 27125 AFF4     | R.S*KSPR  | 0.431601138 | 1    | S210  | 1.07 |
| IPI00383219.2 | 27125 AFF4     | K.YPESNR  | 0.463105648 | 0.88 | T674  | 0.98 |
| IPI00383219.2 | 27125 AFF4     | K.YPESNR  | 0.463105648 | 0.88 | S679  | 0.98 |
| IPI00383219.2 | 27125 AFF4     | K.ELLS*PL | 0.604563646 | 0.98 | S703  | 1.03 |
| IPI00383219.2 | 27125 AFF4     | K.ELLSPL9 | 0.604563646 | 0.98 | S706  | 1.03 |
| IPI00383255.2 | 142678 MIB2    | R.RVSADE  | 0.000888315 | 0.92 | S312  | 1.36 |
| IPI00383303.1 | 2064 ERBB2     | R.PAGAT*  | 0.253322457 | 0.92 | T278  | 1.31 |
| IPI00383303.1 | 2064 ERBB2     | K.GLQSLP  | 0.346340474 | 0.96 | S219  | 1.08 |
| IPI00383303.1 | 2064 ERBB2     | R.YSEDPT  | 0.296993866 | 0.9  | S263  | 0.52 |
| IPI00383303.1 | 2064 ERBB2     | R.FVVIQNI | 0.730331964 | 0.9  | S110  | 1    |
| IPI00383447.1 |                | R.EVSKPV  | 0.197661257 | 0.96 | S329  | 1.08 |
| IPI00383480.2 | 10460 TACC3    | R.LGQPAF  | 0.044561326 | 0.96 | T481  | 1.4  |
| IPI00383480.2 | 10460 TACC3    | K.NTENCC  | 0.961160996 | 0.62 | S25   | 0.83 |
| IPI00383564.1 | 23677 SH3BP4   | R.SYS*LSF | 0.760488858 | 0.92 | S246  | 0.91 |
| IPI00383564.1 | 23677 SH3BP4   | K.VPS*PS/ | 0.790552394 | 0.88 | S42   | 0.93 |
| IPI00383564.1 | 23677 SH3BP4   | K.SDAPTS  | 0.00200812  | 0.76 | S271  | 0.55 |
| IPI00383694.2 |                | K.ELLHSV  | 0.072893529 | 0.92 | S129  | 1.17 |
| IPI00383729.4 | 134353 LSM11   | R.SRS*VP  | 0.007240509 | 0.94 | S280  | 1.22 |
| IPI00383729.4 | 134353 LSM11   | R.S*RSVP  | 0.007240509 | 0.94 | S278  | 1.22 |
| IPI00383794.3 | 64282 PAPD5    | R.AGSSAS  | 0.900575286 | 0.85 | S49   | 0.9  |
| IPI00383794.3 | 64282 PAPD5    | R.AGS*SA  | 0.900575286 | 0.85 | S45   | 0.9  |
| IPI00383849.4 | 5335 PLCG1     | R.ERGS*D  | 0.253322457 | 0.98 | S1234 | 1.12 |
| IPI00383849.4 | 5335 PLCG1     | R.YQQPFE  | 0.040276449 | 0.86 | S1264 | 1.2  |
| IPI00383866.2 |                | R.HS*LNSI | 0.431601138 | 0.85 | S1022 | 0.81 |
| IPI00384154.2 | 10914 PAPOLA   | K.HYGITS' | 0.401648339 | 1    | S24   | 1.1  |
| IPI00384202.3 | 221037 JMJD1C  | K.IKS*SPS | 0.253322457 | 0.9  | S638  | 1    |
| IPI00384202.3 | 221037 JMJD1C  | R.NDCRS*  | 0.197661257 | 0.94 | S1185 | 0.95 |
| IPI00384202.3 | 221037 JMJD1C  | R.NDCRSF  | 0.197661257 | 0.94 | T1187 | 0.95 |
| IPI00384202.3 | 221037 JMJD1C  | K.LTPPES  | 0.883273668 | 0.92 | S2007 | 0.87 |
| IPI00384202.3 | 221037 JMJD1C  | K.ITAHSS* | 0.401648339 | 0.98 | S943  | 0.96 |
| IPI00384202.3 | 221037 JMJD1C  | K.LTPPES' | 0.99978897  | 0.96 | S2005 | 0.91 |
| IPI00384259.1 | 9677 HISPPD2A  | R.TLHS*PF | 0.401648339 | 0.79 | S1127 | 0.99 |
| IPI00384432.3 | 9043 SPAG9     | K.ERPISL  | 0.044561326 | 0.76 | T217  | 0.96 |
| IPI00384432.3 | 9043 SPAG9     | K.YNAPTS  | 0.966676636 | 0.85 | T576  | 0.71 |
| IPI00384432.3 | 9043 SPAG9     | K.LHQLSG  | 0.72279082  | 0.77 | S185  | 0.87 |
| IPI00384432.3 | 9043 SPAG9     | K.LHQLS*( | 0.431601138 | 0.77 | S183  | 0.87 |
| IPI00384432.3 | 9043 SPAG9     | K.YNAPTS  | 0.966676636 | 1    | S578  | 0.95 |
| IPI00384432.3 | 9043 SPAG9     | R.SAS*QS  | 0.116581414 | 0.98 | S720  | 1.08 |
| IPI00384432.3 | 9043 SPAG9     | R.SASQS*  | 0.116581414 | 0.98 | S722  | 1.08 |
| IPI00384432.3 | 9043 SPAG9     | K.ERPIS*L | 0.139636808 | 0.96 | S203  | 0.99 |
| IPI00384432.3 | 9043 SPAG9     | K.ERPIS*L | 0.080258071 | 1    | S203  | 1.24 |
| IPI00384441.1 | 93323 NY-SAR-4 | K.KPEST*9 | 0.985805237 | 0.9  | T130  | 0.98 |
| IPI00384456.4 | 2956 MSH6      | K.IHNVGS' | 0.868109485 | 0.9  | S830  | 1.14 |
| IPI00384456.4 | 2956 MSH6      | R.S*VAPA/ | 0.008098758 | 0.85 | S79   | 1.33 |
| IPI00384456.4 | 2956 MSH6      | R.QSTLYS  | 0.727601611 | 0.9  | S14   | 0.96 |
| IPI00384456.4 | 2956 MSH6      | R.VHVQFF  | 0.197661257 | 0.98 | S137  | 1.16 |

|               |                 |           |             |            |      |
|---------------|-----------------|-----------|-------------|------------|------|
| IPI00384456.4 | 2956 MSH6       | R.VHVQFF  | 0.197661257 | 0.98 T139  | 1.16 |
| IPI00384463.3 | 1981 EIF4G1     | K.REAALP  | 0.006469654 | 0.88 S1144 | 1.31 |
| IPI00384463.3 | 1981 EIF4G1     | R.EAALPP  | 0.088241621 | 1 S1144    | 1.24 |
| IPI00384471.1 | 23774 BRD1      | R.IVEYS*P | 0.401648339 | 0.96 S128  | 1.06 |
| IPI00384495.2 | 4734 NEDD4      | R.LTIFGN  | 0.938173728 | 0.81 S671  | 1.09 |
| IPI00384529.4 | 23242 COBL      | R.PAKLS** | 0.001938901 | 0.72 S1142 | 0.95 |
| IPI00384529.4 | 23242 COBL      | R.LQADPK  | 0.818022374 | 0.98 S815  | 0.95 |
| IPI00384529.4 | 23242 COBL      | K.IDELGNI | 0.604563646 | 0.05 S741  | 0.31 |
| IPI00384562.1 | 5580 PRKCD      | K.ARLS*Y  | 0.346340474 | 0.81 S645  | 1.11 |
| IPI00384562.1 | 5580 PRKCD      | K.ARLSYS  | 0.346340474 | 0.81 S647  | 1.11 |
| IPI00384562.1 | 5580 PRKCD      | R.AS*TFC  | 0.021601024 | 0.88 S506  | 1.22 |
| IPI00384562.1 | 5580 PRKCD      | R.RSDS*A  | 0.152571688 | 0.96 S304  | 1.26 |
| IPI00384562.1 | 5580 PRKCD      | R.RS*DSA  | 0.152571688 | 0.96 S302  | 1.26 |
| IPI00384562.1 | 5580 PRKCD      | R.AST*FC  | 0.373234869 | 1 T507     | 1.07 |
| IPI00384714.1 | 55671 SMEK1     | K.TNLSGR  | 0.233505398 | 1 S728     | 1.13 |
| IPI00384714.1 | 55671 SMEK1     | K.DPSVDI  | 0.878390339 | 0.86 S117  | 0.79 |
| IPI00384857.1 | 51155 HN1       | K.GEGDIH  | 0.401648339 | 0.96 S85   | 1.08 |
| IPI00384857.1 | 51155 HN1       | K.MASNIF  | 0.541395815 | 0.9 T8     | 1.06 |
| IPI00384857.1 | 51155 HN1       | R.RNS*SE  | 0.181528891 | 0.96 S41   | 1.29 |
| IPI00384857.1 | 51155 HN1       | R.RNSS*E  | 0.181528891 | 0.96 S88   | 1.29 |
| IPI00384861.3 | 28964 GIT1      | R.KGVSA   | 0.166517367 | 0.92 S335  | 1.28 |
| IPI00384861.3 | 28964 GIT1      | R.KGVSAE  | 0.373234869 | 0.67 S571  | 0.98 |
| IPI00384861.3 | 28964 GIT1      | R.LQPFHS  | 0.566916624 | 0.88 S310  | 1    |
| IPI00384861.3 | 28964 GIT1      | K.SLSS*P  | 0.530774648 | 0.88 S136  | 1.32 |
| IPI00384861.3 | 28964 GIT1      | R.HGS*GA  | 0.995403769 | 0.88 S592  | 1.06 |
| IPI00384909.2 | 57498 KIDINS22  | R.ETSQVII | 0.296993866 | 0.96 S1619 | 0.99 |
| IPI00384909.2 | 57498 KIDINS22  | R.S*SPHS  | 0.9949766   | 0.98 S1311 | 0.91 |
| IPI00384972.3 | 284058 KIAA1267 | R.RTFPLA  | 0.049260986 | 0.9 S1045  | 1.15 |
| IPI00384972.3 | 284058 KIAA1267 | K.LEGKKS  | 0.49616549  | 0.88 S276  | 0.92 |
| IPI00384972.3 | 284058 KIAA1267 | R.S*PISPE | 0.373234869 | 0.98 S991  | 1.12 |
| IPI00384972.3 | 284058 KIAA1267 | K.LEGKKS  | 0.726073545 | 0.98 S280  | 1    |
| IPI00384972.3 | 284058 KIAA1267 | K.LEGKKS  | 0.726073545 | 0.98 S272  | 1    |
| IPI00384972.3 | 284058 KIAA1267 | K.KS*PLSE | 0.27446972  | 0.96 S268  | 1.06 |
| IPI00384972.3 | 284058 KIAA1267 | R.LS*PGTI | 0.656107164 | 0.96 S249  | 1.04 |
| IPI00384972.3 | 284058 KIAA1267 | K.LEGKKS  | 0.726073545 | 0.98 S268  | 1.04 |
| IPI00385083.2 | 91624 NEXN      | K.TIS*QEF | 0.872720802 | 0.96 S301  | 0.97 |
| IPI00385215.1 | 4776 NFATC4     | R.RTSS*E  | 0.684201094 | 0.98 S335  | 1.15 |
| IPI00385215.1 | 4776 NFATC4     | R.RTS*SE  | 0.530774648 | 0.98 S334  | 1.08 |
| IPI00385215.1 | 4776 NFATC4     | R.RYS*SS  | 0.181528891 | 1 S272     | 1.11 |
| IPI00385312.3 | 10276 NET1      | R.GS*SFTI | 0.604563646 | 0.86 S50   | 0.88 |
| IPI00385312.3 | 10276 NET1      | R.GSS*FTI | 0.604563646 | 0.86 S51   | 0.88 |
| IPI00385325.2 | 2060 EPS15      | R.FHDTSS  | 0.197661257 | 0.85 S108  | 1    |
| IPI00385325.2 | 2060 EPS15      | R.SINKLDS | 0.253322457 | 0.96 S662  | 1.17 |
| IPI00385325.2 | 2060 EPS15      | K.LNDPFQ  | 0.769214181 | 0.96 S680  | 0.9  |
| IPI00385383.2 | 10057 ABCC5     | K.NATLAW  | 0.373234869 | 0.85 S509  | 0.88 |
| IPI00385426.1 | 29801 ZDHHC8    | R.LGPATG  | 0.872720802 | 0.94 S743  | 0.93 |
| IPI00385426.1 | 29801 ZDHHC8    | R.SLDFVS  | 0.49616549  | 0.58 S417  | 0.86 |
| IPI00385455.2 | 7005 TEAD3      | K.FSPPS*F | 0.214968943 | 0.98 S148  | 1.13 |
| IPI00385652.1 | 11011 TLK2      | R.S*SPQH  | 0.000618432 | 0.66 S110  | 1.33 |
| IPI00385652.1 | 11011 TLK2      | R.SS*PQH  | 0.000618432 | 0.66 S111  | 1.33 |
| IPI00385896.1 | 6696 SPP1       | K.QLYNKY  | 0           | 0.5 S62    | 3.51 |



|               |               |           |             |            |      |
|---------------|---------------|-----------|-------------|------------|------|
| IPI00385995.1 | 51422 PRKAG2  | R.FFS*RS' | 0           | 0.62 S151  | 7.36 |
| IPI00386072.3 | 85365 ALG2    | K.FS*PEAF | 0           | 0.52 S399  | 0.04 |
| IPI00386115.2 | 26505 CNNM3   | K.FENGAF  | 0.373234869 | 0.83 S547  | 1.01 |
| IPI00386120.1 | 7536 SF1      | K.YACGLV  | 0.373234869 | 0.94 S463  | 0.99 |
| IPI00386128.1 |               | K.VNFPEN  | 0.530774648 | 0.98 S178  | 1.04 |
| IPI00386170.1 | 6744 SSFA2    | K.KKES*S' | 0.277173616 | 0.53 S352  | 1.02 |
| IPI00386170.1 | 6744 SSFA2    | K.KKESSS  | 0.277173616 | 0.53 S354  | 1.02 |
| IPI00386170.1 | 6744 SSFA2    | K.TLS*KLN | 0.431601138 | 0.98 S300  | 1.11 |
| IPI00386170.1 | 6744 SSFA2    | K.SVHIST* | 0.49616549  | 0.88 T442  | 1.01 |
| IPI00386170.1 | 6744 SSFA2    | R.SQS*LP' | 0.197661257 | 0.96 S739  | 1.17 |
| IPI00386194.2 | 223082 ZNRF2  | R.SRS*LG' | 0.320930141 | 0.96 S82   | 0.93 |
| IPI00386194.2 | 223082 ZNRF2  | R.S*RSLG' | 0.320930141 | 0.96 S80   | 0.93 |
| IPI00386194.2 | 223082 ZNRF2  | R.AYSGS*  | 0.689280356 | 0.94 S21   | 0.92 |
| IPI00386211.3 | 259282 FAM44A | R.GLEGN'  | 0.764845588 | 0.98 S2501 | 1.13 |
| IPI00386228.3 | 57606 SLAIN2  | R.LS*LQGI | 0.431601138 | 1 S61      | 1.05 |
| IPI00386349.1 | 81839 VANGL1  | R.NKDGR'  | 0.684201094 | 0.96 S42   | 1.13 |
| IPI00386403.1 | 8661 EIF3S10  | R.RLGDS'  | 0.49616549  | 0.98 S882  | 1.1  |
| IPI00386403.1 | 8661 EIF3S10  | R.RLGDS'  | 0.49616549  | 0.98 S884  | 1.1  |
| IPI00386403.1 | 8661 EIF3S10  | K.AREES*' | 0.501931941 | 0.79 S1188 | 0.73 |
| IPI00386491.4 |               | K.S*PQPP' | 0.346340474 | 0.88 S252  | 0.93 |
| IPI00386491.4 |               | K.SS*GPT' | 0.726073545 | 0.98 S188  | 1    |
| IPI00386491.4 |               | R.LQAALD  | 0.214968943 | 0.96 S59   | 1.11 |
| IPI00386491.4 |               | R.AKSPQF  | 0.604563646 | 0.26 T273  | 0.5  |
| IPI00386491.4 |               | R.AKSPQF  | 0.643675939 | 0.29 T267  | 0.55 |
| IPI00386491.4 |               | R.AKS*PQ  | 0.566916624 | 0.72 S252  | 0.73 |
| IPI00386569.2 | 23170 TTLL12  | R.S*SPGQ  | 0.116581414 | 0.86 S15   | 1.03 |
| IPI00386569.2 | 23170 TTLL12  | R.SSPGQ'  | 0.116581414 | 0.94 T20   | 1.29 |
| IPI00386606.5 | 54542 RC3H2   | K.IGS*PPK | 0.233505398 | 0.9 S420   | 0.79 |
| IPI00386760.2 | 55706 TMEM48  | K.KLNS*PE | 0.373234869 | 0.92 S406  | 1.05 |
| IPI00386760.2 | 55706 TMEM48  | K.KLNSPE  | 0.181528891 | 0.83 T414  | 0.88 |
| IPI00386803.4 | 3927 LASP1    | R.MGPSG'  | 0.566916624 | 0.85 S146  | 1.13 |
| IPI00386961.2 | 55233 MOBK1B  | K.HAEAT*I | 0.296993866 | 0.92 T35   | 1.08 |
| IPI00387130.1 | 57019 CIAPIN1 | K.KS*SPS' | 0.233505398 | 0.94 S182  | 1.1  |
| IPI00387130.1 | 57019 CIAPIN1 | K.KSS*PS' | 0.233505398 | 0.94 S183  | 1.1  |
| IPI00394668.1 | 103 ADAR      | R.TMLLLS  | 0.152571688 | 0.98 S868  | 0.86 |
| IPI00394668.1 | 103 ADAR      | K.S*PVTTL | 0.804577835 | 0.98 S657  | 0.95 |
| IPI00394668.1 | 103 ADAR      | K.TAESQT  | 0.795419436 | 0.98 T644  | 0.92 |
| IPI00394668.1 | 103 ADAR      | K.TAESQT  | 0.966004444 | 1 T644     | 0.92 |
| IPI00394668.1 | 103 ADAR      | K.TAESQT  | 0.379516392 | 0.98 T644  | 0.94 |
| IPI00394679.3 | 7469 WHSC2    | R.EASRPF  | 0.373234869 | 0.98 S371  | 1.07 |
| IPI00394679.3 | 7469 WHSC2    | R.EASRPF  | 0.27446972  | 0.98 S374  | 1.07 |
| IPI00394679.3 | 7469 WHSC2    | R.EASRPF  | 0.233505398 | 1 T376     | 1.06 |
| IPI00394697.2 |               | R.AASVAA  | 0.346340474 | 0.98 S107  | 1.05 |
| IPI00394698.2 | 28987 NOB1    | R.KDDS*D  | 0.181528891 | 0.98 S184  | 1.15 |
| IPI00394698.2 | 28987 NOB1    | R.NPLPNII | 0.32093792  | 0.94 S167  | 0.97 |
| IPI00394737.1 | 114882 OSBPL8 | K.DLHQPS  | 0.116581414 | 0.19 S53   | 0.76 |
| IPI00394737.1 | 114882 OSBPL8 | K.DLHQPS  | 0.777986561 | 0.92 S50   | 0.96 |
| IPI00394737.1 | 114882 OSBPL8 | K.DLHQPS  | 0.049260986 | 0.96 S50   | 1.17 |
| IPI00394781.3 | 9854 TMEM24   | R.SSSCGI  | 0.03637398  | 0.76 S374  | 0.94 |
| IPI00394781.3 | 9854 TMEM24   | K.EAGLSC  | 0.029596689 | 0.96 S663  | 1.16 |
| IPI00394829.2 | 286077 FAM83H | R.HGS*DP  | 0.054409842 | 0.85 S523  | 1.1  |

|               |                |           |             |           |      |
|---------------|----------------|-----------|-------------|-----------|------|
| IPI00394829.2 | 286077 FAM83H  | R.KGS*PT  | 0.463105648 | 1 S881    | 1.02 |
| IPI00394829.2 | 286077 FAM83H  | R.RGS*PT  | 0.566916624 | 0.98 S892 | 1.03 |
| IPI00395337.1 | 81608 FIP1L1   | R.ERDHS*  | 0.197661257 | 0.96 S492 | 1.27 |
| IPI00395337.1 | 81608 FIP1L1   | K.AEFTS*F | 0.373234869 | 0.88 S259 | 0.98 |
| IPI00395347.1 | 113251 LARP4   | R.SNVVSF  | 0.431601138 | 0.67 S660 | 0.88 |
| IPI00395347.1 | 113251 LARP4   | K.DGLNQT  | 0.166517367 | 0.92 T588 | 1.14 |
| IPI00395347.1 | 113251 LARP4   | K.EQYVPF  | 0.373234869 | 0.14 S722 | 0.61 |
| IPI00395347.1 | 113251 LARP4   | K.DGLNQT  | 0.604563646 | 0.98 S583 | 0.99 |
| IPI00395347.1 | 113251 LARP4   | K.DGLNQT  | 0.604563646 | 0.98 S583 | 0.99 |
| IPI00395347.1 | 113251 LARP4   | K.DGLNQT  | 0.604563646 | 0.98 S583 | 0.99 |
| IPI00395347.1 | 113251 LARP4   | K.DGLNQT  | 0.401648339 | 1 T587    | 1.09 |
| IPI00395347.1 | 113251 LARP4   | R.SNVVSF  | 0.431601138 | 0.09 T649 | 0.16 |
| IPI00395347.1 | 113251 LARP4   | K.DGLNQT  | 0.431601138 | 1 T578    | 1.07 |
| IPI00395347.1 | 113251 LARP4   | K.DGLNQT  | 0.32093792  | 1 S583    | 1.07 |
| IPI00395383.1 | 117177 RAB3IP  | R.LRS*PS\ | 0.643675939 | 0.94 S147 | 1.18 |
| IPI00395383.1 | 117177 RAB3IP  | R.NKS*TS\ | 0.080258071 | 0.96 S272 | 1.24 |
| IPI00395444.6 | 157922 CAMSAP1 | K.S*SRPP\ | 0.014056191 | 0.79 S357 | 1.25 |
| IPI00395444.6 | 157922 CAMSAP1 | K.S*PNSH  | 0.080258071 | 0.94 S722 | 1.11 |
| IPI00395467.2 | 153090 DAB2IP  | K.ERNS*Y  | 0.106353987 | 0.67 S165 | 1.16 |
| IPI00395474.1 | 90378 SAMD1    | R.AAAAAA  | 0.873506301 | 0.96 S161 | 0.99 |
| IPI00395554.4 | 116113 FOXP4   | R.RDSSS*  | 0.530774648 | 0.92 S293 | 1.19 |
| IPI00395554.4 | 116113 FOXP4   | R.RDSSSF  | 0.530774648 | 0.92 S300 | 1.19 |
| IPI00395554.4 | 116113 FOXP4   | R.SS*DKF\ | 0.060044376 | 0.98 S443 | 1.31 |
| IPI00395554.4 | 116113 FOXP4   | R.SSDKFC  | 0.27446972  | 0.76 S448 | 1.2  |
| IPI00395554.4 | 116113 FOXP4   | R.S*SDKF\ | 0.401648339 | 0.96 S442 | 1.11 |
| IPI00395568.1 | 84295 PHF6     | K.TAHNSE  | 0.684201094 | 0.88 S156 | 0.84 |
| IPI00395568.1 | 84295 PHF6     | K.TAHNSE  | 0.166517367 | 0.96 S155 | 1.15 |
| IPI00395568.1 | 84295 PHF6     | K.TAHNSE  | 0.373234869 | 0.94 S145 | 1.07 |
| IPI00395568.1 | 84295 PHF6     | K.TAHNSE  | 0.002042313 | 0.94 S154 | 1.07 |
| IPI00395568.1 | 84295 PHF6     | K.TAHNSE  | 0.015665801 | 0.96 S155 | 1.02 |
| IPI00395615.3 | 57596 BEGAIN   | R.RPS*VD  | 0.072926818 | 0.59 S246 | 0.71 |
| IPI00395615.3 | 57596 BEGAIN   | R.DRRPS*  | 0.253322457 | 1 S246    | 1.17 |
| IPI00395625.1 | 10454 MAP3K7IP | R.RSLLQS  | 0.166517367 | 0.66 S11  | 1.39 |
| IPI00395625.1 | 10454 MAP3K7IP | R.S*LLQS\ | 0.116581414 | 0.98 S7   | 1.21 |
| IPI00395631.3 | 84231 TRAF7    | R.T*PSSS\ | 0.197968259 | 0.74 T59  | 0.5  |
| IPI00395631.3 | 84231 TRAF7    | R.TPS*SS\ | 0.197968259 | 0.74 S61  | 0.5  |
| IPI00395663.4 | 23294 ANKS1A   | K.S*PSFA\ | 0.060044376 | 0.92 S661 | 1.14 |
| IPI00395663.4 | 23294 ANKS1A   | K.SPS*FA\ | 0.060044376 | 0.92 S663 | 1.14 |
| IPI00395663.4 | 23294 ANKS1A   | K.EVDKT*F | 0.32093792  | 0.86 T318 | 1.05 |
| IPI00395737.3 | 7798 LUZP1     | K.LVNTTIT | 0.604563646 | 0.96 S690 | 1    |
| IPI00395737.3 | 7798 LUZP1     | R.TFSDTT  | 0.054409842 | 0.56 T515 | 0.91 |
| IPI00395737.3 | 7798 LUZP1     | R.T*FSDT\ | 0.346340474 | 0.18 T510 | 0.64 |
| IPI00395737.3 | 7798 LUZP1     | R.TFS*DT\ | 0.346340474 | 0.98 S512 | 1.16 |
| IPI00395737.3 | 7798 LUZP1     | R.TFSDT*F | 0.346340474 | 0.98 T514 | 1.16 |
| IPI00395737.3 | 7798 LUZP1     | R.EKPDS*  | 0.49616549  | 1 S659    | 1.09 |
| IPI00395813.1 | 57592 ZNF687   | R.KAVVLP  | 0.643675939 | 0.98 S433 | 0.99 |
| IPI00395813.1 | 57592 ZNF687   | K.ATDIPAS | 0.530774648 | 0.98 S253 | 1.03 |
| IPI00395823.3 | 84181 CHD6     | K.VLNHS*F | 0.961160996 | 0.92 S21  | 0.98 |
| IPI00395950.1 | 30850 CDR2L    | R.T*IHTFP | 0.8197889   | 0.94 T154 | 0.99 |
| IPI00395950.1 | 30850 CDR2L    | R.TIHT*FP | 0.214968943 | 0.98 T157 | 1.19 |
| IPI00395950.1 | 30850 CDR2L    | R.LHSS*SI | 0.12765804  | 0.98 S179 | 1.25 |

|               |        |          |           |             |      |       |      |
|---------------|--------|----------|-----------|-------------|------|-------|------|
| IPI00395950.1 | 30850  | CDR2L    | R.LHS*SSI | 0.12765804  | 0.98 | S178  | 1.25 |
| IPI00396048.4 | 60684  | FLJ12716 | K.RT*SYE\ | 0.214968943 | 0.98 | T70   | 1.15 |
| IPI00396051.2 | 23371  | TENC1    | R.S*PVPT  | 0.096924105 | 0.92 | S879  | 1.13 |
| IPI00396057.1 | 23196  | FAM120A  | R.SSPINP/ | 0.017448313 | 0.98 | S442  | 1.39 |
| IPI00396057.1 | 23196  | FAM120A  | K.NQAAIQ  | 0.501931941 | 0.88 | S1023 | 1.06 |
| IPI00396057.1 | 23196  | FAM120A  | K.NLTEQN  | 0.096924105 | 0.92 | T428  | 1.17 |
| IPI00396063.4 | 10260  | DENND4A  | R.HKS*DN  | 0.27446972  | 0.53 | S1058 | 0.86 |
| IPI00396063.4 | 10260  | DENND4A  | R.LWS*SP  | 0.080258071 | 0.94 | S1324 | 1.13 |
| IPI00396063.4 | 10260  | DENND4A  | R.MNS*SF  | 0.296993866 | 0.98 | S1194 | 1.35 |
| IPI00396063.4 | 10260  | DENND4A  | K.SSPS*TE | 0.010658547 | 0.9  | S1554 | 0.68 |
| IPI00396098.1 | 168850 | ZNF800   | R.RDS*ITF | 0.242972405 | 0.85 | S317  | 0.83 |
| IPI00396098.1 | 168850 | ZNF800   | K.VKVEPA  | 0.9240167   | 0.96 | T424  | 0.97 |
| IPI00396098.1 | 168850 | ZNF800   | K.VKVEPA  | 0.873506301 | 0.92 | S422  | 0.84 |
| IPI00396098.1 | 168850 | ZNF800   | K.VKVEPA  | 0.975679369 | 0.92 | S426  | 0.84 |
| IPI00396098.1 | 168850 | ZNF800   | R.DSITPDI | 0.373234869 | 0.98 | S336  | 1.12 |
| IPI00396098.1 | 168850 | ZNF800   | R.DSITPDI | 0.373234869 | 0.98 | S334  | 1.12 |
| IPI00396098.1 | 168850 | ZNF800   | R.DSITPDI | 0.32093792  | 1    | S336  | 1.08 |
| IPI00396171.3 | 4134   | MAP4     | K.KVDLT*L | 0.604563646 | 0.81 | T266  | 0.9  |
| IPI00396171.3 | 4134   | MAP4     | K.TTTAA'  | 0.990159288 | 0.94 | S560  | 0.92 |
| IPI00396171.3 | 4134   | MAP4     | R.AS*PIKM | 0.32093792  | 1    | S358  | 0.99 |
| IPI00396171.3 | 4134   | MAP4     | K.ETERAS  | 0.346340474 | 0.98 | S358  | 1.04 |
| IPI00396171.3 | 4134   | MAP4     | K.VGS*LDI | 0.044561326 | 0.98 | S808  | 1.12 |
| IPI00396171.3 | 4134   | MAP4     | K.KCS*LP/ | 0.12765804  | 0.92 | S636  | 1.12 |
| IPI00396171.3 | 4134   | MAP4     | K.KKPCSE  | 0.49616549  | 0.96 | T101  | 1.08 |
| IPI00396171.3 | 4134   | MAP4     | K.GISEDSI | 0.214968943 | 0.85 | S624  | 1.16 |
| IPI00396171.3 | 4134   | MAP4     | K.GISEDSI | 0.214968943 | 0.85 | T627  | 1.16 |
| IPI00396171.3 | 4134   | MAP4     | K.DMES*P  | 0.139636808 | 0.85 | S280  | 0.99 |
| IPI00396230.2 | 84930  | MASTL    | R.DINMMC  | 1.29E-05    | 0.72 | T194  | 0.99 |
| IPI00396230.2 | 84930  | MASTL    | K.DLELAL' | 0.253322457 | 1    | S370  | 1.09 |
| IPI00396230.2 | 84930  | MASTL    | R.LATSSA  | 0.147475653 | 0.96 | S319  | 0.83 |
| IPI00396265.1 | 1998   | ELF2     | R.VVNITS* | 0.530774648 | 0.92 | S303  | 1.1  |
| IPI00396265.1 | 1998   | ELF2     | R.VVNITS* | 0.49616549  | 0.88 | S303  | 0.97 |
| IPI00396265.1 | 1998   | ELF2     | K.TIEAAE/ | 0.660822982 | 0.55 | S47   | 0.51 |
| IPI00396285.5 |        |          | R.LS*PTFF | 0.296993866 | 0.83 | S258  | 1.09 |
| IPI00396352.4 | 553158 | LOC55315 | R.SKSYNT  | 0.214968943 | 0.96 | T257  | 1.13 |
| IPI00396352.4 | 553158 | LOC55315 | R.SKS*YN' | 0.214968943 | 0.96 | S254  | 1.13 |
| IPI00396352.4 | 553158 | LOC55315 | R.S*KSYN' | 0.214968943 | 0.96 | S252  | 1.13 |
| IPI00396387.3 | 2794   | GNL1     | R.REEQTE  | 0.166517367 | 0.81 | T50   | 1.25 |
| IPI00396387.3 | 2794   | GNL1     | R.EEQTDI  | 2.43E-06    | 0.79 | S51   | 0.89 |
| IPI00396399.4 | 7041   | TGFB111  | R.RGS*LC  | 0.346340474 | 0.96 | S386  | 0.85 |
| IPI00396412.2 | 6733   | SRPK2    | R.HKIPES\ | 0.49616549  | 0.77 | S495  | 0.98 |
| IPI00396412.2 | 6733   | SRPK2    | R.HKIPES\ | 0.643675939 | 0.88 | S494  | 1.17 |
| IPI00396435.2 | 1665   | DHX15    | R.HRLDLG  | 0.430690939 | 0.69 | S15   | 0.77 |
| IPI00396551.3 | 10635  | RAD51AP' | R.SSSSPL  | 0.401648339 | 0.98 | S310  | 1.05 |
| IPI00396551.3 | 10635  | RAD51AP' | R.SSSSPL  | 0.401648339 | 0.98 | S314  | 1.05 |
| IPI00396551.3 | 10635  | RAD51AP' | R.KPLEIRE | 0.726073545 | 0.81 | S282  | 0.87 |
| IPI00396557.3 | 7791   | ZYX      | R.EKVSS*I | 0.643675939 | 0.4  | S143  | 0.7  |
| IPI00396557.3 | 7791   | ZYX      | K.FT*PVA\ | 0.872720802 | 1    | T274  | 0.97 |
| IPI00396557.3 | 7791   | ZYX      | K.LGHPEA  | 0.152571688 | 0.98 | S308  | 1.06 |
| IPI00396557.3 | 7791   | ZYX      | K.FS*PGAI | 0.863507405 | 1    | S281  | 1.02 |
| IPI00396557.3 | 7791   | ZYX      | R.S*PGAP  | 0.49616549  | 1    | S344  | 1.09 |

|               |                |           |             |      |       |      |
|---------------|----------------|-----------|-------------|------|-------|------|
| IPI00396561.3 | 84859 LRCH3    | R.ISHEGS  | 0.331526627 | 0.69 | S419  | 0.83 |
| IPI00396634.2 | 85379 CTA-221G | R.TFQARF  | 0.604563646 | 0.98 | S508  | 1.03 |
| IPI00396634.2 | 85379 CTA-221G | R.RS*PTVI | 0.054409842 | 0.94 | S1224 | 1.07 |
| IPI00396937.1 | 51535 PPHLN1   | K.S*FYSSI | 6.68E-07    | 0.5  | S110  | 0.95 |
| IPI00396937.1 | 51535 PPHLN1   | R.Y*FT*LK | 0.000297256 | 0.96 | Y155  | 1.71 |
| IPI00396937.1 | 51535 PPHLN1   | R.DNTFFR  | 0.751811379 | 1    | S85   | 0.96 |
| IPI00397015.2 | 27245 AHDC1    | R.ASTVS*I | 0.106353987 | 0.55 | S1064 | 1.16 |
| IPI00397015.2 | 27245 AHDC1    | R.GPAAA   | 0.166517367 | 0.98 | S1549 | 1.05 |
| IPI00397376.1 | 79882 ZC3H14   | R.TGS*ISS | 0.642010044 | 0.94 | S327  | 1    |
| IPI00397376.1 | 79882 ZC3H14   | R.T*GSISS | 0.938173728 | 0.94 | T325  | 1    |
| IPI00397376.1 | 79882 ZC3H14   | R.KLPVVS  | 0.872720802 | 0.92 | S301  | 0.91 |
| IPI00397376.1 | 79882 ZC3H14   | R.LCEPEV  | 0.49616549  | 0.76 | S274  | 1.1  |
| IPI00397376.1 | 79882 ZC3H14   | K.NGDEC   | 0.684201094 | 1    | S620  | 1.01 |
| IPI00397376.1 | 79882 ZC3H14   | K.FIVTLDC | 0.827038504 | 0.98 | Y531  | 0.98 |
| IPI00397376.1 | 79882 ZC3H14   | R.DLVQPC  | 0.684201094 | 1    | S515  | 1    |
| IPI00397519.3 | 9685 CLINT1    | K.TIDLGA  | 0.643675939 | 0.98 | S281  | 0.98 |
| IPI00397519.3 | 9685 CLINT1    | K.TIDLGA  | 0.005679537 | 0.81 | S281  | 0.71 |
| IPI00397519.3 | 9685 CLINT1    | K.TIDLGA  | 0.026216849 | 0.92 | T276  | 0.78 |
| IPI00397576.4 | 10489 LRRC41   | K.RSPS*AI | 0.116581414 | 0.98 | S359  | 1.13 |
| IPI00397576.4 | 10489 LRRC41   | K.RS*PSAI | 0.026666866 | 0.98 | S357  | 1.13 |
| IPI00397576.4 | 10489 LRRC41   | R.APS*RD  | 0.049260986 | 0.96 | S276  | 1.27 |
| IPI00397590.1 | 65125 WNK1     | K.DRPVS*  | 0.373234869 | 0.81 | S167  | 0.92 |
| IPI00397590.1 | 65125 WNK1     | R.DVDDG   | 0.072926818 | 0.76 | S1786 | 0.74 |
| IPI00397590.1 | 65125 WNK1     | K.EKPELS  | 0.296993866 | 0.96 | S1766 | 1    |
| IPI00397590.1 | 65125 WNK1     | K.KEKPEL  | 0.296993866 | 0.94 | S1765 | 1.08 |
| IPI00397590.1 | 65125 WNK1     | K.KEKPEL  | 0.139636808 | 0.94 | S1766 | 1.08 |
| IPI00397590.1 | 65125 WNK1     | K.VFPSEIT | 0.003656496 | 0.67 | S1049 | 0.84 |
| IPI00397728.3 | 4659 PPP1R12A  | R.RLAST*  | 1.99E-09    | 0.79 | T508  | 1.14 |
| IPI00397728.3 | 4659 PPP1R12A  | K.FPTTATI | 0.530774648 | 0.98 | S422  | 1.05 |
| IPI00397728.3 | 4659 PPP1R12A  | K.FPTTATI | 0.530774648 | 0.98 | T419  | 1.05 |
| IPI00397734.4 |                | R.IHT*GEK | 0.431601138 | 0.94 | T382  | 1.1  |
| IPI00397734.4 |                | R.VHS*GE  | 0.154098617 | 0.76 | S298  | 0.59 |
| IPI00397794.4 | 57466 SFRS15   | K.KPENEV  | 0.401648339 | 0.98 | S656  | 1.07 |
| IPI00397883.5 |                | K.KKSMEE  | 0.152571688 | 0.92 | T41   | 1.14 |
| IPI00397883.5 |                | K.KKSMEE  | 0.139636808 | 0.94 | T46   | 1.32 |
| IPI00397883.5 |                | K.KKS*ME  | 0.139636808 | 0.94 | S36   | 1.32 |
| IPI00397904.5 | 9688 NUP93     | R.GLDIS*F | 0.088241621 | 0.69 | S72   | 0.96 |
| IPI00397930.3 | 57683 ZDBF2    | K.SVFETS  | 0.928728317 | 0.98 | S957  | 1.08 |
| IPI00398131.4 | 389421 LIN28B  | R.EVGGGI  | 0.001613065 | 0.72 | S203  | 1.65 |
| IPI00398154.2 | 60312 AFAP1    | K.KKPSTD  | 0.431601138 | 0.88 | T341  | 0.96 |
| IPI00398154.2 | 60312 AFAP1    | K.KKPSTD  | 0.431601138 | 0.88 | S342  | 0.96 |
| IPI00398154.2 | 60312 AFAP1    | K.KKPS*TI | 0.296993866 | 0.94 | S336  | 1.05 |
| IPI00398154.2 | 60312 AFAP1    | R.TLENSP  | 0.431601138 | 1    | S687  | 1.01 |
| IPI00398154.2 | 60312 AFAP1    | K.KKPS*TI | 0.98101429  | 1    | S336  | 0.99 |
| IPI00398154.2 | 60312 AFAP1    | K.KKPSTD  | 0.98101429  | 1    | T341  | 0.99 |
| IPI00398154.2 | 60312 AFAP1    | K.SGTSSP  | 0.296993866 | 1    | S668  | 1.14 |
| IPI00398154.2 | 60312 AFAP1    | K.EAYSGC  | 0.684201094 | 1    | S265  | 1.01 |
| IPI00398154.2 | 60312 AFAP1    | K.EAYSGC  | 0.684201094 | 1    | S264  | 1.01 |
| IPI00398505.5 | 23358 USP24    | R.HLQQG   | 0.088241621 | 0.86 | S2604 | 1.03 |
| IPI00398505.5 | 23358 USP24    | R.VSDQN   | 0.296993866 | 0.98 | S2047 | 1.14 |
| IPI00398505.5 | 23358 USP24    | K.NDINEA  | 0.40669332  | 0.96 | S63   | 0.88 |

|               |        |          |           |             |      |       |      |
|---------------|--------|----------|-----------|-------------|------|-------|------|
| IPI00398505.5 | 23358  | USP24    | K.NDINEA' | 0.40669332  | 0.96 | S58   | 0.88 |
| IPI00398505.5 | 23358  | USP24    | R.T*ISAQC | 0.033531167 | 0.98 | T2559 | 0.84 |
| IPI00398505.5 | 23358  | USP24    | R.TIS*AQC | 0.033531167 | 0.98 | S2561 | 0.84 |
| IPI00398718.5 | 4301   | MLLT4    | R.DYEPPS  | 0.000429319 | 0.74 | S1679 | 1.13 |
| IPI00398718.5 | 4301   | MLLT4    | R.SSPNVA  | 0.463105648 | 0.9  | S1165 | 1.04 |
| IPI00398718.5 | 4301   | MLLT4    | K.ITSVS*T | 0.072926818 | 0.96 | S1184 | 1.25 |
| IPI00398749.1 | 23369  | PUM2     | R.SGQGF   | 0.024009318 | 0.81 | S82   | 1.21 |
| IPI00398779.3 | 5339   | PLEC1    | R.TSS*EDI | 0.604563646 | 0.88 | S21   | 1.14 |
| IPI00398922.4 | 26472  | PPP1R14E | R.VYFQS*  | 0.431601138 | 0.92 | S84   | 0.9  |
| IPI00398994.3 | 57523  | KIAA1305 | K.EWNVGI  | 0.233505398 | 0.72 | S1887 | 1.24 |
| IPI00398998.2 | 91750  | LIN52    | K.LDRAS*I | 0.139636808 | 0.9  | S28   | 0.96 |
| IPI00399170.1 | 5976   | UPF1     | R.AYQHGC  | 0.726073545 | 1    | S1116 | 1    |
| IPI00399252.1 | 79960  | PHF17    | K.GVQVP\  | 0.27446972  | 0.96 | S89   | 1.17 |
| IPI00399252.1 | 79960  | PHF17    | K.GVQVP\  | 0.27446972  | 0.96 | T92   | 1.17 |
| IPI00399254.1 | 54726  | OTUD4    | K.RPEPST  | 0.007240509 | 0.98 | S546  | 1.38 |
| IPI00399306.1 | 5546   | PRCC     | K.IAAPELF | 0.27446972  | 0.98 | S157  | 1.02 |
| IPI00400834.1 | 23389  | THRAP2   | R.AGSSSL  | 0.12765804  | 0.88 | S817  | 0.88 |
| IPI00400834.1 | 23389  | THRAP2   | R.AGSSSL  | 0.253322457 | 0.96 | S817  | 1.04 |
| IPI00400867.1 | 53335  | BCL11A   | K.LLLGSP! | 0.980510506 | 0.83 | S628  | 0.86 |
| IPI00400867.1 | 53335  | BCL11A   | K.LLLGS*F | 0.980510506 | 0.83 | S625  | 0.86 |
| IPI00400867.1 | 53335  | BCL11A   | K.AVDKPP  | 0.088241621 | 0.9  | S88   | 0.88 |
| IPI00400867.1 | 53335  | BCL11A   | K.AVDKPP  | 0.088241621 | 0.9  | S86   | 0.88 |
| IPI00400922.4 | 22984  | PDCD11   | R.YSHVSC  | 0.296993866 | 0.83 | S1360 | 1.06 |
| IPI00401163.5 | 4253   | CTAGE5   | R.FCSNSC  | 0.116581414 | 0.94 | S606  | 1.31 |
| IPI00401163.5 | 4253   | CTAGE5   | R.AFLS*PF | 0.152571688 | 0.98 | S507  | 1.2  |
| IPI00401282.2 | 23307  | FKBP15   | R.RPS*QE  | 0.373234869 | 0.92 | S1079 | 1.15 |
| IPI00401282.2 | 23307  | FKBP15   | R.RPSQEC  | 0.346340474 | 0.88 | S1085 | 1.15 |
| IPI00401682.1 | 400793 | FLJ13137 | R.RAS*SP! | 0.152571688 | 0.98 | S222  | 1.13 |
| IPI00401682.1 | 400793 | FLJ13137 | R.ASS*PSI | 0.346340474 | 0.96 | S223  | 1.18 |
| IPI00401682.1 | 400793 | FLJ13137 | K.LSLSPIS | 0.442923356 | 0.86 | S249  | 0.9  |
| IPI00401682.1 | 400793 | FLJ13137 | R.RASS*P! | 0.373234869 | 1    | S223  | 1.12 |
| IPI00401682.1 | 400793 | FLJ13137 | R.TSS*LD! | 0.726073545 | 1    | S258  | 1    |
| IPI00401752.1 | 27153  | ZNF777   | R.GGCVS*  | 0.751811379 | 0.98 | S604  | 1.04 |
| IPI00402159.1 | 5932   | RBBP8    | K.SSTHPC  | 0.743182508 | 0.76 | S233  | 0.8  |
| IPI00402167.2 | 9220   | TIAF1    | K.RFS*FSC | 0.049260986 | 0.98 | S140  | 1.2  |
| IPI00402167.2 | 9220   | TIAF1    | R.RVSSSS  | 0.116581414 | 0.96 | S1073 | 1.34 |
| IPI00402167.2 | 9220   | TIAF1    | R.RVS*SS! | 0.152571688 | 1    | S1070 | 1.26 |
| IPI00402214.3 | 23053  | KIAA0913 | K.NVPES   | 0.9949766   | 0.81 | S336  | 0.7  |
| IPI00402576.2 | 285735 | LOC28573 | K.FFTMSR  | 0           | 0.59 | T71   | 0.19 |
| IPI00409590.1 | 4008   | LMO7     | R.RKSYT*! | 0.080258071 | 0.96 | T753  | 1.12 |
| IPI00409590.1 | 4008   | LMO7     | R.RKSYTS  | 0.080258071 | 0.96 | S754  | 1.12 |
| IPI00409590.1 | 4008   | LMO7     | R.S*ASVN  | 0.401648339 | 1    | S1491 | 1.07 |
| IPI00409590.1 | 4008   | LMO7     | R.SAS*VN  | 0.401648339 | 1    | S1493 | 1.07 |
| IPI00409638.2 | 163782 | ANKRD38  | K.EHPGRF  | 0.401648339 | 1    | S553  | 1.1  |
| IPI00409638.2 | 163782 | ANKRD38  | K.EHPGRF  | 0.373234869 | 1    | S554  | 1.05 |
| IPI00409638.2 | 163782 | ANKRD38  | K.EHPGRF  | 0.373234869 | 1    | T556  | 1.05 |
| IPI00409638.2 | 163782 | ANKRD38  | R.ASS*MP  | 0.088241621 | 0.96 | S164  | 1.3  |
| IPI00409638.2 | 163782 | ANKRD38  | R.AS*SMP  | 0.088241621 | 0.96 | S163  | 1.3  |
| IPI00409640.1 | 51599  | LSR      | K.AATSGV  | 0.836096036 | 1    | S332  | 1    |
| IPI00409640.1 | 51599  | LSR      | K.AATSGV  | 0.836096036 | 1    | S326  | 1    |
| IPI00409640.1 | 51599  | LSR      | K.AATSGV  | 0.836096036 | 1    | Y328  | 1    |

|               |       |          |            |             |      |       |      |
|---------------|-------|----------|------------|-------------|------|-------|------|
| IPI00409640.1 | 51599 | LSR      | R.ARS*VD   | 0.197661257 | 0.86 | S493  | 1.21 |
| IPI00409671.1 | 11325 | DDX42    | K.AGSSAA   | 0.813530126 | 0.92 | S758  | 1.01 |
| IPI00409671.1 | 11325 | DDX42    | K.AGSSAA   | 0.32093792  | 0.96 | S744  | 1.16 |
| IPI00409671.1 | 11325 | DDX42    | K.AGSSAA   | 0.431601138 | 1    | S751  | 1.1  |
| IPI00409671.1 | 11325 | DDX42    | R.YMAENF   | 0.643675939 | 0.66 | S185  | 0.69 |
| IPI00409671.1 | 11325 | DDX42    | R.YMAENF   | 0.829549043 | 0.79 | S185  | 0.62 |
| IPI00409671.1 | 11325 | DDX42    | K.AGSSAA   | 0.197661257 | 1    | S754  | 1.18 |
| IPI00409671.1 | 11325 | DDX42    | R.QQFHSF   | 0.463105648 | 0.92 | S109  | 1.05 |
| IPI00410067.1 | 56829 | ZC3HAV1  | R.SCTPSP   | 0.957149097 | 0.9  | S284  | 0.76 |
| IPI00410067.1 | 56829 | ZC3HAV1  | R.KFTYLG   | 0.822525206 | 0.98 | S302  | 0.99 |
| IPI00410067.1 | 56829 | ZC3HAV1  | R.SCTPS*I  | 0.431601138 | 1    | S275  | 1.04 |
| IPI00410067.1 | 56829 | ZC3HAV1  | R.AS*LEDJ  | 0.253322457 | 0.98 | S284  | 1.03 |
| IPI00410067.1 | 56829 | ZC3HAV1  | R.SS*LGSJ  | 0.907673183 | 0.96 | S387  | 0.99 |
| IPI00410067.1 | 56829 | ZC3HAV1  | K.TVFS*PI  | 0.401648339 | 1    | S378  | 1.08 |
| IPI00410103.1 | 51133 | KCTD3    | R.RTES*FI  | 0.769214181 | 0.94 | S664  | 1.04 |
| IPI00410103.1 | 51133 | KCTD3    | R.RTESFH   | 0.769214181 | 0.94 | S667  | 1.04 |
| IPI00410258.1 | 9150  | CTDP1    | K.RQPS*M   | 0.346340474 | 0.96 | S720  | 1.11 |
| IPI00410259.2 | 90102 | PHLDB2   | R.KYSS*S   | 0.27446972  | 0.76 | S243  | 1.08 |
| IPI00410259.2 | 90102 | PHLDB2   | R.KYS*SS   | 0.27446972  | 0.76 | S242  | 1.08 |
| IPI00410259.2 | 90102 | PHLDB2   | R.TASES*I  | 0.6467005   | 0.74 | S982  | 1.07 |
| IPI00410259.2 | 90102 | PHLDB2   | K.TTSSIS*  | 0.431601138 | 0.9  | S909  | 1    |
| IPI00410259.2 | 90102 | PHLDB2   | R.NDELLS   | 0.253322457 | 0.92 | T550  | 1.27 |
| IPI00410259.2 | 90102 | PHLDB2   | R.NDELLS   | 0.253322457 | 0.92 | T557  | 1.27 |
| IPI00410303.1 | 50807 | DDEF1    | K.SHPLDL   | 0.530774648 | 0.96 | S1027 | 0.93 |
| IPI00410351.1 | 9611  | NCOR1    | R.NDARS*   | 0.643675939 | 0.88 | S2200 | 0.97 |
| IPI00410351.1 | 9611  | NCOR1    | K.HEAPS*J  | 0.791231585 | 0.88 | S157  | 1.05 |
| IPI00410351.1 | 9611  | NCOR1    | R.PGSRVJ   | 0.296993866 | 0.94 | S2136 | 1.08 |
| IPI00410351.1 | 9611  | NCOR1    | R.KT*PEVJ  | 0.881970624 | 0.96 | T1383 | 0.9  |
| IPI00410351.1 | 9611  | NCOR1    | K.QQQLLE   | 0.604563646 | 0.96 | S224  | 1.03 |
| IPI00410351.1 | 9611  | NCOR1    | R.SHVSSE   | 0.214968943 | 0.96 | S2167 | 0.95 |
| IPI00410351.1 | 9611  | NCOR1    | R.NDARSF   | 0.863507405 | 1    | S2203 | 1.03 |
| IPI00410351.1 | 9611  | NCOR1    | K.AQLS*PI  | 0.261301769 | 0.96 | S1488 | 1.21 |
| IPI00410351.1 | 9611  | NCOR1    | R.S*PGSIE  | 0.995403769 | 1    | S2200 | 1.04 |
| IPI00410355.1 |       |          | R.EPSLS*FI | 0.472044151 | 0.9  | S558  | 0.78 |
| IPI00410369.1 | 79778 | MICALL2  | K.ATGEPG   | 0.166517367 | 0.98 | S207  | 1.18 |
| IPI00410383.1 | 2549  | GAB1     | R.SS*SLEI  | 0.233505398 | 0.98 | S418  | 1.07 |
| IPI00410383.1 | 2549  | GAB1     | R.SSS*LEI  | 0.401648339 | 1    | S419  | 1.08 |
| IPI00410485.2 | 51347 | TAOK3    | K.LADFGS   | 0.214968943 | 0.85 | S177  | 1.05 |
| IPI00410618.3 | 57456 | KIAA1143 | K.RIQPQP   | 0.197661257 | 0.94 | S50   | 1.21 |
| IPI00410618.3 | 57456 | KIAA1143 | R.IQPQPP   | 0.214968943 | 0.98 | S50   | 1.07 |
| IPI00410718.2 |       |          | R.SFLVAS   | 0.253322457 | 0.9  | S1285 | 0.93 |
| IPI00410718.2 |       |          | K.TAPVAS   | 0.029596689 | 0.83 | T382  | 0.97 |
| IPI00410718.2 |       |          | K.LSGEHS   | 0.296993866 | 0.98 | S1313 | 1.08 |
| IPI00410718.2 |       |          | K.LSGEHS   | 0.233505398 | 0.98 | S1314 | 1.08 |
| IPI00410718.2 |       |          | K.LSGEHS   | 0.181528891 | 0.98 | T1315 | 1.21 |
| IPI00410718.2 |       |          | K.TAPVAS   | 0.990601784 | 0.9  | T395  | 1.04 |
| IPI00410718.2 |       |          | K.TAPVAS   | 0.990601784 | 0.9  | S384  | 1.04 |
| IPI00410718.2 |       |          | K.TAPVAS   | 0.024009318 | 0.92 | S381  | 1.08 |
| IPI00410718.2 |       |          | K.SLDSEP   | 0.431601138 | 1    | S372  | 1.08 |
| IPI00410727.1 | 8997  | KALRN    | K.WLTS*PI  | 0.32093792  | 0.98 | S146  | 0.99 |
| IPI00411329.2 |       |          | K.SES*PKI  | 0.233505398 | 0.31 | S6    | 0.49 |

|               |       |          |             |             |      |       |      |
|---------------|-------|----------|-------------|-------------|------|-------|------|
| IPI00411329.2 |       | R.S*SGPY | 0.86862174  | 1           | S232 | 0.96  |      |
| IPI00411329.2 |       | R.S*SGPY | 0.197661257 | 0.94        | S232 | 1.08  |      |
| IPI00411461.1 | 22839 | DLGAP4   | R.KLS*SIG   | 0.566916624 | 0.94 | S126  | 1.17 |
| IPI00411559.2 | 10051 | SMC4     | K.ISLHPIE   | 0.909927945 | 0.79 | S1056 | 0.85 |
| IPI00411559.2 | 10051 | SMC4     | R.TES*PA    | 0.166517367 | 0.52 | S41   | 0.5  |
| IPI00411570.2 | 5905  | RANGAP1  | R.KILDPN    | 0.214968943 | 0.92 | S428  | 1.04 |
| IPI00411570.2 | 5905  | RANGAP1  | R.KILDPN    | 0.9240167   | 0.86 | S427  | 0.95 |
| IPI00411570.2 | 5905  | RANGAP1  | K.ILDPNTC   | 0.106353987 | 0.92 | S428  | 1.12 |
| IPI00411570.2 | 5905  | RANGAP1  | R.KILDPN    | 0.961909673 | 0.98 | S428  | 0.96 |
| IPI00411592.2 | 1107  | CHD3     | R.AS*SPTI   | 0.346340474 | 0.98 | S1532 | 1.04 |
| IPI00411592.2 | 1107  | CHD3     | K.TSPTTP    | 0.017465765 | 0.94 | S1549 | 0.57 |
| IPI00411592.2 | 1107  | CHD3     | K.TSPTTP    | 0.180060499 | 0.98 | S1549 | 0.73 |
| IPI00411592.2 | 1107  | CHD3     | K.TSPTT*F   | 0.809048575 | 0.96 | T1541 | 1.08 |
| IPI00411594.1 | 9330  | GTF3C3   | K.GKLS*AI   | 0.431601138 | 1    | S43   | 1.05 |
| IPI00411984.4 | 6788  | STK3     | R.NATS*P    | 0.643675939 | 0.98 | S385  | 1.07 |
| IPI00411984.4 | 6788  | STK3     | R.NATSPC    | 0.643675939 | 0.98 | S392  | 1.07 |
| IPI00411984.4 | 6788  | STK3     | R.NATSPC    | 0.005185657 | 0.88 | S392  | 0.88 |
| IPI00411984.4 | 6788  | STK3     | R.NAT*SP    | 0.032094189 | 0.88 | T384  | 0.88 |
| IPI00411984.4 | 6788  | STK3     | R.NATS*P    | 0.632655857 | 0.98 | S385  | 1    |
| IPI00412329.6 | 23373 | CRTC1    | R.RTNS*D    | 0.044561326 | 0.96 | S167  | 1.35 |
| IPI00412329.6 | 23373 | CRTC1    | R.RTNSDE    | 0.044561326 | 0.96 | S169  | 1.35 |
| IPI00412344.4 | 6732  | SRPK1    | R.GSAPH     | 0.346340474 | 1    | S51   | 1.1  |
| IPI00412364.5 | 84464 | BTBD12   | R.DCRS*P    | 0.373234869 | 0.96 | S786  | 1.08 |
| IPI00412364.5 | 84464 | BTBD12   | K.MGQCAI    | 1.49E-14    | 0.69 | S273  | 0.31 |
| IPI00412415.1 | 11177 | BAZ1A    | R.GKLS*S    | 0.595623706 | 0.98 | S1279 | 0.96 |
| IPI00412415.1 | 11177 | BAZ1A    | K.RQS*PE    | 0.684201094 | 0.52 | S1413 | 1.04 |
| IPI00412441.3 | 23063 | WAPAL    | K.RPESPS    | 0.27446972  | 0.98 | S308  | 1.17 |
| IPI00412441.3 | 23063 | WAPAL    | K.RPES*P    | 0.066203153 | 0.86 | S306  | 1.14 |
| IPI00412441.3 | 23063 | WAPAL    | K.RPES*P    | 0.463105648 | 0.92 | S306  | 1.16 |
| IPI00412441.3 | 23063 | WAPAL    | K.VEEEST    | 0.604563646 | 1    | S162  | 1.06 |
| IPI00412527.1 | 57198 | ATP8B2   | R.KKSDS*    | 0           | 0.64 | S1213 | 8.74 |
| IPI00412535.2 | 9898  | UBAP2L   | K.SPAVAT    | 0.401648339 | 0.9  | S460  | 0.99 |
| IPI00412535.2 | 9898  | UBAP2L   | R.RYPSSI    | 0.373234869 | 0.96 | S610  | 1.14 |
| IPI00412535.2 | 9898  | UBAP2L   | K.STSAPQ    | 0.726073545 | 0.98 | S469  | 1.08 |
| IPI00412535.2 | 9898  | UBAP2L   | K.STSAPQ    | 0.726073545 | 0.98 | S469  | 1.08 |
| IPI00412535.2 | 9898  | UBAP2L   | K.STSAPQ    | 0.743182508 | 0.98 | S472  | 1.03 |
| IPI00412535.2 | 9898  | UBAP2L   | K.STSAPQ    | 0.743182508 | 0.98 | S469  | 1.03 |
| IPI00412535.2 | 9898  | UBAP2L   | K.TAQALA    | 0.197661257 | 0.94 | S400  | 1.1  |
| IPI00412535.2 | 9898  | UBAP2L   | K.S*PAVA    | 0.791231585 | 0.96 | S441  | 1.05 |
| IPI00412535.2 | 9898  | UBAP2L   | K.S*PAVA    | 0.791231585 | 0.96 | S441  | 1.05 |
| IPI00412535.2 | 9898  | UBAP2L   | K.NPSDSA    | 0.922292588 | 1    | S418  | 1.03 |
| IPI00412535.2 | 9898  | UBAP2L   | K.TAQALA    | 0.096924105 | 0.92 | S402  | 1.14 |
| IPI00412535.2 | 9898  | UBAP2L   | R.RYPSSI    | 0.214968943 | 1    | S611  | 1.18 |
| IPI00412535.2 | 9898  | UBAP2L   | R.FPLDYY    | 0.604563646 | 0.86 | T845  | 0.95 |
| IPI00412535.2 | 9898  | UBAP2L   | R.FPLDYY    | 0.604563646 | 0.86 | T846  | 0.95 |
| IPI00412535.2 | 9898  | UBAP2L   | R.FPLDYY    | 0.604563646 | 0.86 | T849  | 0.95 |
| IPI00412535.2 | 9898  | UBAP2L   | R.RYPSSI    | 0.346340474 | 1    | T617  | 1.08 |
| IPI00412535.2 | 9898  | UBAP2L   | R.RYPSSI    | 0.346340474 | 1    | S610  | 1.08 |
| IPI00412535.2 | 9898  | UBAP2L   | R.RYPSSI    | 0.346340474 | 1    | S609  | 1.08 |
| IPI00412535.2 | 9898  | UBAP2L   | R.RYPSSI    | 0.253322457 | 1    | S611  | 1.08 |
| IPI00412535.2 | 9898  | UBAP2L   | K.SPAVAT    | 0.373234869 | 1    | S456  | 1.09 |

|               |                 |            |             |            |      |
|---------------|-----------------|------------|-------------|------------|------|
| IPI00412535.2 | 9898 UBAP2L     | K.SPAVAT   | 0.373234869 | 1 S455     | 1.09 |
| IPI00412535.2 | 9898 UBAP2L     | R.RYPSS*   | 0.12765804  | 1 S607     | 1.2  |
| IPI00412650.1 | 6840 SVIL       | K.YGS*FEI  | 0.021229856 | 0.85 S968  | 0.7  |
| IPI00412672.1 | 5585 PKN1       | R.T*STFC   | 0.49616549  | 0.85 T778  | 1.09 |
| IPI00412672.1 | 5585 PKN1       | R.TS*TFCC  | 0.49616549  | 0.85 S779  | 1.09 |
| IPI00412672.1 | 5585 PKN1       | R.TDVSNF   | 0.623338592 | 0.69 S922  | 1.07 |
| IPI00412752.1 | 6774 STAT3      | K.YCRPES   | 0.088241621 | 0.92 Y704  | 1.24 |
| IPI00412752.1 | 6774 STAT3      | K.YCRPES   | 0.096924105 | 0.96 Y705  | 1.36 |
| IPI00412771.1 | 23607 CD2AP     | K.DTCYS*I  | 0.026666866 | 0.77 S542  | 1.01 |
| IPI00412771.1 | 23607 CD2AP     | K.DTCYS*I  | 0.088241621 | 0.92 S542  | 1    |
| IPI00412771.1 | 23607 CD2AP     | K.DTCYS*I  | 0.088241621 | 0.92 S542  | 1    |
| IPI00412771.1 | 23607 CD2AP     | R.TSSSET   | 0.197661257 | 1 T236     | 1.14 |
| IPI00412771.1 | 23607 CD2AP     | R.TSS*SE   | 0.197661257 | 1 S233     | 1.14 |
| IPI00412771.1 | 23607 CD2AP     | R.TS*SSE   | 0.197661257 | 1 S232     | 1.14 |
| IPI00412782.5 | 9181 ARHGEF2    | K.S*VSTTN  | 0.166517367 | 0.98 S149  | 1.14 |
| IPI00412782.5 | 9181 ARHGEF2    | K.SVSTTN   | 0.932027377 | 0.52 T153  | 0.93 |
| IPI00412782.5 | 9181 ARHGEF2    | K.SVS*TTN  | 0.197661257 | 0.98 S151  | 1.28 |
| IPI00412782.5 | 9181 ARHGEF2    | K.SVSTTN   | 0.566916624 | 0.74 S163  | 0.96 |
| IPI00412782.5 | 9181 ARHGEF2    | R.EPALPL   | 0.181528891 | 0.74 T694  | 1.04 |
| IPI00413100.1 | 23187 PHLDB1    | R.S*PSPTI  | 0.007240509 | 0.67 S518  | 0.92 |
| IPI00413100.1 | 23187 PHLDB1    | R.TRS*PS   | 0.32093792  | 0.98 S518  | 1.13 |
| IPI00413100.1 | 23187 PHLDB1    | R.WAAHG    | 0.530774648 | 0.98 S501  | 0.96 |
| IPI00413144.3 | 90381 C15orf42  | R.HVLQTA   | 0.604563646 | 0.01 S441  | 0.34 |
| IPI00413144.3 | 90381 C15orf42  | R.SDWHA    | 0.233505398 | 0.76 S1453 | 0.81 |
| IPI00413144.3 | 90381 C15orf42  | R.ISHTPQ   | 0.49616549  | 0.96 T1134 | 1.12 |
| IPI00413144.3 | 90381 C15orf42  | R.NLFNQE   | 0.00181541  | 0.96 S923  | 1.1  |
| IPI00413365.2 | 24149 ZNF318    | K.RPETWE   | 0.296993866 | 0.88 S1971 | 0.92 |
| IPI00413365.2 | 24149 ZNF318    | R.IPS*PNII | 0.253322457 | 0.96 S2101 | 1.13 |
| IPI00413483.1 | 9704 DHX34      | R.LQEEQL   | 0.49616549  | 0.98 S749  | 1.07 |
| IPI00413562.2 | 80790 CMIP      | R.LLHPS*F  | 0.331526627 | 0.98 S283  | 0.78 |
| IPI00413659.3 | 54890 ALKBH5    | R.RGS*FS   | 0.253322457 | 1 S361     | 1.11 |
| IPI00413663.5 | 23143 LRCH1     | R.NLESIDF  | 0.643675939 | 0.96 T574  | 1.06 |
| IPI00413663.5 | 23143 LRCH1     | R.ENS*PA   | 0.180060499 | 0.85 S538  | 0.81 |
| IPI00413669.4 | 54816 SUHW4     | K.RPS*TSI  | 0           | 0.81 S179  | 5.48 |
| IPI00413669.4 | 54816 SUHW4     | R.ASVGPL   | 0.214968943 | 0.98 S249  | 1.09 |
| IPI00413671.1 | 9774 BCLAF1     | K.LKDLFD   | 0.643675939 | 0.94 Y509  | 0.92 |
| IPI00413671.1 | 9774 BCLAF1     | K.STFREE   | 0.233505398 | 0.96 S529  | 1.22 |
| IPI00413671.1 | 9774 BCLAF1     | K.DLFDYS   | 0.604563646 | 0.9 S510   | 0.93 |
| IPI00413671.1 | 9774 BCLAF1     | R.RIDISPS  | 0.181528891 | 1 T659     | 1.18 |
| IPI00413671.1 | 9774 BCLAF1     | R.IDIS*PS  | 0.296993866 | 1 S656     | 1.15 |
| IPI00413671.1 | 9774 BCLAF1     | R.RIDIS*P  | 0.214968943 | 1 S656     | 1.14 |
| IPI00413671.1 | 9774 BCLAF1     | R.RIDISPS  | 0.181528891 | 1 S658     | 1.14 |
| IPI00413671.1 | 9774 BCLAF1     | K.LKDLFD   | 0.566916624 | 1 S510     | 1.01 |
| IPI00413780.3 | 29941 PKN3      | R.SPAAAL   | 0.27446972  | 0.94 S307  | 1.11 |
| IPI00414022.1 | 90933 TRIM41    | R.VDLTLD   | 0.858914691 | 0.92 S447  | 0.97 |
| IPI00414058.1 | 2869 GRK5       | K.TSFNHH   | 0.726073545 | 1 S586     | 1    |
| IPI00414058.1 | 2869 GRK5       | K.DVLDIEC  | 0.49616549  | 1 S484     | 1.1  |
| IPI00414058.1 | 2869 GRK5       | K.DVLDIEC  | 0.49616549  | 1 T485     | 1.1  |
| IPI00414095.4 | 56478 EIF4ENIF1 | K.WHASLY   | 0.726073545 | 0.94 S74   | 0.95 |
| IPI00414095.4 | 56478 EIF4ENIF1 | R.WFSNP    | 0.431601138 | 0.94 S182  | 1.02 |
| IPI00414095.4 | 56478 EIF4ENIF1 | K.WHASLY   | 0.233505398 | 0.98 S74   | 1.09 |



|               |        |           |           |             |      |       |      |
|---------------|--------|-----------|-----------|-------------|------|-------|------|
| IPI00414095.4 | 56478  | EIF4ENIF1 | K.WHASLY  | 0.233505398 | 0.98 | Y71   | 1.09 |
| IPI00414095.4 | 56478  | EIF4ENIF1 | K.WHASLY  | 0.233505398 | 0.98 | S74   | 1.09 |
| IPI00414095.4 | 56478  | EIF4ENIF1 | R.LAGLEQ  | 0.530774648 | 0.85 | S211  | 0.82 |
| IPI00414095.4 | 56478  | EIF4ENIF1 | R.LAGLEQ  | 0.197661257 | 0.92 | S211  | 1.18 |
| IPI00414095.4 | 56478  | EIF4ENIF1 | R.APS*PPI | 0.233505398 | 0.85 | S389  | 0.95 |
| IPI00414127.3 | 5902   | RANBP1    | K.DTHEDF  | 0.643675939 | 0.98 | T15   | 0.99 |
| IPI00414127.3 | 5902   | RANBP1    | K.DTHEDF  | 0.643675939 | 0.98 | T13   | 0.99 |
| IPI00414367.1 | 57224  | NHSL1     | R.HS*VINV | 0.253322457 | 0.88 | S964  | 1.14 |
| IPI00414367.1 | 57224  | NHSL1     | R.NHS*PS  | 0.197661257 | 0.77 | S1753 | 0.94 |
| IPI00414367.1 | 57224  | NHSL1     | K.ESSAAC  | 0.643675939 | 0.96 | S1601 | 1.17 |
| IPI00414367.1 | 57224  | NHSL1     | K.T*ITGVP | 0.401648339 | 0.69 | T209  | 1.23 |
| IPI00414367.1 | 57224  | NHSL1     | R.SPGAP   | 0.021601024 | 0.9  | S1506 | 1.12 |
| IPI00414367.1 | 57224  | NHSL1     | R.S*PGAP  | 0.961160996 | 0.98 | S1492 | 1.01 |
| IPI00414367.1 | 57224  | NHSL1     | R.LDSDAC  | 0.990601784 | 0.92 | S653  | 1.04 |
| IPI00414367.1 | 57224  | NHSL1     | R.SPGAP   | 0.139636808 | 1    | S1516 | 1.25 |
| IPI00414367.1 | 57224  | NHSL1     | R.S*LIYTD | 0.106353987 | 0.96 | S190  | 1.17 |
| IPI00414367.1 | 57224  | NHSL1     | R.RKT*ITG | 0.233505398 | 1    | T209  | 1.13 |
| IPI00414367.1 | 57224  | NHSL1     | K.ESSAAC  | 0.530774648 | 1    | S1599 | 1.14 |
| IPI00414482.2 | 2975   | GTF3C1    | R.PLEGSS  | 0.166517367 | 0.94 | S1877 | 1.05 |
| IPI00414482.2 | 2975   | GTF3C1    | R.RAS*WA  | 0.346340474 | 0.98 | S1886 | 1.18 |
| IPI00414482.2 | 2975   | GTF3C1    | R.PLEGSS  | 0.32093792  | 1    | S1875 | 1.08 |
| IPI00414482.2 | 2975   | GTF3C1    | R.EDPQAF  | 0.431601138 | 0.98 | S1875 | 1.1  |
| IPI00414482.2 | 2975   | GTF3C1    | R.EDPQAF  | 0.431601138 | 0.98 | S1877 | 1.1  |
| IPI00414497.1 |        |           | K.KLLEDTI | 0.463105648 | 0.55 | S615  | 0.63 |
| IPI00414497.1 |        |           | R.KPSGS*  | 0.401648339 | 0.98 | S445  | 1.11 |
| IPI00414497.1 |        |           | K.SSSVSP  | 0.451162192 | 0.79 | S382  | 0.22 |
| IPI00414497.1 |        |           | K.ETDPVK  | 0.604563646 | 0.98 | S108  | 1.04 |
| IPI00414497.1 |        |           | K.ET*DPVI | 0.604563646 | 0.98 | T103  | 1.04 |
| IPI00414497.1 |        |           | R.KPSGS*  | 0.530774648 | 1    | S445  | 1.07 |
| IPI00414497.1 |        |           | K.SSSVSP  | 0.12765804  | 1    | S382  | 1.27 |
| IPI00414497.1 |        |           | R.KTS*PA  | 0.447034483 | 0.96 | S459  | 0.9  |
| IPI00414497.1 |        |           | K.TAPTLS' | 0.643675939 | 1    | S405  | 1.04 |
| IPI00414497.1 |        |           | K.LAPVPS  | 0.566916624 | 1    | S204  | 1.04 |
| IPI00414497.1 |        |           | K.LAPVPS  | 0.604563646 | 1    | S204  | 1.05 |
| IPI00414576.2 | 4542   | MYO1F     | R.NRDVLF  | 0.002581506 | 0.85 | S537  | 0.82 |
| IPI00414603.2 | 402057 | LOC40205  | K.LLDFGS  | 0.917421569 | 0.9  | S115  | 0.81 |
| IPI00414603.2 | 402057 | LOC40205  | K.LLDFGS  | 0.530774648 | 0.96 | S113  | 1.06 |
| IPI00414657.4 | 63922  | CHTF18    | R.GDAASE  | 0.013541797 | 0.72 | S64   | 0.79 |
| IPI00414657.4 | 63922  | CHTF18    | R.GGGQLI  | 0.346340474 | 0.98 | S253  | 1.02 |
| IPI00414657.4 | 63922  | CHTF18    | R.VENSPC  | 0.01011525  | 0.76 | S899  | 1.07 |
| IPI00414696.1 | 3181   | HNRPA2B   | R.GFGDG'  | 0.604563646 | 1    | S247  | 0.99 |
| IPI00414696.1 | 3181   | HNRPA2B   | R.NMGGP'  | 0.003916407 | 0.85 | S332  | 0.89 |
| IPI00414723.2 | 644820 | hCG_1983  | K.YGPADV  | 0.116581414 | 0.92 | S106  | 1.11 |
| IPI00414723.2 | 644820 | hCG_1983  | K.YGPADV  | 0.49616549  | 0.92 | S106  | 0.9  |
| IPI00414723.2 | 644820 | hCG_1983  | K.YGPADV  | 0.32093792  | 0.92 | T93   | 1    |
| IPI00414723.2 | 644820 | hCG_1983  | K.YGPADV  | 0.32093792  | 0.92 | S90   | 1    |
| IPI00414723.2 | 644820 | hCG_1983  | K.YGPADV  | 0.346340474 | 1    | T87   | 1.12 |
| IPI00414827.1 | 57522  | SRGAP1    | K.NSPTPA  | 0.181528891 | 0.92 | S985  | 1.16 |
| IPI00414827.1 | 57522  | SRGAP1    | K.NSPTPA  | 0.106353987 | 0.88 | S982  | 1.15 |
| IPI00414827.1 | 57522  | SRGAP1    | K.NSPTPA  | 0.106353987 | 0.92 | S987  | 1.1  |
| IPI00414827.1 | 57522  | SRGAP1    | R.ST*SSS  | 0.49616549  | 0.96 | T1005 | 1.18 |

|               |               |           |             |            |      |
|---------------|---------------|-----------|-------------|------------|------|
| IPI00414886.1 | 9639 ARHGEF1  | R.TKS*LIA | 0.009053635 | 0.96 S315  | 1.39 |
| IPI00418132.3 |               | R.SISTPT* | 0.756570768 | 0.52 T167  | 0.71 |
| IPI00418169.2 | 302 ANXA2     | K.LSLEGD  | 0.836096036 | 0.98 T37   | 1.07 |
| IPI00418184.1 |               | K.KHPDAS  | 0.563781928 | 0.83 S39   | 0.9  |
| IPI00418184.1 |               | K.KHPDAS  | 0.563781928 | 0.83 S35   | 0.9  |
| IPI00418316.5 | 23613 ZMYND8  | K.ELSESV  | 0.643675939 | 0.92 S567  | 1.03 |
| IPI00418316.5 | 23613 ZMYND8  | K.TGQAGE  | 0.643675939 | 0.96 S510  | 0.82 |
| IPI00418316.5 | 23613 ZMYND8  | R.RIS*LSD | 0.233505398 | 0.98 S445  | 1.2  |
| IPI00418336.2 | 65123 INTS3   | K.FPEFCS  | 0.49616549  | 0.62 S499  | 0.82 |
| IPI00418336.2 | 65123 INTS3   | R.EKFPEF  | 0.181528891 | 0.9 S501   | 1.03 |
| IPI00418362.1 | 56033 BARX1   | K.IVLQGG  | 0.300293467 | 0.98 T211  | 0.91 |
| IPI00418362.1 | 56033 BARX1   | K.IVLQGG  | 0.300293467 | 0.98 S209  | 0.91 |
| IPI00418374.2 | 92154 ABBA-1  | K.RLS*LPM | 0.834430989 | 0.88 S643  | 0.98 |
| IPI00418374.2 | 92154 ABBA-1  | K.GGGAP   | 0.530774648 | 0.92 S300  | 1.14 |
| IPI00418374.2 | 92154 ABBA-1  | K.RLS*LPM | 0.096924105 | 1 S643     | 1.2  |
| IPI00418374.2 | 92154 ABBA-1  | K.TPTVPD  | 0.139636808 | 1 S605     | 1.23 |
| IPI00418374.2 | 92154 ABBA-1  | R.AGS*EE  | 0.082584274 | 0.86 S616  | 0.9  |
| IPI00418388.1 |               | R.RSS*GT  | 0.431601138 | 0.98 S442  | 1.13 |
| IPI00418458.3 | 5411 PNN      | R.RGFS*D  | 0.03282354  | 0.35 S66   | 0.91 |
| IPI00418458.3 | 5411 PNN      | K.SLS*PGI | 0.824668282 | 0.71 S443  | 0.72 |
| IPI00418458.3 | 5411 PNN      | K.S*LSPGI | 0.824668282 | 0.71 S441  | 0.72 |
| IPI00418482.1 | 51564 HDAC7A  | R.T*VHPN  | 0.947647721 | 0.98 T143  | 1.19 |
| IPI00418482.1 | 51564 HDAC7A  | R.TVHPNS  | 0.694048494 | 0.96 S148  | 0.88 |
| IPI00418482.1 | 51564 HDAC7A  | R.AQS*SP  | 0.000141509 | 0.66 S525  | 1.23 |
| IPI00418489.2 | 57496 MKL2    | K.SGEISLF | 0.197661257 | 0.9 S882   | 1.29 |
| IPI00418600.1 | 619279 ZNF704 | R.QHAHTV  | 3.04E-12    | 0.9 S367   | 2.72 |
| IPI00418711.1 |               | R.AS*VS*E | 0.756570768 | 0.98 S192  | 0.91 |
| IPI00419037.2 | 343641 TGM6   | R.EAQMEI  | 0.92716125  | 0.72 T96   | 0.7  |
| IPI00419273.4 | 8451 CUL4A    | R.KGS*FS  | 0.072926818 | 0.96 S10   | 1.13 |
| IPI00419322.1 |               | R.KRS*EG  | 0.32093792  | 0.98 S454  | 0.94 |
| IPI00419322.1 |               | R.KRSEGF  | 0.32093792  | 0.98 S458  | 0.94 |
| IPI00419337.1 | 4356 MPP3     | K.NKEPLG  | 0.021601024 | 0.98 T150  | 1.51 |
| IPI00419431.4 | 55252 ASXL2   | R.KVSSSS  | 0.004600913 | 0.86 S146  | 1.35 |
| IPI00419431.4 | 55252 ASXL2   | R.KVSSSS* | 0.995403769 | 0.96 S138  | 0.96 |
| IPI00419431.4 | 55252 ASXL2   | R.KVS*SS  | 0.995403769 | 0.96 S136  | 0.96 |
| IPI00419431.4 | 55252 ASXL2   | R.IVPVVS  | 0.919312669 | 0.98 S440  | 1    |
| IPI00419431.4 | 55252 ASXL2   | K.APS*PT  | 0.726073545 | 0.96 S834  | 0.99 |
| IPI00419450.2 | 23403 FBXO46  | R.ADEASE  | 0.12765804  | 0.79 S338  | 1.05 |
| IPI00419604.1 | 374291 NDUFS7 | R.QS*DVM  | 2.09E-07    | 0.96 S124  | 2.35 |
| IPI00419684.2 | 1912 PHC2     | K.LPQQDF  | 0.438828959 | 0.69 S86   | 0.73 |
| IPI00419849.3 | 8725 C19orf2  | R.KNS*TG  | 0.604563646 | 0.96 S345  | 1.03 |
| IPI00419894.1 | 1523 CUTL1    | R.RHSS*V  | 0.214968943 | 0.88 S1227 | 1.16 |
| IPI00419894.1 | 1523 CUTL1    | R.RHS*SV  | 0.253322457 | 0.96 S1226 | 1.16 |
| IPI00419894.1 | 1523 CUTL1    | R.RHS*S\  | 0.253322457 | 0.96 S1226 | 1.16 |
| IPI00419894.1 | 1523 CUTL1    | R.HSSVSC  | 0.181528891 | 0.94 S1244 | 1.18 |
| IPI00419894.1 | 1523 CUTL1    | R.HSSVSC  | 0.152571688 | 0.94 S1248 | 1.12 |
| IPI00419894.1 | 1523 CUTL1    | R.HSS*VS  | 0.566916624 | 0.98 S1227 | 1.17 |
| IPI00419894.1 | 1523 CUTL1    | R.HSS*VS  | 0.27446972  | 0.98 S1227 | 1.17 |
| IPI00419894.1 | 1523 CUTL1    | R.RHSS*V  | 0.116581414 | 0.94 S1227 | 1.09 |
| IPI00419894.1 | 1523 CUTL1    | R.HSS*VS  | 0.197661257 | 1 S1227    | 1.15 |
| IPI00419894.1 | 1523 CUTL1    | R.AYQQKF  | 0.463105648 | 0.98 S1281 | 1.05 |

|               |                 |           |             |            |       |
|---------------|-----------------|-----------|-------------|------------|-------|
| IPI00419894.1 | 1523 CUTL1      | R.HSS*VS  | 0.197661257 | 1 S1227    | 1.18  |
| IPI00419922.1 | 23288 IQCE      | R.S*ASNG  | 0.197661257 | 0.94 S128  | 1.14  |
| IPI00419933.1 | 144100 PLEKHA7  | R.KVTS*PI | 0.373234869 | 0.81 S903  | 0.91  |
| IPI00419979.2 | 5062 PAK2       | K.YLSFT*F | 0.233505398 | 0.86 T143  | 1.01  |
| IPI00419979.2 | 5062 PAK2       | K.YLS*FTF | 0.431601138 | 0.81 S141  | 0.86  |
| IPI00420019.1 | 255057 C19orf26 | R.HAS*LDI | 0.756144089 | 1 S299     | 0.93  |
| IPI00420019.1 | 255057 C19orf26 | K.IVTIHEC | 0.727601611 | 0.88 S200  | 0.84  |
| IPI00420019.1 | 255057 C19orf26 | R.LAEPVV  | 0.726073545 | 1 S719     | 1     |
| IPI00420019.1 | 255057 C19orf26 | R.AASEST  | 0.86862174  | 0.96 T344  | 1     |
| IPI00420019.1 | 255057 C19orf26 | R.AAS*ES  | 0.86862174  | 0.96 S361  | 1     |
| IPI00420061.2 | 157680 VPS13B   | R.GNLNLS  | 0.891255812 | 0.77 S1263 | 0.93  |
| IPI00420061.2 | 157680 VPS13B   | K.LVHNLT  | 0.253322457 | 0.94 S3027 | 0.89  |
| IPI00423207.1 |                 | R.TTVALP  | 0.32093792  | 0.94 S178  | 1.13  |
| IPI00423207.1 |                 | R.TTVALP  | 0.32093792  | 0.94 T177  | 1.13  |
| IPI00423207.1 |                 | -.MPVAVA  | 0           | 0.72 T33   | 59.71 |
| IPI00424464.1 | 9765 ZFYVE16    | R.NEIIQS* | 0.431601138 | 0.94 S939  | 1.02  |
| IPI00425405.1 | 55605 KIF21A    | K.HSDSGT  | 0.106353987 | 0.96 S1261 | 1.21  |
| IPI00425405.1 | 55605 KIF21A    | K.HSDSGT  | 0.106353987 | 0.98 S1258 | 1.26  |
| IPI00425405.1 | 55605 KIF21A    | K.KIPEPS* | 0.080258071 | 1 S1226    | 1.31  |
| IPI00425405.1 | 55605 KIF21A    | K.HSDSGT  | 0.088241621 | 0.98 S1258 | 1.22  |
| IPI00425405.1 | 55605 KIF21A    | R.KLS*SSI | 0.214968943 | 1 S840     | 1.18  |
| IPI00425405.1 | 55605 KIF21A    | R.EKELS*F | 0.346340474 | 1 S1199    | 1.14  |
| IPI00425560.1 | 23513 SCRIB     | R.VQS*PE  | 0.116581414 | 0.77 S1475 | 1.2   |
| IPI00425560.1 | 23513 SCRIB     | R.LAEAPS  | 0.463105648 | 0.94 S1547 | 1.01  |
| IPI00425560.1 | 23513 SCRIB     | R.LAEAPS  | 0.346340474 | 0.94 S1547 | 1.01  |
| IPI00425560.1 | 23513 SCRIB     | K.RVS*LV  | 0.072926818 | 0.25 S1378 | 0.79  |
| IPI00425560.1 | 23513 SCRIB     | R.AFAALP  | 0.463105648 | 0.81 S1591 | 1.18  |
| IPI00425560.1 | 23513 SCRIB     | R.HDHAVE  | 0.32093792  | 0.79 S939  | 0.68  |
| IPI00425560.1 | 23513 SCRIB     | R.LAEAPS  | 0.643675939 | 0.96 T1560 | 1.06  |
| IPI00425560.1 | 23513 SCRIB     | R.NS*LESI | 0.813530126 | 0.94 S1220 | 1.11  |
| IPI00425560.1 | 23513 SCRIB     | R.SLEPSP  | 0.936890791 | 0.92 S1606 | 1.05  |
| IPI00425560.1 | 23513 SCRIB     | R.QSPAS*  | 0.566916624 | 1 S1448    | 1.03  |
| IPI00425560.1 | 23513 SCRIB     | R.LAEAPS  | 0.684201094 | 1 S1559    | 1     |
| IPI00425560.1 | 23513 SCRIB     | R.HCSLQA  | 0.346340474 | 1 S35      | 1.11  |
| IPI00425560.1 | 23513 SCRIB     | K.RVS*LV  | 0.373234869 | 1 S1378    | 1.03  |
| IPI00425560.1 | 23513 SCRIB     | R.LAEAPS  | 0.946608772 | 0.98 S1566 | 0.71  |
| IPI00425560.1 | 23513 SCRIB     | R.LPLLPI  | 0.401648339 | 1 S853     | 1.1   |
| IPI00425560.1 | 23513 SCRIB     | R.LAEAPS  | 0.643675939 | 0.94 S1561 | 0.8   |
| IPI00425560.1 | 23513 SCRIB     | R.LAEAPS  | 0.401648339 | 1 T1560    | 1.1   |
| IPI00426447.2 | 613 BCR         | R.HQDGLF  | 0.604563646 | 0.85 S102  | 0.85  |
| IPI00426447.2 | 613 BCR         | R.HQDGLF  | 0.813530126 | 0.85 S100  | 0.93  |
| IPI00426447.2 | 613 BCR         | R.HQDGLF  | 0.800118017 | 0.69 S462  | 0.82  |
| IPI00426447.2 | 613 BCR         | R.HQDGLF  | 0.756144089 | 0.69 S459  | 0.82  |
| IPI00426447.2 | 613 BCR         | R.ASASRF  | 0.116581414 | 0.96 S122  | 1.25  |
| IPI00426728.3 | 8930 MBD4       | K.YNKEAL  | 0           | 0.71 S422  | 3.64  |
| IPI00426728.3 | 8930 MBD4       | R.SLS*SG  | 0.928728317 | 0.96 S318  | 0.95  |
| IPI00427522.1 | 5469 PPARBP     | K.ALAPAD  | 0.03637398  | 0.92 S953  | 1.72  |
| IPI00427522.1 | 5469 PPARBP     | R.NKKPS*  | 0.905247537 | 1 S1302    | 0.93  |
| IPI00427522.1 | 5469 PPARBP     | K.ADTEGK  | 0.072926818 | 0.96 S1021 | 1.2   |
| IPI00427522.1 | 5469 PPARBP     | R.SQT*PP  | 0.253322457 | 0.92 T1051 | 0.91  |
| IPI00427522.1 | 5469 PPARBP     | K.LAS*PMI | 0.233505398 | 1 S1207    | 1.17  |

|               |        |          |           |             |      |       |      |
|---------------|--------|----------|-----------|-------------|------|-------|------|
| IPI00427522.1 | 5469   | PPARBP   | K.LPSTSD  | 0           | 0.59 | T805  | 0.11 |
| IPI00428954.1 | 8861   | LDB1     | K.KKSPAS  | 0.152571688 | 0.98 | S295  | 1.16 |
| IPI00428954.1 | 8861   | LDB1     | K.KKS*PA  | 0.152571688 | 0.98 | S287  | 1.09 |
| IPI00429547.2 | 54812  | AFTPH    | R.KPLSTH  | 0.152571688 | 0.9  | S226  | 1.03 |
| IPI00430440.2 | 9686   | VGLL4    | R.PAGLS*I | 0.37570848  | 0.88 | S118  | 1.22 |
| IPI00430440.2 | 9686   | VGLL4    | K.NSLDAS  | 0.000233021 | 0.83 | T122  | 1.29 |
| IPI00430440.2 | 9686   | VGLL4    | K.NSLDAS  | 0.530774648 | 1    | S118  | 1.2  |
| IPI00430473.1 |        |          | K.FLNEHL  | 0.643675939 | 0.92 | T209  | 1.09 |
| IPI00431127.2 | 8812   | CCNK     | K.RAVVVS  | 0.088241621 | 0.88 | S340  | 1.16 |
| IPI00431263.2 | 9772   | KIAA0195 | R.SKHPS*  | 0.27446972  | 0.96 | S513  | 1.14 |
| IPI00431263.2 | 9772   | KIAA0195 | R.SKHPS*  | 0.253322457 | 0.94 | S513  | 1.17 |
| IPI00431698.2 | 64784  | CRTC3    | R.SQLS*FI | 0.373234869 | 0.79 | S437  | 1.3  |
| IPI00431698.2 | 64784  | CRTC3    | R.LTQYHC  | 0.463105648 | 1    | S62   | 1.11 |
| IPI00431698.2 | 64784  | CRTC3    | R.SQLSFL  | 0.080258071 | 0.92 | S448  | 1.27 |
| IPI00431698.2 | 64784  | CRTC3    | R.LFSL*NB | 0.373234869 | 0.98 | S375  | 1.11 |
| IPI00432061.3 | 11129  | SFRS16   | K.LTRPAA  | 0.233505398 | 0.96 | S532  | 1.15 |
| IPI00432436.1 | 65979  | PHACTR4  | K.RPLSSS  | 0.530774648 | 0.88 | S178  | 0.97 |
| IPI00432436.1 | 65979  | PHACTR4  | R.RLS*QR  | 0.530774648 | 0.76 | S590  | 1.28 |
| IPI00432436.1 | 65979  | PHACTR4  | R.TRS*LPI | 0.116581414 | 1    | S464  | 1.24 |
| IPI00432436.1 | 65979  | PHACTR4  | R.LGS*TG  | 0.99978897  | 0.79 | S147  | 0.85 |
| IPI00432751.1 | 55054  | ATG16L1  | R.S*VSSFI | 6.99E-08    | 0.69 | S287  | 0.58 |
| IPI00432751.1 | 55054  | ATG16L1  | R.SVS*SFI | 6.99E-08    | 0.69 | S289  | 0.58 |
| IPI00432780.1 | 286133 | SCARA5   | R.SLS*KLM | 0.868109485 | 0.96 | S30   | 0.97 |
| IPI00432780.1 | 286133 | SCARA5   | R.S*LSKLM | 0.773594539 | 0.96 | S28   | 0.97 |
| IPI00432853.1 |        |          | K.GGSA/   | 0.049260986 | 1    | S159  | 1.32 |
| IPI00432907.1 |        |          | R.TVGQTV  | 0.32093792  | 0.98 | S25   | 1.08 |
| IPI00433194.1 | 23301  | EHBP1    | R.T*SGSD  | 0.703604632 | 0.94 | T628  | 1.14 |
| IPI00433194.1 | 23301  | EHBP1    | K.LNFLDE  | 0.761414517 | 0.98 | T256  | 0.93 |
| IPI00433194.1 | 23301  | EHBP1    | K.LNFLDE  | 0.761414517 | 0.98 | T258  | 0.93 |
| IPI00433194.1 | 23301  | EHBP1    | R.TSGS*D  | 0.746895813 | 0.83 | S631  | 1.02 |
| IPI00433194.1 | 23301  | EHBP1    | K.EVQTPC  | 0.088241621 | 0.92 | T296  | 1.06 |
| IPI00433194.1 | 23301  | EHBP1    | K.DLS*TSF | 0.116581414 | 1    | S391  | 1.25 |
| IPI00433194.1 | 23301  | EHBP1    | K.DLSTS*F | 0.116581414 | 1    | S393  | 1.25 |
| IPI00433211.1 | 146909 | LOC14690 | R.GSLPDT  | 0.32093792  | 0.96 | S678  | 1    |
| IPI00433211.1 | 146909 | LOC14690 | R.RGS*LP  | 0.139636808 | 0.94 | S671  | 1.16 |
| IPI00433211.1 | 146909 | LOC14690 | R.GSLPDT  | 0.000547756 | 0.96 | T683  | 1.07 |
| IPI00433211.1 | 146909 | LOC14690 | R.RGS*LP  | 0.000787564 | 0.86 | S671  | 0.99 |
| IPI00433211.1 | 146909 | LOC14690 | R.RGS*LP  | 0.27446972  | 0.96 | S671  | 1.04 |
| IPI00433211.1 | 146909 | LOC14690 | R.RGS*LP  | 0.139636808 | 0.96 | S671  | 1.04 |
| IPI00433211.1 | 146909 | LOC14690 | K.KLQVYE  | 0.353263807 | 0.86 | S413  | 0.64 |
| IPI00433211.1 | 146909 | LOC14690 | K.LQVYEG  | 0.604563646 | 0.94 | S413  | 0.96 |
| IPI00435422.1 | 26037  | SIPA1L1  | R.HSAS*P  | 0.373234869 | 0.98 | S1412 | 1.08 |
| IPI00435422.1 | 26037  | SIPA1L1  | R.TLS*DE  | 0.782390145 | 0.9  | S1564 | 1.02 |
| IPI00435422.1 | 26037  | SIPA1L1  | R.FLMPEA  | 0.604563646 | 0.98 | S162  | 0.97 |
| IPI00436632.1 | 25836  | NIPBL    | R.SPQPVC  | 0.684201094 | 0.94 | S280  | 1.02 |
| IPI00436632.1 | 25836  | NIPBL    | R.SPQPVC  | 0.684201094 | 0.94 | S284  | 1.02 |
| IPI00436632.1 | 25836  | NIPBL    | R.NAAS*FI | 0.346340474 | 0.9  | S269  | 1.08 |
| IPI00436632.1 | 25836  | NIPBL    | K.AAMYDI  | 0.296993866 | 0.96 | S350  | 1.16 |
| IPI00436632.1 | 25836  | NIPBL    | R.NAASFP  | 0.197661257 | 0.98 | S274  | 1.13 |
| IPI00436632.1 | 25836  | NIPBL    | K.AAMYDI  | 0.253322457 | 0.98 | S350  | 1.1  |
| IPI00436632.1 | 25836  | NIPBL    | R.DVPPDII | 0.296993866 | 0.88 | S318  | 0.98 |

|               |               |           |             |            |      |
|---------------|---------------|-----------|-------------|------------|------|
| IPI00436632.1 | 25836 NIPBL   | K.AITSLLC | 0.566916624 | 1 S2658    | 1.03 |
| IPI00436705.6 | 23515 MORC3   | R.RLS*SQ  | 0.03637398  | 0.71 S561  | 1.04 |
| IPI00438230.1 | 10155 TRIM28  | R.LQEKLS  | 0.069007875 | 0.64 S670  | 0.69 |
| IPI00438230.1 | 10155 TRIM28  | R.LAS*PS  | 0.054409842 | 0.85 S512  | 1.1  |
| IPI00438230.1 | 10155 TRIM28  | R.STAPSA  | 0.373234869 | 0.94 S50   | 0.9  |
| IPI00438230.1 | 10155 TRIM28  | R.GAAAAA  | 0.27446972  | 1 T459     | 1.16 |
| IPI00438230.1 | 10155 TRIM28  | R.SRS*GE  | 0.530774648 | 0.98 S391  | 1.06 |
| IPI00438702.1 | 4152 MBD1     | R.LLPSVW  | 0.32093792  | 0.69 S376  | 0.94 |
| IPI00439415.5 | 1975 EIF4B    | R.VDVADC  | 0.32093792  | 0.81 S183  | 1.04 |
| IPI00439415.5 | 1975 EIF4B    | R.LPKSPP  | 0.088241621 | 0.77 Y96   | 1.03 |
| IPI00439415.5 | 1975 EIF4B    | R.LPKS*P  | 0.088241621 | 0.77 S93   | 1.03 |
| IPI00439415.5 | 1975 EIF4B    | K.EEDCHE  | 0.233505398 | 0.98 S462  | 1.15 |
| IPI00439415.5 | 1975 EIF4B    | K.EEDCHE  | 0.214968943 | 0.98 T461  | 1.15 |
| IPI00439415.5 | 1975 EIF4B    | K.SPPYTA  | 0.080258071 | 0.96 Y105  | 1.25 |
| IPI00439415.5 | 1975 EIF4B    | R.ERHPS*  | 0.096924105 | 0.94 S406  | 1.13 |
| IPI00439415.5 | 1975 EIF4B    | R.AAS*IFC | 0.106353987 | 0.77 S359  | 0.54 |
| IPI00439415.5 | 1975 EIF4B    | K.TIS*LTD | 0.854331471 | 0.79 S16   | 1.1  |
| IPI00439415.5 | 1975 EIF4B    | K.EEDCHE  | 0.152571688 | 1 S459     | 1.14 |
| IPI00439415.5 | 1975 EIF4B    | K.SLENET  | 0.072926818 | 0.96 S459  | 1.26 |
| IPI00439415.5 | 1975 EIF4B    | K.SLENET  | 0.072926818 | 0.98 T461  | 1.2  |
| IPI00439415.5 | 1975 EIF4B    | K.S*PPYT/ | 0.139636808 | 1 S93      | 1.23 |
| IPI00439415.5 | 1975 EIF4B    | K.SLENET  | 0.054409842 | 0.98 S462  | 1.29 |
| IPI00439415.5 | 1975 EIF4B    | K.S*PPYT/ | 0.566916624 | 0.98 S93   | 1.15 |
| IPI00439415.5 | 1975 EIF4B    | K.SPPY*T/ | 0.296993866 | 0.98 Y96   | 1.15 |
| IPI00439548.1 | 54880 BCOR    | R.RVS*KD  | 0.313968278 | 0.56 S1166 | 0.87 |
| IPI00439548.1 | 54880 BCOR    | R.QPVSEF  | 0.530774648 | 0.88 S1127 | 0.96 |
| IPI00439548.1 | 54880 BCOR    | R.KRPEPS  | 0.360667889 | 0.88 S1410 | 0.63 |
| IPI00440151.1 | 167227 DCP2   | R.HSQQLF  | 0.604563646 | 0.96 S284  | 1.16 |
| IPI00440241.2 | 79649 MAP7D3  | K.FTAILYR | 0.586469457 | 0.86 T148  | 0.88 |
| IPI00440241.2 | 79649 MAP7D3  | R.LSS*YTE | 2.74E-01    | 0.98 S448  | 1.19 |
| IPI00440241.2 | 79649 MAP7D3  | R.SAS*TEI | 3.28E-02    | 0.94 S184  | 1.02 |
| IPI00440502.1 | 6046 BRD2     | R.KADTTT  | 0.566916624 | 0.83 S298  | 0.94 |
| IPI00440502.1 | 6046 BRD2     | R.KADTTT  | 0.181528891 | 0.88 S301  | 1.26 |
| IPI00440502.1 | 6046 BRD2     | R.KADTTT  | 0.643675939 | 0.94 S298  | 1.05 |
| IPI00440502.1 | 6046 BRD2     | K.TAPPAL  | 0.32093792  | 0.94 S668  | 1.03 |
| IPI00440514.1 | 64764 CREB3L2 | K.IKLEPHE | 0.001613065 | 0.81 S191  | 2.08 |
| IPI00440688.3 | 84271 POLDIP3 | R.SS*PAAI | 0.431601138 | 0.85 S127  | 1.01 |
| IPI00440719.2 | 8260 ARD1A    | R.HVVLGA  | 0.066203153 | 0.55 S171  | 1.04 |
| IPI00440719.2 | 8260 ARD1A    | R.HVVLGA  | 0.166517367 | 0.94 S167  | 1.08 |
| IPI00440727.1 | 23476 BRD4    | R.SEPFS*I | 0.080258071 | 0.53 S1126 | 0.8  |
| IPI00440727.1 | 23476 BRD4    | K.MPDEPE  | 0.971449831 | 0.85 S470  | 0.78 |
| IPI00440727.1 | 23476 BRD4    | K.SKPPPT  | 0.530774648 | 1 Y599     | 1.03 |
| IPI00440727.1 | 23476 BRD4    | K.SKPPPT  | 0.197661257 | 0.96 S601  | 1    |
| IPI00440811.1 | 6787 NEK4     | R.ASGLLK  | 0.431601138 | 0.98 S340  | 1.04 |
| IPI00441964.1 | 116985 CENTD2 | R.ARLS*S/ | 0.197661257 | 1 S428     | 1.19 |
| IPI00441964.1 | 116985 CENTD2 | R.ARLSS*/ | 0.181528891 | 1 S429     | 1.19 |
| IPI00441964.1 | 116985 CENTD2 | R.LFPEFD  | 0.373234869 | 0.96 S229  | 1.18 |
| IPI00442073.4 | 1465 CSRP1    | K.GFGFGC  | 0.726073545 | 1 S192     | 1    |
| IPI00442077.1 | 156 ADRBK1    | R.IKMKQG  | 0.002581506 | 0.79 S98   | 1.75 |
| IPI00442167.3 | 121536 AEBP2  | R.LSPLPP  | 0.684201094 | 0.86 S24   | 0.83 |
| IPI00442167.3 | 121536 AEBP2  | R.RGS*LE  | 0.096380146 | 0.55 S206  | 0.5  |

|               |        |          |           |             |      |       |      |
|---------------|--------|----------|-----------|-------------|------|-------|------|
| IPI00442211.1 | 10152  | ABI2     | R.TLEPVR  | 0.530774648 | 0.94 | S210  | 1.04 |
| IPI00442379.1 |        |          | R.T*ETSPF | 0.000485008 | 0.98 | T43   | 1.51 |
| IPI00444329.1 | 593    | BCKDHA   | R.IGHHS*1 | 0.32093792  | 0.98 | S371  | 1.05 |
| IPI00444329.1 | 593    | BCKDHA   | R.IGHHST  | 0.233505398 | 0.92 | T372  | 1.2  |
| IPI00444329.1 | 593    | BCKDHA   | R.IGHHS*1 | 0.233505398 | 0.92 | S371  | 1.2  |
| IPI00444526.1 | 54815  | GATAD2A  | R.RPPSPC  | 0.296993866 | 0.12 | S107  | 0.52 |
| IPI00444526.1 | 54815  | GATAD2A  | R.RPPS*P  | 0.106353987 | 0.85 | S100  | 1.22 |
| IPI00444526.1 | 54815  | GATAD2A  | K.EATAQK  | 0.431601138 | 1    | T189  | 1.02 |
| IPI00444526.1 | 54815  | GATAD2A  | R.RPPS*P  | 0.346340474 | 0.96 | S100  | 1.06 |
| IPI00444526.1 | 54815  | GATAD2A  | R.RPPS*P  | 0.346340474 | 0.98 | S100  | 1.1  |
| IPI00444526.1 | 54815  | GATAD2A  | R.GLLASD  | 0.431601138 | 0.92 | T49   | 1.11 |
| IPI00444526.1 | 54815  | GATAD2A  | R.RPPS*P  | 0.181528891 | 0.74 | S100  | 0.83 |
| IPI00444572.2 | 57568  | SIPA1L2  | K.FSFYGN  | 0.868109485 | 0.92 | S1478 | 1.11 |
| IPI00444572.2 | 57568  | SIPA1L2  | K.YTIGDIF | 7.21E-09    | 0.64 | S148  | 2.21 |
| IPI00444572.2 | 57568  | SIPA1L2  | R.S*NSDV  | 0.9240167   | 0.85 | S160  | 0.87 |
| IPI00444656.4 | 9853   | RUSC2    | R.LSEGPA  | 0.985337202 | 0.88 | S536  | 0.83 |
| IPI00445113.1 | 84722  | PSRC1    | K.RES*PTC | 0.684201094 | 0.86 | S175  | 0.82 |
| IPI00445113.1 | 84722  | PSRC1    | K.RES*PTC | 0.84064003  | 0.96 | S175  | 1.01 |
| IPI00445113.1 | 84722  | PSRC1    | R.LSLGPL  | 0.197661257 | 0.67 | S70   | 0.8  |
| IPI00445199.1 |        |          | R.Y*PQGP  | 0.078322436 | 0.56 | Y49   | 0.55 |
| IPI00445335.1 | 286826 | LIN9     | R.LHYT*PF | 0.181528891 | 0.81 | T269  | 1.26 |
| IPI00445335.1 | 286826 | LIN9     | R.LHYTPP  | 0.566916624 | 0.9  | S274  | 1.14 |
| IPI00445357.1 |        |          | R.AIS*AA  | 0.431601138 | 0.98 | S66   | 1.23 |
| IPI00445387.1 | 85369  | FAM40A   | K.T*KFSS\ | 8.09E-11    | 0.76 | T124  | 4.77 |
| IPI00445429.1 | 22872  | SEC31A   | R.AQGEP\  | 0.296993866 | 0.98 | S532  | 1.06 |
| IPI00445658.2 | 170954 | KIAA1949 | R.LS*PGE  | 0.16091672  | 0.67 | S224  | 0.7  |
| IPI00445658.2 | 170954 | KIAA1949 | K.WRLS*P  | 0.296993866 | 1    | S195  | 1.07 |
| IPI00446175.1 | 159090 | FAM122B  | R.HSLLLS  | 0.106353987 | 0.92 | S62   | 1.42 |
| IPI00446175.1 | 159090 | FAM122B  | R.HSLLLS  | 0.106353987 | 0.92 | S63   | 1.42 |
| IPI00446175.1 | 159090 | FAM122B  | R.RNS*TTI | 0.296993866 | 0.64 | S50   | 1.09 |
| IPI00446175.1 | 159090 | FAM122B  | K.MFVSSS  | 0.296993866 | 0.81 | S160  | 1.1  |
| IPI00446175.1 | 159090 | FAM122B  | R.HSLLLS  | 0.152571688 | 1    | S64   | 1.19 |
| IPI00446175.1 | 159090 | FAM122B  | R.SSS*API | 0.214968943 | 0.98 | S25   | 1.16 |
| IPI00446175.1 | 159090 | FAM122B  | R.SSSAPL  | 0.373234869 | 0.98 | S33   | 1.28 |
| IPI00446175.1 | 159090 | FAM122B  | R.S*SSAPI | 0.197661257 | 0.98 | S23   | 1.28 |
| IPI00446175.1 | 159090 | FAM122B  | K.RIDFTP\ | 0.080258071 | 1    | S134  | 1.29 |
| IPI00446175.1 | 159090 | FAM122B  | K.RIDFTP\ | 0.080258071 | 1    | S134  | 1.29 |
| IPI00446280.1 | 57619  | SHROOM   | R.PGF AFC | 0.106353987 | 0.74 | S51   | 1.16 |
| IPI00446280.1 | 57619  | SHROOM   | R.DRPGS*  | 0.197661257 | 0.88 | S421  | 0.9  |
| IPI00446280.1 | 57619  | SHROOM   | R.DRPGS*  | 0.261301769 | 0.83 | S421  | 0.98 |
| IPI00446284.1 | 1643   | DDB2     | R.SRS*PLI | 0.530774648 | 0.98 | S26   | 1.2  |
| IPI00446435.1 | 57488  | FAM62B   | R.SSSS*LI | 0.060044376 | 0.96 | S146  | 1.16 |
| IPI00446435.1 | 57488  | FAM62B   | R.S*SSSLI | 0.214968943 | 0.96 | S143  | 1.09 |
| IPI00446435.1 | 57488  | FAM62B   | K.SHMS*G  | 0.566916624 | 0.98 | S98   | 1.05 |
| IPI00446435.1 | 57488  | FAM62B   | K.SHMSG   | 0.827038504 | 0.96 | S100  | 1    |
| IPI00446435.1 | 57488  | FAM62B   | K.SHMS*G  | 0.530774648 | 0.98 | S98   | 1.03 |
| IPI00446435.1 | 57488  | FAM62B   | K.SHMSG   | 0.98101429  | 0.74 | T108  | 1.16 |
| IPI00446435.1 | 57488  | FAM62B   | R.SSS*SLI | 0.401648339 | 0.98 | S145  | 1.03 |
| IPI00446435.1 | 57488  | FAM62B   | K.SHMS*G  | 0.858914691 | 0.98 | S98   | 1.06 |
| IPI00446435.1 | 57488  | FAM62B   | R.SS*SSLI | 0.401648339 | 0.98 | S144  | 1.02 |
| IPI00446435.1 | 57488  | FAM62B   | R.SSSLL   | 0.684201094 | 1    | S150  | 0.97 |

|               |        |          |           |             |      |       |      |
|---------------|--------|----------|-----------|-------------|------|-------|------|
| IPI00446435.1 | 57488  | FAM62B   | R.S*SSSLI | 0.346340474 | 1    | S143  | 0.97 |
| IPI00446735.1 | 55177  | FAM82C   | R.KDSL DL | 0.373234869 | 0.81 | S221  | 0.92 |
| IPI00446735.1 | 55177  | FAM82C   | R.KDS*LDI | 0.463105648 | 0.98 | S212  | 1.06 |
| IPI00446735.1 | 55177  | FAM82C   | R.KDSL DL | 0.431601138 | 0.04 | S225  | 0.17 |
| IPI00446735.1 | 55177  | FAM82C   | R.SQS*LPI | 0.214968943 | 1    | S46   | 1.17 |
| IPI00446735.1 | 55177  | FAM82C   | R.S*QSLPI | 0.214968943 | 1    | S44   | 1.17 |
| IPI00446866.1 | 2122   | EVI1     | K.SQSPLM  | 0.197661257 | 0.81 | T342  | 0.99 |
| IPI00446866.1 | 2122   | EVI1     | R.NFIGNS  | 0.643675939 | 0.98 | S860  | 1.12 |
| IPI00447051.1 | 9274   | BCL7C    | K.GTEPS*I | 0.858914691 | 1    | S114  | 0.91 |
| IPI00447051.1 | 9274   | BCL7C    | K.GTEPSP  | 0.566916624 | 0.98 | T118  | 0.92 |
| IPI00447589.1 | 84928  | FLJ14803 | R.TLDTFLI | 0.743182508 | 0.69 | S248  | 0.85 |
| IPI00448515.1 | 79657  | FLJ21908 | R.IKS*YDY | 0.029596689 | 0.96 | S87   | 1.31 |
| IPI00449144.1 | 10024  | TROAP    | R.NPLEEL  | 0.966004444 | 0.96 | S98   | 1.02 |
| IPI00449906.3 | 8874   | ARHGEF7  | K.SGTLKS  | 0.044561326 | 0.85 | S79   | 0.98 |
| IPI00449906.3 | 8874   | ARHGEF7  | R.MS*GFI\ | 0.604563646 | 1    | S340  | 1.05 |
| IPI00449906.3 | 8874   | ARHGEF7  | R.MS*GFI\ | 0.604563646 | 1    | S340  | 1.05 |
| IPI00449924.1 | 10743  | RAI1     | K.AGWGS\  | 0.346340474 | 0.98 | S869  | 1.11 |
| IPI00449924.1 | 10743  | RAI1     | K.AGWGS   | 0.346340474 | 0.98 | S874  | 1.11 |
| IPI00449924.1 | 10743  | RAI1     | K.APGASF  | 0.530774648 | 0.94 | S1315 | 1    |
| IPI00449924.1 | 10743  | RAI1     | K.APGASF  | 0.530774648 | 0.94 | S1311 | 1    |
| IPI00449924.1 | 10743  | RAI1     | K.APGASF  | 0.530774648 | 0.94 | S1313 | 1    |
| IPI00449924.1 | 10743  | RAI1     | R.TPEQYY  | 0.431601138 | 0.98 | S323  | 1.07 |
| IPI00450855.1 | 3159   | HMGA1    | R.KQPPKE  | 0.296993866 | 0.77 | T42   | 0.8  |
| IPI00453458.2 | 135112 | NCOA7    | K.STGHT*I | 0.886608864 | 0.92 | T358  | 0.82 |
| IPI00453458.2 | 135112 | NCOA7    | K.FNIT*PN | 0.387188711 | 0.96 | T134  | 0.85 |
| IPI00454912.1 | 9569   | GTF2IRD1 | R.SDKGS*  | 0.181528891 | 0.53 | S507  | 0.63 |
| IPI00455134.1 | 220988 | HNRPA3   | R.S*SGSP  | 0.373234869 | 1    | S333  | 1.06 |
| IPI00455134.1 | 220988 | HNRPA3   | R.SSGS*P  | 0.373234869 | 1    | S336  | 1.06 |
| IPI00455134.1 | 220988 | HNRPA3   | R.SS*GSP  | 0.373234869 | 1    | S334  | 1.06 |
| IPI00455183.2 | 84678  | FBXL10   | R.APKPPT  | 0.181528891 | 0.94 | T416  | 1.28 |
| IPI00455210.1 | 1108   | CHD4     | K.EDNS*E\ | 0.080258071 | 0.92 | S428  | 1.31 |
| IPI00455210.1 | 1108   | CHD4     | K.MS*QPG  | 0.25510468  | 0.98 | S1559 | 0.79 |
| IPI00455210.1 | 1108   | CHD4     | K.MSQPG\  | 0.239994114 | 0.98 | T1570 | 0.79 |
| IPI00455210.1 | 1108   | CHD4     | K.MSQPG\  | 0.087012535 | 1    | S1563 | 0.78 |
| IPI00455359.1 | 6311   | ATXN2    | R.MSSEGF  | 0.642010044 | 0.94 | S623  | 1.07 |
| IPI00455359.1 | 6311   | ATXN2    | K.RGPEVT  | 0.566916624 | 0.94 | S888  | 1.09 |
| IPI00455359.1 | 6311   | ATXN2    | K.GIS*PVV | 0.346340474 | 0.96 | S783  | 0.91 |
| IPI00455359.1 | 6311   | ATXN2    | R.QNSPAC  | 0.777986561 | 0.98 | T770  | 1.02 |
| IPI00455359.1 | 6311   | ATXN2    | K.RGPEVT  | 0.643675939 | 0.92 | S887  | 1.06 |
| IPI00455359.1 | 6311   | ATXN2    | K.GIS*PVV | 0.27446972  | 1    | S783  | 1.13 |
| IPI00455359.1 | 6311   | ATXN2    | K.ENIKPNI | 0.27446972  | 0.98 | T770  | 0.93 |
| IPI00455359.1 | 6311   | ATXN2    | K.RGPEVT  | 0.296993866 | 1    | S888  | 1.11 |
| IPI00455359.1 | 6311   | ATXN2    | R.T*SPSG\ | 0.373234869 | 0.98 | T665  | 1.19 |
| IPI00455359.1 | 6311   | ATXN2    | R.TS*PSG\ | 0.373234869 | 0.98 | S666  | 1.19 |
| IPI00455423.2 | 440577 | LOC44057 | K.CGSGP\  | 0.530774648 | 0.67 | S163  | 0.82 |
| IPI00455500.1 | 253260 | RICTOR   | R.ILNSLT* | 0.139636808 | 0.72 | T1103 | 0.77 |
| IPI00455500.1 | 253260 | RICTOR   | R.AQS*LK\ | 0.080258071 | 0.98 | S1302 | 1.16 |
| IPI00455500.1 | 253260 | RICTOR   | R.KHLWP\  | 0.643675939 | 0.62 | S1031 | 0.81 |
| IPI00455500.1 | 253260 | RICTOR   | K.HLWPV\  | 0.32093792  | 0.77 | S1028 | 1.16 |
| IPI00455500.1 | 253260 | RICTOR   | K.SNSVSL  | 0.980510506 | 0.88 | S1293 | 1.54 |
| IPI00455500.1 | 253260 | RICTOR   | R.KHLWP\  | 0.139636808 | 0.76 | S1030 | 0.94 |

|               |        |        |           |             |      |       |      |
|---------------|--------|--------|-----------|-------------|------|-------|------|
| IPI00455500.1 | 253260 | RICTOR | R.KHLWPA  | 0.139636808 | 0.76 | S1026 | 0.94 |
| IPI00455500.1 | 253260 | RICTOR | R.GRNDS*  | 0.604563646 | 0.88 | S21   | 1.37 |
| IPI00455502.1 | 91687  | CENPL  | R.KQSS*F  | 0.928728317 | 0.88 | S39   | 0.92 |
| IPI00455518.4 | 22880  | MORC2  | K.KLPLEV  | 0.066203153 | 0.96 | T603  | 1.25 |
| IPI00455518.4 | 22880  | MORC2  | K.KLPLEV  | 0.066203153 | 0.96 | S602  | 1.25 |
| IPI00455518.4 | 22880  | MORC2  | R.LMKPPS  | 0.03637398  | 0.9  | T864  | 0.98 |
| IPI00455518.4 | 22880  | MORC2  | K.TES*PIK | 0.373234869 | 0.98 | S725  | 1.16 |
| IPI00455518.4 | 22880  | MORC2  | K.T*ESPIK | 0.373234869 | 0.98 | T723  | 1.16 |
| IPI00455518.4 | 22880  | MORC2  | K.KTES*PI | 0.431601138 | 0.98 | S725  | 1.01 |
| IPI00455518.4 | 22880  | MORC2  | R.LMKPPS  | 0.32093792  | 0.72 | S861  | 0.97 |
| IPI00455518.4 | 22880  | MORC2  | K.KTES*PI | 0.116581414 | 0.98 | S725  | 1.2  |
| IPI00455518.4 | 22880  | MORC2  | R.PAPLVQ  | 0.952395062 | 0.96 | S696  | 1.01 |
| IPI00455518.4 | 22880  | MORC2  | R.LMKPPS  | 0.346340474 | 0.94 | S856  | 1.02 |
| IPI00455518.4 | 22880  | MORC2  | K.KTES*PI | 0.152571688 | 1    | S725  | 1.24 |
| IPI00455518.4 | 22880  | MORC2  | K.KT*ESPI | 0.296993866 | 1    | T723  | 1.1  |
| IPI00455518.4 | 22880  | MORC2  | R.PAPLVQ  | 0.684201094 | 1    | S698  | 1.06 |
| IPI00455518.4 | 22880  | MORC2  | R.S*PPLP/ | 0.214968943 | 1    | S615  | 1.17 |
| IPI00455541.3 |        |        | K.DSLITP/ | 0.829549043 | 0.88 | S666  | 0.99 |
| IPI00455541.3 |        |        | K.SALSLSI | 0.356956072 | 0.94 | S492  | 0.97 |
| IPI00455541.3 |        |        | K.AVVS*PI | 0.831562154 | 1    | S722  | 0.98 |
| IPI00455786.3 | 3983   | ABLIM1 | R.TSSESI\ | 0.152571688 | 0.96 | S282  | 1.2  |
| IPI00455786.3 | 3983   | ABLIM1 | R.NGLHRF  | 0.024009318 | 0.72 | T594  | 1.23 |
| IPI00455786.3 | 3983   | ABLIM1 | R.T*LSPTF | 0.368149744 | 0.92 | T353  | 1.03 |
| IPI00455982.1 | 10042  | HMG2L1 | K.ASSVGV  | 0.604563646 | 0.77 | S497  | 0.96 |
| IPI00456244.2 | 116987 | CENTG2 | R.FVLMAT  | 0.891255812 | 0.9  | T783  | 0.87 |
| IPI00456244.2 | 116987 | CENTG2 | R.LT*SQSI | 0.541395815 | 0.94 | T551  | 0.81 |
| IPI00456244.2 | 116987 | CENTG2 | R.LTS*QSI | 0.541395815 | 0.94 | S552  | 0.81 |
| IPI00456262.1 | 55690  | PACS1  | R.KLTSTS  | 0.011294655 | 0.98 | S322  | 1.34 |
| IPI00456262.1 | 55690  | PACS1  | K.TDLQGS  | 0.021601024 | 0.96 | S495  | 1.35 |
| IPI00456262.1 | 55690  | PACS1  | K.TDLQGS  | 0.044561326 | 0.98 | S493  | 1.34 |
| IPI00456262.1 | 55690  | PACS1  | K.TDLQGS  | 0.03637398  | 0.85 | S495  | 1.05 |
| IPI00456262.1 | 55690  | PACS1  | K.T*DLQG: | 0.040276449 | 0.98 | T488  | 1.34 |
| IPI00456262.1 | 55690  | PACS1  | K.TDLQGS  | 0.03637398  | 0.98 | S497  | 1.34 |
| IPI00456361.3 | 11273  | ATXN2L | R.MYPPRE  | 0.253322457 | 0.94 | S455  | 1.14 |
| IPI00456361.3 | 11273  | ATXN2L | K.TESVS*I | 0.12765804  | 0.96 | S604  | 1.06 |
| IPI00456361.3 | 11273  | ATXN2L | K.EKEVDC  | 0.928728317 | 0.98 | S600  | 1.04 |
| IPI00456361.3 | 11273  | ATXN2L | K.EKEVDC  | 0.928728317 | 0.98 | S589  | 1.04 |
| IPI00456361.3 | 11273  | ATXN2L | K.EVDGLL  | 0.804577835 | 0.98 | S600  | 1.05 |
| IPI00456361.3 | 11273  | ATXN2L | K.LQPSSS  | 0.233505398 | 0.85 | S565  | 1.09 |
| IPI00456361.3 | 11273  | ATXN2L | K.GPPQS*  | 0.296993866 | 1    | S111  | 1.11 |
| IPI00456534.1 | 145567 | TTC7B  | K.LPISSS* | 0.040276449 | 0.96 | S58   | 0.95 |
| IPI00456534.1 | 145567 | TTC7B  | K.LPISSST | 0.463105648 | 0.98 | T59   | 0.92 |
| IPI00456609.2 | 1540   | CYLD   | R.FHS*LPI | 0.643675939 | 0.85 | S415  | 1.03 |
| IPI00456620.1 | 7862   | BRPF1  | R.GAGWL:  | 0.971449831 | 0.98 | S1082 | 0.93 |
| IPI00456628.4 | 146206 | RLTPR  | R.LQRS*P' | 0.03637398  | 0.98 | S1347 | 1.24 |
| IPI00456631.5 | 23028  | AOF2   | K.KLPPPP  | 0.072926818 | 0.77 | S166  | 1.14 |
| IPI00456631.5 | 23028  | AOF2   | K.LPPPPP  | 0.060044376 | 0.86 | S166  | 1.13 |
| IPI00456677.1 | 81545  | FBXO38 | K.NKDVYF  | 0.764845588 | 0.96 | S724  | 0.97 |
| IPI00456677.1 | 81545  | FBXO38 | K.NKDVYF  | 0.764845588 | 0.96 | S722  | 0.97 |
| IPI00456681.4 | 6830   | SUPT6H | R.TRT*PA: | 0.001938901 | 0.96 | T1534 | 0.7  |
| IPI00456681.4 | 6830   | SUPT6H | R.TRTPAS  | 0.338692366 | 0.98 | S1537 | 0.77 |



|               |                |            |             |      |       |      |
|---------------|----------------|------------|-------------|------|-------|------|
| IPI00456681.4 | 6830 SUPT6H    | R.TRT*PA   | 0.536956757 | 0.98 | T1534 | 0.77 |
| IPI00456681.4 | 6830 SUPT6H    | R.T*RTPA   | 0.604820989 | 1    | T1532 | 0.83 |
| IPI00456681.4 | 6830 SUPT6H    | R.T*RTPA   | 0.233505398 | 0.96 | T1532 | 1.25 |
| IPI00456681.4 | 6830 SUPT6H    | R.TRT*PA   | 0.643675939 | 0.86 | T1534 | 0.79 |
| IPI00456681.4 | 6830 SUPT6H    | R.LTPRPS   | 0.373234869 | 0.96 | S1705 | 1.12 |
| IPI00456708.3 | 55125 CEP192   | K.GEVISS   | 0.296993866 | 0.85 | S1159 | 0.97 |
| IPI00456723.1 | 253959 GARNL1  | R.HFSQSE   | 0.497617381 | 0.92 | T778  | 1.09 |
| IPI00456723.1 | 253959 GARNL1  | R.HFS*QS   | 0.604563646 | 0.92 | S773  | 1.09 |
| IPI00456723.1 | 253959 GARNL1  | R.HFSQS*   | 0.32093792  | 0.98 | S775  | 1.14 |
| IPI00456723.1 | 253959 GARNL1  | R.S*SSTSI  | 0.005777772 | 0.96 | S795  | 1.38 |
| IPI00456723.1 | 253959 GARNL1  | R.RGS*SP   | 0.088241621 | 1    | S860  | 1.27 |
| IPI00456899.1 | 254225 RNF169  | R.VLS*PLI  | 0.643675939 | 0.77 | S403  | 1.12 |
| IPI00456899.1 | 254225 RNF169  | R.S*VSPE   | 0.401648339 | 0.88 | S366  | 1.07 |
| IPI00456899.1 | 254225 RNF169  | R.SVS*PE   | 0.586469457 | 0.96 | S368  | 1.09 |
| IPI00456899.1 | 254225 RNF169  | R.SVS*PE   | 0.942907226 | 0.98 | S368  | 1.04 |
| IPI00456919.2 | 10075 HUWE1    | R.S*HHAA   | 0.49616549  | 0.94 | S1084 | 0.93 |
| IPI00456919.2 | 10075 HUWE1    | R.ESQLAH   | 0.296993866 | 0.86 | S3919 | 1    |
| IPI00456919.2 | 10075 HUWE1    | R.REESPM   | 0.431601138 | 0.94 | S3816 | 1.12 |
| IPI00456919.2 | 10075 HUWE1    | K.ACS*PC   | 0.822525206 | 0.86 | S3373 | 1.03 |
| IPI00456970.1 | 8621 CDC2L5    | R.KDLSLG   | 0.011294655 | 0.85 | T1058 | 1.6  |
| IPI00456970.1 | 8621 CDC2L5    | K.IEHAPS*  | 0.197661257 | 0.94 | S525  | 1.08 |
| IPI00456970.1 | 8621 CDC2L5    | K.TKPLT*F  | 0.181528891 | 0.92 | T588  | 1.12 |
| IPI00456970.1 | 8621 CDC2L5    | K.QTDPST   | 0.651399605 | 0.94 | T1147 | 1.01 |
| IPI00456970.1 | 8621 CDC2L5    | K.QTDPS*   | 0.651399605 | 0.94 | S1146 | 1.01 |
| IPI00456970.1 | 8621 CDC2L5    | R.LYSSEE   | 0.008098758 | 0.98 | T871  | 0.98 |
| IPI00456970.1 | 8621 CDC2L5    | R.CLLADL   | 0.044561326 | 0.76 | S664  | 1.37 |
| IPI00456970.1 | 8621 CDC2L5    | R.GGDVS*   | 0.431601138 | 0.98 | S383  | 1.09 |
| IPI00456970.1 | 8621 CDC2L5    | R.ILELT*PI | 0.233505398 | 1    | T1246 | 1.17 |
| IPI00457110.1 | 55784 MCTP2    | R.RVS*SN   | 0.253322457 | 0.86 | S134  | 1.24 |
| IPI00464953.2 | 114793 FMNL2   | K.LLEQEA   | 3.57E-06    | 0.85 | S498  | 1.43 |
| IPI00464978.1 | 8660 IRS2      | R.SKSQSS   | 0.805160956 | 0.9  | T316  | 1.08 |
| IPI00464978.1 | 8660 IRS2      | K.RT*YSLT  | 0.431601138 | 0.96 | T577  | 1.04 |
| IPI00464978.1 | 8660 IRS2      | K.RTYS*L   | 0.431601138 | 0.96 | S579  | 1.04 |
| IPI00464978.1 | 8660 IRS2      | R.TAS*EG   | 0.096924105 | 0.96 | S367  | 1.2  |
| IPI00464978.1 | 8660 IRS2      | K.S*QSSG   | 0.431601138 | 0.92 | S308  | 1.18 |
| IPI00464978.1 | 8660 IRS2      | K.SQS*SG   | 0.431601138 | 0.92 | S310  | 1.18 |
| IPI00464978.1 | 8660 IRS2      | K.LLPNGD   | 0.049260986 | 0.86 | S774  | 1.5  |
| IPI00464978.1 | 8660 IRS2      | R.PVSVAC   | 0.813530126 | 0.88 | S393  | 1.24 |
| IPI00464978.1 | 8660 IRS2      | R.HS*SETI  | 0.03282354  | 0.94 | S1150 | 1.18 |
| IPI00464978.1 | 8660 IRS2      | R.TYS*LTI  | 0.604563646 | 0.96 | S579  | 0.96 |
| IPI00464978.1 | 8660 IRS2      | K.LLPNGD   | 0.886608864 | 0.96 | T778  | 0.87 |
| IPI00464999.1 | 63897 HEATR6   | K.KAPAGF   | 0.831562154 | 0.96 | S643  | 0.96 |
| IPI00465040.3 | 55722 CEP72    | R.GVTDTR   | 0.233505398 | 0.85 | S404  | 0.98 |
| IPI00465040.3 | 55722 CEP72    | K.LDLS*GE  | 0.373234869 | 0.92 | S318  | 0.98 |
| IPI00465040.3 | 55722 CEP72    | R.HLLS*PC  | 0.530774648 | 1    | S237  | 1.05 |
| IPI00465045.2 | 57609 DIP2B    | R.YRS*DIF  | 0.431601138 | 0.98 | S100  | 0.99 |
| IPI00465061.1 | 55683 FLJ10081 | K.TSGLPA   | 0.001001611 | 0.96 | S747  | 1.38 |
| IPI00465071.2 | 26000 TBC1D10E | R.QQPPLC   | 0.764845588 | 0.92 | S382  | 1    |
| IPI00465071.2 | 26000 TBC1D10E | R.AAGGAF   | 0.066203153 | 0.98 | S403  | 1.3  |
| IPI00465087.2 | 8314 BAP1      | K.SAS*NK   | 0.566916624 | 0.96 | S289  | 1.1  |
| IPI00465087.2 | 8314 BAP1      | K.GSSPSII  | 0.643675939 | 0.96 | S595  | 1.11 |

|               |                |           |             |      |       |      |
|---------------|----------------|-----------|-------------|------|-------|------|
| IPI00465087.2 | 8314 BAP1      | K.SASNKS  | 0.346340474 | 0.88 | S292  | 1.02 |
| IPI00465087.2 | 8314 BAP1      | K.S*ASNK  | 0.346340474 | 0.88 | S287  | 1.02 |
| IPI00465087.2 | 8314 BAP1      | K.GSS*PS  | 0.401648339 | 0.98 | S583  | 1.02 |
| IPI00465087.2 | 8314 BAP1      | K.GSSPSII | 0.401648339 | 1    | S597  | 1.09 |
| IPI00465087.2 | 8314 BAP1      | K.GSSPSII | 0.401648339 | 1    | S596  | 1.09 |
| IPI00465087.2 | 8314 BAP1      | K.GSS*PS  | 0.684201094 | 1    | S583  | 1.11 |
| IPI00465087.2 | 8314 BAP1      | R.SRPVVR  | 0.296993866 | 0.96 | S395  | 1.03 |
| IPI00465087.2 | 8314 BAP1      | R.VPVRPF  | 0.072926818 | 0.98 | S395  | 1.17 |
| IPI00465088.3 | 22893 BAHD1    | R.RLAS*LI | 0.007240509 | 0.69 | S121  | 0.81 |
| IPI00465100.1 | 64763 ZNF574   | R.APVASP  | 0.214968943 | 0.86 | S818  | 0.73 |
| IPI00465142.2 | 9847 KIAA0528  | K.TPNDGE  | 0.166517367 | 0.96 | S606  | 1.04 |
| IPI00465142.2 | 9847 KIAA0528  | K.NQTYSF  | 0.773594539 | 0.98 | S295  | 1.06 |
| IPI00465142.2 | 9847 KIAA0528  | K.LSSPAA  | 0.726073545 | 1    | S260  | 1.11 |
| IPI00465142.2 | 9847 KIAA0528  | R.AS*TDN  | 0.152571688 | 1    | S817  | 1.19 |
| IPI00465142.2 | 9847 KIAA0528  | R.AST*DN  | 0.139636808 | 1    | T818  | 1.19 |
| IPI00465151.1 | 80223 RAB11FIP | K.HLFSST  | 0.346340474 | 0.98 | S365  | 1.06 |
| IPI00465151.1 | 80223 RAB11FIP | K.TPLSQS  | 0.296993866 | 0.98 | S234  | 1.06 |
| IPI00465151.1 | 80223 RAB11FIP | R.RSS*LLS | 0.296993866 | 0.98 | S435  | 1.09 |
| IPI00465151.1 | 80223 RAB11FIP | R.NNMTAS  | 0.182552444 | 0.85 | S156  | 0.82 |
| IPI00465151.1 | 80223 RAB11FIP | K.DSGSDT  | 0.795669231 | 0.92 | S202  | 0.91 |
| IPI00465151.1 | 80223 RAB11FIP | K.DSGSDT  | 0.795669231 | 0.92 | S206  | 0.91 |
| IPI00465151.1 | 80223 RAB11FIP | K.HLFS*1  | 0.684201094 | 1    | S357  | 1.02 |
| IPI00465151.1 | 80223 RAB11FIP | K.HLFS*ST | 0.643675939 | 1    | S356  | 1.02 |
| IPI00465151.1 | 80223 RAB11FIP | K.HLFS*ST | 0.604563646 | 1    | S356  | 1.05 |
| IPI00465151.1 | 80223 RAB11FIP | K.HLFS*1  | 0.530774648 | 1    | S357  | 1.05 |
| IPI00465151.1 | 80223 RAB11FIP | K.HLFSST  | 0.463105648 | 1    | T358  | 1.05 |
| IPI00465151.1 | 80223 RAB11FIP | K.HLFSST  | 0.684201094 | 1    | T358  | 1.03 |
| IPI00465191.3 | 8021 NUP214    | R.NRDS*G  | 0.566916624 | 0.9  | S221  | 1.16 |
| IPI00465191.3 | 8021 NUP214    | R.PVAPSC  | 0.27446972  | 0.94 | T741  | 0.98 |
| IPI00465191.3 | 8021 NUP214    | R.SAQGS   | 0.410648733 | 0.74 | S95   | 0.96 |
| IPI00465200.2 | 9702 CEP57     | R.SPS*KP  | 0.966676636 | 0.98 | S55   | 1.08 |
| IPI00465288.2 | 6239 RREB1     | R.THS*GE  | 0.942907226 | 0.76 | S694  | 0.74 |
| IPI00465288.2 | 6239 RREB1     | K.DPNSAT  | 0.27446972  | 0.96 | S161  | 1.19 |
| IPI00465288.2 | 6239 RREB1     | K.FSPFLQ  | 0.510604444 | 0.88 | S1219 | 0.86 |
| IPI00465288.2 | 6239 RREB1     | K.FSPFLQ  | 0.9949766   | 0.88 | S1219 | 0.98 |
| IPI00465291.3 | 23235 SNF1LK2  | R.RAS*DT  | 0.106353987 | 0.92 | S587  | 1.33 |
| IPI00465294.2 | 988 CDC5L      | R.ILQEAQI | 0.818022374 | 0.77 | T373  | 1    |
| IPI00465294.2 | 988 CDC5L      | R.ILQEAQI | 0.881970624 | 0.94 | T377  | 0.94 |
| IPI00465294.2 | 988 CDC5L      | R.SGTT*PI | 0.604563646 | 0.96 | T430  | 0.97 |
| IPI00465294.2 | 988 CDC5L      | R.ILQEAQI | 0.49616549  | 0.92 | T377  | 1.07 |
| IPI00465294.2 | 988 CDC5L      | R.ILQEAQI | 0.84064003  | 0.92 | T377  | 0.91 |
| IPI00465294.2 | 988 CDC5L      | R.ILQEAQI | 0.9949766   | 0.96 | T373  | 0.91 |
| IPI00465294.2 | 988 CDC5L      | K.GGLNTE  | 0.431601138 | 0.98 | T396  | 1.09 |
| IPI00465345.1 | 25766 PRPF40B  | R.ELQQA   | 0.12765804  | 0.98 | S853  | 1.18 |
| IPI00465370.2 | 79596 C13orf7  | R.KIQSSL  | 0.32093792  | 0.9  | S719  | 1.05 |
| IPI00465370.2 | 79596 C13orf7  | R.LKAEVD  | 0.03282354  | 0.98 | S210  | 1.29 |
| IPI00465387.1 | 157313 CDCA2   | R.GS*PET  | 0.166517367 | 0.98 | S99   | 1.17 |
| IPI00465387.1 | 157313 CDCA2   | R.VASDS*  | 0.536956757 | 0.88 | S727  | 0.78 |
| IPI00465387.1 | 157313 CDCA2   | R.VAS*DS  | 0.536956757 | 0.88 | S725  | 0.78 |
| IPI00465427.2 | 7942 TFEB      | R.VHGLPT  | 4.54E-09    | 0.72 | S332  | 0.31 |
| IPI00465427.2 | 7942 TFEB      | R.VHGLPT  | 1.07E-07    | 0.9  | T331  | 0.37 |

|               |                 |            |             |            |      |
|---------------|-----------------|------------|-------------|------------|------|
| IPI00465427.2 | 7942 TFEB       | R.VHGLPT   | 8.19E-10    | 0.92 S334  | 0.38 |
| IPI00465427.2 | 7942 TFEB       | R.VHGLPT   | 7.32E-10    | 0.94 T330  | 0.46 |
| IPI00465427.2 | 7942 TFEB       | R.EDEGPF   | 0.878390339 | 0.96 S429  | 1.08 |
| IPI00465427.2 | 7942 TFEB       | R.EDEGPF   | 0.878390339 | 0.96 S423  | 1.08 |
| IPI00470461.3 | 58499 ZNF462    | R.NNSRV    | 0.708392237 | 0.9 S2172  | 0.83 |
| IPI00470461.3 | 58499 ZNF462    | K.S*PHNS   | 0.197661257 | 0.98 S350  | 1.07 |
| IPI00470461.3 | 58499 ZNF462    | K.VIIPS*PF | 0.818022374 | 0.96 S1747 | 0.95 |
| IPI00470461.3 | 58499 ZNF462    | R.KLANDF   | 0.054989367 | 0.77 S688  | 0.43 |
| IPI00470497.3 | 26135 SERBP1    | R.SS*FSH   | 0.233505398 | 0.13 S203  | 1.02 |
| IPI00470497.3 | 26135 SERBP1    | K.SKS*EE   | 0.253322457 | 0.92 S330  | 0.94 |
| IPI00470497.3 | 26135 SERBP1    | K.SKSEEA   | 0.214968943 | 0.94 S338  | 1.11 |
| IPI00470497.3 | 26135 SERBP1    | K.S*KSEE   | 0.214968943 | 0.94 S322  | 1.11 |
| IPI00470497.3 | 26135 SERBP1    | R.S*FSH    | 0.922292588 | 1 S202     | 0.95 |
| IPI00470497.3 | 26135 SERBP1    | R.GGSGSI   | 0.002900458 | 0.9 T226   | 1.59 |
| IPI00470497.3 | 26135 SERBP1    | R.GGSGSI   | 0.764845588 | 1 T232     | 0.96 |
| IPI00470497.3 | 26135 SERBP1    | R.GGSGSI   | 0.919312669 | 1 S234     | 0.93 |
| IPI00470523.4 | 387680 RP11-56A | K.GIWKPE   | 0.116581414 | 0.92 T829  | 0.96 |
| IPI00470523.4 | 387680 RP11-56A | K.ETVSEA   | 0.623338592 | 0.94 S622  | 0.95 |
| IPI00470523.4 | 387680 RP11-56A | K.HSDLFS   | 0.214968943 | 0.9 S679   | 1.11 |
| IPI00470523.4 | 387680 RP11-56A | K.RS*RPT   | 0.166517367 | 0.98 S178  | 1.23 |
| IPI00470523.4 | 387680 RP11-56A | K.RS*RPT   | 0.12765804  | 0.98 S178  | 1.23 |
| IPI00470523.4 | 387680 RP11-56A | R.S*HGLE   | 0.566916624 | 0.98 S890  | 1.2  |
| IPI00470523.4 | 387680 RP11-56A | K.ASALLF   | 0.746895813 | 0.55 S513  | 0.91 |
| IPI00470523.4 | 387680 RP11-56A | R.KS*PYG   | 0.373234869 | 0.9 S335   | 1    |
| IPI00470523.4 | 387680 RP11-56A | R.S*RPTS   | 0.181528891 | 0.94 S178  | 1.05 |
| IPI00470523.4 | 387680 RP11-56A | K.TVLS*LF  | 0.346340474 | 0.94 S696  | 1.31 |
| IPI00470523.4 | 387680 RP11-56A | R.RT*PSD   | 0.530774648 | 0.83 T225  | 0.98 |
| IPI00470523.4 | 387680 RP11-56A | R.RTPS*D   | 0.530774648 | 0.83 S227  | 0.98 |
| IPI00470523.4 | 387680 RP11-56A | R.AASGEL   | 0.545847833 | 0.85 S1008 | 0.86 |
| IPI00470523.4 | 387680 RP11-56A | K.GLFS*DI  | 0.296993866 | 0.96 S433  | 1.07 |
| IPI00470523.4 | 387680 RP11-56A | K.LTDEDF   | 0.530774648 | 0.98 S246  | 0.99 |
| IPI00470523.4 | 387680 RP11-56A | R.KSPYGF   | 0.401648339 | 0.96 T342  | 1.07 |
| IPI00470523.4 | 387680 RP11-56A | R.SRPTS*I  | 0.044561326 | 0.98 S182  | 1.27 |
| IPI00470594.1 | 26099 C1orf144  | R.ILGSAS   | 0.346340474 | 0.98 T121  | 1.06 |
| IPI00470594.1 | 26099 C1orf144  | R.ILGSAS*  | 0.181528891 | 0.98 S107  | 1.06 |
| IPI00470604.2 | 79651 RHBD2     | R.RQASLS   | 0.27446972  | 0.92 S86   | 1.16 |
| IPI00470604.2 | 79651 RHBD2     | R.RQAS*L   | 0.27446972  | 0.92 S84   | 1.16 |
| IPI00470604.2 | 79651 RHBD2     | R.GIPHSA   | 0.32093792  | 0.88 S325  | 0.95 |
| IPI00470604.2 | 79651 RHBD2     | R.GIPHS*   | 0.839313928 | 0.67 S323  | 0.66 |
| IPI00470610.3 | 29920 PYCR2     | R.VKLESP   | 0.822525206 | 0.96 S304  | 0.99 |
| IPI00470641.4 | 128061 C1orf131 | R.KS*ASSI  | 0.152571688 | 0.98 S86   | 1.19 |
| IPI00470641.4 | 128061 C1orf131 | K.NGTLIL   | 0.985337202 | 0.94 S279  | 0.95 |
| IPI00470672.1 | 9113 LATS1      | K.KQITTS*  | 0.253322457 | 0.55 S613  | 0.87 |
| IPI00470672.1 | 9113 LATS1      | K.KQITT*S  | 0.03637398  | 0.96 T612  | 1.26 |
| IPI00470711.2 | 23167 KIAA0143  | K.VPVFGT   | 0.32093792  | 0.83 S422  | 1    |
| IPI00470711.2 | 23167 KIAA0143  | R.IGPPSSI  | 0.049831638 | 0.76 T224  | 0.95 |
| IPI00470711.2 | 23167 KIAA0143  | R.IGPPS*   | 0.049831638 | 0.76 S220  | 0.95 |
| IPI00470711.2 | 23167 KIAA0143  | R.LSVPYV   | 0.566916624 | 0.98 S694  | 1.03 |
| IPI00470727.4 |                 | R.MNS*LT   | 0.088241621 | 0.98 S794  | 1.07 |
| IPI00470744.1 | 8505 PARG       | K.LENVSQ   | 0.011294655 | 0.88 S55   | 0.95 |
| IPI00470744.1 | 8505 PARG       | K.LENVSQ   | 0.011294655 | 0.88 T57   | 0.95 |

|               |        |          |            |             |      |       |      |
|---------------|--------|----------|------------|-------------|------|-------|------|
| IPI00470771.2 | 55095  | SAMD4B   | R.HALTS*F  | 0.528118232 | 0.83 | S607  | 1.01 |
| IPI00470771.2 | 55095  | SAMD4B   | K.GWAFG!   | 0.868109485 | 0.94 | S557  | 1.06 |
| IPI00470771.2 | 55095  | SAMD4B   | R.HALT*SF  | 0.523719116 | 1    | T606  | 0.9  |
| IPI00470779.2 | 200081 | TXLNA    | K.S*SPGQ   | 0.116581414 | 1    | S18   | 1.25 |
| IPI00470801.1 | 29028  | ATAD2    | R.LS*SAGI  | 0.684201094 | 0.9  | S166  | 1.17 |
| IPI00470801.1 | 29028  | ATAD2    | R.LSSAGP   | 0.233505398 | 0.98 | S172  | 1.12 |
| IPI00470811.3 | 54861  | SNRK     | K.MNIAS*F  | 0.764845588 | 0.81 | S518  | 1.03 |
| IPI00470931.1 | 257218 | SHPRH    | K.LHNSIIP  | 0.751731134 | 0.85 | S155  | 0.92 |
| IPI00472161.2 | 4798   | NFRKB    | R.SPS*PA'  | 0.116581414 | 0.86 | S228  | 1.1  |
| IPI00472162.1 | 730410 | LOC73041 | R.KSSGG!   | 0           | 0.76 | S351  | 5.71 |
| IPI00472303.1 | 3831   | KLC1     | R.ALSAS*!  | 0.726073545 | 1    | S618  | 1    |
| IPI00472303.1 | 3831   | KLC1     | R.S*RESLI  | 0.054409842 | 0.9  | S517  | 1.21 |
| IPI00472303.1 | 3831   | KLC1     | K.RASS*LI  | 0.181528891 | 1    | S587  | 1.2  |
| IPI00472303.1 | 3831   | KLC1     | K.RAS*SLI  | 0.106353987 | 1    | S586  | 1.2  |
| IPI00472303.1 | 3831   | KLC1     | R.ASS*LN)  | 0.116581414 | 0.98 | S587  | 1.25 |
| IPI00472332.1 | 653441 | LOC65344 | R.DLGNPN   | 1.46E-05    | 0.94 | T918  | 1.92 |
| IPI00472339.1 | 31     | ACACA    | K.EGSLS*!  | 0.214968943 | 0.66 | S50   | 0.89 |
| IPI00472339.1 | 31     | ACACA    | R.SSMS*G   | 0.088241621 | 0.92 | S80   | 1.05 |
| IPI00472339.1 | 31     | ACACA    | R.FIIGSVS  | 0.756144089 | 0.92 | S29   | 1.01 |
| IPI00472339.1 | 31     | ACACA    | R.IFDEVM)  | 0.604563646 | 0.74 | T1265 | 0.85 |
| IPI00472339.1 | 31     | ACACA    | R.IFDEVM)  | 0.373234869 | 0.74 | S1263 | 0.85 |
| IPI00472339.1 | 31     | ACACA    | R.MSFSSM   | 0.060044376 | 0.94 | Y1209 | 1.31 |
| IPI00472339.1 | 31     | ACACA    | R.MS*FSS   | 0.060044376 | 0.94 | S1201 | 1.31 |
| IPI00472339.1 | 31     | ACACA    | R.MSFSSM   | 0.060044376 | 0.94 | Y1209 | 1.31 |
| IPI00472339.1 | 31     | ACACA    | R.IFDEVM)  | 0.014056191 | 0.61 | S1259 | 1.08 |
| IPI00472339.1 | 31     | ACACA    | R.FIIGS*V! | 0.566916624 | 0.9  | S23   | 1.28 |
| IPI00472339.1 | 31     | ACACA    | R.FIIGS*V! | 0.296993866 | 0.98 | S23   | 1.1  |
| IPI00472540.1 | 10174  | SORBS3   | R.HPSSPS   | 0.139636808 | 0.98 | S205  | 1.13 |
| IPI00472540.1 | 10174  | SORBS3   | R.HPSS*P!  | 0.296993866 | 0.98 | S203  | 1.12 |
| IPI00472540.1 | 10174  | SORBS3   | R.HPSS*P!  | 0.900575286 | 0.83 | S203  | 1.02 |
| IPI00472540.1 | 10174  | SORBS3   | R.LKFDFQ   | 0.566916624 | 0.98 | S53   | 1.05 |
| IPI00472540.1 | 10174  | SORBS3   | R.HPSS*P!  | 0.152571688 | 0.98 | S203  | 1.21 |
| IPI00472540.1 | 10174  | SORBS3   | R.HPSSPS   | 0.12765804  | 0.98 | S205  | 1.23 |
| IPI00472540.1 | 10174  | SORBS3   | R.SPADPT   | 0.32093792  | 1    | S221  | 1.18 |
| IPI00472540.1 | 10174  | SORBS3   | R.SPADPT   | 0.743182508 | 0.98 | S221  | 1.06 |
| IPI00472738.1 | 221150 | C13orf3  | K.S*PRSP!  | 0.463105648 | 0.98 | S70   | 1.11 |
| IPI00472738.1 | 221150 | C13orf3  | K.SPRS*P!  | 0.463105648 | 0.98 | S73   | 1.11 |
| IPI00472779.1 | 288    | ANK3     | R.RQSFAE   | 0.181528891 | 0.98 | S1462 | 1.19 |
| IPI00472779.1 | 288    | ANK3     | R.RQS*FA   | 0.116581414 | 0.98 | S1459 | 1.19 |
| IPI00472779.1 | 288    | ANK3     | K.IHGSGH   | 0.732417704 | 0.76 | S4298 | 0.36 |
| IPI00472789.2 |        |          | R.EDALDC   | 0.853966795 | 0.96 | S266  | 0.86 |
| IPI00472789.2 |        |          | R.LLPVINT  | 0.86862174  | 0.94 | S733  | 0.88 |
| IPI00472789.2 |        |          | R.LLLDIPL  | 0.113558743 | 0.96 | T168  | 0.89 |
| IPI00472901.2 | 55636  | CHD7     | R.TPFKDE   | 0.463105648 | 0.79 | S1874 | 0.9  |
| IPI00472901.2 | 55636  | CHD7     | R.NIPS*PC  | 0.764845588 | 0.92 | S2559 | 0.92 |
| IPI00472981.3 | 56259  | CTNNBL1  | K.EYAENI   | 0.756144089 | 0.96 | S358  | 1.13 |
| IPI00472988.2 | 7080   | TITF1    | K.AAQQQL   | 0.881970624 | 0.92 | S284  | 0.93 |
| IPI00473037.2 | 171023 | ASXL1    | K.TDPAGL   | 0.970843959 | 0.77 | T469  | 1.11 |
| IPI00473037.2 | 171023 | ASXL1    | R.AS*ASPI  | 5.03E-09    | 0.55 | S501  | 0.48 |
| IPI00473136.3 | 1495   | CTNNA1   | R.LLEPLV   | 0.98101429  | 0.96 | T38   | 0.85 |
| IPI00473136.3 | 1495   | CTNNA1   | R.TPEELD   | 0.773594539 | 1    | S641  | 0.99 |

|               |                 |           |             |            |      |
|---------------|-----------------|-----------|-------------|------------|------|
| IPI00477098.1 | 9807 IHPK1      | K.HLDMVL  | 0.431601138 | 0.96 S212  | 1.1  |
| IPI00477152.5 | 6935 ZEB1       | R.IHS*GEK | 0.771113571 | 0.79 S243  | 0.9  |
| IPI00477152.5 | 6935 ZEB1       | K.TSQCSS  | 0.233505398 | 0.98 S293  | 1.12 |
| IPI00477152.5 | 6935 ZEB1       | K.TSQCSS  | 0.197661257 | 0.98 S295  | 1.15 |
| IPI00477152.5 | 6935 ZEB1       | K.TSQCSS  | 0.197661257 | 0.98 S293  | 1.15 |
| IPI00477230.4 | 23269 MGA       | K.VVNANC  | 0.373234869 | 0.94 S18   | 0.95 |
| IPI00477230.4 | 23269 MGA       | K.NTSGLP  | 0.233505398 | 0.9 S3011  | 0.99 |
| IPI00477230.4 | 23269 MGA       | K.NTSGLP  | 0.233505398 | 0.9 T3015  | 0.99 |
| IPI00477230.4 | 23269 MGA       | K.GLPFYA  | 0.795419436 | 0.92 S1457 | 0.97 |
| IPI00477230.4 | 23269 MGA       | K.WLPSS*  | 0.684201094 | 0.96 S449  | 1.05 |
| IPI00477230.4 | 23269 MGA       | K.SILPYPV | 0.530774648 | 0.98 S924  | 1.06 |
| IPI00477242.1 | 23644 EDC4      | R.T*RSPI  | 0.139636808 | 0.81 T727  | 1.09 |
| IPI00477242.1 | 23644 EDC4      | K.GPGQVF  | 0.181528891 | 0.83 S723  | 0.98 |
| IPI00477242.1 | 23644 EDC4      | R.TRSPDV  | 0.054409842 | 0.71 S741  | 1.03 |
| IPI00477242.1 | 23644 EDC4      | K.GPGQVF  | 0.166517367 | 0.96 S725  | 1.15 |
| IPI00477242.1 | 23644 EDC4      | R.TRS*PI  | 0.106353987 | 0.98 S729  | 1.2  |
| IPI00477330.1 | 9824 ARHGAP1    | R.RINS*LL | 0.373234869 | 0.96 S847  | 1.06 |
| IPI00477330.1 | 9824 ARHGAP1    | R.RQS*VG  | 0.32093792  | 0.98 S285  | 1.07 |
| IPI00477335.1 | 5187 PER1       | R.KEPVVG  | 0.703604632 | 0.96 S704  | 0.64 |
| IPI00477335.1 | 5187 PER1       | R.KEPVVG  | 0.703604632 | 0.96 T702  | 0.64 |
| IPI00477428.1 | 84456 L3MBTL3   | R.LSGEMF  | 0.604563646 | 0.58 S583  | 0.66 |
| IPI00477428.1 | 84456 L3MBTL3   | R.LSGEMF  | 0.604563646 | 0.58 S585  | 0.66 |
| IPI00477436.8 |                 | R.LKNDSC  | 0.800118017 | 0.9 S597   | 1.06 |
| IPI00477468.1 | 9646 CTR9       | K.KGGEFL  | 0.566916624 | 0.98 T925  | 1.03 |
| IPI00477477.3 | 9859 CEP170     | K.SIKS*DV | 0.054409842 | 0.79 S359  | 0.91 |
| IPI00477477.3 | 9859 CEP170     | R.SS*GSL  | 0.463105648 | 0.98 S464  | 1.09 |
| IPI00477477.3 | 9859 CEP170     | R.TPLTS*/ | 0.401648339 | 0.98 S1059 | 1.21 |
| IPI00477477.3 | 9859 CEP170     | R.TWS*RC  | 8.59E-05    | 0.59 S1283 | 1.5  |
| IPI00477477.3 | 9859 CEP170     | K.QKS*EE  | 0.886608864 | 0.92 S446  | 1.05 |
| IPI00477498.2 |                 | K.VS*IVSK | 0.116581414 | 1 S1150    | 1.17 |
| IPI00477498.2 |                 | R.NQKNS*  | 0.004600913 | 0.92 S589  | 1.14 |
| IPI00477498.2 |                 | K.NIIEATH | 0.00181541  | 0.74 S970  | 1.2  |
| IPI00477498.2 |                 | R.KS*VSS  | 0.029596689 | 0.98 S1070 | 1.17 |
| IPI00477498.2 |                 | R.AGS*PL  | 0.116581414 | 0.96 S975  | 1.24 |
| IPI00477498.2 |                 | R.TSFSVG  | 0.152571688 | 1 S1179    | 1.17 |
| IPI00477498.2 |                 | K.SVS*SSI | 0.12765804  | 0.96 S1072 | 1.19 |
| IPI00477526.2 | 221960 C7orf28B | R.HIEPEL/ | 0.684201094 | 0.94 S267  | 1.13 |
| IPI00477535.4 | 2073 ERCC5      | R.NAPAAV  | 0.72279082  | 0.88 S384  | 1.07 |
| IPI00477535.4 | 2073 ERCC5      | K.LKTEKE  | 0.253322457 | 0.98 T338  | 1.14 |
| IPI00477535.4 | 2073 ERCC5      | K.LKTEKE  | 0.233505398 | 0.98 S341  | 1.14 |
| IPI00477620.1 | 23255 KIAA0802  | R.GRS*PS  | 0.152571688 | 0.96 S1493 | 1.22 |
| IPI00477620.1 | 23255 KIAA0802  | R.VLHS*PI | 0.139636808 | 0.98 S1195 | 1.22 |
| IPI00477620.1 | 23255 KIAA0802  | K.SLYGDV  | 0.530774648 | 0.92 S189  | 1.22 |
| IPI00477642.3 | 4330 MN1        | R.KLS*QN  | 0.566916624 | 0.92 S863  | 1    |
| IPI00477661.1 | 80829 ZFP91     | R.SS*PSAI | 0.197661257 | 0.96 S83   | 1.12 |
| IPI00477661.1 | 80829 ZFP91     | R.S*SPSAI | 0.197661257 | 1 S82      | 1.2  |
| IPI00477661.1 | 80829 ZFP91     | R.SSPS*AI | 0.197661257 | 1 S85      | 1.2  |
| IPI00477803.3 | 10992 SF3B2     | R.GSDS*P  | 0.214968943 | 0.64 S362  | 0.89 |
| IPI00477803.3 | 10992 SF3B2     | R.GS*DSP  | 0.32093792  | 0.66 S360  | 0.92 |
| IPI00477876.3 | 8470 SORBS2     | K.SSILQHE | 0.430690939 | 0.98 Y253  | 0.85 |
| IPI00477876.3 | 8470 SORBS2     | R.PASLYQ  | 0.951462987 | 0.92 S260  | 1.04 |

|               |                 |           |             |      |       |      |
|---------------|-----------------|-----------|-------------|------|-------|------|
| IPI00477876.3 | 8470 SORBS2     | K.SFTSSS  | 0.346340474 | 0.98 | S451  | 1.17 |
| IPI00477876.3 | 8470 SORBS2     | K.SSILQHE | 0.609435295 | 0.96 | S251  | 0.83 |
| IPI00477876.3 | 8470 SORBS2     | R.T*SPGR  | 0.956313787 | 0.45 | T298  | 0.57 |
| IPI00477876.3 | 8470 SORBS2     | K.SSILQHE | 0.849082022 | 0.96 | S256  | 0.88 |
| IPI00477876.3 | 8470 SORBS2     | R.VGIFPIS | 0.726073545 | 0.94 | T543  | 0.96 |
| IPI00477876.3 | 8470 SORBS2     | R.TSPGRV  | 0.936890791 | 1    | S308  | 0.92 |
| IPI00477897.1 | 30011 SH3KBP1   | R.ANS*PS  | 0.566916624 | 0.94 | S550  | 0.93 |
| IPI00477901.1 |                 | K.GIS*ASS | 0.431601138 | 0.59 | S1487 | 0.82 |
| IPI00477923.1 | 1822 ATN1       | K.RAPS*P  | 0.000160239 | 0.64 | S640  | 1.65 |
| IPI00477923.1 | 1822 ATN1       | K.TAS*PP  | 0.726073545 | 0.9  | S627  | 0.84 |
| IPI00477944.1 |                 | R.LLELKS' | 0.116581414 | 0.86 | S2460 | 1.18 |
| IPI00477944.1 |                 | R.LLELKS' | 0.116581414 | 0.86 | T2462 | 1.18 |
| IPI00477982.1 | 6195 RPS6KA1    | R.GFS*FV  | 0.346340474 | 0.94 | S389  | 1.15 |
| IPI00477982.1 | 6195 RPS6KA1    | R.AENGLL  | 0.03637398  | 0.88 | T582  | 1.24 |
| IPI00477982.1 | 6195 RPS6KA1    | K.AY*SFC  | 0.401648339 | 0.83 | Y229  | 1.08 |
| IPI00477982.1 | 6195 RPS6KA1    | R.AENGLL  | 0.166517367 | 0.96 | T582  | 1.17 |
| IPI00477982.1 | 6195 RPS6KA1    | R.AENGLL  | 0.026666866 | 0.96 | Y585  | 1.25 |
| IPI00477982.1 | 6195 RPS6KA1    | K.AYS*FC  | 0.166517367 | 0.76 | S230  | 1.13 |
| IPI00478085.2 | 399664 RKHD1    | R.HS*PTLF | 0.139636808 | 0.22 | S514  | 0.53 |
| IPI00478191.2 | 54434 SSH1      | K.PAPENL  | 0.31051834  | 0.94 | S730  | 1.08 |
| IPI00478191.2 | 54434 SSH1      | K.SEAAPA  | 0.214968943 | 0.96 | S582  | 1.14 |
| IPI00478191.2 | 54434 SSH1      | K.SEAAPA  | 0.373234869 | 0.94 | S585  | 1.06 |
| IPI00478208.2 | 645296 hCG_2004 | R.INPYMS  | 0.971449831 | 0.96 | S142  | 0.73 |
| IPI00478214.2 | 653489 RGPDP3   | K.HSTPSP  | 0.045978168 | 0.86 | Y786  | 0.75 |
| IPI00478214.2 | 653489 RGPDP3   | K.DSLITP  | 0.829549043 | 0.88 | S1473 | 0.99 |
| IPI00478214.2 | 653489 RGPDP3   | K.HSTPS*I | 0.032806498 | 0.96 | S782  | 0.72 |
| IPI00478214.2 | 653489 RGPDP3   | K.SALSLSI | 0.356956072 | 0.94 | S1299 | 0.97 |
| IPI00478214.2 | 653489 RGPDP3   | R.EDALDC  | 0.853966795 | 0.96 | S1270 | 0.86 |
| IPI00478214.2 | 653489 RGPDP3   | R.LLLDIPL | 0.113558743 | 0.96 | T1172 | 0.89 |
| IPI00478214.2 | 653489 RGPDP3   | K.AVVS*PI | 0.831562154 | 1    | S1529 | 0.98 |
| IPI00478230.1 | 5929 RBBP5      | -.MNLELLE | 0.000115247 | 0.98 | S8    | 0.48 |
| IPI00478280.3 | 57708 MIER1     | R.RVNS*N  | 0.684201094 | 0.98 | S500  | 1.12 |
| IPI00478280.3 | 57708 MIER1     | R.RVNSNC  | 0.296993866 | 0.96 | S505  | 1.17 |
| IPI00478280.3 | 57708 MIER1     | R.RVNS*N  | 0.27446972  | 0.96 | S500  | 1.17 |
| IPI00478300.2 | 26065 LSM14A    | K.SPT*ME  | 0.011294655 | 0.72 | T194  | 1.06 |
| IPI00478300.2 | 26065 LSM14A    | K.S*PTME  | 0.014056191 | 0.86 | S192  | 1.12 |
| IPI00478300.2 | 26065 LSM14A    | R.SPVS*TI | 0.214968943 | 1    | S219  | 1.17 |
| IPI00478300.2 | 26065 LSM14A    | R.SPVST*I | 0.214968943 | 1    | T220  | 1.17 |
| IPI00478300.2 | 26065 LSM14A    | R.S*PVSTI | 0.197661257 | 1    | S216  | 1.17 |
| IPI00478442.2 | 57142 RTN4      | K.RRGSS*  | 0.463105648 | 0.27 | S182  | 1.18 |
| IPI00478442.2 | 57142 RTN4      | K.RRGSS*S | 0.27446972  | 1    | S181  | 1.15 |
| IPI00478570.1 | 23328 SASH1     | R.RVS*QD  | 0.096924105 | 0.9  | S45   | 1.27 |
| IPI00478623.1 |                 | R.LPS*KEI | 0.296993866 | 0.92 | S708  | 0.96 |
| IPI00478623.1 |                 | R.LPS*KEI | 0.12765804  | 0.92 | S708  | 1.1  |
| IPI00478623.1 |                 | R.LPS*KEI | 0.12765804  | 0.92 | S708  | 1.1  |
| IPI00478623.1 |                 | K.RLS*LD  | 0.49616549  | 0.98 | S525  | 1.13 |
| IPI00478623.1 |                 | K.RLSLDS  | 0.49616549  | 0.98 | S528  | 1.13 |
| IPI00478623.1 |                 | K.TVS*PP  | 0.37570848  | 0.76 | S599  | 1.04 |
| IPI00478721.1 |                 | K.DFAKSK  | 2.14E-06    | 0.5  | S38   | 1.07 |
| IPI00478737.3 | 55159 RFWD3     | R.GSQAW   | 0.957149097 | 0.86 | S427  | 0.88 |
| IPI00478737.3 | 55159 RFWD3     | R.GSQAW   | 0.751811379 | 0.86 | S425  | 0.88 |

|               |                |            |             |      |       |      |
|---------------|----------------|------------|-------------|------|-------|------|
| IPI00478772.1 | 56905 C15orf39 | R.LS*EHS   | 0.932027377 | 0.85 | S455  | 1.12 |
| IPI00478772.1 | 56905 C15orf39 | K.EDARPF   | 0.782390145 | 0.64 | S496  | 0.9  |
| IPI00478977.1 | 4300 MLLT3     | K.TNNNQI   | 0.116581414 | 0.94 | S77   | 1.11 |
| IPI00479094.1 | 6764 ST5       | K.TASFGY   | 0.088526124 | 0.94 | S105  | 0.84 |
| IPI00479094.1 | 6764 ST5       | K.TASFGY   | 0.088526124 | 0.94 | S107  | 0.84 |
| IPI00479125.3 | 23380 SRGAP2   | K.TSPVVA   | 0.233505398 | 0.98 | S993  | 1.12 |
| IPI00479125.3 | 23380 SRGAP2   | K.TSPVVA   | 0.233505398 | 0.98 | S994  | 1.12 |
| IPI00479125.3 | 23380 SRGAP2   | K.STVS*E   | 0.463643297 | 0.96 | S427  | 0.8  |
| IPI00479125.3 | 23380 SRGAP2   | K.S*TVSE   | 0.463643297 | 0.96 | S424  | 0.8  |
| IPI00479125.3 | 23380 SRGAP2   | K.TSPVVA   | 0.6467005   | 0.98 | S990  | 0.93 |
| IPI00479191.1 | 3187 HNRPH1    | K.SNNVEM   | 0.975679369 | 0.85 | S104  | 1.08 |
| IPI00479191.1 | 3187 HNRPH1    | K.HTGPNS   | 0.800118017 | 0.83 | T107  | 1.15 |
| IPI00479191.1 | 3187 HNRPH1    | K.HTGPNS   | 0.32093792  | 1    | S104  | 1.09 |
| IPI00479229.1 | 6829 SUPT5H    | K.VVSISSE  | 0.172716899 | 0.56 | T1034 | 0.67 |
| IPI00479229.1 | 6829 SUPT5H    | R.DVTNFT   | 0.604563646 | 1    | S666  | 1.07 |
| IPI00479333.1 | 7405 UVRAG     | R.LQYKT*I  | 0.290257583 | 0.96 | T518  | 0.89 |
| IPI00479372.1 |                | K.SWQQT    | 0.912548374 | 0.83 | S725  | 1.12 |
| IPI00479372.1 |                | R.AHT*PLI  | 0.834430989 | 0.71 | T1350 | 0.64 |
| IPI00479372.1 |                | K.IISENS*I | 0.975679369 | 0.86 | S1385 | 1.05 |
| IPI00479498.2 | 50488 MINK1    | R.VGVSSK   | 0.463105648 | 0.98 | S762  | 1.05 |
| IPI00479498.2 | 50488 MINK1    | R.RNT*FIG  | 0.530774648 | 0.74 | T187  | 0.68 |
| IPI00479498.2 | 50488 MINK1    | R.NLLHAD   | 0.296993866 | 0.72 | S898  | 0.84 |
| IPI00479498.2 | 50488 MINK1    | R.VGVSSK   | 0.32093792  | 1    | S757  | 1.1  |
| IPI00479498.2 | 50488 MINK1    | R.RNTFIG   | 0.834430989 | 0.88 | T191  | 1.14 |
| IPI00479498.2 | 50488 MINK1    | R.SDSVLP   | 0.373234869 | 1    | S743  | 1.09 |
| IPI00479509.2 |                | R.NYQQN    | 0.684201094 | 1    | S161  | 1.07 |
| IPI00479587.2 | 284403 WDR62   | R.AGTGYA   | 0.000205322 | 0.86 | S393  | 1.25 |
| IPI00479587.2 | 284403 WDR62   | R.AGT*GY   | 0.000205322 | 0.86 | T389  | 1.25 |
| IPI00479587.2 | 284403 WDR62   | R.AGTGY*   | 0.000205322 | 0.86 | Y391  | 1.25 |
| IPI00479587.2 | 284403 WDR62   | R.HHFETL   | 0.026666866 | 0.88 | S319  | 1.21 |
| IPI00479587.2 | 284403 WDR62   | R.WSEPW    | 0.401648339 | 0.66 | S654  | 0.8  |
| IPI00479587.2 | 284403 WDR62   | R.FATSLP   | 0.060044376 | 0.96 | S297  | 1.25 |
| IPI00479587.2 | 284403 WDR62   | R.RPSS*V   | 0.233505398 | 0.96 | S498  | 1.15 |
| IPI00479587.2 | 284403 WDR62   | R.RPS*SV   | 0.233505398 | 0.96 | S497  | 1.15 |
| IPI00479614.3 | 5887 RAD23B    | K.QEKPAE   | 0.726073545 | 0.98 | S88   | 0.99 |
| IPI00479631.1 | 641 BLM        | K.DLDTS*I  | 9.73E-05    | 0.85 | S328  | 1.17 |
| IPI00479631.1 | 641 BLM        | K.KLEFSS   | 0.530774648 | 0.85 | S144  | 0.8  |
| IPI00479631.1 | 641 BLM        | K.ELNFSH   | 0.849757871 | 0.98 | S464  | 0.99 |
| IPI00479760.3 | 22848 AAK1     | R.I LSDVT* | 0.080258071 | 0.98 | T640  | 1.23 |
| IPI00479760.3 | 22848 AAK1     | K.AGQTQF   | 0.530774648 | 0.92 | T389  | 1.05 |
| IPI00479760.3 | 22848 AAK1     | K.VQTT*PI  | 0.530774648 | 1    | T606  | 1.03 |
| IPI00479760.3 | 22848 AAK1     | R.ILS*DVT  | 0.27446972  | 1    | S637  | 1.12 |
| IPI00479790.4 |                | R.RLS*ITS  | 0.197661257 | 0.85 | S1042 | 1.2  |
| IPI00479795.2 | 22911 WDR47    | R.LTHDAS   | 0.296993866 | 0.83 | T514  | 1.08 |
| IPI00479823.1 | 51773 RSF1     | R.VLPSEQ   | 0.152571688 | 0.88 | T1085 | 1.01 |
| IPI00479823.1 | 51773 RSF1     | R.LS*PIPE  | 0.096924105 | 0.92 | S352  | 1.15 |
| IPI00479823.1 | 51773 RSF1     | K.KTFLDK   | 0.530774648 | 0.96 | S352  | 1.1  |
| IPI00479823.1 | 51773 RSF1     | K.VGS*PLI  | 0.917421569 | 0.72 | S1107 | 0.94 |
| IPI00479823.1 | 51773 RSF1     | K.T*FLDK   | 0.346340474 | 0.98 | T342  | 1.1  |
| IPI00479823.1 | 51773 RSF1     | K.SVTPT*P  | 0.92716125  | 0.96 | T158  | 0.97 |
| IPI00479823.1 | 51773 RSF1     | K.SVT*PT   | 0.92716125  | 0.96 | T156  | 0.97 |

|               |        |         |           |             |      |       |      |
|---------------|--------|---------|-----------|-------------|------|-------|------|
| IPI00479823.1 | 51773  | RSF1    | K.TFLDKD  | 0.373234869 | 1    | S352  | 1.04 |
| IPI00479823.1 | 51773  | RSF1    | K.DAQRLS  | 0.197661257 | 0.98 | S352  | 1.12 |
| IPI00479823.1 | 51773  | RSF1    | K.STLESE  | 0.49616549  | 0.94 | S370  | 1.06 |
| IPI00479823.1 | 51773  | RSF1    | K.STLESE  | 0.49616549  | 1    | S370  | 1.08 |
| IPI00479824.2 | 473    | RERE    | K.EEALDD  | 0.03637398  | 0.76 | S838  | 1.09 |
| IPI00479824.2 | 473    | RERE    | K.LPDLQP  | 0.346340474 | 0.88 | S36   | 1.08 |
| IPI00479971.3 | 55209  | SETD5   | R.GHPTQ   | 0.280412571 | 0.81 | S751  | 0.92 |
| IPI00480042.2 | 259266 | ASPM    | K.VPLSNE  | 0.604563646 | 0.61 | S425  | 0.78 |
| IPI00480052.1 | 5774   | PTPN3   | K.SS*SSV  | 8.31E-08    | 0.85 | S178  | 0.29 |
| IPI00480054.2 | 55035  | NOL8    | R.SDSSGL  | 0.873506301 | 0.98 | S597  | 1.01 |
| IPI00480122.3 | 9698   | PUM1    | K.AVLWQI  | 0.836096036 | 0.92 | S19   | 0.94 |
| IPI00480122.3 | 9698   | PUM1    | R.SASSAS  | 0.32093792  | 0.66 | S547  | 0.99 |
| IPI00480122.3 | 9698   | PUM1    | R.SASSAS  | 0.32093792  | 0.66 | S544  | 0.99 |
| IPI00480141.2 | 23370  | ARHGEF1 | R.SLS*PIL | 0.072926818 | 0.98 | S945  | 1.27 |
| IPI00480141.2 | 23370  | ARHGEF1 | R.RAETFA  | 0.286954617 | 0.94 | S575  | 1.13 |
| IPI00480157.1 | 9972   | NUP153  | K.RIPS*IV | 0.431601138 | 0.71 | S330  | 1.04 |
| IPI00480157.1 | 9972   | NUP153  | K.EGSVLD  | 0.800118017 | 0.79 | S614  | 1.02 |
| IPI00480157.1 | 9972   | NUP153  | K.IDSVAA  | 0.643675939 | 0.88 | S633  | 0.84 |
| IPI00480157.1 | 9972   | NUP153  | R.IPSIVSS | 0.00181541  | 0.76 | T348  | 1    |
| IPI00480157.1 | 9972   | NUP153  | K.NVFSSS  | 0.726073545 | 1    | S1463 | 1.01 |
| IPI00480157.1 | 9972   | NUP153  | R.IPSIVSS | 0.431601138 | 0.96 | S334  | 1.09 |
| IPI00480157.1 | 9972   | NUP153  | R.SVYFKP  | 0.604563646 | 1    | T388  | 1.01 |
| IPI00480157.1 | 9972   | NUP153  | K.NTSLPP  | 0.684201094 | 0.81 | S209  | 0.99 |
| IPI00480157.1 | 9972   | NUP153  | K.VQMTSF  | 0.40669332  | 0.9  | S518  | 1.17 |
| IPI00480205.1 |        |         | R.TAVDGF  | 0.008098758 | 0.79 | T230  | 1.11 |
| IPI00480205.1 |        |         | R.T*AVDG  | 0.008098758 | 0.79 | T207  | 1.11 |
| IPI00480205.1 |        |         | R.TAVDGF  | 0.008098758 | 0.79 | S214  | 1.11 |
| IPI00480205.1 |        |         | K.GYDSEC  | 0.062876365 | 0.86 | T92   | 1.02 |
| IPI00480205.1 |        |         | K.GYDS*E  | 0.727601611 | 0.94 | S88   | 1.1  |
| IPI00480205.1 |        |         | K.GY*DSE  | 0.727601611 | 0.94 | Y86   | 1.1  |
| IPI00480205.1 |        |         | R.TAVDGF  | 0.139636808 | 0.98 | S216  | 1.19 |
| IPI00513736.1 | 55929  | DMAP1   | K.DTIIDVV | 0.463105648 | 0.96 | T445  | 1.04 |
| IPI00513743.1 | 10808  | HSPH1   | K.IES*PKL | 0.152571688 | 0.81 | S768  | 1.12 |
| IPI00513773.1 | 284119 | PTRF    | R.KS*FTPI | 2.57E-09    | 0.53 | S210  | 1.35 |
| IPI00513773.1 | 284119 | PTRF    | K.SFT*PDI | 0.373234869 | 0.98 | T212  | 1.13 |
| IPI00513791.1 | 85440  | DOCK7   | R.MNS*LT  | 0.088241621 | 0.98 | S1383 | 1.07 |
| IPI00513791.1 | 85440  | DOCK7   | R.TTS*GD  | 0.253322457 | 0.86 | S452  | 1.15 |
| IPI00513791.1 | 85440  | DOCK7   | R.SAVRPA  | 0.253322457 | 0.98 | S888  | 1.2  |
| IPI00513791.1 | 85440  | DOCK7   | R.SLS*NSI | 0.049260986 | 0.94 | S898  | 1.21 |
| IPI00513803.3 | 10746  | MAP3K2  | R.T*QGTS  | 0.000429319 | 0.96 | T290  | 1.26 |
| IPI00513803.3 | 10746  | MAP3K2  | R.TQGTSL  | 0.000429319 | 0.96 | S297  | 1.26 |
| IPI00513803.3 | 10746  | MAP3K2  | R.DRS*SP  | 0.029596689 | 0.98 | S163  | 1.26 |
| IPI00513803.3 | 10746  | MAP3K2  | R.DRSS*P  | 0.024009318 | 0.98 | S164  | 1.25 |
| IPI00513803.3 | 10746  | MAP3K2  | R.AQS*YP  | 0.166517367 | 0.88 | S239  | 1.23 |
| IPI00513811.1 | 10767  | HBS1L   | K.SANPPH  | 0.858851798 | 0.96 | T231  | 0.9  |
| IPI00513811.1 | 10767  | HBS1L   | K.KQTMGF  | 0.136867371 | 0.56 | S182  | 0.47 |
| IPI00513965.3 | 9202   | ZMYM4   | R.KKS*IVA | 0.214968943 | 0.98 | S1092 | 1.14 |
| IPI00514071.2 | 23139  | MAST2   | R.RWS*LA  | 0.214968943 | 0.86 | S230  | 1.36 |
| IPI00514071.2 | 23139  | MAST2   | R.KLS*NPI | 0.296993866 | 0.98 | S74   | 1.26 |
| IPI00514073.2 | 55187  | VPS13D  | K.SLSLAS  | 0.604563646 | 0.88 | S2697 | 0.92 |
| IPI00514073.2 | 55187  | VPS13D  | R.AQS*PV  | 0.810035043 | 0.83 | S1047 | 0.96 |



|               |                |           |             |            |      |
|---------------|----------------|-----------|-------------|------------|------|
| IPI00514073.2 | 55187 VPS13D   | R.S*LPSHI | 0.463105648 | 0.96 S1729 | 1.17 |
| IPI00514073.2 | 55187 VPS13D   | K.SLSLAS  | 0.643675939 | 0.96 T2693 | 1.04 |
| IPI00514073.2 | 55187 VPS13D   | K.NLSFDIF | 0.577359743 | 0.79 S1043 | 0.93 |
| IPI00514106.3 | 221496 LEMD2   | R.AEPWLS  | 0.12765804  | 0.88 Y98   | 1.15 |
| IPI00514106.3 | 221496 LEMD2   | R.WWAAS   | 0.373234869 | 0.86 S166  | 1.16 |
| IPI00514106.3 | 221496 LEMD2   | R.WTKPSS  | 0.756144089 | 0.94 S460  | 1.07 |
| IPI00514127.1 | 3068 HDGF      | R.AGDLE   | 0.181528891 | 1 S181     | 1.16 |
| IPI00514135.1 |                | R.KT*SDAI | 0.431601138 | 0.24 T21   | 0.96 |
| IPI00514135.1 |                | R.RKTSDA  | 0.49616549  | 0.96 S33   | 1.12 |
| IPI00514135.1 |                | R.KTS*DAI | 0.530774648 | 1 S22      | 0.98 |
| IPI00514135.1 |                | R.KTSDAN  | 0.698823319 | 0.94 T27   | 1.05 |
| IPI00514135.1 |                | R.RKTS*D  | 0.401648339 | 1 S22      | 1.05 |
| IPI00514135.1 |                | R.RKT*SD  | 0.32093792  | 1 T21      | 1.05 |
| IPI00514135.1 |                | K.T*SDANI | 0.684201094 | 0.98 T21   | 1.09 |
| IPI00514135.1 |                | K.TS*DANI | 0.684201094 | 0.98 S22   | 1.09 |
| IPI00514135.1 |                | R.RKTSDA  | 0.346340474 | 0.98 T27   | 1.09 |
| IPI00514209.2 | 96459 FNIP1    | R.NKS*SLI | 0.001743493 | 0.96 S565  | 0.6  |
| IPI00514221.2 |                | R.GREDS   | 0.684201094 | 0.86 T958  | 1.06 |
| IPI00514311.1 | 55917 CTTNBP2I | K.VSSPLS  | 0.233505398 | 0.81 S563  | 1.02 |
| IPI00514311.1 | 55917 CTTNBP2I | R.DLS*PTL | 0.03637398  | 0.86 S488  | 1.12 |
| IPI00514398.1 | 83990 BRIP1    | R.HFNYP   | 0.519333664 | 0.62 T113  | 1.03 |
| IPI00514689.1 | 149986 LSM14B  | R.GAGFP   | 0.780826721 | 0.96 S74   | 0.92 |
| IPI00514705.2 | 253725 FAM21C  | K.HSDLFS  | 0.214968943 | 0.9 S785   | 1.11 |
| IPI00514705.2 | 253725 FAM21C  | K.RS*RPT  | 0.166517367 | 0.98 S284  | 1.23 |
| IPI00514705.2 | 253725 FAM21C  | K.RS*RPT  | 0.12765804  | 0.98 S284  | 1.23 |
| IPI00514705.2 | 253725 FAM21C  | R.KS*PYG  | 0.373234869 | 0.9 S441   | 1    |
| IPI00514705.2 | 253725 FAM21C  | R.S*RPTS  | 0.181528891 | 0.94 S284  | 1.05 |
| IPI00514705.2 | 253725 FAM21C  | K.TVLS*LF | 0.346340474 | 0.94 S802  | 1.31 |
| IPI00514705.2 | 253725 FAM21C  | K.GLFS*DI | 0.27446972  | 0.94 S539  | 1.17 |
| IPI00514705.2 | 253725 FAM21C  | R.RT*PSD  | 0.530774648 | 0.83 T331  | 0.98 |
| IPI00514705.2 | 253725 FAM21C  | R.RTPS*D  | 0.530774648 | 0.83 S333  | 0.98 |
| IPI00514705.2 | 253725 FAM21C  | K.LTDEDF  | 0.530774648 | 0.98 S352  | 0.99 |
| IPI00514705.2 | 253725 FAM21C  | R.KSPYGF  | 0.401648339 | 0.96 T448  | 1.07 |
| IPI00514705.2 | 253725 FAM21C  | R.SRPTS*I | 0.044561326 | 0.98 S288  | 1.27 |
| IPI00514825.1 | 9722 NOS1AP    | K.VSHPQE  | 0.684201094 | 1 S266     | 1    |
| IPI00515006.1 | 64769 C1orf149 | K.REPGSC  | 0.27446972  | 0.77 S125  | 1.03 |
| IPI00515049.2 | 154043 CNKSR3  | K.SAILDLY | 0.233505398 | 0.9 S130   | 1.11 |
| IPI00515090.1 | 64802 NMNAT1   | K.LEASDC  | 0.92716125  | 0.94 T119  | 0.95 |
| IPI00515090.1 | 64802 NMNAT1   | K.LEASDC  | 0.912548374 | 0.52 S117  | 0.68 |
| IPI00549229.1 | 6867 TACC1     | K.ASYHFS  | 0.346340474 | 0.74 T80   | 0.87 |
| IPI00549232.4 | 22862 FNDC3A   | K.MSS*PP  | 0.643675939 | 0.96 S203  | 1.05 |
| IPI00549248.3 | 4869 NPM1      | K.T*PKGP  | 0.32093792  | 0.86 T237  | 0.96 |
| IPI00549248.3 | 4869 NPM1      | K.DELHIVE | 0.49616549  | 0.64 S70   | 0.88 |
| IPI00549248.3 | 4869 NPM1      | -.MEDS*MI | 0.463105648 | 0.74 S4    | 0.93 |
| IPI00549248.3 | 4869 NPM1      | K.MSVQP   | 0.431601138 | 0.92 S88   | 1.14 |
| IPI00549248.3 | 4869 NPM1      | K.QEKT*PI | 0.643675939 | 0.98 T234  | 1.02 |
| IPI00549248.3 | 4869 NPM1      | K.MSVQP   | 0.166517367 | 0.06 T95   | 0.07 |
| IPI00549248.3 | 4869 NPM1      | K.DELHIVE | 0.764845588 | 0.64 Y67   | 0.73 |
| IPI00549248.3 | 4869 NPM1      | K.DELHIVE | 0.684201094 | 0.41 T75   | 0.55 |
| IPI00549248.3 | 4869 NPM1      | K.T*PKT*P | 0.804577835 | 1 T234     | 1.01 |
| IPI00549248.3 | 4869 NPM1      | K.DELHIVE | 0.769214181 | 0.13 S70   | 0.37 |

|               |        |         |           |             |      |       |      |
|---------------|--------|---------|-----------|-------------|------|-------|------|
| IPI00549248.3 | 4869   | NPM1    | R.TVSLGA  | 0.933447376 | 0.05 | S70   | 0.19 |
| IPI00549248.3 | 4869   | NPM1    | R.TVSLGA  | 0.791231585 | 0.06 | T78   | 0.1  |
| IPI00549248.3 | 4869   | NPM1    | R.TVSLGA  | 0.463105648 | 0.41 | S70   | 0.56 |
| IPI00549248.3 | 4869   | NPM1    | R.TVSLGA  | 0.760488858 | 0.03 | Y67   | 0.13 |
| IPI00549248.3 | 4869   | NPM1    | K.CGSGP\  | 0.530774648 | 0.67 | S125  | 0.82 |
| IPI00549248.3 | 4869   | NPM1    | R.TVSLGA  | 0.726073545 | 0.02 | T75   | 0.08 |
| IPI00549248.3 | 4869   | NPM1    | K.DELHIVE | 0.995403769 | 0.14 | T78   | 0.38 |
| IPI00549342.2 | 8241   | RBM10   | K.LASDDR  | 0.253322457 | 1    | S646  | 1.14 |
| IPI00549380.1 | 54487  | DGCR8   | R.EQSSDL  | 0.000787564 | 0.92 | S373  | 2.08 |
| IPI00549380.1 | 54487  | DGCR8   | R.LLIDPNC | 0.463105648 | 1    | S92   | 1.07 |
| IPI00549380.1 | 54487  | DGCR8   | R.LLIDPNC | 0.463105648 | 1    | S95   | 1.07 |
| IPI00549516.3 | 114034 | TOE1    | R.ATSEVP  | 0.346340474 | 0.94 | S428  | 1.07 |
| IPI00549517.1 | 22994  | AZI1    | R.SGSPRF  | 0.002581506 | 0.76 | T96   | 1.15 |
| IPI00549517.1 | 22994  | AZI1    | R.SGSPRF  | 0.40669332  | 0.81 | T93   | 0.67 |
| IPI00549517.1 | 22994  | AZI1    | R.S*GSPR  | 0.401648339 | 0.98 | S87   | 1.1  |
| IPI00549517.1 | 22994  | AZI1    | R.S*GSPR  | 0.009818709 | 0.52 | S87   | 0.63 |
| IPI00549561.2 | 79047  | KCTD15  | R.SPVS*PI | 0.463105648 | 0.92 | S38   | 1.06 |
| IPI00549561.2 | 79047  | KCTD15  | R.S*PVSPI | 0.346340474 | 0.98 | S35   | 1.1  |
| IPI00549736.3 | 84164  | ASCC2   | R.GRLT*P  | 0.233505398 | 0.88 | T233  | 1.15 |
| IPI00549786.4 | 84335  | AKT1S1  | R.LNT*SDI | 0.727601611 | 0.96 | T246  | 0.89 |
| IPI00549786.4 | 84335  | AKT1S1  | K.S*LPVS\ | 0.245972641 | 1    | S183  | 0.75 |
| IPI00549858.4 | 5127   | PCTK1   | K.RLS*LP/ | 0.49616549  | 0.98 | S125  | 1.33 |
| IPI00549858.4 | 5127   | PCTK1   | K.LTLNS*F | 0.12765804  | 1    | S144  | 1.24 |
| IPI00549858.4 | 5127   | PCTK1   | K.LT*LNSF | 0.12765804  | 1    | T141  | 1.24 |
| IPI00549858.4 | 5127   | PCTK1   | R.RVS*LSI | 0.072926818 | 1    | S159  | 1.28 |
| IPI00549912.4 | 134957 | STXBP5  | R.KLS*LPT | 0.048845949 | 0.96 | S90   | 1.09 |
| IPI00549912.4 | 134957 | STXBP5  | R.KLSLPT  | 0.116581414 | 0.98 | T93   | 1.11 |
| IPI00549912.4 | 134957 | STXBP5  | R.KLS*LPT | 0.116581414 | 1    | S90   | 1.22 |
| IPI00550026.1 | 60313  | GPBP1L1 | R.RHNS*S  | 0.431601138 | 0.94 | S49   | 1.09 |
| IPI00550026.1 | 60313  | GPBP1L1 | R.ESAFTS  | 0.205975059 | 0.94 | S292  | 0.79 |
| IPI00550026.1 | 60313  | GPBP1L1 | R.HNS*SD  | 0.604563646 | 1    | S49   | 1.02 |
| IPI00550191.2 | 51759  | C9orf78 | R.VGDT*E  | 0.096924105 | 0.96 | T253  | 1.19 |
| IPI00550308.1 | 10137  | RBM12   | R.S*PHEA  | 0.296993866 | 0.72 | S424  | 0.92 |
| IPI00550468.2 | 26959  | HBP1    | R.RAS*LS  | 0.072926818 | 0.86 | S380  | 1.22 |
| IPI00550468.2 | 26959  | HBP1    | R.RASLS*  | 0.072926818 | 0.86 | S382  | 1.22 |
| IPI00550506.2 | 27237  | ARHGEF1 | R.HQS*FG  | 0.181528891 | 1    | S107  | 1.22 |
| IPI00550506.2 | 27237  | ARHGEF1 | K.GLGKPC  | 0.684201094 | 1    | S174  | 1.03 |
| IPI00550534.2 | 8028   | MLLT10  | R.GSLS*PI | 0.78568809  | 0.79 | S686  | 1.02 |
| IPI00550655.4 | 10927  | SPIN1   | R.IS*DAHL | 0.800118017 | 0.92 | S124  | 0.81 |
| IPI00550839.1 | 89796  | NAV1    | R.S*LGLAI | 0.726073545 | 0.86 | S1339 | 0.9  |
| IPI00550839.1 | 89796  | NAV1    | R.GGPRP\  | 2.09E-07    | 0.81 | S710  | 1.12 |
| IPI00550839.1 | 89796  | NAV1    | R.RNS*TIV | 0.096924105 | 0.96 | S465  | 1.25 |
| IPI00550839.1 | 89796  | NAV1    | K.TLSKS*E | 0.373234869 | 0.98 | S155  | 1.07 |
| IPI00550954.4 | 285761 | DCBLD1  | K.HSLS*SC | 0.604563646 | 0.94 | S436  | 1    |
| IPI00550987.1 | 9662   | CEP135  | R.DRSPS*  | 0.214968943 | 0.94 | S441  | 1.1  |
| IPI00550987.1 | 9662   | CEP135  | R.DRS*PS  | 0.166517367 | 1    | S439  | 1.16 |
| IPI00552169.1 | 8899   | PRPF4B  | K.LCDFGS  | 0.756144089 | 0.94 | Y338  | 0.94 |
| IPI00552288.1 | 79745  | CLIP4   | R.AS*AGLI | 0.00E+00    | 0.5  | S465  | 28.7 |
| IPI00552345.3 | 54521  | WDR44   | K.GKELSD  | 0.03637398  | 0.96 | S96   | 1.35 |
| IPI00552345.3 | 54521  | WDR44   | R.KRKS*E  | 0.253322457 | 0.83 | S262  | 1.09 |
| IPI00552345.3 | 54521  | WDR44   | K.YNTEGF  | 0.139636808 | 0.96 | S565  | 1.2  |

|               |                 |            |             |      |       |      |
|---------------|-----------------|------------|-------------|------|-------|------|
| IPI00552345.3 | 54521 WDR44     | K.YNTEGF   | 0.139636808 | 0.96 | S561  | 1.2  |
| IPI00552345.3 | 54521 WDR44     | R.TKEYVS   | 0.32093792  | 0.98 | S403  | 1.23 |
| IPI00552345.3 | 54521 WDR44     | K.RKS*ELI  | 0.373234869 | 0.98 | S262  | 1    |
| IPI00552365.3 | 79180 EFHD2     | R.ADLNQC   | 0.181528891 | 0.92 | S76   | 1.15 |
| IPI00552365.3 | 79180 EFHD2     | R.RADLNC   | 0.116581414 | 0.98 | S74   | 1.15 |
| IPI00552464.2 | 22978 NT5C2     | R.S*ISEIKF | 0.024009318 | 0.98 | S209  | 1.34 |
| IPI00552483.1 |                 | K.EEHGGL   | 0.346340474 | 1    | S79   | 1.13 |
| IPI00552502.5 |                 | R.ILEQQN   | 0.726073545 | 1    | T407  | 1    |
| IPI00552502.5 |                 | K.GQLTKS   | 0.01011525  | 0.96 | S315  | 1.1  |
| IPI00552530.2 | 5931 RBBP7      | K.IGEEQS   | 0.373234869 | 0.71 | S339  | 0.85 |
| IPI00552546.1 | 79892 C10orf119 | R.VSPSTS   | 0.566916624 | 0.92 | Y159  | 0.95 |
| IPI00552546.1 | 79892 C10orf119 | R.VSPSTS   | 0.566916624 | 0.92 | T160  | 0.95 |
| IPI00552546.1 | 79892 C10orf119 | R.VHS*PP   | 0.01011525  | 0.64 | S298  | 1.67 |
| IPI00552546.1 | 79892 C10orf119 | R.VS*PST   | 0.072926818 | 0.98 | S154  | 1.24 |
| IPI00552561.5 | 54856 GON4L     | R.KSTQPC   | 0.27446972  | 0.96 | S206  | 1.05 |
| IPI00552561.5 | 54856 GON4L     | R.KGEMPA   | 0.342305379 | 0.79 | S1957 | 0.73 |
| IPI00552700.2 | 84248 FYTTD1    | R.LVGATA   | 0.401648339 | 0.59 | S16   | 0.72 |
| IPI00552849.1 | 143684 FAM76B   | K.ISNLS*P  | 0.604563646 | 0.85 | S193  | 0.9  |
| IPI00552909.3 | 57187 THOC2     | K.IDTHPSF  | 0.665546864 | 0.79 | S1306 | 1.02 |
| IPI00552909.3 | 57187 THOC2     | K.IDTHPS*  | 0.373234869 | 0.96 | S1302 | 0.93 |
| IPI00552909.3 | 57187 THOC2     | K.TPVSGS   | 0.463105648 | 1    | S1278 | 1.05 |
| IPI00552909.3 | 57187 THOC2     | K.LYINHT*  | 0.604563646 | 1    | T1328 | 1.05 |
| IPI00552909.3 | 57187 THOC2     | K.GGEKT*   | 0.401648339 | 1    | T1270 | 1.09 |
| IPI00552988.4 | 8777 MPDZ       | R.IGVAKPI  | 0.89791754  | 0.98 | S790  | 0.95 |
| IPI00552988.4 | 8777 MPDZ       | R.TAPTAL   | 0.530774648 | 0.98 | S354  | 1.03 |
| IPI00552988.4 | 8777 MPDZ       | R.GSLPQL   | 0.431601138 | 0.98 | S230  | 1.01 |
| IPI00553014.3 | 10160 FARP1     | K.VS*AGE   | 0.637328432 | 0.81 | S123  | 0.9  |
| IPI00553014.3 | 10160 FARP1     | K.VSAGEF   | 0.431601138 | 0.98 | S427  | 1.06 |
| IPI00553014.3 | 10160 FARP1     | K.SSSPAP   | 0.152571688 | 0.94 | S903  | 1.07 |
| IPI00553014.3 | 10160 FARP1     | K.SSSPAP   | 0.152571688 | 0.94 | S902  | 1.07 |
| IPI00553014.3 | 10160 FARP1     | R.LGAPEN   | 0.643675939 | 1    | T24   | 1.03 |
| IPI00553043.1 | 22998 LIMCH1    | R.VHGS*P   | 0.401648339 | 0.92 | S601  | 0.83 |
| IPI00553043.1 | 22998 LIMCH1    | K.S*PEPE   | 0.197661257 | 0.98 | S718  | 1.13 |
| IPI00553067.2 | 55610 CCDC132   | K.FMEQSF   | 0.773594539 | 0.96 | S494  | 1.05 |
| IPI00553156.3 | 169792 GLIS3    | R.DAAAEC   | 0.827038504 | 0.98 | S545  | 1.02 |
| IPI00554494.1 | 54620 FBXL19    | R.S*PEPD   | 0.116581414 | 0.94 | S408  | 1.01 |
| IPI00554497.1 | 4810 NHS        | R.CSLVHS   | 0.426647605 | 0.79 | S210  | 1    |
| IPI00554497.1 | 4810 NHS        | R.ANS*FT   | 0.060044376 | 0.67 | S523  | 1.04 |
| IPI00554497.1 | 4810 NHS        | R.GQSIAA   | 0.072926818 | 0.88 | S301  | 1.11 |
| IPI00554497.1 | 4810 NHS        | K.NPIHNIP  | 0.773594539 | 1    | T154  | 0.98 |
| IPI00554497.1 | 4810 NHS        | R.ATT*PSL  | 0.773594539 | 0.9  | T819  | 1.03 |
| IPI00554521.1 | 2495 FTH1       | R.KMGAPF   | 0.990159288 | 0.94 | S179  | 0.94 |
| IPI00554521.1 | 2495 FTH1       | R.KMGAPF   | 0.990159288 | 0.94 | S183  | 0.94 |
| IPI00554711.1 | 3728 JUP        | K.RVS*VEI  | 0.905247537 | 0.85 | S664  | 0.64 |
| IPI00554729.1 | 4077 NBR1       | R.SLT*LD   | 0.373234869 | 0.96 | T658  | 1    |
| IPI00554729.1 | 4077 NBR1       | R.S*LTLD   | 0.373234869 | 0.96 | S656  | 1    |
| IPI00554774.1 | 8767 RIPK2      | K.MELSLN   | 0.394935546 | 0.86 | S220  | 0.86 |
| IPI00554824.1 | 151648 SGOL1    | K.TPTTTPI  | 0.006212563 | 0.64 | T433  | 0.47 |
| IPI00554824.1 | 151648 SGOL1    | R.RGDPFT   | 0.40669332  | 0.94 | S238  | 0.83 |
| IPI00554824.1 | 151648 SGOL1    | K.TPTTTPI  | 0.008541331 | 0.76 | S436  | 0.54 |
| IPI00555619.1 | 9326 ZNHIT3     | K.TVKPVE   | 0.116581414 | 0.88 | S80   | 1.03 |

|               |                 |            |             |            |      |
|---------------|-----------------|------------|-------------|------------|------|
| IPI00555619.1 | 9326 ZNHIT3     | K.TVKPVE   | 0.096924105 | 0.88 S73   | 1.03 |
| IPI00555619.1 | 9326 ZNHIT3     | K.TVKPVE   | 0.088241621 | 0.85 S80   | 0.95 |
| IPI00555619.1 | 9326 ZNHIT3     | K.TVKPVE   | 0.296993866 | 0.85 S88   | 1.06 |
| IPI00555651.1 | 2074 ERCC6      | R.NSNFSV   | 0.002042313 | 0.22 S1348 | 0.32 |
| IPI00555651.1 | 2074 ERCC6      | R.NSNFSV   | 0.002042313 | 0.96 S1345 | 1.27 |
| IPI00555659.3 | 79065 ATG9A     | R.SFS*PLC  | 0.32093792  | 0.76 S656  | 1.28 |
| IPI00555659.3 | 79065 ATG9A     | R.HPEPVF   | 0.604563646 | 0.88 S828  | 1.12 |
| IPI00555735.1 | 10277 UBE4B     | R.HLLNS*F  | 0.088241621 | 0.92 S1136 | 1.21 |
| IPI00555735.1 | 10277 UBE4B     | K.NNESQV   | 0.03282354  | 0.83 S674  | 0.88 |
| IPI00555735.1 | 10277 UBE4B     | R.SQSSEC   | 0.286954617 | 0.92 S90   | 1.15 |
| IPI00555735.1 | 10277 UBE4B     | R.SQSSEC   | 0.286954617 | 0.92 S88   | 1.15 |
| IPI00555819.1 | 441253 LOC44125 | R.S*SSMS   | 0.559279862 | 0.88 S368  | 0.95 |
| IPI00555819.1 | 441253 LOC44125 | R.SSS*MS   | 0.559279862 | 0.88 S370  | 0.95 |
| IPI00555868.1 | 3066 HDAC2      | R.MLPHAF   | 0.296993866 | 1 S394     | 1.12 |
| IPI00555917.2 | 5829 PXN        | K.TSSVSN   | 0.32093792  | 0.94 S106  | 1.18 |
| IPI00555917.2 | 5829 PXN        | K.TGSS*SI  | 0.800118017 | 0.96 S335  | 0.98 |
| IPI00555917.2 | 5829 PXN        | R.FIHQQP   | 0.738886535 | 1 S83      | 0.98 |
| IPI00555917.2 | 5829 PXN        | R.FIHQQP   | 0.643675939 | 1 S85      | 0.98 |
| IPI00556034.1 | 5936 RBM4       | K.LHVGNI   | 0.985337202 | 0.98 T88   | 1.05 |
| IPI00556038.2 |                 | R.KGEMPA   | 0.342305379 | 0.79 S795  | 0.73 |
| IPI00556086.2 | 2002 ELK1       | R.DLELPL   | 0.088241621 | 0.96 S324  | 1.26 |
| IPI00556248.1 | 51454 GULP1     | K.SPS*TDI  | 0.800118017 | 0.92 S213  | 1.14 |
| IPI00556277.1 |                 | K.LDIPTG1  | 0.066203153 | 0.94 T926  | 1.15 |
| IPI00556277.1 |                 | K.LDIPTG1  | 0.197661257 | 0.98 T925  | 1.12 |
| IPI00556348.1 | 10179 RBM7      | R.SFS*SPI  | 0.000110287 | 0.96 S136  | 1.65 |
| IPI00556350.1 | 80025 PANK2     | R.RAS*SA   | 0.32093792  | 0.96 S45   | 1.09 |
| IPI00556350.1 | 80025 PANK2     | R.DRLGS*   | 0.008303266 | 0.9 S66    | 0.88 |
| IPI00556350.1 | 80025 PANK2     | R.LGS*YS   | 0.214968943 | 0.98 S66   | 1.14 |
| IPI00556379.1 | 7023 TFAP4      | K.RFIQELS  | 0.431601138 | 1 S124     | 1.04 |
| IPI00556379.1 | 7023 TFAP4      | R.FIQELSC  | 0.976229102 | 0.92 S124  | 1.05 |
| IPI00556379.1 | 7023 TFAP4      | R.FIQELSC  | 0.827038504 | 1 S124     | 1.01 |
| IPI00556429.1 | 5347 PLK1       | R.KKTLCG   | 0.845194016 | 1 T214     | 0.96 |
| IPI00556429.1 | 5347 PLK1       | R.KKT*LC   | 0.831562154 | 1 T210     | 0.96 |
| IPI00556429.1 | 5347 PLK1       | R.KKTLCG   | 0.813530126 | 1 S224     | 0.98 |
| IPI00556456.1 | 10664 CTCF      | R.THS*GE   | 0.637328432 | 0.71 S74   | 0.82 |
| IPI00556456.1 | 10664 CTCF      | R.SHTGEF   | 0.836096036 | 0.96 S54   | 0.92 |
| IPI00556456.1 | 10664 CTCF      | R.SHT*GE   | 0.463105648 | 0.96 T46   | 0.97 |
| IPI00556458.1 | 51684 SUFU      | R.RLSGKC   | 0.27446972  | 0.67 T305  | 0.67 |
| IPI00556458.1 | 51684 SUFU      | R.APS*RK   | 0.181528891 | 0.9 S342   | 1.16 |
| IPI00556458.1 | 51684 SUFU      | R.APS*RK   | 0.643675939 | 0.56 S342  | 1.12 |
| IPI00556458.1 | 51684 SUFU      | R.APSRKC   | 0.072926818 | 0.98 S346  | 1.18 |
| IPI00556476.2 | 9156 EXO1       | K.KPLS*PA  | 0.021601024 | 0.96 S815  | 1.33 |
| IPI00556476.2 | 9156 EXO1       | R.TIS*PPT  | 0.373234869 | 0.92 S598  | 0.99 |
| IPI00556594.2 | 55596 ZCCHC8    | K.IHS*PIPI | 0.463105648 | 1 S658     | 1.05 |
| IPI00556594.2 | 55596 ZCCHC8    | K.KSEAGF   | 0.253322457 | 0.96 S601  | 1.05 |
| IPI00556594.2 | 55596 ZCCHC8    | K.KSEAGF   | 0.253322457 | 0.96 S598  | 1.05 |
| IPI00556594.2 | 55596 ZCCHC8    | R.GT*PPP'  | 0.116581414 | 0.98 T479  | 1.23 |
| IPI00556634.1 | 7709 ZBTB17     | K.THS*PLF  | 0.566916624 | 0.98 S357  | 0.99 |
| IPI00556634.1 | 7709 ZBTB17     | K.T*HSPLF  | 0.566916624 | 0.98 T355  | 0.99 |
| IPI00556645.2 | 221937 FOXK1    | R.SGGLQ1   | 0.572822052 | 0.88 T436  | 0.66 |
| IPI00556645.2 | 221937 FOXK1    | R.SGGLQ1   | 0.009034562 | 0.98 S441  | 0.59 |

|               |                |           |             |            |      |
|---------------|----------------|-----------|-------------|------------|------|
| IPI00556645.2 | 221937 FOXK1   | R.SGGLQ1  | 0.245972641 | 0.94 S441  | 0.72 |
| IPI00556645.2 | 221937 FOXK1   | R.SAPAS*I | 0.018808105 | 0.96 S420  | 0.58 |
| IPI00556645.2 | 221937 FOXK1   | R.S*APASI | 0.018808105 | 0.96 S416  | 0.58 |
| IPI00556645.2 | 221937 FOXK1   | K.EEAPAS  | 0.371919559 | 0.92 Y219  | 0.84 |
| IPI00556645.2 | 221937 FOXK1   | K.EEAPAS  | 0.096380146 | 0.98 S213  | 0.69 |
| IPI00556645.2 | 221937 FOXK1   | K.AAS*EQI | 0.138946285 | 0.58 S288  | 0.6  |
| IPI00556645.2 | 221937 FOXK1   | K.AASEQC  | 0.138946285 | 0.58 T294  | 0.6  |
| IPI00556645.2 | 221937 FOXK1   | R.S*APAS' | 0.878390339 | 0.88 S416  | 0.93 |
| IPI00556645.2 | 221937 FOXK1   | K.AAS*EQI | 0.119105559 | 0.53 S288  | 0.58 |
| IPI00556645.2 | 221937 FOXK1   | K.EEAPAS  | 0.368149744 | 0.96 S223  | 0.76 |
| IPI00556645.2 | 221937 FOXK1   | K.EEAPAS  | 0.368149744 | 0.96 S213  | 0.76 |
| IPI00604409.1 | 55072 RNF31    | R.RLS*API | 0.12765804  | 0.98 S315  | 1.18 |
| IPI00604489.1 |                | K.VSSPVA  | 0.643675939 | 0.92 S1420 | 1.09 |
| IPI00604489.1 |                | K.VSSPVA  | 0.831562154 | 0.96 S1417 | 1.11 |
| IPI00604489.1 |                | R.RAAS*D  | 0.197661257 | 0.94 S899  | 1.1  |
| IPI00604489.1 |                | K.VSSPVA  | 0.32093792  | 0.83 S1421 | 0.85 |
| IPI00604489.1 |                | K.SQSVPC  | 0.080258071 | 0.88 S742  | 1.07 |
| IPI00604489.1 |                | R.NYQSSS  | 0.002042313 | 0.71 T1139 | 0.95 |
| IPI00604489.1 |                | R.SYS*PYI | 0.346340474 | 0.98 S794  | 1.09 |
| IPI00604489.1 |                | R.HLGGSC  | 0.684201094 | 0.98 S1314 | 1.11 |
| IPI00604489.1 |                | K.SFS*AP/ | 0.829549043 | 0.98 S1048 | 1.03 |
| IPI00604489.1 |                | R.SYSPY*I | 0.32093792  | 1 Y796     | 1.14 |
| IPI00604489.1 |                | K.SQS*VP/ | 0.12765804  | 0.98 S733  | 1.23 |
| IPI00604489.1 |                | K.VSS*PV/ | 0.730331964 | 1 S1413    | 0.99 |
| IPI00604489.1 |                | K.VSS*PV/ | 0.684201094 | 0.98 S1413 | 1.05 |
| IPI00604489.1 |                | R.WDS*YC  | 0.530774648 | 1 S338     | 1.06 |
| IPI00604489.1 |                | K.EATSDP  | 0.152571688 | 0.98 T860  | 1.21 |
| IPI00604489.1 |                | K.EATSDP  | 0.152571688 | 0.98 S858  | 1.21 |
| IPI00604489.1 |                | K.VATTPG  | 0.373234869 | 1 S1269    | 1.12 |
| IPI00604489.1 |                | R.WDS*YC  | 0.088241621 | 0.92 S338  | 1.13 |
| IPI00604489.1 |                | K.EAFEEM  | 0.32093792  | 0.94 S963  | 1.06 |
| IPI00604489.1 |                | R.SGYIPSI | 0.32093792  | 0.98 T775  | 0.39 |
| IPI00604489.1 |                | R.NYQSSS  | 0.566916624 | 1 S1155    | 1.06 |
| IPI00604489.1 |                | R.NYQSSS  | 0.566916624 | 1 S1157    | 1.06 |
| IPI00604517.2 |                | R.LELQGP  | 0.818022374 | 1 S540     | 1    |
| IPI00604517.2 |                | K.KVVVSP  | 0.566916624 | 1 T69      | 1.05 |
| IPI00604517.2 |                | K.ALVAT*F | 0.756144089 | 1 T98      | 1    |
| IPI00604517.2 |                | K.KVVVS*I | 0.530774648 | 1 S67      | 1.05 |
| IPI00604547.2 | 55122 C6orf166 | R.TLDFDP  | 0.096924105 | 0.98 S21   | 1.32 |
| IPI00604547.2 | 55122 C6orf166 | R.TLDFDP  | 0.197661257 | 0.96 S21   | 1.29 |
| IPI00604582.1 | 57092 PCNP     | K.NIGRDT' | 0.566916624 | 0.9 T16    | 0.86 |
| IPI00604620.3 | 4691 NCL       | K.KVVVS*I | 0.106353987 | 0.77 S67   | 1    |
| IPI00604620.3 | 4691 NCL       | K.VAVAT*F | 0.530774648 | 0.94 T76   | 1.02 |
| IPI00604620.3 | 4691 NCL       | K.VVVSP   | 0.463105648 | 0.98 T69   | 1.01 |
| IPI00604620.3 | 4691 NCL       | R.LELQGP  | 0.818022374 | 1 S563     | 1    |
| IPI00604620.3 | 4691 NCL       | K.KVVVSP  | 0.566916624 | 1 T69      | 1.05 |
| IPI00604620.3 | 4691 NCL       | K.ALVAT*F | 0.756144089 | 1 T121     | 1    |
| IPI00604620.3 | 4691 NCL       | K.KVVVS*I | 0.530774648 | 1 S67      | 1.05 |
| IPI00604786.1 | 678 ZFP36L2    | R.RLS*DSI | 0.152571688 | 0.42 S441  | 0.59 |
| IPI00604786.1 | 678 ZFP36L2    | R.RLSDS*I | 0.296993866 | 0.9 S443   | 1.28 |
| IPI00607564.1 | 25800 SLC39A6  | K.YESQLS  | 0.03282354  | 0.96 S203  | 1.45 |

|               |       |          |            |             |      |       |      |
|---------------|-------|----------|------------|-------------|------|-------|------|
| IPI00607584.1 | 10514 | MYBBP1A  | K.VPAQAN   | 0.233505398 | 0.9  | T1227 | 1.08 |
| IPI00607584.1 | 10514 | MYBBP1A  | K.NQKPSC   | 0.9240167   | 0.81 | S1267 | 1.02 |
| IPI00607584.1 | 10514 | MYBBP1A  | K.RKS*ED   | 0.32093792  | 0.92 | S1186 | 1    |
| IPI00607584.1 | 10514 | MYBBP1A  | R.LSLVIRE  | 0.604563646 | 1    | S1308 | 0.98 |
| IPI00607584.1 | 10514 | MYBBP1A  | R.LSLVIRE  | 0.604563646 | 1    | S1310 | 0.98 |
| IPI00607584.1 | 10514 | MYBBP1A  | K.ALGGEC   | 0.431601138 | 0.96 | S775  | 1.12 |
| IPI00607589.1 | 23309 | SIN3B    | R.YVEQYV   | 0.530774648 | 0.86 | S971  | 0.95 |
| IPI00607589.1 | 23309 | SIN3B    | R.YVEQYV   | 0.684201094 | 0.94 | S969  | 0.99 |
| IPI00607628.2 | 56850 | GRIPAP1  | R.SLSSSF   | 0.152571688 | 0.98 | S661  | 1.15 |
| IPI00607638.3 | 2036  | EPB41L1  | K.HQAS*IN  | 0.804577835 | 0.98 | S401  | 0.96 |
| IPI00607638.3 | 2036  | EPB41L1  | R.SLPELD   | 0.088241621 | 0.86 | T543  | 0.95 |
| IPI00607638.3 | 2036  | EPB41L1  | R.SLPELD   | 0.088241621 | 0.86 | S541  | 0.95 |
| IPI00607775.1 | 4683  | NBN      | R.IPNYQL   | 0.530774648 | 0.94 | S350  | 1.07 |
| IPI00607834.2 |       |          | R.KPSAPS   | 0.431601138 | 0.86 | S12   | 0.97 |
| IPI00607875.1 | 84451 | KIAA1804 | K.DGHRIS   | 0.431601138 | 0.92 | S517  | 1.05 |
| IPI00607875.1 | 84451 | KIAA1804 | R.LRAIQCI  | 0           | 0.76 | S562  | 7.62 |
| IPI00607875.1 | 84451 | KIAA1804 | R.IS*LPSD  | 0.00082518  | 0.81 | S514  | 0.31 |
| IPI00619901.1 | 27115 | PDE7B    | R.RGS*YP   | 0.253322457 | 0.83 | S45   | 1.38 |
| IPI00619921.2 | 11083 | DIDO1    | R.GGLVGC   | 0.072926818 | 0.9  | S1617 | 0.99 |
| IPI00619921.2 | 11083 | DIDO1    | R.GGLVGC   | 0.054409842 | 0.9  | S1616 | 0.99 |
| IPI00619921.2 | 11083 | DIDO1    | K.SILAKPE  | 0.431601138 | 0.96 | S1019 | 1.24 |
| IPI00619921.2 | 11083 | DIDO1    | R.RNS*VE   | 0.214968943 | 1    | S1456 | 1.13 |
| IPI00619921.2 | 11083 | DIDO1    | K.TAAPS*F  | 0.233505398 | 0.98 | S523  | 1.12 |
| IPI00619921.2 | 11083 | DIDO1    | R.RNS*VE   | 0.296993866 | 1    | S1456 | 1.16 |
| IPI00619921.2 | 11083 | DIDO1    | K.SILAKPE  | 0.373234869 | 1    | S1017 | 1.06 |
| IPI00619921.2 | 11083 | DIDO1    | K.SKHDSE   | 0.463105648 | 0.88 | S898  | 0.92 |
| IPI00619921.2 | 11083 | DIDO1    | R.S*PPEG   | 0.181528891 | 0.92 | S1040 | 1.18 |
| IPI00619921.2 | 11083 | DIDO1    | R.YLSVPP   | 0.253322457 | 0.94 | S1030 | 1.11 |
| IPI00619921.2 | 11083 | DIDO1    | K.YPLCSA   | 0.072926818 | 0.96 | T1256 | 1.25 |
| IPI00619921.2 | 11083 | DIDO1    | R.RNS*VE   | 0.32093792  | 1    | S1456 | 1.07 |
| IPI00619935.1 | 5927  | JARID1A  | K.DLDLEP   | 0.98101429  | 0.81 | S1111 | 1    |
| IPI00619952.3 | 83605 | CCM2     | R.GIITDS*I | 0.401648339 | 0.88 | S405  | 0.97 |
| IPI00619952.3 | 83605 | CCM2     | R.AIFDGA   | 0.530774648 | 0.96 | T260  | 1.03 |
| IPI00619952.3 | 83605 | CCM2     | R.AIFDGA   | 0.530774648 | 0.96 | T262  | 1.03 |
| IPI00619958.2 | 7163  | TPD52    | K.KLEDVK   | 0.088241621 | 0.98 | S171  | 1.04 |
| IPI00619958.2 | 7163  | TPD52    | K.KLEDVK   | 0.32797409  | 0.94 | T173  | 0.97 |
| IPI00639852.3 | 65057 | ACD      | R.TPSS*PI  | 0.27446972  | 0.98 | S422  | 1.17 |
| IPI00639863.1 | 4534  | MTM1     | K.YNSHSL   | 0.000787564 | 0.64 | S18   | 1.15 |
| IPI00639879.1 | 23248 | KIAA0460 | R.LSSS*PC  | 0.049260986 | 0.56 | S883  | 0.67 |
| IPI00639879.1 | 23248 | KIAA0460 | K.NTGVSF   | 0.197661257 | 0.98 | T458  | 1.12 |
| IPI00639879.1 | 23248 | KIAA0460 | R.ELSNSV   | 0.139636808 | 0.96 | S772  | 1.16 |
| IPI00639879.1 | 23248 | KIAA0460 | K.SSKLS*I  | 0.10132513  | 0.56 | S838  | 0.59 |
| IPI00639879.1 | 23248 | KIAA0460 | R.ELSNSV   | 0.054409842 | 0.92 | S772  | 1.01 |
| IPI00639879.1 | 23248 | KIAA0460 | K.IIS*PGS  | 0.005777772 | 0.81 | S732  | 1.26 |
| IPI00639879.1 | 23248 | KIAA0460 | R.ELSNSV   | 0.116581414 | 1    | S770  | 1.28 |
| IPI00639879.1 | 23248 | KIAA0460 | R.ELSNSV   | 0.214968943 | 0.98 | S770  | 1.25 |
| IPI00639879.1 | 23248 | KIAA0460 | R.SGT*PT   | 0.368149744 | 0.94 | T706  | 1.04 |
| IPI00639879.1 | 23248 | KIAA0460 | K.SFNYS*F  | 0.919312669 | 0.98 | S567  | 1.02 |
| IPI00639879.1 | 23248 | KIAA0460 | K.ASIGQS   | 0.49616549  | 0.98 | S588  | 1.01 |
| IPI00639981.1 | 5214  | PFKP     | R.GRS*FA   | 0.116581414 | 1    | S170  | 1.21 |
| IPI00640040.1 | 9277  | WDR46    | R.RYWEEI   | 0.643675939 | 0.98 | S41   | 1.03 |

|               |               |           |             |            |      |
|---------------|---------------|-----------|-------------|------------|------|
| IPI00640055.1 |               | R.S*PSPAI | 0.072926818 | 0.94 S604  | 1.27 |
| IPI00640055.1 |               | R.TSKEPP  | 0.941751315 | 0.96 S669  | 1.04 |
| IPI00640055.1 |               | R.TLS*AD/ | 0.27446972  | 0.94 S573  | 1.05 |
| IPI00640055.1 |               | R.T*LSAD/ | 0.27446972  | 0.94 T571  | 1.05 |
| IPI00640055.1 |               | R.GPGLLE  | 0.946608772 | 0.88 S439  | 0.97 |
| IPI00640092.1 | 9644 SH3PXD2/ | R.WT*LGC  | 0.060044376 | 0.9 T256   | 1.12 |
| IPI00640092.1 | 9644 SH3PXD2/ | R.RSS*SD  | 0.656107164 | 0.59 S819  | 1    |
| IPI00640136.2 | 64864 RFXDC2  | R.NLS*GS  | 0.072926818 | 0.86 S1178 | 1.19 |
| IPI00640149.1 | 9968 MED12    | R.GDLAFC  | 0.684201094 | 0.94 S635  | 1.05 |
| IPI00640186.1 |               | K.FNIT*PN | 0.387188711 | 0.96 T134  | 0.85 |
| IPI00640318.2 |               | R.LKEDILE | 0.447034483 | 0.62 S53   | 0.37 |
| IPI00640364.1 | 55593 OTUD5   | R.KASATC  | 0.32093792  | 0.96 T449  | 1.12 |
| IPI00640364.1 | 55593 OTUD5   | R.KASATC  | 0.32093792  | 0.03 S450  | 0.03 |
| IPI00640364.1 | 55593 OTUD5   | R.ATS*PL\ | 0.139636808 | 0.98 S508  | 1.24 |
| IPI00640364.1 | 55593 OTUD5   | R.AT*SPL\ | 0.139636808 | 0.98 T507  | 1.24 |
| IPI00640679.1 | 8577 TMEFF1   | R.SVS*PLI | 0.566916624 | 1 S98      | 1.04 |
| IPI00640679.1 | 8577 TMEFF1   | R.S*VSPLI | 0.726073545 | 1 S96      | 1.02 |
| IPI00640703.3 | 57510 XPO5    | R.TCWPTI  | 1.92E-07    | 0.86 Y753  | 0.3  |
| IPI00640759.1 | 23207 PLEKHM2 | K.S*RSDE  | 0.080258071 | 0.85 S307  | 1.11 |
| IPI00640759.1 | 23207 PLEKHM2 | R.T*GSPG  | 0.726073545 | 0.94 T419  | 0.93 |
| IPI00640818.1 | 10908 PNPLA6  | R.LFPS*PC | 0.49616549  | 0.92 S345  | 1    |
| IPI00640847.1 |               | K.AKPAMF  | 0.049260986 | 0.96 S481  | 1.33 |
| IPI00640853.1 | 83444 ZNHIT4  | K.SVPTFT  | 0.49616549  | 0.79 S97   | 0.9  |
| IPI00640853.1 | 83444 ZNHIT4  | K.SVPTFT  | 0.912548374 | 0.79 S99   | 0.74 |
| IPI00640900.1 |               | R.S*SKCC  | 0.660822982 | 0.83 S5    | 1.03 |
| IPI00640924.1 | 23327 NEDD4L  | K.DTLS*NF | 0.040276449 | 0.94 S475  | 1.04 |
| IPI00640924.1 | 23327 NEDD4L  | K.DTLSNP  | 0.152571688 | 0.94 S483  | 1.15 |
| IPI00640924.1 | 23327 NEDD4L  | R.SCS*VTI | 0.373234869 | 0.67 S342  | 0.82 |
| IPI00640924.1 | 23327 NEDD4L  | R.S*LSSP1 | 0.253322457 | 0.98 S382  | 1.11 |
| IPI00640924.1 | 23327 NEDD4L  | R.SLS*SP1 | 0.253322457 | 0.98 S384  | 1.11 |
| IPI00641008.1 | 79980 DSN1    | K.SLHLSP  | 0.637328432 | 0.86 S88   | 1.07 |
| IPI00641008.1 | 79980 DSN1    | R.IHLGSS  | 0.394935546 | 0.83 S58   | 1.1  |
| IPI00641008.1 | 79980 DSN1    | K.SLHLS*F | 0.253322457 | 0.96 S81   | 1.04 |
| IPI00641073.1 | 80736 SLC44A4 | K.FLNRNA  | 0           | 0.58 Y562  | 0.11 |
| IPI00641076.2 | 79567 FAM65A  | R.SQS*FA  | 0.286954617 | 0.86 S36   | 1.19 |
| IPI00641076.2 | 79567 FAM65A  | R.S*QSFA  | 0.286954617 | 0.86 S34   | 1.19 |
| IPI00641076.2 | 79567 FAM65A  | K.HSDPTL  | 0.463105648 | 0.96 S670  | 1.05 |
| IPI00641076.2 | 79567 FAM65A  | R.FSTYSQ  | 0.49616549  | 0.96 S310  | 1.05 |
| IPI00641106.1 | 9656 MDC1     | R.SSGKT*  | 0.463105648 | 0.92 T1403 | 1.06 |
| IPI00641106.1 | 9656 MDC1     | R.SSVKT*I | 0.795669231 | 0.88 T1567 | 0.9  |
| IPI00641106.1 | 9656 MDC1     | R.AQPFGF  | 0.684201094 | 0.86 T331  | 1.06 |
| IPI00641106.1 | 9656 MDC1     | K.SQASMA  | 0.401648339 | 0.76 S402  | 0.92 |
| IPI00641106.1 | 9656 MDC1     | R.AAESLT  | 0.836096036 | 0.98 S1775 | 1.02 |
| IPI00641106.1 | 9656 MDC1     | R.SSVKTP  | 0.854331471 | 0.96 S1570 | 0.99 |
| IPI00641106.1 | 9656 MDC1     | R.SS*VKTI | 0.854331471 | 0.96 S1564 | 0.99 |
| IPI00641106.1 | 9656 MDC1     | K.TPKPVE  | 0.730331964 | 0.86 T1671 | 0.92 |
| IPI00641106.1 | 9656 MDC1     | K.GQAS*S  | 0.32093792  | 1 S963     | 1.11 |
| IPI00641106.1 | 9656 MDC1     | R.SSVKT*I | 0.604563646 | 1 T1608    | 1.02 |
| IPI00641106.1 | 9656 MDC1     | R.AQPFGF  | 0.214968943 | 0.79 S329  | 1.07 |
| IPI00641106.1 | 9656 MDC1     | R.S*SVKTI | 0.726073545 | 1 S1604    | 1    |
| IPI00641106.1 | 9656 MDC1     | R.ESEDSE  | 0.32093792  | 0.92 S780  | 1.08 |

|               |               |           |             |            |      |
|---------------|---------------|-----------|-------------|------------|------|
| IPI00641106.1 | 9656 MDC1     | R.AAESLT  | 0.643675939 | 1 S1775    | 1.01 |
| IPI00641181.4 | 65108 MARCKSL | K.LSGLS*F | 0.233505398 | 1 S104     | 1.15 |
| IPI00641225.1 | 57139 RGL3    | R.VIEPPA/ | 0.044561326 | 0.59 S276  | 1.41 |
| IPI00641268.1 | 11016 ATF7    | K.KAAAGF  | 0.066203153 | 0.53 S97   | 1.09 |
| IPI00641268.1 | 11016 ATF7    | K.KAAAGF  | 0.195343632 | 0.98 S100  | 0.71 |
| IPI00641268.1 | 11016 ATF7    | K.KAAAGF  | 0.195343632 | 0.98 T101  | 0.71 |
| IPI00641268.1 | 11016 ATF7    | K.KAAAGF  | 0.004600913 | 1 S97      | 1.64 |
| IPI00641268.1 | 11016 ATF7    | K.TQGYLE  | 0.463105648 | 0.98 S424  | 1.16 |
| IPI00641268.1 | 11016 ATF7    | K.AAAGPL  | 0.394935546 | 0.98 T101  | 0.87 |
| IPI00641268.1 | 11016 ATF7    | K.AAAGPL  | 0.008098758 | 0.96 S97   | 1.7  |
| IPI00641268.1 | 11016 ATF7    | K.AAAGPL  | 0.008098758 | 0.96 S97   | 1.7  |
| IPI00641287.1 | 9295 SFRS11   | K.LNHVAA  | 0.684201094 | 0.98 S207  | 0.99 |
| IPI00641330.1 | 6015 RING1    | R.RPIPGS  | 0.13480971  | 0.94 S187  | 0.73 |
| IPI00641330.1 | 6015 RING1    | R.TPQEAI  | 0.401648339 | 0.96 S38   | 1    |
| IPI00641582.1 | 9531 BAG3     | R.SS*TPLI | 0.014056191 | 0.98 S284  | 1.43 |
| IPI00641582.1 | 9531 BAG3     | R.AAPSTA  | 0.181528891 | 0.98 T406  | 1.06 |
| IPI00641582.1 | 9531 BAG3     | R.S*SLGSI | 0.401648339 | 1 S194     | 1.05 |
| IPI00641582.1 | 9531 BAG3     | R.SST*PLI | 0.017448313 | 1 T285     | 1.43 |
| IPI00641582.1 | 9531 BAG3     | R.SQS*PA  | 0.088241621 | 1 S173     | 1.22 |
| IPI00641582.1 | 9531 BAG3     | R.S*QSPA  | 0.088241621 | 1 S171     | 1.22 |
| IPI00641582.1 | 9531 BAG3     | R.SSTPLH  | 0.233505398 | 1 S291     | 1.16 |
| IPI00641582.1 | 9531 BAG3     | R.SSTPLH  | 0.233505398 | 1 S289     | 1.16 |
| IPI00641692.2 | 10556 RPP30   | K.KPRPS*I | 0.373234869 | 1 S241     | 1.09 |
| IPI00641692.2 | 10556 RPP30   | K.KPRPSE  | 0.32093792  | 1 S251     | 1.09 |
| IPI00641800.1 | 197259 MLKL   | R.VKST*A` | 0.742065003 | 0.71 T190  | 0.79 |
| IPI00641857.1 | 79600 TECT1   | R.S*TEGE  | 0.000297256 | 0.96 S201  | 1.14 |
| IPI00641864.1 | 7027 TFDPI    | K.VFIDQNI | 0.106353987 | 0.96 S23   | 1.19 |
| IPI00642012.1 | 3925 STMN1    | K.RAS*GQ  | 0.253322457 | 0.83 S16   | 1.01 |
| IPI00642012.1 | 3925 STMN1    | K.RASGQ/  | 0.197661257 | 0.94 S25   | 1.16 |
| IPI00642012.1 | 3925 STMN1    | K.ESVPEF  | 0.296993866 | 0.96 S38   | 1.07 |
| IPI00642012.1 | 3925 STMN1    | R.RKS*HE  | 0.373234869 | 0.76 S63   | 0.95 |
| IPI00642012.1 | 3925 STMN1    | R.ASGQAF  | 0.253322457 | 0.98 S25   | 1.12 |
| IPI00642012.1 | 3925 STMN1    | K.RAS*GQ  | 0.32093792  | 1 S16      | 1.08 |
| IPI00642012.1 | 3925 STMN1    | R.AS*GQA  | 0.233505398 | 0.98 S16   | 1.15 |
| IPI00642012.1 | 3925 STMN1    | K.ESVPEF  | 0.49616549  | 1 S38      | 1.05 |
| IPI00642012.1 | 3925 STMN1    | R.SKESVP  | 0.604563646 | 1 S38      | 1.03 |
| IPI00642018.3 | 84256 FLYWCH1 | R.EKLPS*L | 0.066203153 | 0.74 S191  | 0.61 |
| IPI00642018.3 | 84256 FLYWCH1 | K.AGQEP   | 0.643675939 | 0.98 S21   | 0.95 |
| IPI00642046.1 | 26156 RSL1D1  | K.IKEEAVI | 0.975679369 | 0.96 S444  | 0.96 |
| IPI00642046.1 | 26156 RSL1D1  | K.IKEEAVI | 0.975679369 | 0.96 S442  | 0.96 |
| IPI00642046.1 | 26156 RSL1D1  | K.FFTT*PS | 0.713185935 | 0.96 T464  | 0.9  |
| IPI00642046.1 | 26156 RSL1D1  | K.AT*NESI | 0.777986561 | 0.88 T357  | 0.94 |
| IPI00642046.1 | 26156 RSL1D1  | K.AAASET  | 0.401648339 | 0.94 S426  | 1    |
| IPI00642046.1 | 26156 RSL1D1  | K.FFTT*PS | 0.726073545 | 0.98 T464  | 1.06 |
| IPI00642046.1 | 26156 RSL1D1  | K.ATNES*I | 0.604563646 | 1 S360     | 1.02 |
| IPI00642366.2 | 23271 CAMSAP1 | R.RSSS*M  | 0.401648339 | 0.9 S405   | 1.07 |
| IPI00642366.2 | 23271 CAMSAP1 | R.SESVEC  | 0.03637398  | 0.67 S1310 | 1.27 |
| IPI00642366.2 | 23271 CAMSAP1 | R.SESVEC  | 0.03637398  | 0.67 S1308 | 1.27 |
| IPI00642366.2 | 23271 CAMSAP1 | R.RSS*SM  | 0.197661257 | 0.98 S404  | 1.25 |
| IPI00642366.2 | 23271 CAMSAP1 | R.RS*SSM  | 0.197661257 | 0.98 S403  | 1.25 |
| IPI00642366.2 | 23271 CAMSAP1 | R.SSS*MS  | 0.49616549  | 0.88 S405  | 1.14 |



|               |                |           |             |      |           |      |
|---------------|----------------|-----------|-------------|------|-----------|------|
| IPI00642366.2 | 23271 CAMSAP1  | R.SIS*NEC | 0.029596689 | 0.98 | S453      | 1.23 |
| IPI00642366.2 | 23271 CAMSAP1  | R.S*ISNEC | 0.01942062  | 0.98 | S451      | 1.23 |
| IPI00642366.2 | 23271 CAMSAP1  | K.WLKS*P  | 0.346340474 | 1    | S851      | 1.07 |
| IPI00642422.1 | 55870 ASH1L    | R.KS*PSAI | 0.530774648 | 0.98 | S22       | 1.08 |
| IPI00642422.1 | 55870 ASH1L    | R.AVQTLA  | 0.831562154 | 1    | T1683     | 0.98 |
| IPI00642422.1 | 55870 ASH1L    | R.AVQTLA  | 0.831562154 | 1    | S1681     | 0.98 |
| IPI00642468.1 | 8178 ELL       | R.KLCQPC  | 0.27446972  | 0.96 | S176      | 1.01 |
| IPI00642524.1 | 90780 PYGO2    | R.GGGT*P  | 0.373234869 | 1    | T265      | 1.05 |
| IPI00642705.1 | 8289 ARID1A    | R.NPQMPC  | 0.49616549  | 0.94 | S772      | 1.1  |
| IPI00642705.1 | 8289 ARID1A    | R.NPQMPC  | 0.49616549  | 0.94 | S769      | 1.1  |
| IPI00642705.1 | 8289 ARID1A    | R.SAYPPP  | 0.152571688 | 0.85 | S233      | 1.01 |
| IPI00642705.1 | 8289 ARID1A    | R.GPS*PS  | 0.401648339 | 0.98 | S696      | 1.1  |
| IPI00642862.1 | 85313 PPIL4    | R.INHTVIL | 0.166517367 | 0.28 | T182      | 0.59 |
| IPI00642862.1 | 85313 PPIL4    | R.INHTVIL | 0.116581414 | 0.98 | S178      | 1.03 |
| IPI00642957.1 | 8412 BCAR3     | K.RLS*LTM | 0.27446972  | 0.88 | S199      | 1.11 |
| IPI00643014.1 | 23352 UBR4     | R.HVTLPS  | 0.005157186 | 0.96 | S2730     | 1.24 |
| IPI00643014.1 | 23352 UBR4     | R.HVTLPS  | 0.005157186 | 0.96 | S2718     | 1.24 |
| IPI00643014.1 | 23352 UBR4     | K.TKEQFC  | 0.566916624 | 0.94 | T2468     | 0.86 |
| IPI00643093.1 |                | R.VDSPSF  | 0.829549043 | 0.94 | T695      | 1.07 |
| IPI00643093.1 |                | R.VDSPS*  | 0.253322457 | 0.9  | S690      | 1.02 |
| IPI00643093.1 |                | K.LNLAPA  | 0.346340474 | 0.98 | S178      | 1.09 |
| IPI00643093.1 |                | R.VDS*PS  | 0.373234869 | 0.83 | S688      | 0.95 |
| IPI00643093.1 |                | R.VDS*PS  | 0.253322457 | 0.98 | S688      | 1.12 |
| IPI00643093.1 |                | R.VDSPSF  | 0.296993866 | 1    | S702      | 1.03 |
| IPI00643093.1 |                | K.ICTLPSF | 0.233505398 | 0.98 | S671      | 1.09 |
| IPI00643093.1 |                | R.VDSPS*  | 0.530774648 | 0.98 | S690      | 1.1  |
| IPI00643093.1 |                | K.ICTLPS* | 0.253322457 | 0.98 | S668      | 1.18 |
| IPI00643093.1 |                | K.DGDKS*  | 0.463105648 | 0.98 | S495      | 1.03 |
| IPI00643140.1 | 57794 SF4      | K.AVQQHC  | 0.463105648 | 0.96 | S35       | 1.05 |
| IPI00643151.1 | 79366 NSBP1    | R.S*ARLS' | 0.863736843 | 0.9  | S10       | 0.81 |
| IPI00643151.1 | 79366 NSBP1    | R.LSAMLV  | 0.643675939 | 1    | T21       | 1.03 |
| IPI00643168.3 | 93643 TJAP1    | R.AFVDRT  | 0.431601138 | 0.98 | T412      | 1.01 |
| IPI00643168.3 | 93643 TJAP1    | R.GS*PEE  | 0.604563646 | 0.98 | S290      | 1.02 |
| IPI00643168.3 | 93643 TJAP1    | R.KDS*LTG | 0.006399346 | 0.79 | S535      | 0.62 |
| IPI00643352.1 |                | K.S*PGSTI | 0.181528891 | 0.88 | S430      | 1.12 |
| IPI00643352.1 |                | K.SPGS*TI | 0.181528891 | 0.88 | S433      | 1.12 |
| IPI00643352.1 |                | R.SAQGS   | 0.530774648 | 0.98 | S657      | 1.03 |
| IPI00643352.1 |                | K.QTSLW   | 0.966676636 | 0.96 | S911      | 1.05 |
| IPI00643352.1 |                | R.SAQGS   | 0.410648733 | 0.74 | S666      | 0.96 |
| IPI00643352.1 |                | R.IT*PPAA | 0.604563646 | 1    | T670      | 1.02 |
| IPI00643396.2 | 80206 FHOD3    | R.GKMITD  | 0.004600913 | 0.58 | S1307     | 0.64 |
| IPI00643465.1 | 10579 TACC2    | R.RKS*TD  | 0.000508502 | 0.59 | S2072     | 0.72 |
| IPI00643465.1 | 10579 TACC2    | K.LDNTPA  | 0.106353987 | 0.86 | S2317     | 1.32 |
| IPI00643465.1 | 10579 TACC2    | K.TPEKLD  | 0.401648339 | 0.92 | T2314     | 1.1  |
| IPI00643465.1 | 10579 TACC2    | K.MQES*P  | 0.684201094 | 0.81 | S2359     | 0.88 |
| IPI00643522.1 | 6194 RPS6      | R.RLS*S*L | 0           | 0.96 | S235,S236 | 0.14 |
| IPI00643561.1 | 23274 KIAA0350 | R.VFS*LSE | 0.726073545 | 1    | S948      | 1    |
| IPI00643657.1 | 9757 MLL4      | R.LADVAP  | 0.152571688 | 0.92 | T172      | 1.07 |
| IPI00643657.1 | 9757 MLL4      | K.VAASMF  | 0.115387198 | 0.88 | S821      | 0.92 |
| IPI00643708.1 | 7019 TFAM      | K.NLS*DSI | 0.177590609 | 0.85 | S161      | 0.81 |
| IPI00643733.1 | 8776 MTMR1     | R.GSS*PS  | 0.726073545 | 1    | S653      | 1    |

|               |                 |           |             |              |      |
|---------------|-----------------|-----------|-------------|--------------|------|
| IPI00643808.1 | 51514 DTL       | K.ESRPGL  | 0.00181541  | 1 T429       | 1.62 |
| IPI00643808.1 | 51514 DTL       | K.IEGAGT! | 0.033531167 | 0.86 S623    | 0.69 |
| IPI00643808.1 | 51514 DTL       | R.GSVSS*  | 0.088241621 | 0.98 S488    | 1.25 |
| IPI00643808.1 | 51514 DTL       | R.RLDS*SO | 0.530774648 | 0.96 S557    | 1.18 |
| IPI00643808.1 | 51514 DTL       | R.TPSSS*F | 0.106353987 | 0.61 S512    | 1    |
| IPI00643818.1 | 163859 C1orf55  | R.VVNTDF  | 0.132773239 | 0.85 S183    | 0.86 |
| IPI00643900.1 | 4677 NARS       | R.WNVISK  | 0.099657188 | 0.88 S60     | 0.95 |
| IPI00643923.2 | 84726 KIAA0515  | R.HIISATS | 0.346340474 | 0.98 S226    | 0.98 |
| IPI00643923.2 | 84726 KIAA0515  | R.SFS*SQ  | 0.373234869 | 0.98 S742    | 1.03 |
| IPI00643923.2 | 84726 KIAA0515  | R.KVTPID! | 0.214968943 | 0.9 S740     | 1.05 |
| IPI00643923.2 | 84726 KIAA0515  | R.SSPYGT  | 0.952395062 | 0.79 T1014   | 1.03 |
| IPI00644021.1 | 26750 RPS6KC1   | R.SKNS*P  | 0.684201094 | 0.96 S584    | 0.96 |
| IPI00644021.1 | 26750 RPS6KC1   | R.KGVDLL  | 0.27446972  | 0.98 T272    | 1.1  |
| IPI00644021.1 | 26750 RPS6KC1   | R.KGVDLL  | 0.27446972  | 0.98 S269    | 1.1  |
| IPI00644210.1 | 84656 N-PAC     | R.KLS*LSE | 0.528118232 | 0.94 S61     | 0.81 |
| IPI00644228.1 | 83549 UCK1      | R.TFS*EP! | 0.401648339 | 0.94 S244    | 1.08 |
| IPI00644228.1 | 83549 UCK1      | R.T*FSEPC | 0.401648339 | 0.94 T242    | 1.08 |
| IPI00644438.1 | 199953 RP13-15M | R.ADSGYL  | 0.205975059 | 0.86 S471    | 1.2  |
| IPI00644438.1 | 199953 RP13-15M | R.RTS*PS! | 0.197661257 | 0.98 S441    | 1.11 |
| IPI00644438.1 | 199953 RP13-15M | R.ADSGYL  | 0.942907226 | 0.92 S477    | 1    |
| IPI00644438.1 | 199953 RP13-15M | R.ALS*LG! | 0.166517367 | 0.98 S454    | 1.2  |
| IPI00644552.1 | 1877 E4F1       | R.EAGEG/  | 0.775968482 | 0.83 S50     | 0.9  |
| IPI00644591.2 | 64423 C14orf173 | R.RSSWY'  | 0.139636808 | 0.96 Y570    | 1.03 |
| IPI00644989.1 | 10130 PDIA6     | R.DGELPV  | 0.604563646 | 0.98 S428    | 1.08 |
| IPI00645078.1 | 7317 UBE1       | K.ATLPS*F | 0.401648339 | 0.92 S835    | 0.99 |
| IPI00645078.1 | 7317 UBE1       | R.RVS*GP  | 3.87E-08    | 0.61 S13     | 1.78 |
| IPI00645179.2 | 84665 MYPN      | K.HSPNLS  | 0.214968943 | 0.9 S127     | 1.1  |
| IPI00645179.2 | 84665 MYPN      | K.HSPNLS  | 0.214968943 | 0.9 S124     | 1.1  |
| IPI00645179.2 | 84665 MYPN      | R.TVS*KE! | 0.139636808 | 0.98 S759    | 1.13 |
| IPI00645179.2 | 84665 MYPN      | R.T*VSKE! | 0.139636808 | 0.98 T757    | 1.13 |
| IPI00645192.2 | 4204 MECP2      | K.MPFQTS  | 0.952395062 | 0.98 S241    | 0.97 |
| IPI00645192.2 | 4204 MECP2      | K.AETSEG  | 0.684201094 | 1 S92        | 1.11 |
| IPI00645298.1 | 7402 UTRN       | R.LGYLPV  | 0.03637398  | 0.72 Not con | 1.15 |
| IPI00645298.1 | 7402 UTRN       | R.LGYLPV  | 0.197661257 | 0.92 Not con | 1.06 |
| IPI00645329.1 | 5928 RBBP4      | K.IGEEQS' | 0.49616549  | 0.79 S355    | 1.01 |
| IPI00645608.1 | 26145 IRF2BP1   | K.NVAEAL  | 0.401648339 | 0.9 S436     | 0.98 |
| IPI00645608.1 | 26145 IRF2BP1   | R.AGGAS*  | 0.373234869 | 1 S453       | 1.13 |
| IPI00645613.1 | 58513 EPS15L1   | R.STPSHC  | 0.49616549  | 0.88 S253    | 0.92 |
| IPI00645613.1 | 58513 EPS15L1   | R.STPSHC  | 0.49616549  | 0.98 S255    | 0.98 |
| IPI00645613.1 | 58513 EPS15L1   | R.STPSHC  | 0.431601138 | 1 T251       | 1.06 |
| IPI00645613.1 | 58513 EPS15L1   | K.TVFPGA  | 0.814911089 | 0.81 S229    | 0.69 |
| IPI00645725.1 | 57648 KIAA1522  | R.S*TVLGI | 0.431601138 | 1 S172       | 1.05 |
| IPI00645725.1 | 57648 KIAA1522  | K.LQLERP  | 0.27446972  | 0.96 S940    | 1.14 |
| IPI00645725.1 | 57648 KIAA1522  | R.VTSLRS  | 0.248994789 | 0.76 S573    | 0.92 |
| IPI00645725.1 | 57648 KIAA1522  | K.LQLERP  | 0.139636808 | 0.98 T943    | 1.24 |
| IPI00645725.1 | 57648 KIAA1522  | R.ST*VLGI | 0.296993866 | 0.86 T173    | 0.96 |
| IPI00645725.1 | 57648 KIAA1522  | K.GLAGPF  | 0.293581759 | 0.9 S556     | 0.91 |
| IPI00645725.1 | 57648 KIAA1522  | R.VTS*LR! | 0.891255812 | 0.96 S570    | 1.09 |
| IPI00645816.1 | 10849 CD3EAP    | R.SALAPN  | 0.431601138 | 1 T171       | 1.08 |
| IPI00645816.1 | 10849 CD3EAP    | R.SALAPN  | 0.72279082  | 0.81 T171    | 0.88 |
| IPI00645816.1 | 10849 CD3EAP    | R.SALAPN  | 0.72279082  | 0.81 S172    | 0.88 |

|               |                 |           |             |           |      |
|---------------|-----------------|-----------|-------------|-----------|------|
| IPI00645816.1 | 10849 CD3EAP    | R.SALAPN  | 0.530774648 | 1 S172    | 1.03 |
| IPI00645857.2 | 51362 CDC40     | K.SPSSKP  | 0.139636808 | 0.92 S49  | 1.31 |
| IPI00645857.2 | 51362 CDC40     | K.S*PSSKI | 0.096924105 | 0.9 S43   | 1.07 |
| IPI00645857.2 | 51362 CDC40     | K.SPSS*KI | 0.116581414 | 0.94 S46  | 1.22 |
| IPI00645857.2 | 51362 CDC40     | K.S*PSSKI | 0.106353987 | 0.94 S43  | 1.22 |
| IPI00645857.2 | 51362 CDC40     | K.SPSSKP  | 0.12765804  | 0.88 S49  | 1.09 |
| IPI00645857.2 | 51362 CDC40     | K.SPS*SKI | 0.12765804  | 0.88 S45  | 1.09 |
| IPI00645882.1 | 56181 FAM54B    | K.ASS*FAI | 0.431601138 | 0.88 S226 | 0.94 |
| IPI00646058.1 | 6294 SAFB       | K.RSVVS*I | 0.401648339 | 0.98 S604 | 1.07 |
| IPI00646058.1 | 6294 SAFB       | R.SVVS*FI | 0.49616549  | 0.96 S604 | 0.98 |
| IPI00646058.1 | 6294 SAFB       | R.S*VVVFI | 0.530774648 | 1 S601    | 1.04 |
| IPI00646058.1 | 6294 SAFB       | R.TDCEPV  | 0.51496205  | 0.98 S344 | 0.64 |
| IPI00646058.1 | 6294 SAFB       | K.ELPEQL  | 0.566916624 | 0.96 T200 | 1.02 |
| IPI00646058.1 | 6294 SAFB       | K.ELPEQL  | 0.89791754  | 0.94 S195 | 0.87 |
| IPI00646058.1 | 6294 SAFB       | R.SVVS*FI | 0.566916624 | 1 S604    | 1.05 |
| IPI00646058.1 | 6294 SAFB       | K.SEPVKE  | 0.990601784 | 0.96 S235 | 0.93 |
| IPI00646058.1 | 6294 SAFB       | K.SEPVKE  | 0.990601784 | 0.96 S234 | 0.93 |
| IPI00646058.1 | 6294 SAFB       | K.ELPEQL  | 0.800118017 | 0.94 S197 | 0.89 |
| IPI00646311.2 | 10389 SCML2     | R.SVPGTT  | 0.014056191 | 0.77 S590 | 1.12 |
| IPI00646311.2 | 10389 SCML2     | R.S*PQQT  | 0.373234869 | 0.86 S499 | 0.99 |
| IPI00646311.2 | 10389 SCML2     | K.RS*PQQ  | 0.214968943 | 1 S499    | 1.17 |
| IPI00646311.2 | 10389 SCML2     | R.SVPGTT  | 0.252038815 | 0.92 S590 | 0.62 |
| IPI00646410.1 | 221656 AOF1     | K.ASFDHS  | 0.197661257 | 0.98 S17  | 1.03 |
| IPI00646410.1 | 221656 AOF1     | K.KASFDH  | 0.066203153 | 0.9 S17   | 0.84 |
| IPI00646782.1 | 84895 FAM73B    | R.TLMLPL  | 0.566916624 | 0.86 S276 | 1.09 |
| IPI00646837.1 | 64062 RBM26     | R.LNHS*PI | 0.197661257 | 0.92 S127 | 1.04 |
| IPI00646837.1 | 64062 RBM26     | R.EGSTQC  | 0.431601138 | 0.94 T168 | 1.03 |
| IPI00646867.1 |                 | R.TYSLGS  | 0.234103486 | 0.74 T48  | 0.91 |
| IPI00646867.1 |                 | R.TYSLGS  | 0.234103486 | 0.74 S47  | 0.91 |
| IPI00646867.1 |                 | R.TYS*LG  | 0.614059792 | 0.76 S39  | 0.86 |
| IPI00646867.1 |                 | R.SLYASS  | 0.849757871 | 0.98 S56  | 1    |
| IPI00646885.1 | 394 ARHGAP5     | R.LYHDS*  | 0.577359743 | 0.96 S590 | 0.85 |
| IPI00646890.1 | 9739 SETD1A     | R.DTGSEV  | 0.296993866 | 0.98 T540 | 1.17 |
| IPI00646954.1 | 55740 ENAH      | R.TNTMNC  | 0.233505398 | 1 S755    | 1.11 |
| IPI00646954.1 | 55740 ENAH      | R.TNTMNC  | 0.233505398 | 1 S753    | 1.11 |
| IPI00646954.1 | 55740 ENAH      | R.TNTMNC  | 0.166517367 | 1 S759    | 1.11 |
| IPI00646970.1 | 359948 IRF2BP2  | K.RPAS*V  | 0.253322457 | 0.98 S240 | 1.13 |
| IPI00646970.1 | 359948 IRF2BP2  | K.RPASVS  | 0.253322457 | 0.98 S244 | 1.13 |
| IPI00646970.1 | 359948 IRF2BP2  | K.RPASVS  | 0.253322457 | 1 S243    | 1.14 |
| IPI00646970.1 | 359948 IRF2BP2  | K.RPASVS  | 0.253322457 | 1 S242    | 1.14 |
| IPI00646970.1 | 359948 IRF2BP2  | K.LEEPPE  | 0.463105648 | 0.88 S175 | 1.14 |
| IPI00647095.1 | 4007 LMO6       | R.VS*FRD  | 0.253322457 | 0.9 S475  | 1.29 |
| IPI00647192.1 | 83608 C18orf21  | R.SFVSTL  | 0.152571688 | 0.98 S126 | 1.09 |
| IPI00647239.3 | 254427 C10orf47 | R.MAGNE   | 0.233505398 | 0.92 S212 | 1.28 |
| IPI00647239.3 | 254427 C10orf47 | R.SRS*FTI | 0.197661257 | 0.98 S43  | 1.18 |
| IPI00647239.3 | 254427 C10orf47 | R.S*RSFTI | 0.197661257 | 0.98 S41  | 1.18 |
| IPI00647286.1 | 64855 FAM129B   | K.AAPEAS  | 0.431601138 | 0.14 S691 | 0.59 |
| IPI00647286.1 | 64855 FAM129B   | K.AVDLGP  | 0.080258071 | 0.96 S728 | 1.13 |
| IPI00647286.1 | 64855 FAM129B   | K.AAPEAS  | 0.431601138 | 1 S692    | 1.06 |
| IPI00647446.1 | 54801 FAM29A    | K.LEPNS*F | 0.98101429  | 0.83 S805 | 0.87 |
| IPI00647446.1 | 54801 FAM29A    | R.NQIPRT  | 0.32093792  | 0.98 T584 | 1.12 |

|               |               |            |             |            |      |
|---------------|---------------|------------|-------------|------------|------|
| IPI00647596.1 | 3930 LBR      | R.EVEVKL   | 0.296993866 | 0.9 T118   | 1.14 |
| IPI00647596.1 | 3930 LBR      | R.EVEVKL   | 0.49616549  | 0.94 T118  | 0.96 |
| IPI00647596.1 | 3930 LBR      | K.LT*PLILP | 0.942907226 | 0.92 T118  | 0.93 |
| IPI00647621.2 | 282996 RBM20  | R.S*GSPN   | 0.726073545 | 1 S717     | 1    |
| IPI00647621.2 | 282996 RBM20  | R.SGS*PN   | 0.726073545 | 1 S719     | 1    |
| IPI00647720.1 | 10250 SRRM1   | R.APQTSS   | 0.106353987 | 0.9 S695   | 0.95 |
| IPI00647720.1 | 10250 SRRM1   | R.RYS*PP   | 0.066203153 | 1 S597     | 1.31 |
| IPI00647752.1 | 56957 OTUD7B  | R.GIS*HAE  | 0.643675939 | 0.98 S100  | 1.25 |
| IPI00647868.1 | 261734 NPHP4  | R.IFSNQPI  | 0.530774648 | 0.88 S142  | 1.2  |
| IPI00647892.1 | 9787 DLG7     | R.HIS*FGC  | 0.726073545 | 1 S830     | 1    |
| IPI00647892.1 | 9787 DLG7     | R.HISFGG   | 0.726073545 | 1 T837     | 1    |
| IPI00647892.1 | 9787 DLG7     | R.MS*LPLI  | 0.936890791 | 0.92 S725  | 0.89 |
| IPI00647892.1 | 9787 DLG7     | R.HIS*FGC  | 0.726073545 | 1 S830     | 1    |
| IPI00647892.1 | 9787 DLG7     | K.SLTTEC   | 0.401648339 | 0.98 S806  | 0.91 |
| IPI00647892.1 | 9787 DLG7     | R.SS*IEDA  | 0.956313787 | 0.92 S690  | 0.83 |
| IPI00647892.1 | 9787 DLG7     | R.S*SIEDA  | 0.956313787 | 0.92 S689  | 0.83 |
| IPI00647892.1 | 9787 DLG7     | R.HISFGG   | 0.726073545 | 1 S839     | 1    |
| IPI00647951.1 | 54820 NDE1    | R.RPSS*TI  | 0.008070766 | 0.81 S307  | 1    |
| IPI00647951.1 | 54820 NDE1    | R.RPS*STI  | 0.014634379 | 0.86 S306  | 0.58 |
| IPI00651638.1 | 154810 AMOTL1 | R.SVPSIA/  | 0.093180902 | 0.74 S755  | 0.65 |
| IPI00651638.1 | 154810 AMOTL1 | R.SVPSIA/  | 0.093180902 | 0.74 T753  | 0.65 |
| IPI00651643.2 | 8878 SQSTM1   | R.S*RLTP\  | 1.65E-06    | 0.81 S266  | 0.68 |
| IPI00651643.2 | 8878 SQSTM1   | R.RFS*FCI  | 0.181528891 | 0.94 S24   | 1.04 |
| IPI00651653.1 | 10521 DDX17   | R.S*SQSS   | 0.066203153 | 0.77 S594  | 1.08 |
| IPI00651653.1 | 10521 DDX17   | R.SS*QSS   | 0.066203153 | 0.77 S595  | 1.08 |
| IPI00651766.1 | 7071 KLF10    | R.KNIPCA/  | 0.604563646 | 0.9 S195   | 0.99 |
| IPI00651766.1 | 7071 KLF10    | R.LSPIAP/  | 0.181528891 | 0.67 S340  | 0.76 |
| IPI00651771.1 | 64219 PJA1    | R.NLAS*PI  | 0.751811379 | 0.88 S210  | 1.06 |
| IPI00654555.2 | 4839 NOL1     | K.TNKS*PI  | 0.530774648 | 0.96 S67   | 0.98 |
| IPI00654555.2 | 4839 NOL1     | R.RLGS*V   | 0.431601138 | 1 S58      | 1.07 |
| IPI00654555.2 | 4839 NOL1     | K.GPQPPT   | 0.12765804  | 0.94 S819  | 1.14 |
| IPI00654555.2 | 4839 NOL1     | K.GTDTQT   | 0.296993866 | 1 S767     | 1.12 |
| IPI00654555.2 | 4839 NOL1     | K.GTDTQT   | 0.296993866 | 1 S765     | 1.12 |
| IPI00654603.3 | 55704 CCDC88A | R.RTS*IHC  | 0.32093792  | 0.98 S1792 | 1.01 |
| IPI00654605.1 | 55700 MAP7D1  | R.RSSQPE   | 0.026666866 | 0.88 S116  | 1.26 |
| IPI00654605.1 | 55700 MAP7D1  | R.SRS*AV   | 0.049260986 | 0.96 S313  | 1.37 |
| IPI00654605.1 | 55700 MAP7D1  | K.ESAAPA   | 0.296993866 | 0.98 S548  | 1.05 |
| IPI00654605.1 | 55700 MAP7D1  | K.SLSRT*F  | 0.208688308 | 0.94 T813  | 0.75 |
| IPI00654605.1 | 55700 MAP7D1  | R.RSS*QP   | 0.346340474 | 0.92 S113  | 1.1  |
| IPI00654605.1 | 55700 MAP7D1  | K.ESAAPA   | 0.253322457 | 1 S544     | 1.15 |
| IPI00654605.1 | 55700 MAP7D1  | K.ES*AAP/  | 0.253322457 | 1 S539     | 1.15 |
| IPI00654605.1 | 55700 MAP7D1  | R.RSS*QP   | 0.27446972  | 0.98 S113  | 1.13 |
| IPI00654605.1 | 55700 MAP7D1  | R.RSS*QP   | 0.27446972  | 0.98 S113  | 1.13 |
| IPI00654605.1 | 55700 MAP7D1  | R.T*PETLL  | 0.078322436 | 0.79 T813  | 0.96 |
| IPI00654605.1 | 55700 MAP7D1  | R.RSS*QP   | 0.643675939 | 0.96 S113  | 1.1  |
| IPI00654605.1 | 55700 MAP7D1  | R.RSS*QP   | 0.643675939 | 0.96 S113  | 1.1  |
| IPI00654605.1 | 55700 MAP7D1  | K.ESAAPA   | 0.152571688 | 0.81 S544  | 1.05 |
| IPI00654605.1 | 55700 MAP7D1  | R.RSS*QP   | 0.401648339 | 1 S113     | 1.12 |
| IPI00654605.1 | 55700 MAP7D1  | R.RS*SQP   | 0.296993866 | 1 S112     | 1.12 |
| IPI00654605.1 | 55700 MAP7D1  | R.RSSQPE   | 0.296993866 | 1 S116     | 1.12 |
| IPI00654605.1 | 55700 MAP7D1  | K.SLS*RTF  | 0.208688308 | 0.98 S811  | 0.93 |

|               |               |           |             |      |       |      |
|---------------|---------------|-----------|-------------|------|-------|------|
| IPI00654682.1 | 57018 CCNL1   | K.GLNPDG  | 0.021743049 | 0.64 | S335  | 0.35 |
| IPI00654682.1 | 57018 CCNL1   | K.GLNPDG  | 0.043241458 | 0.98 | S335  | 0.64 |
| IPI00654771.2 |               | K.ESLSTH  | 0.253322457 | 0.96 | S219  | 1.12 |
| IPI00654771.2 |               | K.ESLSTH  | 0.296993866 | 1    | S215  | 1.18 |
| IPI00654771.2 |               | K.ESLSTH  | 0.932027377 | 0.98 | T214  | 1.04 |
| IPI00654779.1 | 7353 UFD1L    | K.GVEPSF  | 0.373234869 | 0.98 | S236  | 1.07 |
| IPI00654832.1 | 117178 SSX2IP | K.EMISLLE | 0.088241621 | 0.94 | S293  | 1.38 |
| IPI00654870.1 |               | R.SSSQSC  | 0.401648339 | 1    | S47   | 1.06 |
| IPI00654870.1 |               | R.SSSQSC  | 0.401648339 | 1    | S48   | 1.06 |
| IPI00655607.2 | 54899 P XK    | K.YSNSNM  | 0           | 0.94 | S471  | 6.35 |
| IPI00655699.1 | 10557 RPP38   | R.IEDSGE  | 0.005157186 | 0.88 | S235  | 0.97 |
| IPI00655699.1 | 10557 RPP38   | R.ELLDTS  | 0.296993866 | 0.98 | S235  | 1.08 |
| IPI00655718.1 | 147138 TMC8   | R.ASS*RP  | 0.373234869 | 0.98 | S299  | 1.06 |
| IPI00655885.1 | 55775 TDP1    | R.WTISSS  | 0.002042313 | 0.85 | S18   | 1.11 |
| IPI00655885.1 | 55775 TDP1    | R.WTISSS  | 0.002042313 | 0.85 | S15   | 1.11 |
| IPI00655887.1 | 84220 RGPD5   | K.DSLITP  | 0.829549043 | 0.88 | S1478 | 0.99 |
| IPI00655887.1 | 84220 RGPD5   | K.SALSLSI | 0.356956072 | 0.94 | S1304 | 0.97 |
| IPI00656039.3 |               | R.VLS*MD  | 0.455306331 | 0.94 | S386  | 0.86 |
| IPI00656048.1 | 9841 ZBTB24   | K.AYTFDQ  | 0.822525206 | 0.88 | S134  | 1    |
| IPI00656138.1 | 5058 PAK1     | K.AVSETP  | 0.000141509 | 0.66 | S174  | 1.29 |
| IPI00657687.1 | 54443 ANLN    | K.NKAS*P  | 0.49616549  | 0.9  | S792  | 1.16 |
| IPI00657687.1 | 54443 ANLN    | K.NKASPC  | 0.49616549  | 0.9  | S795  | 1.16 |
| IPI00657687.1 | 54443 ANLN    | K.SNIHSS  | 0.096924105 | 0.98 | S927  | 1.06 |
| IPI00657687.1 | 54443 ANLN    | K.TPIS*PL | 0.49616549  | 0.88 | S323  | 0.9  |
| IPI00657687.1 | 54443 ANLN    | K.ST*TPG  | 0.566916624 | 0.94 | T363  | 0.98 |
| IPI00657687.1 | 54443 ANLN    | K.STT*PG  | 0.296993866 | 0.98 | T364  | 1.1  |
| IPI00657687.1 | 54443 ANLN    | R.AESGDE  | 0.024460454 | 0.85 | S661  | 0.51 |
| IPI00657687.1 | 54443 ANLN    | K.SCSPS*I | 0.586469457 | 0.69 | S99   | 0.9  |
| IPI00657687.1 | 54443 ANLN    | R.AESGDE  | 0.187602579 | 0.86 | S664  | 0.85 |
| IPI00657687.1 | 54443 ANLN    | R.AES*GD  | 0.187602579 | 0.86 | S658  | 0.85 |
| IPI00657708.1 | 7158 TP53BP1  | R.RSDS*P  | 0.296993866 | 0.98 | S1417 | 1.15 |
| IPI00657708.1 | 7158 TP53BP1  | R.STPFIV  | 0.530774648 | 0.96 | S385  | 0.94 |
| IPI00657721.1 | 26121 PRPF31  | R.S*S*GT  | 0.079724745 | 0.81 | S439  | 0.66 |
| IPI00657721.1 | 26121 PRPF31  | R.SSGTAS  | 0.079724745 | 0.81 | S445  | 0.66 |
| IPI00657791.1 | 55536 CDCA7L  | R.RAFS*E  | 0.900575286 | 0.94 | S261  | 0.93 |
| IPI00657791.1 | 55536 CDCA7L  | K.EVADIF  | 0.886608864 | 0.96 | S21   | 1.09 |
| IPI00657842.1 | 2355 FOSL2    | R.S*PPAP  | 0.604563646 | 0.98 | S192  | 1.09 |
| IPI00657842.1 | 2355 FOSL2    | R.RS*SSS  | 0.019748483 | 0.9  | S299  | 0.88 |
| IPI00657938.1 | 112574 SNAG1  | R.NLNRFS  | 0.066203153 | 0.92 | S233  | 0.99 |
| IPI00657953.1 | 7204 TRIO     | R.LLVRPT  | 0.106353987 | 0.96 | S1901 | 1.19 |
| IPI00657954.1 | 9879 DDX46    | K.AALGLQ  | 0.684201094 | 0.86 | S804  | 0.98 |
| IPI00658100.1 | 80012 PHC3    | R.TPPPPT  | 0.233505398 | 0.81 | S597  | 1.05 |
| IPI00658100.1 | 80012 PHC3    | R.MDRT*P  | 0.296993866 | 1    | T590  | 1.09 |
| IPI00658128.1 | 57620 STIM2   | R.KQS*PP  | 0.863507405 | 0.66 | S704  | 0.82 |
| IPI00658128.1 | 57620 STIM2   | R.HTS*CS  | 0.000485008 | 0.88 | S792  | 1    |
| IPI00658152.1 | 64759 TNS3    | R.SCPETL  | 0.27446972  | 0.96 | S901  | 1.19 |
| IPI00658152.1 | 64759 TNS3    | R.KLS*LG  | 0.253322457 | 0.98 | S776  | 1.1  |
| IPI00658152.1 | 64759 TNS3    | R.SLGSVS  | 0.181528891 | 0.98 | S1115 | 1.19 |
| IPI00658152.1 | 64759 TNS3    | R.SLGSVS  | 0.181528891 | 0.98 | S1115 | 1.19 |
| IPI00658152.1 | 64759 TNS3    | R.LILELDP | 0.530774648 | 0.94 | S732  | 1.06 |
| IPI00658210.1 | 57599 WDR48   | K.GIHNFR  | 0.296993866 | 0.94 | S335  | 0.98 |

|               |                |           |             |            |      |
|---------------|----------------|-----------|-------------|------------|------|
| IPI00718899.1 | 146956 EME1    | K.IPEVPLF | 0.32093792  | 0.9 T150   | 0.99 |
| IPI00718992.1 | 57217 TTC7A    | R.RGSPSA  | 0.530774648 | 0.85 T57   | 1.1  |
| IPI00718992.1 | 57217 TTC7A    | R.RGS*PS  | 0.253322457 | 0.98 S51   | 1.02 |
| IPI00718992.1 | 57217 TTC7A    | R.RGSPS*  | 0.233505398 | 0.98 S53   | 1.02 |
| IPI00719073.1 | 57680 CHD8     | R.S*QEMV  | 0.166517367 | 0.81 S2047 | 0.79 |
| IPI00719073.1 | 57680 CHD8     | K.VLSASE  | 0.909927945 | 0.94 S297  | 0.99 |
| IPI00719073.1 | 57680 CHD8     | R.T*ASPLF | 0.021601024 | 0.69 T1858 | 0.51 |
| IPI00719073.1 | 57680 CHD8     | R.SQEMV   | 0.001432711 | 0.94 S2065 | 1.58 |
| IPI00719073.1 | 57680 CHD8     | R.APGYPE  | 0.029596689 | 0.96 S2383 | 1.26 |
| IPI00719073.1 | 57680 CHD8     | R.TAS*PLF | 0.021601024 | 0.98 S1860 | 1.27 |
| IPI00719073.1 | 57680 CHD8     | R.T*ASPLF | 0.072926818 | 0.98 T1858 | 1.15 |
| IPI00719073.1 | 57680 CHD8     | R.SQEMV   | 0.007240509 | 0.77 S2076 | 1.58 |
| IPI00719073.1 | 57680 CHD8     | R.VS*PSD  | 0.27446972  | 0.98 S1911 | 1.17 |
| IPI00719106.1 | 79869 FLJ12529 | R.VLIS*SL | 0.017448313 | 0.94 S385  | 1.22 |
| IPI00719106.1 | 79869 FLJ12529 | R.DSSDSA  | 0.233505398 | 0.98 T194  | 1.2  |
| IPI00719125.1 | 353174 LGICZ1  | R.VFVSNV  | 0.401648339 | 1 S85      | 1.08 |
| IPI00719331.1 |                | K.GCLTTP  | 0.296993866 | 0.94 S269  | 1.06 |
| IPI00719587.1 | 27 ABL2        | K.VPVLIS* | 0.401648339 | 0.98 S921  | 1.06 |
| IPI00719587.1 | 27 ABL2        | K.VPVLISF | 0.401648339 | 0.98 T923  | 1.06 |
| IPI00719587.1 | 27 ABL2        | K.TGGS*S  | 0.181528891 | 1 S56      | 1.18 |
| IPI00719587.1 | 27 ABL2        | K.TGGS*   | 0.181528891 | 1 S57      | 1.18 |
| IPI00719587.1 | 27 ABL2        | K.GGFFSS  | 0.346340474 | 0.98 S640  | 1.2  |
| IPI00719643.1 | 23064 SETX     | R.S*LTHPF | 0.233505398 | 0.79 S2439 | 1.34 |
| IPI00719643.1 | 23064 SETX     | K.KS*SPF  | 0.106353987 | 0.85 S910  | 0.92 |
| IPI00719643.1 | 23064 SETX     | R.RLS*DC  | 0.000888315 | 0.62 S1366 | 0.84 |
| IPI00719643.1 | 23064 SETX     | R.RLSDCE  | 0.000888315 | 0.62 S1370 | 0.84 |
| IPI00719643.1 | 23064 SETX     | K.KSS*PF  | 0.642010044 | 0.98 S911  | 1.03 |
| IPI00719752.1 | 8662 EIF3S9    | R.TEPAAE  | 0.181528891 | 0.92 S81   | 1.09 |
| IPI00719752.1 | 8662 EIF3S9    | R.TEPAAE  | 0.604563646 | 0.96 S85   | 1.03 |
| IPI00719752.1 | 8662 EIF3S9    | R.ALENGE  | 0.827038504 | 0.98 S152  | 0.96 |
| IPI00735732.1 | 4133 MAP2      | R.ATFS*D  | 0           | 0.74 S205  | 6.3  |
| IPI00735732.1 | 4133 MAP2      | R.VDHGAE  | 0.088241621 | 1 S514     | 1.38 |
| IPI00735758.1 |                | K.HSTPSP  | 0.045978168 | 0.86 Y130  | 0.75 |
| IPI00735758.1 |                | K.DSLITPF | 0.829549043 | 0.88 S823  | 0.99 |
| IPI00735758.1 |                | K.HSTPS*I | 0.032806498 | 0.96 S126  | 0.72 |
| IPI00735758.1 |                | K.SALSLSI | 0.356956072 | 0.94 S649  | 0.97 |
| IPI00735758.1 |                | R.EDALDC  | 0.853966795 | 0.96 S620  | 0.86 |
| IPI00735758.1 |                | R.LLPVINT | 0.86862174  | 0.94 S1087 | 0.88 |
| IPI00735758.1 |                | R.LLLDIPL | 0.113558743 | 0.96 T522  | 0.89 |
| IPI00735855.1 | 171024 SYNPO2  | K.SSSSQF  | 0.530774648 | 0.85 S777  | 0.99 |
| IPI00735855.1 | 171024 SYNPO2  | R.GVSS*P  | 0.463105648 | 0.88 S638  | 1.08 |
| IPI00735885.1 | 170394 PWWP2   | R.APAEQV  | 0.139636808 | 0.98 S248  | 1.28 |
| IPI00735918.1 |                | R.HESEVN  | 1.13E-05    | 0.77 T609  | 2.51 |
| IPI00736092.1 |                | R.HLQQG   | 0.088241621 | 0.86 S395  | 1.03 |
| IPI00736092.1 |                | R.T*ISAQC | 0.033531167 | 0.98 T350  | 0.84 |
| IPI00736092.1 |                | R.TIS*AQC | 0.033531167 | 0.98 S352  | 0.84 |
| IPI00736414.1 |                | R.AADGGE  | 0.431601138 | 0.96 S703  | 1.04 |
| IPI00736414.1 |                | R.SPS*DLI | 0.401648339 | 0.98 S315  | 1.1  |
| IPI00736414.1 |                | R.SPSDLH  | 0.463105648 | 1 S320     | 1.09 |
| IPI00736431.1 |                | K.RFS*TP  | 0.49616549  | 0.72 S776  | 0.87 |
| IPI00736431.1 |                | R.HFS*SA  | 0.072926818 | 0.9 S18    | 1.15 |

|               |                 |           |             |      |       |      |
|---------------|-----------------|-----------|-------------|------|-------|------|
| IPI00736661.1 | 9712 USP6NL     | R.IEVLPE  | 0.604563646 | 0.98 | S716  | 1.03 |
| IPI00737083.1 | 22992 FBXL11    | R.SCDEPL  | 0.253322457 | 0.83 | T713  | 1.03 |
| IPI00737083.1 | 22992 FBXL11    | R.SCDEPL  | 0.373234869 | 0.98 | T713  | 1.13 |
| IPI00737083.1 | 22992 FBXL11    | R.LT*PVRF | 0.49616549  | 1    | T550  | 1.06 |
| IPI00737355.1 |                 | R.NHVVHQL | 0.684201094 | 0.94 | Y148  | 0.94 |
| IPI00737969.1 | 57553 MICAL3    | R.LGS*PL  | 0.27446972  | 0.81 | S283  | 1.27 |
| IPI00737969.1 | 57553 MICAL3    | R.LGS*PL  | 0.431601138 | 0.98 | S283  | 1.13 |
| IPI00737991.1 | 59339 PLEKHA2   | R.SIS*LTR | 0.03637398  | 0.98 | S314  | 1.38 |
| IPI00737991.1 | 59339 PLEKHA2   | R.RSQS*Y  | 0.106353987 | 0.98 | S184  | 1.18 |
| IPI00737991.1 | 59339 PLEKHA2   | K.APSVAS  | 0.831562154 | 0.86 | S352  | 1.29 |
| IPI00737991.1 | 59339 PLEKHA2   | K.APS*VA  | 0.831562154 | 0.86 | S349  | 1.29 |
| IPI00737991.1 | 59339 PLEKHA2   | R.SQS*YIF | 0.029596689 | 1    | S184  | 1.31 |
| IPI00738043.1 |                 | K.LSIMIEE | 0.195343632 | 0.86 | Y60   | 0.49 |
| IPI00738216.1 | 23379 KIAA0947  | R.RAS*PP  | 0.116581414 | 0.88 | S1692 | 1.03 |
| IPI00738216.1 | 23379 KIAA0947  | R.RAS*PP  | 0.401648339 | 0.96 | S1692 | 1.02 |
| IPI00738438.1 |                 | R.S*PMDS  | 0.214968943 | 0.96 | S112  | 1.13 |
| IPI00738634.1 |                 | R.AFAGPL  | 0.197968259 | 0.83 | S298  | 0.92 |
| IPI00738634.1 |                 | R.AFAGPL  | 0.643675939 | 0.96 | S298  | 1    |
| IPI00738634.1 |                 | K.SQLPDL  | 0.401648339 | 0.52 | S666  | 0.55 |
| IPI00738634.1 |                 | R.YGGS*P  | 0.643675939 | 0.98 | S282  | 1.03 |
| IPI00738806.1 | 4648 MYO7B      | K.T*GLVPI | 0.010658547 | 0.98 | T1554 | 0.69 |
| IPI00738974.1 | 344558 SH3MD4   | R.KAGS*LI | 0.946608772 | 0.96 | S797  | 1.16 |
| IPI00739117.2 | 23215 BAT2D1    | R.MLWGS   | 0.49616549  | 0.98 | T822  | 1.06 |
| IPI00739117.2 | 23215 BAT2D1    | R.MLWGS   | 0.49616549  | 1    | T821  | 1.07 |
| IPI00739117.2 | 23215 BAT2D1    | R.SVEDVF  | 0.214968943 | 0.98 | T887  | 1.22 |
| IPI00739117.2 | 23215 BAT2D1    | R.S*VEDV  | 0.106353987 | 0.71 | S878  | 0.94 |
| IPI00739386.1 | 157285 DKFZp761 | K.VSQGS/  | 0.360667889 | 0.86 | S745  | 0.82 |
| IPI00739497.1 |                 | K.SAPTS*F | 9.94E-13    | 0.98 | S376  | 0.23 |
| IPI00739581.1 | 54454 ATAD2B    | R.ENTLFD  | 0.933447376 | 0.96 | S318  | 1.04 |
| IPI00739846.1 |                 | R.FNISSHI | 0.643675939 | 0.98 | S164  | 0.98 |
| IPI00739969.1 | 642995 LOC64299 | R.EVIEIED | 0.877341226 | 0.9  | T1377 | 0.95 |
| IPI00739969.1 | 642995 LOC64299 | K.LTPVSL  | 0.25510468  | 0.96 | S444  | 0.73 |
| IPI00739969.1 | 642995 LOC64299 | K.LTPVSL  | 0.25510468  | 0.96 | S446  | 0.73 |
| IPI00740132.1 |                 | R.KGS*DA  | 0.152571688 | 1    | S23   | 1.14 |
| IPI00740155.1 |                 | K.HSPIKEE | 0.253322457 | 0.96 | S172  | 1.11 |
| IPI00740155.1 |                 | R.KS*PLG  | 0.431601138 | 0.98 | S4    | 0.95 |
| IPI00740178.1 | 9618 TRAF4      | R.GS*LDE  | 0.872720802 | 0.98 | S84   | 1.02 |
| IPI00740185.1 |                 | R.S*LDDL  | 0.831562154 | 0.71 | S246  | 0.83 |
| IPI00740502.1 |                 | K.AEAPAG  | 0.401648339 | 0.86 | S25   | 0.99 |
| IPI00740502.1 |                 | K.AEAPAG  | 0.253322457 | 0.88 | S25   | 0.93 |
| IPI00741088.1 | 254102 EHBP1L1  | R.ANEAGC  | 0.32093792  | 0.96 | S285  | 1.12 |
| IPI00741088.1 | 254102 EHBP1L1  | R.ANEAGC  | 0.296993866 | 0.96 | T284  | 1.12 |
| IPI00741088.1 | 254102 EHBP1L1  | R.KGS*DA  | 0.152571688 | 1    | S310  | 1.14 |
| IPI00741141.1 |                 | K.RNPNTG  | 0.418612999 | 0.88 | S201  | 0.64 |
| IPI00741141.1 |                 | K.RNPNTG  | 0.096380146 | 0.94 | T200  | 0.66 |
| IPI00741141.1 |                 | R.S*ASTS  | 0.197661257 | 0.92 | S615  | 1.09 |
| IPI00741141.1 |                 | R.T*PTSPI | 0.12765804  | 0.92 | T501  | 1.01 |
| IPI00741141.1 |                 | R.TPTS*PI | 0.12765804  | 0.92 | S504  | 1.01 |
| IPI00741141.1 |                 | K.EQAAAL  | 0.643675939 | 0.94 | S408  | 1.12 |
| IPI00741248.1 |                 | R.FYS*SEI | 0.005157186 | 0.88 | S66   | 1.5  |
| IPI00741253.1 |                 | K.LSHS*DI | 0.463105648 | 0.9  | S79   | 0.76 |

|               |                 |           |             |      |         |       |
|---------------|-----------------|-----------|-------------|------|---------|-------|
| IPI00741480.1 |                 | K.S*SPSG  | 0.431601138 | 0.94 | S158    | 1.09  |
| IPI00741480.1 |                 | K.SS*PSG  | 0.431601138 | 0.94 | S159    | 1.09  |
| IPI00741480.1 |                 | K.SSPS*G  | 0.604563646 | 0.94 | S161    | 1.02  |
| IPI00741728.1 |                 | R.S*RGQC  | 0.03282354  | 0.38 | S812    | 0.97  |
| IPI00741728.1 |                 | R.S*KSPLF | 0.431601138 | 0.66 | S383    | 0.96  |
| IPI00741728.1 |                 | R.SKSPLP  | 0.566916624 | 0.07 | T401    | 0.29  |
| IPI00741728.1 |                 | R.SKSPLP  | 0.566916624 | 1    | S410    | 1.04  |
| IPI00741728.1 |                 | R.SKSPLP  | 0.643675939 | 0.98 | T407    | 1.02  |
| IPI00741728.1 |                 | R.SKS*PLF | 0.566916624 | 0.98 | S385    | 1.02  |
| IPI00741728.1 |                 | R.SKSPLP  | 0.604563646 | 0.98 | T409    | 1.02  |
| IPI00741894.1 | 730429 LOC73042 | R.RIS*QSC | 0.106353987 | 0.96 | S1547   | 1.1   |
| IPI00741958.1 | 57673 KIAA1553  | R.INDELE  | 0.89791754  | 0.85 | S489    | 0.91  |
| IPI00742090.1 |                 | K.NLEHLS  | 0.791231585 | 0.94 | S1230   | 0.92  |
| IPI00742124.1 | 26043 UBXD7     | R.SESLID/ | 0.106353987 | 0.76 | S288    | 1.24  |
| IPI00742193.1 | 651771 LOC65177 | R.ALDSGY  | 0           | 0.98 | T714    | 7.76  |
| IPI00742682.1 | 7175 TPR        | R.GIASTSI | 0.054409842 | 0.92 | S1676   | 1.04  |
| IPI00742682.1 | 7175 TPR        | R.ILLSQTT | 0.296993866 | 0.88 | T641    | 1.06  |
| IPI00742682.1 | 7175 TPR        | R.GLQLT*I | 0.166517367 | 0.96 | T2116   | 1.13  |
| IPI00742682.1 | 7175 TPR        | R.TDGFAE  | 0.03282354  | 1    | S2155   | 1.27  |
| IPI00742686.1 |                 | K.LYSILQC | 0.451162192 | 0.92 | T487    | 0.82  |
| IPI00742686.1 |                 | K.LYSILQC | 0.451162192 | 0.92 | S485    | 0.82  |
| IPI00742785.1 |                 | R.SPS*SLI | 0.726073545 | 1    | S586    | 1     |
| IPI00742887.1 | 2113 ETS1       | R.VPSY*D  | 0.152571688 | 0.74 | Y327    | 1.05  |
| IPI00742889.1 |                 | R.SRIPS*F | 0.088241621 | 0.81 | S60     | 1.12  |
| IPI00742905.1 | 1660 DHX9       | K.SEEVPA  | 0.49616549  | 0.76 | S87     | 0.95  |
| IPI00743031.1 | 51720 UIMC1     | R.LLS*FLE | 0.829549043 | 0.83 | S627    | 0.88  |
| IPI00743031.1 | 51720 UIMC1     | R.VPS*PG  | 0.614059792 | 0.67 | S653    | 0.88  |
| IPI00743121.1 | 55627 SMPD4     | K.ASIQECI | 0.822525206 | 0.94 | S169    | 0.97  |
| IPI00743179.1 | 645528 C10orf50 | R.HS*HHH  | 0           | 0.79 | S95     | 20.77 |
| IPI00743510.1 | 79899 FLJ14213  | R.FMS*SP  | 0.530774648 | 0.88 | S28     | 0.96  |
| IPI00743621.1 | 23049 SMG1      | R.S*MSYS  | 2.09E-12    | 0.76 | S140    | 4.38  |
| IPI00743705.1 |                 | R.DPKPSC  | 0           | 0.94 | Not con | 17.2  |
| IPI00743819.1 |                 | K.NREELG  | 0.863736843 | 0.69 | S179    | 0.5   |
| IPI00743879.1 | 89953 KLC4      | R.AAS*LN' | 0.152571688 | 1    | S608    | 1.2   |
| IPI00744075.1 |                 | R.SPSFGC  | 0.78568809  | 0.96 | S270    | 0.94  |
| IPI00744075.1 |                 | R.SPS*FG  | 0.643675939 | 0.94 | S263    | 1.14  |
| IPI00744075.1 |                 | R.DSSFTE  | 0.253322457 | 0.96 | S245    | 1.2   |
| IPI00744075.1 |                 | K.Y*GSFEI | 0.021229856 | 0.85 | Y540    | 0.7   |
| IPI00744125.1 | 1997 ELF1       | R.TIQAPT  | 0.886608864 | 0.94 | S432    | 1.08  |
| IPI00744134.1 | 8161 COIL       | K.LLELTS  | 0.379516392 | 0.69 | S489    | 0.68  |
| IPI00744134.1 | 8161 COIL       | K.LGFSLT' | 0.401648339 | 0.96 | T303    | 1.08  |
| IPI00744134.1 | 8161 COIL       | R.NS*SEK  | 0.684519102 | 0.98 | S271    | 1.01  |
| IPI00744134.1 | 8161 COIL       | R.NSS*EK  | 0.684519102 | 0.98 | S272    | 1.01  |
| IPI00744221.1 | 9855 FARP2      | K.DSSSSL  | 0.072926818 | 0.92 | S439    | 1.45  |
| IPI00744346.1 |                 | R.RLAVPT  | 0.017448313 | 0.81 | T116    | 1.22  |
| IPI00744428.1 | 63898 SH2D4A    | K.RLS*LG/ | 0.066203153 | 0.94 | S261    | 1.02  |
| IPI00744551.1 | 23332 CLASP1    | K.FSFRS*( | 0.401648339 | 0.98 | S1152   | 1.08  |
| IPI00744551.1 | 23332 CLASP1    | K.FS*FRS( | 0.401648339 | 0.98 | S1149   | 1.08  |
| IPI00744551.1 | 23332 CLASP1    | R.RQS*SG  | 0.12765804  | 0.98 | S646    | 1.21  |
| IPI00744551.1 | 23332 CLASP1    | K.NSSNTS  | 0.643675939 | 0.9  | S1086   | 1.04  |
| IPI00744551.1 | 23332 CLASP1    | R.TSPLTS  | 0.32093792  | 0.85 | S1118   | 1.29  |



|               |                  |            |             |            |      |
|---------------|------------------|------------|-------------|------------|------|
| IPI00744551.1 | 23332 CLASP1     | R.SRS*DIE  | 0.32093792  | 0.98 S369  | 1.13 |
| IPI00744561.1 | 3493 IGHA1       | R.VT*ISVD  | 0.346340474 | 1 T89      | 1.12 |
| IPI00744563.1 |                  | K.VRGP/    | 8.07E-10    | 0.94 S91   | 2.61 |
| IPI00744577.1 | 84142 CCDC98     | K.GFGEYS   | 0.463105648 | 0.9 S297   | 1.01 |
| IPI00744607.1 |                  | R.IGELGAI  | 0.373234869 | 0.92 S139  | 1.23 |
| IPI00744707.1 | 22828 RBM16      | K.SSEPVK   | 0.152571688 | 0.96 S619  | 0.92 |
| IPI00744735.1 | 375337 FLJ36157  | R.NSVT*P'  | 0.703604632 | 0.98 T752  | 0.96 |
| IPI00744851.1 | 1832 DSP         | R.S*SSFSI  | 0.431601138 | 0.86 S2006 | 0.86 |
| IPI00744851.1 | 1832 DSP         | R.SMS*FQ   | 0.096924105 | 0.85 S1609 | 1.15 |
| IPI00744851.1 | 1832 DSP         | K.GLPS*P'  | 0.530774648 | 0.96 S2215 | 0.97 |
| IPI00744851.1 | 1832 DSP         | R.RAS*S*P' | 0.253322457 | 1 S165     | 1.1  |
| IPI00744851.1 | 1832 DSP         | R.KQPPVS   | 0.836096036 | 0.98 S36   | 0.83 |
| IPI00744851.1 | 1832 DSP         | K.GLPSPY   | 0.139636808 | 1 S2221    | 1.2  |
| IPI00744851.1 | 1832 DSP         | K.GLPSPY   | 0.139636808 | 1 S2225    | 1.2  |
| IPI00744851.1 | 1832 DSP         | R.KQPPVS   | 0.166517367 | 1 S36      | 1.18 |
| IPI00744851.1 | 1832 DSP         | R.KQPPVS   | 0.166517367 | 1 S36      | 1.18 |
| IPI00744851.1 | 1832 DSP         | R.KQPPVS   | 0.566916624 | 1 S36      | 1.01 |
| IPI00744851.1 | 1832 DSP         | R.SSSFS*I  | 0.463105648 | 0.98 S2010 | 1.05 |
| IPI00744851.1 | 1832 DSP         | R.SSSFSD   | 0.431601138 | 0.98 T2012 | 1.06 |
| IPI00744888.1 |                  | R.KIQSSL'  | 0.32093792  | 0.9 S529   | 1.05 |
| IPI00744935.1 |                  | K.RKYS*E'  | 0.296993866 | 0.9 S28    | 1.15 |
| IPI00744935.1 |                  | K.RKYSEV   | 0.072926818 | 0.98 S36   | 1.12 |
| IPI00744935.1 |                  | R.KYS*EVI  | 0.990601784 | 0.96 S28   | 0.96 |
| IPI00745134.1 |                  | K.LSGNTH   | 0.049260986 | 0.83 S728  | 1.19 |
| IPI00745230.1 | 5980 REV3L       | K.ALNGDC   | 0.49616549  | 0.62 S2068 | 0.78 |
| IPI00745230.1 | 5980 REV3L       | K.ALNGDC   | 0.947647721 | 0.71 S2069 | 0.96 |
| IPI00745236.1 |                  | K.KLNLTL   | 0.32093792  | 0.94 T565  | 1.03 |
| IPI00745236.1 |                  | K.KLNLTL'  | 0.296993866 | 0.94 S567  | 1.03 |
| IPI00745274.1 |                  | R.RAGDPC   | 0.035018133 | 0.92 S1400 | 0.81 |
| IPI00745321.1 |                  | K.GGLTS*I  | 0.373234869 | 0.92 S248  | 1.03 |
| IPI00745321.1 |                  | R.SHGLEF   | 0.040276449 | 0.98 S52   | 1.28 |
| IPI00745321.1 |                  | R.LSLSPA   | 0.214968943 | 0.98 S1112 | 1.11 |
| IPI00745321.1 |                  | R.LSLSPA   | 0.214968943 | 0.98 S1108 | 1.15 |
| IPI00745375.1 | 140688 C20orf112 | K.GGASTT   | 0.566916624 | 0.94 T402  | 0.94 |
| IPI00745540.1 | 152518 NFXL1     | R.HS*PAG   | 0.900575286 | 0.98 S65   | 0.93 |
| IPI00745540.1 | 152518 NFXL1     | R.HSPAGE   | 0.900575286 | 0.98 S69   | 0.93 |
| IPI00745557.1 | 26057 ANKRD17    | K.EHYPVS   | 0.197661257 | 0.96 S2051 | 0.94 |
| IPI00745557.1 | 26057 ANKRD17    | K.EHYPVS   | 0.12765804  | 0.96 S2053 | 0.94 |
| IPI00745557.1 | 26057 ANKRD17    | K.EHYPVS   | 0.000618432 | 0.88 S2048 | 1.06 |
| IPI00745557.1 | 26057 ANKRD17    | K.EHYPVS   | 0.000618432 | 0.88 S2047 | 1.06 |
| IPI00745557.1 | 26057 ANKRD17    | K.EHYPVS   | 0.106353987 | 0.92 S2047 | 1.08 |
| IPI00745557.1 | 26057 ANKRD17    | K.EHYPVS   | 0.181528891 | 0.96 S2051 | 1.18 |
| IPI00745557.1 | 26057 ANKRD17    | R.APS*PAI  | 0.27446972  | 0.9 S2407  | 1.1  |
| IPI00745557.1 | 26057 ANKRD17    | K.EHYPVS   | 0.197661257 | 0.96 S2048 | 1.17 |
| IPI00745557.1 | 26057 ANKRD17    | K.EHYPVS   | 0.152571688 | 0.98 S2048 | 1.17 |
| IPI00745564.1 | 4609 MYC         | R.SGLCS*   | 0.447034483 | 0.96 S71   | 0.66 |
| IPI00745767.1 | 1186 CLCN7       | R.VGHMS'   | 0.233505398 | 0.98 S60   | 1.27 |
| IPI00745885.1 |                  | R.MLLS*P'  | 0.730331964 | 1 S163     | 1.04 |
| IPI00746051.1 | 55604 LRRC16     | R.RS*WGC   | 0.106353987 | 0.96 S505  | 0.99 |
| IPI00746051.1 | 55604 LRRC16     | K.GAVRS*   | 0.024009318 | 0.81 S320  | 1    |
| IPI00746051.1 | 55604 LRRC16     | R.S*WGQC   | 0.431601138 | 0.92 S505  | 0.94 |

|               |        |          |           |             |      |       |      |
|---------------|--------|----------|-----------|-------------|------|-------|------|
| IPI00746051.1 | 55604  | LRRC16   | R.SKSERF  | 0.684519102 | 0.81 | S313  | 1.18 |
| IPI00746051.1 | 55604  | LRRC16   | R.SKSERF  | 0.771113571 | 0.85 | S312  | 1.05 |
| IPI00746051.1 | 55604  | LRRC16   | K.SERPPT  | 0.373234869 | 1    | S312  | 1.14 |
| IPI00746051.1 | 55604  | LRRC16   | K.SERPPT  | 0.253322457 | 1    | S313  | 1.14 |
| IPI00746124.1 | 55117  | SLC6A15  | R.VLKEPV  | 0.49616549  | 0.98 | S337  | 1.03 |
| IPI00746124.1 | 55117  | SLC6A15  | R.VLKEPV  | 0.463105648 | 0.96 | T336  | 1.09 |
| IPI00746168.1 | 22821  | RASA3    | K.YGSQEF  | 0.643675939 | 0.96 | S818  | 1.07 |
| IPI00746168.1 | 22821  | RASA3    | R.HLS*FYI | 0.233505398 | 0.94 | S77   | 1.26 |
| IPI00746168.1 | 22821  | RASA3    | K.YHNRDT  | 0.751811379 | 0.98 | T110  | 1.12 |
| IPI00746168.1 | 22821  | RASA3    | R.KTNNPC  | 0.152571688 | 0.88 | S207  | 1.2  |
| IPI00746184.1 |        |          | R.RKS*ELI | 0.152571688 | 0.98 | S72   | 1.01 |
| IPI00746184.1 |        |          | R.VSS*QA  | 0.060044376 | 0.92 | S179  | 1.1  |
| IPI00746221.1 | 348262 | LOC34826 | R.TSSPRS  | 0.604563646 | 0.85 | S21   | 1.17 |
| IPI00746301.1 | 6792   | CDKL5    | R.SNS*KD  | 0.990159288 | 0.94 | S343  | 1.08 |
| IPI00746301.1 | 6792   | CDKL5    | R.S*NSKD  | 0.990159288 | 0.94 | S341  | 1.08 |
| IPI00746301.1 | 6792   | CDKL5    | K.DLTNNN  | 0.684201094 | 0.96 | S407  | 1.04 |
| IPI00746398.1 | 55667  | DENND4C  | R.SS*PHG  | 0.809048575 | 0.98 | S1097 | 1.02 |
| IPI00746398.1 | 55667  | DENND4C  | R.S*SPHG  | 0.604563646 | 0.98 | S1096 | 1.02 |
| IPI00746398.1 | 55667  | DENND4C  | R.RSS*LPI | 0.00181541  | 0.96 | S1042 | 1.28 |
| IPI00746398.1 | 55667  | DENND4C  | K.RSS*LYC | 0.214968943 | 1    | S948  | 1.15 |
| IPI00746398.1 | 55667  | DENND4C  | R.STS*LS/ | 0.233505398 | 0.96 | S1089 | 1.23 |
| IPI00746398.1 | 55667  | DENND4C  | R.EDVETC  | 0.05939869  | 0.85 | T980  | 0.62 |
| IPI00746398.1 | 55667  | DENND4C  | R.NLADEIF | 0.431601138 | 0.96 | S1008 | 1.05 |
| IPI00746398.1 | 55667  | DENND4C  | K.TPDSER  | 0.27446972  | 0.96 | S989  | 1.21 |
| IPI00746398.1 | 55667  | DENND4C  | R.SSPHGE  | 0.627992512 | 0.92 | S1110 | 0.11 |
| IPI00746398.1 | 55667  | DENND4C  | R.THS*FEI | 0.233505398 | 0.01 | S863  | 0.05 |
| IPI00746412.1 | 9169   | SFRS2IP  | R.FHSPST  | 0.834430989 | 0.94 | T799  | 1    |
| IPI00746412.1 | 9169   | SFRS2IP  | R.FHS*PS  | 0.975679369 | 0.94 | S796  | 0.99 |
| IPI00746412.1 | 9169   | SFRS2IP  | R.FHSPS*  | 0.756570768 | 0.79 | S798  | 0.99 |
| IPI00746412.1 | 9169   | SFRS2IP  | K.TEELIES | 0.32093792  | 0.81 | S608  | 0.53 |
| IPI00746412.1 | 9169   | SFRS2IP  | R.FHS*PS  | 0.966676636 | 0.98 | S796  | 0.88 |
| IPI00746412.1 | 9169   | SFRS2IP  | K.HFSEDN  | 0.566916624 | 0.85 | S731  | 1.16 |
| IPI00746412.1 | 9169   | SFRS2IP  | R.FHSPST  | 0.459466751 | 0.96 | S802  | 1.15 |
| IPI00746412.1 | 9169   | SFRS2IP  | R.FHSPST  | 0.459466751 | 0.96 | T800  | 1.15 |
| IPI00746412.1 | 9169   | SFRS2IP  | R.FHS*PS  | 0.431601138 | 1    | S796  | 1.09 |
| IPI00746412.1 | 9169   | SFRS2IP  | R.FHS*PS  | 0.463105648 | 1    | S796  | 1.09 |
| IPI00746412.1 | 9169   | SFRS2IP  | R.S*PISDN | 0.73460299  | 0.98 | S338  | 1.04 |
| IPI00746412.1 | 9169   | SFRS2IP  | R.AETASC  | 0.530774648 | 0.96 | S338  | 0.98 |
| IPI00746412.1 | 9169   | SFRS2IP  | K.T*EELIE | 0.296993866 | 0.98 | T602  | 1.1  |
| IPI00746412.1 | 9169   | SFRS2IP  | R.FHS*PS  | 0.99978897  | 0.98 | S796  | 0.93 |
| IPI00746475.1 | 9024   | BRSK2    | R.TRSSGA  | 0.181528891 | 1    |       | 1.18 |
| IPI00746523.1 | 29068  | ZBTB44   | R.KSYIVM  | 0.214968943 | 0.94 | S194  | 1.09 |
| IPI00746614.1 |        |          | R.DRDYSI  | 0.530774648 | 0.37 | S264  | 0.84 |
| IPI00746614.1 |        |          | K.AIKEVQ  | 0.04505155  | 0.81 | S75   | 0.99 |
| IPI00746614.1 |        |          | R.RDVYLS  | 0.12765804  | 1    | S195  | 1.3  |
| IPI00746614.1 |        |          | R.DYGHS*  | 0.214968943 | 0.96 | S236  | 1.32 |
| IPI00746614.1 |        |          | R.DYGHS   | 0.12765804  | 0.96 | S237  | 1.32 |
| IPI00746614.1 |        |          | R.DS*YSS  | 0.604563646 | 0.98 | S313  | 1.14 |
| IPI00746614.1 |        |          | R.DSYSSS  | 0.604563646 | 0.98 | S319  | 1.14 |
| IPI00746614.1 |        |          | K.VEQATK  | 0.166517367 | 1    | S75   | 1.22 |
| IPI00746655.1 | 23344  | FAM62A   | R.LTHVDS  | 0.530774648 | 0.79 | S973  | 0.87 |

|               |        |          |           |             |      |         |       |
|---------------|--------|----------|-----------|-------------|------|---------|-------|
| IPI00746678.1 | 146050 | ZSCAN29  | R.ARS*PD  | 0.106353987 | 0.37 | S33     | 0.51  |
| IPI00746695.1 |        |          | R.RNSSS*  | 0.066203153 | 0.98 | S286    | 1.22  |
| IPI00746695.1 |        |          | K.RKAS*PI | 0.072926818 | 0.86 | S174    | 1.18  |
| IPI00746695.1 |        |          | R.RNS*SS  | 0.233505398 | 1    | S284    | 1.14  |
| IPI00746695.1 |        |          | K.RKASPE  | 0.27446972  | 0.98 | S180    | 1.14  |
| IPI00746695.1 |        |          | R.RNS*SS  | 0.139636808 | 1    | S284    | 1.21  |
| IPI00746695.1 |        |          | R.KAS*PEI | 0.181528891 | 1    | S174    | 1.12  |
| IPI00746731.1 |        |          | R.YSVLNN  | 0.401648339 | 0.83 | S42     | 1     |
| IPI00746737.1 |        |          | K.IPLFNTC | 0.116581414 | 0.92 | T610    | 1.09  |
| IPI00747179.1 | 10848  | PPP1R13L | R.NYKVS*  | 0.014056191 | 0.94 | S316    | 1.38  |
| IPI00747179.1 | 10848  | PPP1R13L | R.NYKVSF  | 0.014056191 | 0.94 | S320    | 1.38  |
| IPI00747179.1 | 10848  | PPP1R13L | R.NYKVS*  | 0.12765804  | 0.66 | S316    | 1.08  |
| IPI00747179.1 | 10848  | PPP1R13L | R.SESAPT  | 0.566916624 | 0.79 | Y109    | 0.97  |
| IPI00747179.1 | 10848  | PPP1R13L | R.SESAPT  | 0.27446972  | 0.94 | S113    | 1.2   |
| IPI00747361.1 | 8086   | AAAS     | R.FS*PVL  | 0.296993866 | 0.98 | S462    | 1.19  |
| IPI00747496.1 | 285172 | FAM126B  | K.HLS*LPA | 0.32093792  | 0.98 | S430    | 1.04  |
| IPI00747571.1 |        |          | R.WISLLS' | 0.009053635 | 0.96 | Not con | 1.46  |
| IPI00747787.1 | 23310  | NCAPD3   | R.ASAGH\  | 0.791231585 | 0.92 | S1329   | 1.12  |
| IPI00747787.1 | 23310  | NCAPD3   | R.SRS*LG' | 0.253322457 | 0.86 | S1372   | 0.92  |
| IPI00747787.1 | 23310  | NCAPD3   | R.SRS*LG' | 0.253322457 | 0.86 | S1372   | 0.92  |
| IPI00747787.1 | 23310  | NCAPD3   | R.SLGVLP  | 0.373234869 | 0.98 | S1384   | 1.09  |
| IPI00747819.1 | 4038   | LRP4     | R.RGS*LP  | 0.431601138 | 0.98 | S1887   | 1.03  |
| IPI00747970.1 | 7994   | MYST3    | R.RLS*SQ  | 0.971449831 | 0.98 | S669    | 1.03  |
| IPI00747970.1 | 7994   | MYST3    | R.RLS*EG' | 0.296993866 | 0.98 | S104    | 1.11  |
| IPI00747973.1 | 25425  | LCORL    | K.IECSGP' | 0.049260986 | 0.85 | S401    | 1.08  |
| IPI00747986.1 | 80728  | KIAA1688 | R.AFS*EDI | 0.296993866 | 0.98 | S604    | 1.09  |
| IPI00747999.1 |        |          | R.RQFS*A  | 0.001128958 | 0.92 | S1141   | 1.28  |
| IPI00748143.1 | 1894   | ECT2     | R.LSSTSS  | 0.684201094 | 0.86 | S860    | 0.89  |
| IPI00748143.1 | 1894   | ECT2     | R.LSSTSS  | 0.684201094 | 0.86 | S858    | 0.89  |
| IPI00748311.1 |        |          | R.LAERLS  | 0.205975059 | 0.86 | S189    | 0.83  |
| IPI00748592.1 | 27341  | CTA-126B | R.IPS*PLG | 0.27446972  | 0.85 | S19     | 0.96  |
| IPI00748592.1 | 27341  | CTA-126B | R.LLSTCG  | 0.346340474 | 0.96 | S103    | 1.27  |
| IPI00748592.1 | 27341  | CTA-126B | R.DPEDRI  | 0.009053635 | 0.94 | Y23     | 1.27  |
| IPI00748592.1 | 27341  | CTA-126B | R.LLSTCG  | 0.49616549  | 0.98 | S99     | 0.98  |
| IPI00748604.1 | 1386   | ATF2     | R.TQS*EE: | 0.253322457 | 0.98 | S131    | 1.13  |
| IPI00748604.1 | 1386   | ATF2     | R.T*QSEE: | 0.197661257 | 0.98 | T305    | 1.18  |
| IPI00748604.1 | 1386   | ATF2     | R.TQSEES  | 0.233505398 | 0.98 | S328    | 1.07  |
| IPI00748604.1 | 1386   | ATF2     | K.MPLDLS  | 0.106353987 | 0.92 | S112    | 1.22  |
| IPI00748604.1 | 1386   | ATF2     | R.T*QSEE: | 0.253322457 | 1    | T305    | 1.16  |
| IPI00748715.1 | 10801  | 39334    | R.AEVLGH  | 0.214968943 | 0.92 | T124    | 0.91  |
| IPI00748715.1 | 10801  | 39334    | R.RVQT*P  | 0.066203153 | 0.96 | T31     | 1     |
| IPI00748758.1 | 81928  | CABLES2  | R.TPAPQC  | 0.346340474 | 0.85 | T107    | 1.02  |
| IPI00748758.1 | 81928  | CABLES2  | R.T*PAPQ  | 0.346340474 | 0.85 | T97     | 1.02  |
| IPI00748783.1 | 7222   | TRPC3    | K.LNPS*M  | 0           | 0.96 | S843    | 0.05  |
| IPI00748878.1 | 79684  | C11orf61 | R.GASPLG  | 0.242972405 | 0.55 | S54     | 1.2   |
| IPI00748878.1 | 79684  | C11orf61 | K.SPGLYA  | 0.431601138 | 0.98 | S391    | 1.13  |
| IPI00748878.1 | 79684  | C11orf61 | K.SPGLYA  | 0.346340474 | 0.98 | S384    | 1.13  |
| IPI00748878.1 | 79684  | C11orf61 | R.GAS*PL  | 0.296993866 | 0.98 | S48     | 1.01  |
| IPI00748916.1 | 139818 | DOCK11   | R.T*VQS*T | 0           | 0.64 | T83     | 45.46 |
| IPI00748920.1 |        |          | R.SRS*PL  | 0.026666866 | 0.88 | S2046   | 1.52  |
| IPI00748920.1 |        |          | R.T*PQAP  | 0.253322457 | 0.81 | T2329   | 1.04  |

|               |              |           |             |      |       |      |
|---------------|--------------|-----------|-------------|------|-------|------|
| IPI00748920.1 |              | R.DRS*PP  | 0.039790008 | 0.94 | S404  | 0.67 |
| IPI00748920.1 |              | K.TVART*F | 0.088241621 | 0.92 | T1531 | 1.19 |
| IPI00748920.1 |              | R.SRT*PP  | 0.431601138 | 0.96 | T2409 | 1.08 |
| IPI00748920.1 |              | K.THTTAL  | 0.401648339 | 0.98 | S295  | 1.05 |
| IPI00748920.1 |              | K.AGMSS   | 0.463105648 | 0.96 | S1404 | 1.07 |
| IPI00748920.1 |              | K.DKFSPF  | 0.813530126 | 0.94 | S1199 | 1.01 |
| IPI00748920.1 |              | K.DKFS*PI | 0.684201094 | 0.98 | S1188 | 0.97 |
| IPI00748920.1 |              | K.AQT*PP  | 0.373234869 | 1    | T1003 | 1.07 |
| IPI00748920.1 |              | R.KPIDSLF | 0.106353987 | 0.98 | S2688 | 1.19 |
| IPI00748920.1 |              | R.CRS*PG  | 0.431601138 | 1    | S2132 | 1.08 |
| IPI00748920.1 |              | R.RGEGD   | 0.32093792  | 1    | S322  | 1.06 |
| IPI00748920.1 |              | R.RGEGD   | 0.296993866 | 1    | S323  | 1.06 |
| IPI00748920.1 |              | R.MGQAP   | 0.296993866 | 0.96 | S2449 | 1.19 |
| IPI00748920.1 |              | R.HGGS*P  | 0.346340474 | 0.05 | S377  | 0.8  |
| IPI00748920.1 |              | R.VSGRTE  | 0.530774648 | 1    | S2398 | 1.04 |
| IPI00748920.1 |              | R.MAPALS  | 0.40669332  | 0.76 | S2382 | 0.92 |
| IPI00748920.1 |              | R.TPAAAA  | 0.27446972  | 1    | S2272 | 1.13 |
| IPI00748953.1 | 79595 SAP130 | K.VVPQQI  | 0.845194016 | 0.98 | S442  | 1    |
| IPI00748953.1 | 79595 SAP130 | K.RKS*PPI | 0.181528891 | 0.64 | S875  | 0.88 |
| IPI00748953.1 | 79595 SAP130 | K.RKSPPK  | 0.116581414 | 0.9  | Y880  | 1.23 |
| IPI00749034.1 | 7410 VAV2    | R.ASS*RS  | 0.49616549  | 0.79 | S770  | 1.3  |
| IPI00749034.1 | 7410 VAV2    | R.ASSRS*  | 0.49616549  | 0.94 | S772  | 1.2  |
| IPI00749141.1 |              | K.SNLNVM  | 0.011294655 | 0.96 | S743  | 1.15 |
| IPI00749141.1 |              | K.SNLNVM  | 0.011294655 | 0.96 | S746  | 1.15 |
| IPI00749429.1 | 80727 TTYH3  | K.YLATSQ  | 0.096924105 | 0.92 | S519  | 1.21 |
| IPI00749429.1 | 80727 TTYH3  | K.YLATSQ  | 0.795669231 | 0.98 | S522  | 0.95 |
| IPI00749486.1 | 51780 JMJD1B | R.T*PENH  | 0.106353987 | 0.88 | T270  | 1.13 |
| IPI00749486.1 | 51780 JMJD1B | R.SSSPTS  | 0.401648339 | 0.94 | S400  | 1.1  |
| IPI00749486.1 | 51780 JMJD1B | R.HSGGFL  | 0.49616549  | 0.96 | S435  | 0.94 |
| IPI00749486.1 | 51780 JMJD1B | R.SSSPTS  | 0.253322457 | 0.88 | S386  | 1.01 |
| IPI00749486.1 | 51780 JMJD1B | R.SSSPTS  | 0.401648339 | 0.96 | T389  | 1.12 |

| Regression factor | Intensity1 | Intensity2 | Area ratio |
|-------------------|------------|------------|------------|
| 0.78              | 2288632    | 6361524    | 0.36       |
| 0.98              | 2201357    | 1922374    | 1.15       |
| 0.99              | 5644064    | 4663433    | 1.21       |
| 1                 | 9358042    | 7416281    | 1.26       |
| 0.94              | 2.34E+07   | 1.98E+07   | 1.18       |
| 1                 | 3.60E+07   | 2.92E+07   | 1.23       |
| 0.95              | 1321932    | 1363514    | 0.97       |
| 0.84              | 3672874    | 2906457    | 1.26       |
| 0.96              | 1.42E+07   | 8647939    | 1.64       |
| 1                 | 1.42E+07   | 1.27E+07   | 1.12       |
| 1                 | 1.42E+07   | 1.27E+07   | 1.12       |
| 0.88              | 2061332    | 2943936    | 0.70       |
| 0.91              | 3021620    | 3800246    | 0.80       |
| 0.92              | 19499      | 55550      | 0.35       |
| 0.82              | 5906654    | 1.19E+07   | 0.50       |
| 0.71              | 4043286    | 1792602    | 2.26       |
| 0.96              | 1870837    | 2312312    | 0.81       |
| 0.96              | 9178173    | 9009658    | 1.02       |
| 0.99              | 1.01E+07   | 9177404    | 1.10       |
| 0.96              | 4.50E+07   | 3.52E+07   | 1.28       |
| 0.96              | 4.50E+07   | 3.52E+07   | 1.28       |
| 0.96              | 7137189    | 7014656    | 1.02       |
| 0.71              | 1446573    | 1251004    | 1.16       |
| 0.94              | 945663     | 898580     | 1.05       |
| 0.84              | 3402157    | 4061075    | 0.84       |
| 0.95              | 549336     | 470953     | 1.17       |
| 0.9               | 4184461    | 3455345    | 1.21       |
| 0.98              | 4408608    | 3608701    | 1.22       |
| 0.77              | 1.35E+07   | 7760266    | 1.74       |
| 0.98              | 2500717    | 2388581    | 1.05       |
| 1                 | 1.22E+07   | 1.04E+07   | 1.17       |
| 0.98              | 1349221    | 1345166    | 1.00       |
| 0.98              | 2326676    | 2402771    | 0.97       |
| 0.93              | 2698104    | 2419675    | 1.12       |
| 0.99              | 4213839    | 3993398    | 1.06       |
| 0.99              | 4213839    | 3993398    | 1.06       |
| 0.99              | 4899990    | 4798266    | 1.02       |
| 0.99              | 4899990    | 4798266    | 1.02       |
| 0.99              | 7574905    | 7473733    | 1.01       |
| 0.99              | 8170744    | 7888628    | 1.04       |
| 1                 | 1.54E+07   | 1.37E+07   | 1.12       |
| 1                 | 1.52E+07   | 1.42E+07   | 1.07       |
| 1                 | 2.51E+07   | 2.35E+07   | 1.07       |
| 1                 | 2.73E+07   | 2.50E+07   | 1.09       |
| 1                 | 4.68E+07   | 4.39E+07   | 1.07       |
| 0.84              | 6103706    | 7542429    | 0.81       |
| 0.96              | 1.01E+07   | 8480776    | 1.19       |
| 1                 | 2.08E+07   | 1.76E+07   | 1.18       |
| 1                 | 2.08E+07   | 1.76E+07   | 1.18       |
| 0.98              | 5242160    | 5081452    | 1.03       |

|      |          |          |      |
|------|----------|----------|------|
| 0.96 | 7219387  | 2342478  | 3.08 |
| 0.94 | 1.14E+07 | 1.18E+07 | 0.97 |
| 0.91 | 780735   | 966434   | 0.81 |
| 0.99 | 2.41E+07 | 1.98E+07 | 1.22 |
| 0.92 | 1006970  | 1323713  | 0.76 |
| 0.96 | 6376327  | 6291505  | 1.01 |
| 0.99 | 3674806  | 3676813  | 1.00 |
| 0.99 | 3674806  | 3676813  | 1.00 |
| 0.98 | 2.21E+07 | 2.14E+07 | 1.03 |
| 1    | 3.02E+07 | 2.62E+07 | 1.15 |
| 1    | 1.09E+08 | 9.89E+07 | 1.10 |
| 1    | 1.24E+08 | 1.24E+08 | 1.00 |
| 1    | 2587225  | 2646258  | 0.98 |
| 1    | 9969412  | 9875815  | 1.01 |
| 0.98 | 888901   | 680090   | 1.31 |
| 0.9  | 6914814  | 6404399  | 1.08 |
| 0.94 | 2014614  | 1902028  | 1.06 |
| 0.98 | 3494846  | 2977618  | 1.17 |
| 0.98 | 3494846  | 2977618  | 1.17 |
| 0.99 | 3445581  | 3151531  | 1.09 |
| 0.99 | 1.28E+07 | 1.16E+07 | 1.10 |
| 1    | 1.64E+07 | 1.61E+07 | 1.02 |
| 1    | 2.84E+07 | 2.64E+07 | 1.08 |
| 0.99 | 6.06E+07 | 5.71E+07 | 1.06 |
| 0.97 | 4643744  | 4985384  | 0.93 |
| 0.98 | 9214836  | 7347214  | 1.25 |
| 0.97 | 1.73E+07 | 1.38E+07 | 1.25 |
| 0.97 | 1.73E+07 | 1.38E+07 | 1.25 |
| 0.71 | 1.83E+07 | 1.76E+07 | 1.04 |
| 0.04 | 1.53E+07 | 1.92E+07 | 0.80 |
| 1    | 2.49E+07 | 2.13E+07 | 1.17 |
| 0.97 | 2.53E+07 | 2.45E+07 | 1.03 |
| 1    | 3.16E+07 | 3.17E+07 | 1.00 |
| 0.99 | 3.72E+07 | 3.77E+07 | 0.99 |
| 0.99 | 6.15E+07 | 6.09E+07 | 1.01 |
| 0.55 | 6.48E+07 | 6.24E+07 | 1.04 |
| 1    | 1.49E+08 | 1.19E+08 | 1.25 |
| 1    | 6.79E+08 | 6.81E+08 | 1.00 |
| 0.96 | 659979   | 623134   | 1.06 |
| 0.98 | 2299161  | 2204584  | 1.04 |
| 0.81 | 2154454  | 2036729  | 1.06 |
| 0.96 | 3445480  | 3449667  | 1.00 |
| 0.98 | 1.65E+07 | 1.82E+07 | 0.91 |
| 0.89 | 5245739  | 1.23E+07 | 0.43 |
| 0.8  | 2878116  | 498640   | 5.77 |
| 0.96 | 3645219  | 4028542  | 0.90 |
| 0.98 | 8011023  | 7365598  | 1.09 |
| 0.98 | 8011023  | 7365598  | 1.09 |
| 0.98 | 9483853  | 7845311  | 1.21 |
| 0.94 | 6558071  | 7759110  | 0.85 |
| 0.96 | 8709945  | 8304665  | 1.05 |

|      |          |          |      |
|------|----------|----------|------|
| 0.98 | 1.32E+07 | 9366130  | 1.41 |
| 0.97 | 3011537  | 3343870  | 0.90 |
| 0.97 | 3011537  | 3343870  | 0.90 |
| 0.63 | 3.13E+07 | 4.29E+07 | 0.73 |
| 0.79 | 1.69E+07 | 1.26E+07 | 1.34 |
| 0.79 | 1.69E+07 | 1.26E+07 | 1.34 |
| 0.99 | 7706647  | 7081331  | 1.09 |
| 0.76 | 5.55E+07 | 3.42E+07 | 1.62 |
| 0.76 | 5.55E+07 | 3.42E+07 | 1.62 |
| 0.99 | 1699813  | 3447735  | 0.49 |
| 0.91 | 5451202  | 4791501  | 1.14 |
| 0.98 | 721164   | 2308997  | 0.31 |
| 0.96 | 1724452  | 1476697  | 1.17 |
| 0.99 | 2745415  | 2376059  | 1.16 |
| 0.94 | 5332746  | 4803109  | 1.11 |
| 1    | 1.63E+07 | 1.20E+07 | 1.36 |
| 0.96 | 9913413  | 9956856  | 1.00 |
| 0.98 | 6.77E+07 | 6.13E+07 | 1.10 |
| 0.97 | 483634   | 567757   | 0.85 |
| 1    | 4.30E+08 | 3.90E+08 | 1.10 |
| 1    | 4.61E+08 | 4.17E+08 | 1.11 |
| 0.91 | 3.16E+07 | 3972281  | 7.96 |
| 0.92 | 2221149  | 2068944  | 1.07 |
| 0.91 | 6245341  | 4374209  | 1.43 |
| 1    | 5913805  | 4619267  | 1.28 |
| 0.99 | 6844702  | 6339254  | 1.08 |
| 1    | 3.72E+07 | 2.66E+07 | 1.40 |
| 1    | 3.72E+07 | 2.66E+07 | 1.40 |
| 0.99 | 3.84E+07 | 3.37E+07 | 1.14 |
| 0.99 | 3.84E+07 | 3.37E+07 | 1.14 |
| 1    | 8.36E+07 | 8.47E+07 | 0.99 |
| 0.97 | 3414657  | 2970320  | 1.15 |
| 0.99 | 1.82E+07 | 1.63E+07 | 1.12 |
| 0.99 | 1.82E+07 | 1.63E+07 | 1.12 |
| 1    | 2528672  | 2528672  | 1.00 |
| 0.95 | 1178493  | 1338860  | 0.88 |
| 0.95 | 1178493  | 1338860  | 0.88 |
| 0.93 | 1.04E+07 | 1.19E+07 | 0.87 |
| 0.85 | 1994280  | 1197233  | 1.67 |
| 0.99 | 4542222  | 4202716  | 1.08 |
| 0.99 | 5897317  | 5035663  | 1.17 |
| 0.87 | 7666111  | 6479731  | 1.18 |
| 0.87 | 7666111  | 6479731  | 1.18 |
| 0.96 | 7408897  | 6538392  | 1.13 |
| 0.94 | 6227492  | 6747453  | 0.92 |
| 0.83 | 1.60E+07 | 3.23E+07 | 0.50 |
| 0.97 | 1.20E+08 | 1.27E+08 | 0.94 |
| 0.94 | 1835743  | 1781311  | 1.03 |
| 0.94 | 1835743  | 1781311  | 1.03 |
| 0.97 | 2969474  | 2851888  | 1.04 |
| 0.97 | 2969474  | 2851888  | 1.04 |

|      |          |          |      |
|------|----------|----------|------|
| 0.82 | 3748817  | 3704865  | 1.01 |
| 0.92 | 1452219  | 1550240  | 0.94 |
| 0.94 | 3543920  | 2629336  | 1.35 |
| 0.98 | 1.77E+07 | 1.48E+07 | 1.20 |
| 0.98 | 3.32E+07 | 3.88E+07 | 0.86 |
| 0.99 | 5451332  | 5411528  | 1.01 |
| 0.99 | 2798159  | 2470612  | 1.13 |
| 0.85 | 2693458  | 2792114  | 0.96 |
| 0.93 | 2412260  | 2859953  | 0.84 |
| 0.85 | 6130521  | 6959555  | 0.88 |
| 0.92 | 5.28E+07 | 4.88E+07 | 1.08 |
| 0.91 | 7489953  | 8488070  | 0.88 |
| 0.99 | 2.35E+07 | 2.54E+07 | 0.93 |
| 0.99 | 1.57E+08 | 1.53E+08 | 1.03 |
| 1    | 4326301  | 4409001  | 0.98 |
| 0.97 | 571747   | 1.14E+07 | 0.05 |
| 0.9  | 1.84E+07 | 1.80E+07 | 1.02 |
| 0.98 | 3.10E+07 | 2.56E+07 | 1.21 |
| 0.98 | 3.10E+07 | 2.56E+07 | 1.21 |
| 0.96 | 1127555  | 1212381  | 0.93 |
| 0.98 | 7.23E+07 | 5.42E+07 | 1.33 |
| 0.92 | 4077594  | 3415780  | 1.19 |
| 0.9  | 5953823  | 5276014  | 1.13 |
| 0.9  | 5953823  | 5276014  | 1.13 |
| 0.92 | 8637242  | 7831218  | 1.10 |
| 0.96 | 1.02E+07 | 9896554  | 1.03 |
| 0.98 | 1.31E+07 | 1.13E+07 | 1.16 |
| 0.96 | 2.72E+07 | 2.47E+07 | 1.10 |
| 0.96 | 2.82E+07 | 2.83E+07 | 1.00 |
| 0.96 | 2.82E+07 | 2.83E+07 | 1.00 |
| 0.92 | 9377951  | 9314963  | 1.01 |
| 0.92 | 9377951  | 9314963  | 1.01 |
| 0.95 | 2.59E+07 | 2.60E+07 | 1.00 |
| 1    | 3162628  | 2478924  | 1.28 |
| 1    | 3162628  | 2478924  | 1.28 |
| 0.71 | 1.65E+07 | 8119936  | 2.03 |
| 0.95 | 4938606  | 5798636  | 0.85 |
| 0.99 | 1345524  | 1217122  | 1.11 |
| 0.91 | 2021964  | 2616817  | 0.77 |
| 0.91 | 2021964  | 2616817  | 0.77 |
| 0.83 | 3718501  | 3190933  | 1.17 |
| 0.9  | 687572   | 678253   | 1.01 |
| 0.99 | 2849934  | 2892261  | 0.99 |
| 1    | 2.30E+07 | 2.28E+07 | 1.01 |
| 0.97 | 1906887  | 1387793  | 1.37 |
| 0.79 | 1.47E+07 | 2.29E+07 | 0.64 |
| 0.99 | 1.58E+07 | 1.55E+07 | 1.02 |
| 0.88 | 1.52E+07 | 1.85E+07 | 0.82 |
| 0.88 | 1.52E+07 | 1.85E+07 | 0.82 |
| 0.97 | 1372995  | 1297053  | 1.06 |
| 0.99 | 3265340  | 3466364  | 0.94 |



|      |          |          |      |
|------|----------|----------|------|
| 0.99 | 2.24E+07 | 2.00E+07 | 1.12 |
| 0.87 | 4.03E+07 | 8.51E+07 | 0.47 |
| 0.91 | 6549813  | 5538474  | 1.18 |
| 0.98 | 718632   | 657508   | 1.09 |
| 1    | 2675807  | 2511042  | 1.07 |
| 0.99 | 3682472  | 3190900  | 1.15 |
| 0.99 | 3682472  | 3190900  | 1.15 |
| 0.99 | 7432892  | 6887543  | 1.08 |
| 0.95 | 1.23E+07 | 9222076  | 1.33 |
| 0.86 | 4323745  | 3423421  | 1.26 |
| 0.98 | 4170524  | 3834187  | 1.09 |
| 0.96 | 3701221  | 3440225  | 1.08 |
| 0.95 | 4456015  | 3892474  | 1.14 |
| 0.95 | 2465414  | 2054601  | 1.20 |
| 0.98 | 2733311  | 2691734  | 1.02 |
| 0.99 | 5.09E+07 | 4.88E+07 | 1.04 |
| 0.99 | 5.09E+07 | 4.88E+07 | 1.04 |
| 0.99 | 1.27E+07 | 1.10E+07 | 1.15 |
| 0.84 | 1805252  | 2524541  | 0.72 |
| 1    | 4288172  | 4027011  | 1.06 |
| 0.92 | 535826   | 844449   | 0.63 |
| 0.98 | 1701355  | 1499488  | 1.13 |
| 0.98 | 1701355  | 1499488  | 1.13 |
| 0.87 | 5903398  | 3799222  | 1.55 |
| 0.87 | 6267608  | 5007860  | 1.25 |
| 1    | 1.82E+07 | 1.45E+07 | 1.26 |
| 1    | 4.32E+07 | 3.27E+07 | 1.32 |
| 0.93 | 997216   | 924582   | 1.08 |
| 0.96 | 2312878  | 1849084  | 1.25 |
| 0.87 | 4534206  | 4745702  | 0.96 |
| 0.96 | 4760156  | 5501667  | 0.87 |
| 0.96 | 4760156  | 5501667  | 0.87 |
| 0.85 | 1.06E+07 | 9108247  | 1.16 |
| 0.85 | 1.06E+07 | 9108247  | 1.16 |
| 0.97 | 1.30E+07 | 1.04E+07 | 1.25 |
| 0.83 | 1.31E+07 | 1.63E+07 | 0.80 |
| 1    | 5.42E+07 | 5.20E+07 | 1.04 |
| 1    | 1.35E+08 | 1.22E+08 | 1.11 |
| 1    | 1.35E+08 | 1.22E+08 | 1.11 |
| 0.99 | 4035305  | 3183556  | 1.27 |
| 0.99 | 4268937  | 3369868  | 1.27 |
| 0.79 | 7080626  | 5687986  | 1.24 |
| 0.99 | 7621900  | 6028969  | 1.26 |
| 0.97 | 6844782  | 6111892  | 1.12 |
| 0.99 | 1.81E+07 | 1.50E+07 | 1.21 |
| 0.99 | 1.81E+07 | 1.50E+07 | 1.21 |
| 1    | 3.53E+07 | 3.06E+07 | 1.15 |
| 1    | 3.53E+07 | 3.06E+07 | 1.15 |
| 0.88 | 5000301  | 4723124  | 1.06 |
| 0.83 | 7439243  | 1.02E+07 | 0.73 |
| 0.83 | 7439243  | 1.02E+07 | 0.73 |

|      |          |          |      |
|------|----------|----------|------|
| 0.23 | 1.73E+07 | 1.01E+07 | 1.71 |
| 0.95 | 1.12E+07 | 1.07E+07 | 1.05 |
| 0.98 | 7.23E+07 | 9.85E+07 | 0.73 |
| 0.6  | 1380767  | 1222748  | 1.13 |
| 0.95 | 7094713  | 6961465  | 1.02 |
| 0.99 | 2485874  | 2274573  | 1.09 |
| 0.98 | 4676102  | 3779173  | 1.24 |
| 0.95 | 1827514  | 1566707  | 1.17 |
| 0.97 | 3679755  | 4611040  | 0.80 |
| 0.96 | 1087867  | 1137608  | 0.96 |
| 0.91 | 6.09E+08 | 7.17E+08 | 0.85 |
| 1    | 2638532  | 2601135  | 1.01 |
| 0.93 | 4572423  | 2711140  | 1.69 |
| 0.96 | 9954690  | 9839309  | 1.01 |
| 0.98 | 1.13E+07 | 1.11E+07 | 1.02 |
| 1    | 1.11E+07 | 1.05E+07 | 1.06 |
| 0.98 | 5191725  | 5080466  | 1.02 |
| 0.98 | 5191725  | 5080466  | 1.02 |
| 1    | 6969835  | 6738386  | 1.03 |
| 0.99 | 8633498  | 1.03E+07 | 0.84 |
| 0.99 | 8633498  | 1.03E+07 | 0.84 |
| 0.99 | 6252329  | 1.11E+07 | 0.56 |
| 0.99 | 6252329  | 1.11E+07 | 0.56 |
| 1    | 1.79E+07 | 1.96E+07 | 0.91 |
| 0.95 | 4609392  | 3941732  | 1.17 |
| 0.98 | 2.28E+07 | 2.47E+07 | 0.92 |
| 0.93 | 351260   | 249710   | 1.41 |
| 0.9  | 858059   | 517959   | 1.66 |
| 0.87 | 5880827  | 6814338  | 0.86 |
| 1    | 1.50E+07 | 1.18E+07 | 1.27 |
| 0.97 | 1818422  | 2527489  | 0.72 |
| 0.98 | 3185812  | 3663289  | 0.87 |
| 0.99 | 5070313  | 4870294  | 1.04 |
| 0.99 | 3960841  | 5138025  | 0.77 |
| 0.94 | 5278180  | 5737305  | 0.92 |
| 0.99 | 4103643  | 4432956  | 0.93 |
| 0.87 | 1417342  | 2942900  | 0.48 |
| 0.93 | 1403650  | 1263653  | 1.11 |
| 0.96 | 3308198  | 2975926  | 1.11 |
| 0.93 | 1.57E+07 | 1.35E+07 | 1.16 |
| 0.68 | 834613   | 473975   | 1.76 |
| 1    | 5775450  | 5864666  | 0.98 |
| 1    | 2.14E+07 | 1.98E+07 | 1.08 |
| 0.99 | 1.93E+07 | 1.45E+07 | 1.33 |
| 0.99 | 4218668  | 4093797  | 1.03 |
| 0.99 | 4218668  | 4093797  | 1.03 |
| 0.98 | 6588909  | 5443731  | 1.21 |
| 0.97 | 790886   | 1187193  | 0.67 |
| 0.98 | 1531519  | 1166142  | 1.31 |
| 0.98 | 1531519  | 1166142  | 1.31 |
| 0.92 | 2827515  | 1226379  | 2.31 |

|      |          |          |      |
|------|----------|----------|------|
| 0.98 | 1535386  | 1571127  | 0.98 |
| 0.99 | 3553774  | 2761096  | 1.29 |
| 0.89 | 275659   | 252837   | 1.09 |
| 0.95 | 388931   | 456106   | 0.85 |
| 0.98 | 833198   | 790624   | 1.05 |
| 1    | 1.04E+07 | 9168662  | 1.13 |
| 1    | 5.83E+07 | 5.31E+07 | 1.10 |
| 0.97 | 1.03E+07 | 1.43E+07 | 0.72 |
| 0.97 | 1.03E+07 | 1.43E+07 | 0.72 |
| 0.97 | 1.03E+07 | 1.43E+07 | 0.72 |
| 0.88 | 5207594  | 8086751  | 0.64 |
| 0.99 | 4988072  | 4651298  | 1.07 |
| 0.99 | 1.07E+07 | 9833801  | 1.09 |
| 0.99 | 1.07E+07 | 9833801  | 1.09 |
| 0.98 | 1.59E+07 | 1.40E+07 | 1.14 |
| 0.98 | 1.59E+07 | 1.40E+07 | 1.14 |
| 1    | 1.45E+07 | 1.42E+07 | 1.02 |
| 1    | 1.45E+07 | 1.42E+07 | 1.02 |
| 0.99 | 1.50E+07 | 1.55E+07 | 0.97 |
| 1    | 4.75E+07 | 4.13E+07 | 1.15 |
| 0.99 | 6.58E+07 | 5.96E+07 | 1.10 |
| 1    | 1.17E+08 | 1.13E+08 | 1.04 |
| 1    | 1.17E+09 | 1.07E+09 | 1.09 |
| 1    | 2.05E+09 | 1.87E+09 | 1.10 |
| 0.97 | 606766   | 429939   | 1.41 |
| 0.95 | 1197676  | 1071938  | 1.12 |
| 0.98 | 8966317  | 8635913  | 1.04 |
| 1    | 1.57E+07 | 1.45E+07 | 1.08 |
| 1    | 3.67E+08 | 3.42E+08 | 1.07 |
| 0.99 | 2.20E+07 | 1.92E+07 | 1.15 |
| 1    | 5.25E+08 | 4.52E+08 | 1.16 |
| 0.97 | 695430   | 565524   | 1.23 |
| 0.99 | 3850185  | 3137885  | 1.23 |
| 1    | 8814811  | 1.37E+07 | 0.64 |
| 0.98 | 1.39E+07 | 1.30E+07 | 1.07 |
| 0.98 | 1.39E+07 | 1.30E+07 | 1.07 |
| 0.97 | 4191878  | 4228450  | 0.99 |
| 1    | 3308116  | 3085076  | 1.07 |
| 0.88 | 1.06E+07 | 6629876  | 1.60 |
| 0.98 | 9870418  | 7849683  | 1.26 |
| 0.98 | 9870418  | 7849683  | 1.26 |
| 0.99 | 2299096  | 1899154  | 1.21 |
| 0.77 | 1633596  | 2526519  | 0.65 |
| 0.99 | 5195387  | 4105659  | 1.27 |
| 0.97 | 5050141  | 4217917  | 1.20 |
| 0.94 | 4627866  | 2.31E+07 | 0.20 |
| 0.94 | 4627866  | 2.31E+07 | 0.20 |
| 0.94 | 4627866  | 2.31E+07 | 0.20 |
| 1    | 3.32E+07 | 2.78E+07 | 1.19 |
| 1    | 4629841  | 4523721  | 1.02 |
| 1    | 4629841  | 4523721  | 1.02 |

|      |          |          |      |
|------|----------|----------|------|
| 0.99 | 3716058  | 4092052  | 0.91 |
| 0.97 | 6691036  | 5479702  | 1.22 |
| 0.99 | 1.38E+07 | 1.33E+07 | 1.04 |
| 1    | 3.32E+07 | 4.96E+07 | 0.67 |
| 1    | 1.44E+08 | 1.31E+08 | 1.10 |
| 0.82 | 1884496  | 1284526  | 1.47 |
| 0.98 | 4134995  | 3645090  | 1.13 |
| 0.98 | 7631067  | 6359088  | 1.20 |
| 0.99 | 7888977  | 6918239  | 1.14 |
| 0.99 | 7888977  | 6918239  | 1.14 |
| 0.98 | 7057220  | 6937567  | 1.02 |
| 0.98 | 4.07E+07 | 3.77E+07 | 1.08 |
| 0.98 | 4.07E+07 | 3.77E+07 | 1.08 |
| 1    | 5.58E+07 | 5.07E+07 | 1.10 |
| 0.99 | 7.20E+07 | 5.85E+07 | 1.23 |
| 0.99 | 1847484  | 1600032  | 1.15 |
| 0.99 | 1544173  | 1625402  | 0.95 |
| 0.92 | 7640826  | 7199250  | 1.06 |
| 0.92 | 7640826  | 7199250  | 1.06 |
| 0.99 | 1.09E+07 | 1.00E+07 | 1.09 |
| 0.97 | 579104   | 482782   | 1.20 |
| 0.99 | 4479615  | 4144362  | 1.08 |
| 0.98 | 176573   | 346976   | 0.51 |
| 0.91 | 1400023  | 1389918  | 1.01 |
| 0.97 | 7068433  | 6782063  | 1.04 |
| 0.99 | 850304   | 823075   | 1.03 |
| 0.97 | 1936985  | 1287771  | 1.50 |
| 0.97 | 1936985  | 1287771  | 1.50 |
| 0.87 | 4449476  | 3131771  | 1.42 |
| 0.99 | 5337931  | 5126925  | 1.04 |
| 0.99 | 7077716  | 6540299  | 1.08 |
| 0.99 | 7077716  | 6540299  | 1.08 |
| 0.91 | 1.16E+07 | 1.06E+07 | 1.09 |
| 0.95 | 3.77E+07 | 3.35E+07 | 1.13 |
| 0.95 | 3.77E+07 | 3.35E+07 | 1.13 |
| 0.96 | 2713990  | 2639069  | 1.03 |
| 0.94 | 2799960  | 3184551  | 0.88 |
| 0.97 | 3084212  | 2740467  | 1.13 |
| 0.99 | 4394033  | 3856682  | 1.14 |
| 0.99 | 2.73E+07 | 2.13E+07 | 1.28 |
| 1    | 4.38E+07 | 4.11E+07 | 1.07 |
| 0.97 | 1245076  | 1240606  | 1.00 |
| 0.9  | 7272195  | 5224726  | 1.39 |
| 0.79 | 8231535  | 1.22E+07 | 0.67 |
| 0.97 | 2.71E+07 | 2.11E+07 | 1.28 |
| 0.97 | 2.71E+07 | 2.11E+07 | 1.28 |
| 0.98 | 2653425  | 2931567  | 0.91 |
| 0.99 | 4161492  | 3720404  | 1.12 |
| 0.99 | 9586070  | 8170020  | 1.17 |
| 0.95 | 860023   | 822696   | 1.05 |
| 0.85 | 2098980  | 1917388  | 1.09 |

|      |          |          |      |
|------|----------|----------|------|
| 0.99 | 2020219  | 2271518  | 0.89 |
| 0.99 | 2020219  | 2271518  | 0.89 |
| 0.49 | 4226698  | 1341043  | 3.15 |
| 0.96 | 1.02E+07 | 8129263  | 1.25 |
| 0.99 | 6314819  | 5404735  | 1.17 |
| 1    | 2.67E+07 | 2.24E+07 | 1.19 |
| 0.99 | 2746985  | 3106439  | 0.88 |
| 0.73 | 1.73E+07 | 1.20E+07 | 1.44 |
| 0.93 | 3705886  | 3497561  | 1.06 |
| 0.99 | 6084465  | 5627795  | 1.08 |
| 0.99 | 2.44E+07 | 2.05E+07 | 1.19 |
| 0.96 | 3755637  | 3406989  | 1.10 |
| 0.96 | 3755637  | 3406989  | 1.10 |
| 1    | 1.99E+07 | 1.77E+07 | 1.12 |
| 0.98 | 1284036  | 1149678  | 1.12 |
| 0.98 | 5305310  | 5308972  | 1.00 |
| 0.95 | 6594339  | 5733143  | 1.15 |
| 0.75 | 5025356  | 2662268  | 1.89 |
| 0.95 | 784645   | 790887   | 0.99 |
| 0.96 | 1437350  | 1191670  | 1.21 |
| 0.93 | 8100840  | 4512703  | 1.80 |
| 0.99 | 8004648  | 8535247  | 0.94 |
| 0.96 | 1.38E+07 | 1.10E+07 | 1.25 |
| 0.96 | 1.71E+07 | 1.75E+07 | 0.98 |
| 0.99 | 2.55E+07 | 2.06E+07 | 1.24 |
| 0.97 | 2.35E+07 | 2.10E+07 | 1.12 |
| 0.99 | 2173689  | 2078837  | 1.05 |
| 0.99 | 2173689  | 2078837  | 1.05 |
| 0.98 | 2982233  | 2862279  | 1.04 |
| 0.95 | 4972753  | 4527560  | 1.10 |
| 0.99 | 1.29E+07 | 1.20E+07 | 1.08 |
| 1    | 7.54E+07 | 6.66E+07 | 1.13 |
| 1    | 1.04E+08 | 9.66E+07 | 1.08 |
| 1    | 7866092  | 6975760  | 1.13 |
| 0.88 | 774047   | 812611   | 0.95 |
| 0.92 | 3137331  | 3418637  | 0.92 |
| 0.98 | 6282720  | 6220682  | 1.01 |
| 0.96 | 9596244  | 9881892  | 0.97 |
| 0.99 | 1.46E+07 | 1.33E+07 | 1.10 |
| 0.95 | 1.44E+07 | 1.40E+07 | 1.03 |
| 0.97 | 1.55E+07 | 1.49E+07 | 1.04 |
| 0.99 | 2.10E+07 | 2.08E+07 | 1.01 |
| 0.98 | 2.38E+07 | 2.22E+07 | 1.07 |
| 1    | 2.97E+07 | 2.68E+07 | 1.11 |
| 0.99 | 4.21E+07 | 4.13E+07 | 1.02 |
| 1    | 4.87E+07 | 4.71E+07 | 1.03 |
| 1    | 4.87E+07 | 4.71E+07 | 1.03 |
| 0.99 | 7.10E+07 | 6.63E+07 | 1.07 |
| 1    | 1.05E+08 | 1.04E+08 | 1.01 |
| 0.99 | 1.86E+08 | 1.83E+08 | 1.02 |
| 0.96 | 533266   | 413028   | 1.29 |

|      |          |          |      |
|------|----------|----------|------|
| 0.96 | 1081005  | 1019833  | 1.06 |
| 0.98 | 1700757  | 1745182  | 0.97 |
| 0.99 | 7716444  | 7048848  | 1.09 |
| 0.9  | 5736328  | 8232962  | 0.70 |
| 1    | 1.07E+07 | 9719316  | 1.10 |
| 1    | 1.07E+07 | 9719316  | 1.10 |
| 0.99 | 1.66E+07 | 1.69E+07 | 0.98 |
| 0.91 | 1256256  | 852312   | 1.47 |
| 0.97 | 2933227  | 2379950  | 1.23 |
| 0.97 | 2933227  | 2379950  | 1.23 |
| 0.91 | 4920410  | 5626912  | 0.87 |
| 0.91 | 4920410  | 5626912  | 0.87 |
| 0.97 | 1.11E+07 | 1.09E+07 | 1.02 |
| 0.99 | 2.00E+07 | 1.95E+07 | 1.03 |
| 1    | 4.30E+07 | 4.16E+07 | 1.03 |
| 1    | 4.30E+07 | 4.16E+07 | 1.03 |
| 1    | 1.30E+08 | 1.14E+08 | 1.14 |
| 1    | 1.30E+08 | 1.14E+08 | 1.14 |
| 0.98 | 1208578  | 1452166  | 0.83 |
| 0.78 | 1790641  | 1739712  | 1.03 |
| 0.93 | 2401460  | 2539577  | 0.95 |
| 0.98 | 3805757  | 3147597  | 1.21 |
| 0.99 | 4220013  | 3607848  | 1.17 |
| 0.99 | 4220013  | 3607848  | 1.17 |
| 0.97 | 9011411  | 8475488  | 1.06 |
| 0.97 | 9077357  | 8839116  | 1.03 |
| 0.93 | 9897276  | 9161471  | 1.08 |
| 0.86 | 1.40E+07 | 1.26E+07 | 1.11 |
| 0.99 | 2.11E+07 | 2.11E+07 | 1.00 |
| 0.94 | 3.79E+07 | 3.71E+07 | 1.02 |
| 1    | 1.06E+08 | 9.57E+07 | 1.11 |
| 0.99 | 1931808  | 1898239  | 1.02 |
| 0.98 | 888901   | 680090   | 1.31 |
| 0.99 | 1.81E+07 | 1.73E+07 | 1.05 |
| 0.99 | 2.20E+07 | 2.55E+07 | 0.86 |
| 0.99 | 3.00E+07 | 3.58E+07 | 0.84 |
| 0.99 | 3.00E+07 | 3.58E+07 | 0.84 |
| 0.97 | 2933830  | 2928658  | 1.00 |
| 0.99 | 1.05E+07 | 8805470  | 1.19 |
| 0.99 | 1.05E+07 | 8805470  | 1.19 |
| 0.91 | 1162257  | 1107691  | 1.05 |
| 0.98 | 854817   | 1297093  | 0.66 |
| 0.99 | 1310400  | 1273494  | 1.03 |
| 0.98 | 1847531  | 7.93E+07 | 0.02 |
| 0.98 | 2101406  | 2035545  | 1.03 |
| 0.99 | 4548548  | 3983140  | 1.14 |
| 1    | 1.35E+07 | 1.14E+07 | 1.18 |
| 0.99 | 3239298  | 2906745  | 1.11 |
| 0.89 | 1.89E+07 | 1.41E+07 | 1.34 |
| 0.89 | 1.89E+07 | 1.41E+07 | 1.34 |
| 1    | 6.57E+07 | 5.62E+07 | 1.17 |

|      |          |          |      |
|------|----------|----------|------|
| 1    | 1.64E+08 | 1.60E+08 | 1.03 |
| 0.87 | 526528   | 411513   | 1.28 |
| 0.95 | 1806448  | 1733800  | 1.04 |
| 0.95 | 1806448  | 1733800  | 1.04 |
| 1    | 6563822  | 5123744  | 1.28 |
| 1    | 1.11E+07 | 1.04E+07 | 1.07 |
| 1    | 1.11E+07 | 1.04E+07 | 1.07 |
| 1    | 1.45E+07 | 1.11E+07 | 1.31 |
| 1    | 1.11E+08 | 1.11E+08 | 1.00 |
| 0.98 | 1.97E+08 | 1.89E+08 | 1.04 |
| 0.98 | 1.97E+08 | 1.89E+08 | 1.04 |
| 0.87 | 2078482  | 1310631  | 1.59 |
| 0.99 | 6538805  | 3123568  | 2.09 |
| 0.53 | 426912   | 4320894  | 0.10 |
| 1    | 5268285  | 4542162  | 1.16 |
| 1    | 1.26E+07 | 8868399  | 1.42 |
| 0.98 | 3187501  | 2576814  | 1.24 |
| 0.85 | 2243860  | 1421763  | 1.58 |
| 0.88 | 2098243  | 1895928  | 1.11 |
| 0.88 | 4731766  | 3484412  | 1.36 |
| 0.88 | 4731766  | 3484412  | 1.36 |
| 0.88 | 4731766  | 3484412  | 1.36 |
| 0.96 | 7904723  | 7801477  | 1.01 |
| 0.96 | 7904723  | 7801477  | 1.01 |
| 0.98 | 907737   | 946545   | 0.96 |
| 0.94 | 3102315  | 2818937  | 1.10 |
| 0.94 | 3102315  | 2818937  | 1.10 |
| 0.95 | 2790311  | 2330024  | 1.20 |
| 0.99 | 1.98E+07 | 1.73E+07 | 1.14 |
| 1    | 4.36E+07 | 4.05E+07 | 1.08 |
| 0.95 | 1794780  | 1530603  | 1.17 |
| 0.99 | 4.84E+07 | 3.91E+07 | 1.24 |
| 0.97 | 4745903  | 4763124  | 1.00 |
| 1    | 1.24E+07 | 1.13E+07 | 1.10 |
| 1    | 6.24E+07 | 5.85E+07 | 1.07 |
| 0.99 | 9835542  | 9999676  | 0.98 |
| 0.99 | 9835542  | 9999676  | 0.98 |
| 0.99 | 8163242  | 7112833  | 1.15 |
| 0.91 | 5781236  | 7835694  | 0.74 |
| 0.9  | 666906   | 1542766  | 0.43 |
| 1    | 2.71E+07 | 2.51E+07 | 1.08 |
| 0.92 | 4287083  | 3687115  | 1.16 |
| 0.87 | 4141936  | 5154496  | 0.80 |
| 0.76 | 3727385  | 4626810  | 0.81 |
| 0.74 | 4780402  | 5056240  | 0.95 |
| 0.98 | 3.80E+07 | 3.44E+07 | 1.10 |
| 0.93 | 2.15E+07 | 3.56E+07 | 0.60 |
| 0.99 | 4.18E+07 | 4.03E+07 | 1.04 |
| 0.97 | 4.40E+07 | 4.18E+07 | 1.05 |
| 0.97 | 4.40E+07 | 4.18E+07 | 1.05 |
| 0.99 | 4.36E+07 | 4.25E+07 | 1.03 |

|      |          |          |      |
|------|----------|----------|------|
| 0.93 | 2160269  | 2131251  | 1.01 |
| 0.98 | 3296902  | 2416496  | 1.36 |
| 0.98 | 4308511  | 4305472  | 1.00 |
| 0.98 | 4308511  | 4305472  | 1.00 |
| 0.99 | 8934679  | 7481968  | 1.19 |
| 0.99 | 5072073  | 4941978  | 1.03 |
| 0.95 | 2954738  | 2742116  | 1.08 |
| 0.99 | 4852727  | 4950901  | 0.98 |
| 0.82 | 2003844  | 1535974  | 1.30 |
| 0.91 | 2604817  | 2496256  | 1.04 |
| 0.9  | 5939380  | 4962535  | 1.20 |
| 0.95 | 1.27E+07 | 1.24E+07 | 1.02 |
| 0.9  | 2.38E+07 | 1.62E+07 | 1.47 |
| 0.9  | 1648139  | 1686735  | 0.98 |
| 0.98 | 5170556  | 5910975  | 0.87 |
| 0.91 | 2554586  | 1621813  | 1.58 |
| 0.99 | 2068566  | 2138782  | 0.97 |
| 0.98 | 3274561  | 3133218  | 1.05 |
| 1    | 3810711  | 3463666  | 1.10 |
| 0.99 | 3226768  | 3480326  | 0.93 |
| 0.98 | 1.53E+07 | 1.38E+07 | 1.11 |
| 0.98 | 1.53E+07 | 1.38E+07 | 1.11 |
| 0.94 | 1156122  | 1025001  | 1.13 |
| 0.95 | 8295852  | 6911693  | 1.20 |
| 0.95 | 8295852  | 6911693  | 1.20 |
| 0.92 | 1810200  | 1427638  | 1.27 |
| 0.92 | 2179702  | 1877917  | 1.16 |
| 0.99 | 2214672  | 1933931  | 1.15 |
| 0.63 | 2709361  | 2475751  | 1.09 |
| 0.99 | 8363469  | 7776761  | 1.08 |
| 1    | 2.08E+07 | 2.00E+07 | 1.04 |
| 0.98 | 4.00E+07 | 3.59E+07 | 1.11 |
| 0.85 | 7.69E+07 | 2.48E+07 | 3.10 |
| 0.89 | 348553   | 273098   | 1.28 |
| 0.99 | 2127165  | 1750120  | 1.22 |
| 0.97 | 4792673  | 4477319  | 1.07 |
| 0.87 | 5548601  | 5626819  | 0.99 |
| 1    | 6252181  | 5822757  | 1.07 |
| 0.98 | 5242403  | 6755639  | 0.78 |
| 0.89 | 7893711  | 1.15E+07 | 0.69 |
| 1    | 1.35E+07 | 1.43E+07 | 0.94 |
| 1    | 1.35E+07 | 1.43E+07 | 0.94 |
| 0.99 | 1.93E+07 | 1.90E+07 | 1.02 |
| 1    | 3.72E+07 | 4.04E+07 | 0.92 |
| 0.96 | 3252312  | 3561784  | 0.91 |
| 0.92 | 3857149  | 3697288  | 1.04 |
| 0.84 | 1.01E+07 | 9959060  | 1.01 |
| 0.86 | 3480305  | 4256967  | 0.82 |
| 0.97 | 4973836  | 4399443  | 1.13 |
| 0.98 | 1.75E+07 | 1.45E+07 | 1.21 |
| 0.98 | 1.75E+07 | 1.45E+07 | 1.21 |



|      |          |          |      |
|------|----------|----------|------|
| 0.98 | 1.75E+07 | 1.45E+07 | 1.21 |
| 0.93 | 2530100  | 2186284  | 1.16 |
| 0.99 | 1.31E+07 | 1.10E+07 | 1.19 |
| 0.99 | 1.31E+07 | 1.10E+07 | 1.19 |
| 0.98 | 2633866  | 1540381  | 1.71 |
| 0.99 | 9076479  | 7161787  | 1.27 |
| 0.99 | 3.26E+07 | 2.80E+07 | 1.16 |
| 0.98 | 5821997  | 5594701  | 1.04 |
| 1    | 6908886  | 6610053  | 1.05 |
| 1    | 6908886  | 6610053  | 1.05 |
| 1    | 9921755  | 7879520  | 1.26 |
| 1    | 9921755  | 7879520  | 1.26 |
| 1    | 3.32E+07 | 2.93E+07 | 1.13 |
| 1    | 3.32E+07 | 2.93E+07 | 1.13 |
| 1    | 2.58E+07 | 2.26E+07 | 1.14 |
| 1    | 2.58E+07 | 2.26E+07 | 1.14 |
| 1    | 2.58E+07 | 2.26E+07 | 1.14 |
| 1    | 2.58E+07 | 2.26E+07 | 1.14 |
| 1    | 2.58E+07 | 2.26E+07 | 1.14 |
| 0.9  | 1.53E+07 | 1.49E+07 | 1.03 |
| 0.94 | 2.92E+07 | 1.68E+07 | 1.74 |
| 0.98 | 2586251  | 2057942  | 1.26 |
| 0.99 | 4378629  | 3577129  | 1.22 |
| 0.99 | 4250653  | 3859420  | 1.10 |
| 0.97 | 6626464  | 4985746  | 1.33 |
| 1    | 1.34E+07 | 1.16E+07 | 1.16 |
| 0.98 | 2.38E+07 | 1.97E+07 | 1.21 |
| 0.99 | 1936197  | 1968462  | 0.98 |
| 0.99 | 3709954  | 3704693  | 1.00 |
| 1    | 5987438  | 5854273  | 1.02 |
| 0.97 | 1.18E+07 | 9172135  | 1.29 |
| 0.95 | 1.18E+07 | 9770845  | 1.21 |
| 0.99 | 1.46E+07 | 1.27E+07 | 1.15 |
| 0.85 | 547673   | 505767   | 1.08 |
| 0.88 | 819977   | 768626   | 1.07 |
| 0.97 | 1134607  | 1080726  | 1.05 |
| 0.98 | 2378249  | 2234188  | 1.06 |
| 0.96 | 3134650  | 2778865  | 1.13 |
| 0.96 | 3134650  | 2778865  | 1.13 |
| 1    | 6906425  | 6598609  | 1.05 |
| 0.99 | 1.70E+07 | 1.79E+07 | 0.95 |
| 0.99 | 2.84E+07 | 2.77E+07 | 1.03 |
| 0.99 | 1370184  | 1353859  | 1.01 |
| 0.93 | 9807880  | 9544386  | 1.03 |
| 0.67 | 6901422  | 1.04E+07 | 0.66 |
| 0.89 | 6453487  | 7834048  | 0.82 |
| 0.8  | 1244185  | 705347   | 1.76 |
| 0.93 | 4629220  | 1857654  | 2.49 |
| 0.92 | 1553372  | 1566284  | 0.99 |
| 0.99 | 7637512  | 7112130  | 1.07 |
| 0.97 | 1.22E+07 | 1.05E+07 | 1.16 |

|      |          |          |      |
|------|----------|----------|------|
| 0.99 | 1.10E+07 | 1.13E+07 | 0.97 |
| 0.93 | 2.44E+07 | 2.20E+07 | 1.11 |
| 1    | 2.26E+07 | 2.23E+07 | 1.01 |
| 0.95 | 3.11E+07 | 2.81E+07 | 1.11 |
| 1    | 6.64E+07 | 6.43E+07 | 1.03 |
| 0.9  | 2296311  | 1837324  | 1.25 |
| 0.9  | 1497321  | 1122580  | 1.33 |
| 0.91 | 1506018  | 1819119  | 0.83 |
| 0.95 | 4071426  | 1925421  | 2.11 |
| 0.95 | 4071426  | 1925421  | 2.11 |
| 0.81 | 3392482  | 2997231  | 1.13 |
| 0.98 | 4391248  | 4864429  | 0.90 |
| 0.84 | 9261667  | 8736169  | 1.06 |
| 0.94 | 9.05E+07 | 8.05E+07 | 1.12 |
| 0.95 | 8555405  | 6869618  | 1.25 |
| 0.97 | 2000050  | 1567200  | 1.28 |
| 0.97 | 1.68E+07 | 1.67E+07 | 1.01 |
| 0.97 | 2.06E+07 | 2.15E+07 | 0.96 |
| 1    | 6.08E+07 | 5.68E+07 | 1.07 |
| 1    | 4.04E+07 | 3.87E+07 | 1.04 |
| 0.89 | 1400955  | 1214208  | 1.15 |
| 0.98 | 3583338  | 3263512  | 1.10 |
| 0.98 | 5903982  | 7873178  | 0.75 |
| 0.99 | 735595   | 608818   | 1.21 |
| 0.97 | 2858709  | 2666185  | 1.07 |
| 0.98 | 3194379  | 2792797  | 1.14 |
| 0.97 | 3275309  | 3351128  | 0.98 |
| 0.99 | 1.23E+07 | 1.17E+07 | 1.05 |
| 1    | 7985101  | 6224156  | 1.28 |
| 0.94 | 5513396  | 4232863  | 1.30 |
| 0.94 | 1.01E+07 | 9990715  | 1.01 |
| 1    | 1.42E+07 | 1.29E+07 | 1.10 |
| 1    | 1.42E+07 | 1.29E+07 | 1.10 |
| 0.96 | 4497067  | 3627569  | 1.24 |
| 1    | 6.42E+07 | 6.35E+07 | 1.01 |
| 0.94 | 1044987  | 944747   | 1.11 |
| 0.94 | 1512955  | 1369699  | 1.10 |
| 0.93 | 3137351  | 2003849  | 1.57 |
| 0.94 | 3378647  | 3270053  | 1.03 |
| 0.98 | 5064608  | 4593543  | 1.10 |
| 0.98 | 5064608  | 4593543  | 1.10 |
| 0.99 | 6857710  | 6250931  | 1.10 |
| 0.99 | 6857710  | 6250931  | 1.10 |
| 0.94 | 1.25E+07 | 9420668  | 1.33 |
| 1    | 1.17E+07 | 1.21E+07 | 0.97 |
| 1    | 1.39E+07 | 1.33E+07 | 1.05 |
| 1    | 2.75E+07 | 2.51E+07 | 1.10 |
| 1    | 2.75E+07 | 2.51E+07 | 1.10 |
| 1    | 2.67E+07 | 2.62E+07 | 1.02 |
| 1    | 5.71E+07 | 5.50E+07 | 1.04 |
| 1    | 5.71E+07 | 5.50E+07 | 1.04 |

|      |          |          |      |
|------|----------|----------|------|
| 0.92 | 1695970  | 1452660  | 1.17 |
| 0.92 | 1695970  | 1452660  | 1.17 |
| 0.91 | 4002742  | 3296032  | 1.21 |
| 0.88 | 5160017  | 4485845  | 1.15 |
| 0.96 | 1.63E+07 | 1.93E+07 | 0.84 |
| 0.96 | 1.63E+07 | 1.93E+07 | 0.84 |
| 0.99 | 3.51E+07 | 3.29E+07 | 1.07 |
| 0.99 | 1408491  | 1386934  | 1.02 |
| 0.99 | 8487620  | 7142933  | 1.19 |
| 0.28 | 3746542  | 1109265  | 3.38 |
| 0.89 | 1080375  | 1236962  | 0.87 |
| 0.96 | 1541418  | 1254514  | 1.23 |
| 0.76 | 2025815  | 1399052  | 1.45 |
| 0.99 | 1636257  | 1453910  | 1.13 |
| 0.92 | 2058830  | 1660825  | 1.24 |
| 0.96 | 2448011  | 2054709  | 1.19 |
| 0.99 | 2179822  | 2097000  | 1.04 |
| 0.96 | 2138140  | 2261757  | 0.95 |
| 0.99 | 2251776  | 2414944  | 0.93 |
| 0.97 | 3813545  | 3204895  | 1.19 |
| 0.98 | 3599611  | 3327361  | 1.08 |
| 0.91 | 7706606  | 5901000  | 1.31 |
| 0.82 | 1.06E+07 | 1.09E+07 | 0.97 |
| 1    | 1.81E+07 | 1.76E+07 | 1.03 |
| 0.97 | 1.72E+07 | 1.99E+07 | 0.86 |
| 0.97 | 1.72E+07 | 1.99E+07 | 0.86 |
| 0.99 | 5.46E+07 | 5.19E+07 | 1.05 |
| 0.92 | 1.05E+07 | 1.15E+07 | 0.91 |
| 1    | 2.94E+07 | 2.67E+07 | 1.10 |
| 0.98 | 1.18E+07 | 1.20E+07 | 0.98 |
| 1    | 5450438  | 5021646  | 1.09 |
| 0.99 | 1.24E+07 | 1.11E+07 | 1.12 |
| 0.88 | 1040920  | 1027075  | 1.01 |
| 0.98 | 4074346  | 3607182  | 1.13 |
| 0.99 | 7452856  | 7008380  | 1.06 |
| 1    | 2.98E+08 | 2.61E+08 | 1.14 |
| 1    | 2.98E+08 | 2.61E+08 | 1.14 |
| 0.76 | 1688162  | 1446844  | 1.17 |
| 0.97 | 1958484  | 1926587  | 1.02 |
| 0.97 | 1958484  | 1926587  | 1.02 |
| 0.97 | 2632909  | 2088370  | 1.26 |
| 0.9  | 2460700  | 2193093  | 1.12 |
| 0.9  | 2460700  | 2193093  | 1.12 |
| 0.99 | 1.47E+07 | 1.31E+07 | 1.12 |
| 1    | 6976138  | 6075623  | 1.15 |
| 0.99 | 2.19E+07 | 1.94E+07 | 1.13 |
| 1    | 8.03E+07 | 7.23E+07 | 1.11 |
| 1    | 8.03E+07 | 7.23E+07 | 1.11 |
| 0.97 | 4377059  | 3472058  | 1.26 |
| 0.91 | 3684279  | 3517321  | 1.05 |
| 0.91 | 1.48E+07 | 1.28E+07 | 1.16 |

|      |          |          |      |
|------|----------|----------|------|
| 0.98 | 6016493  | 4547743  | 1.32 |
| 0.98 | 6016493  | 4547743  | 1.32 |
| 0.96 | 6117999  | 6199575  | 0.99 |
| 0.93 | 1218225  | 1242827  | 0.98 |
| 0.99 | 2165795  | 2246132  | 0.96 |
| 0.98 | 2375030  | 2292080  | 1.04 |
| 0.98 | 1658182  | 1501228  | 1.10 |
| 0.93 | 1851101  | 2340436  | 0.79 |
| 0.99 | 3041172  | 2973205  | 1.02 |
| 0.96 | 3838934  | 3174340  | 1.21 |
| 0.97 | 6759659  | 5274947  | 1.28 |
| 0.99 | 1.00E+07 | 8474389  | 1.18 |
| 0.99 | 1.29E+07 | 1.18E+07 | 1.09 |
| 0.96 | 1.61E+07 | 1.50E+07 | 1.07 |
| 0.93 | 1.43E+07 | 1.56E+07 | 0.92 |
| 0.91 | 2.40E+07 | 2.11E+07 | 1.14 |
| 0.99 | 4.27E+07 | 4.33E+07 | 0.99 |
| 0.99 | 5.39E+07 | 4.90E+07 | 1.10 |
| 1    | 8.25E+07 | 7.04E+07 | 1.17 |
| 1    | 8967000  | 7824077  | 1.15 |
| 0.97 | 1.18E+07 | 1.10E+07 | 1.07 |
| 0.97 | 1.73E+07 | 1.60E+07 | 1.08 |
| 0.94 | 2788324  | 2979561  | 0.94 |
| 0.35 | 1848309  | 5661845  | 0.33 |
| 0.99 | 1.01E+07 | 9169862  | 1.10 |
| 0.96 | 4744271  | 3869079  | 1.23 |
| 0.98 | 6819753  | 6464200  | 1.06 |
| 0.98 | 1.26E+07 | 1.16E+07 | 1.09 |
| 0.99 | 1.37E+07 | 1.21E+07 | 1.13 |
| 0.99 | 5619321  | 4879112  | 1.15 |
| 0.94 | 5879056  | 4900675  | 1.20 |
| 0.98 | 7865062  | 7733196  | 1.02 |
| 0.97 | 1.36E+07 | 1.57E+07 | 0.87 |
| 0.94 | 1228287  | 865826   | 1.42 |
| 0.98 | 2076787  | 1269833  | 1.64 |
| 1    | 2.70E+07 | 2.04E+07 | 1.32 |
| 0.97 | 1289597  | 1063148  | 1.21 |
| 0.83 | 3802840  | 2723163  | 1.40 |
| 0.96 | 964514   | 954727   | 1.01 |
| 1    | 2654413  | 2634354  | 1.01 |
| 0.96 | 4573899  | 3813023  | 1.20 |
| 0.9  | 6060084  | 6338731  | 0.96 |
| 0.98 | 9006795  | 7797155  | 1.16 |
| 0.96 | 8007234  | 6755681  | 1.19 |
| 0.84 | 1.81E+07 | 1.46E+07 | 1.24 |
| 0.95 | 1603482  | 2960389  | 0.54 |
| 0.96 | 4018979  | 4949480  | 0.81 |
| 0.97 | 1457611  | 1215153  | 1.20 |
| 0.98 | 1599854  | 1543418  | 1.04 |
| 0.99 | 2761929  | 2658215  | 1.04 |
| 0.99 | 2761929  | 2658215  | 1.04 |

|      |          |          |      |
|------|----------|----------|------|
| 0.99 | 5694049  | 5667321  | 1.00 |
| 1    | 4.92E+07 | 4.52E+07 | 1.09 |
| 0.97 | 1.52E+07 | 1.06E+07 | 1.43 |
| 0.99 | 7691145  | 6614205  | 1.16 |
| 0.99 | 7691145  | 6614205  | 1.16 |
| 0.82 | 1.47E+07 | 2808662  | 5.23 |
| 0.99 | 2.12E+07 | 2.27E+07 | 0.93 |
| 0.8  | 2564645  | 3209548  | 0.80 |
| 0.8  | 2564645  | 3209548  | 0.80 |
| 0.86 | 1501242  | 1294891  | 1.16 |
| 0.96 | 3514141  | 3357187  | 1.05 |
| 0.96 | 3514141  | 3357187  | 1.05 |
| 0.96 | 3514141  | 3357187  | 1.05 |
| 0.99 | 1173433  | 982195   | 1.19 |
| 0.63 | 9632054  | 4718354  | 2.04 |
| 0.99 | 1.23E+07 | 1.06E+07 | 1.16 |
| 0.96 | 1085364  | 991738   | 1.09 |
| 0.98 | 2782194  | 2423995  | 1.15 |
| 0.95 | 3400360  | 3349656  | 1.02 |
| 0.95 | 3400360  | 3349656  | 1.02 |
| 1    | 6971238  | 6606886  | 1.06 |
| 0.95 | 1824808  | 1658036  | 1.10 |
| 0.98 | 1955768  | 1835364  | 1.07 |
| 0.97 | 2236727  | 2174140  | 1.03 |
| 0.97 | 2236727  | 2174140  | 1.03 |
| 0.97 | 5048969  | 5097140  | 0.99 |
| 0.97 | 8447360  | 8974021  | 0.94 |
| 0.98 | 1.34E+07 | 1.13E+07 | 1.19 |
| 0.88 | 5966727  | 5697707  | 1.05 |
| 0.84 | 9207743  | 6664648  | 1.38 |
| 0.99 | 1.51E+07 | 1.32E+07 | 1.14 |
| 0.99 | 1.51E+07 | 1.32E+07 | 1.14 |
| 0.94 | 6469911  | 4514889  | 1.43 |
| 0.99 | 1.12E+07 | 8759831  | 1.28 |
| 0.95 | 1.73E+07 | 1.48E+07 | 1.17 |
| 0.95 | 1.73E+07 | 1.48E+07 | 1.17 |
| 0.98 | 3.20E+07 | 2.48E+07 | 1.29 |
| 0.99 | 3.12E+07 | 2.97E+07 | 1.05 |
| 0.99 | 3.12E+07 | 2.97E+07 | 1.05 |
| 1    | 4.00E+07 | 3.37E+07 | 1.19 |
| 0.96 | 1.54E+07 | 1.45E+07 | 1.06 |
| 0.91 | 1.19E+07 | 2484126  | 4.79 |
| 0.72 | 2.20E+08 | 2.88E+07 | 7.64 |
| 0.97 | 1.15E+07 | 1.51E+07 | 0.76 |
| 0.95 | 3564239  | 3485107  | 1.02 |
| 0.95 | 3564239  | 3485107  | 1.02 |
| 0.99 | 3.12E+07 | 2.59E+07 | 1.20 |
| 0.98 | 1.13E+07 | 1.09E+07 | 1.04 |
| 0.99 | 1.16E+07 | 1.27E+07 | 0.91 |
| 0.99 | 1.16E+07 | 1.27E+07 | 0.91 |
| 0.98 | 2.02E+07 | 1.96E+07 | 1.03 |

|      |          |          |      |
|------|----------|----------|------|
| 0.92 | 2071659  | 1573290  | 1.32 |
| 0.98 | 888566   | 624786   | 1.42 |
| 0.95 | 2581143  | 2314332  | 1.12 |
| 0.95 | 2836120  | 2659307  | 1.07 |
| 0.97 | 3413203  | 3125193  | 1.09 |
| 1    | 7955978  | 7016638  | 1.13 |
| 0.99 | 2.07E+07 | 1.93E+07 | 1.07 |
| 1    | 2.98E+07 | 2.65E+07 | 1.12 |
| 0.99 | 2876574  | 2792307  | 1.03 |
| 0.99 | 2876574  | 2792307  | 1.03 |
| 0.93 | 1.48E+07 | 1.11E+07 | 1.33 |
| 0.98 | 1.87E+07 | 1.71E+07 | 1.09 |
| 0.98 | 1.87E+07 | 1.71E+07 | 1.09 |
| 0.98 | 2.34E+07 | 1.85E+07 | 1.26 |
| 0.93 | 2.03E+07 | 2.10E+07 | 0.97 |
| 0.93 | 2.03E+07 | 2.10E+07 | 0.97 |
| 0.91 | 2.76E+07 | 3.34E+07 | 0.83 |
| 0.9  | 4.77E+07 | 6.56E+07 | 0.73 |
| 0.89 | 2932575  | 2187653  | 1.34 |
| 0.99 | 7452856  | 7008380  | 1.06 |
| 1    | 2.12E+07 | 1.68E+07 | 1.26 |
| 1    | 9.70E+07 | 8.01E+07 | 1.21 |
| 1    | 1.19E+08 | 9.71E+07 | 1.23 |
| 0.88 | 648499   | 1202273  | 0.54 |
| 0.92 | 1750570  | 881073   | 1.99 |
| 1    | 3599509  | 3283717  | 1.10 |
| 1    | 3599509  | 3283717  | 1.10 |
| 0.99 | 4167723  | 3808728  | 1.09 |
| 0.92 | 4968080  | 5334401  | 0.93 |
| 1    | 1.61E+07 | 1.48E+07 | 1.09 |
| 1    | 3010854  | 2637182  | 1.14 |
| 1    | 3010854  | 2637182  | 1.14 |
| 0.93 | 1856384  | 1647437  | 1.13 |
| 0.93 | 1856384  | 1647437  | 1.13 |
| 1    | 2.12E+07 | 1.91E+07 | 1.11 |
| 1    | 3.28E+07 | 3.15E+07 | 1.04 |
| 1    | 3.28E+07 | 3.15E+07 | 1.04 |
| 1    | 4.40E+07 | 4.07E+07 | 1.08 |
| 0.99 | 5.59E+07 | 4.68E+07 | 1.19 |
| 0.99 | 5.59E+07 | 4.68E+07 | 1.19 |
| 0.99 | 1.30E+07 | 1.32E+07 | 0.98 |
| 1    | 7.48E+07 | 6.87E+07 | 1.09 |
| 0.99 | 9.07E+07 | 8.16E+07 | 1.11 |
| 0.92 | 949321   | 945854   | 1.00 |
| 0.96 | 2539765  | 2542611  | 1.00 |
| 1    | 2.63E+07 | 2.59E+07 | 1.02 |
| 0.99 | 4662714  | 3581165  | 1.30 |
| 0.95 | 2757503  | 3647060  | 0.76 |
| 0.95 | 2757503  | 3647060  | 0.76 |
| 0.98 | 4417909  | 2367348  | 1.87 |
| 0.99 | 5165717  | 4114904  | 1.26 |

|      |          |          |      |
|------|----------|----------|------|
| 0.92 | 1892166  | 1450861  | 1.30 |
| 0.99 | 3906723  | 3554597  | 1.10 |
| 0.99 | 3906723  | 3554597  | 1.10 |
| 1    | 2.66E+07 | 2.37E+07 | 1.12 |
| 0.91 | 1122294  | 1267445  | 0.89 |
| 0.86 | 3727218  | 3524555  | 1.06 |
| 0.98 | 1.67E+07 | 1.74E+07 | 0.96 |
| 0.98 | 1.67E+07 | 1.74E+07 | 0.96 |
| 0.97 | 2243124  | 2.68E+07 | 0.08 |
| 0.97 | 2243124  | 2.68E+07 | 0.08 |
| 0.92 | 2.89E+07 | 3.36E+07 | 0.86 |
| 0.92 | 2.89E+07 | 3.36E+07 | 0.86 |
| 0.95 | 858457   | 808421   | 1.06 |
| 0.89 | 1.94E+07 | 1.01E+07 | 1.92 |
| 0.93 | 2.00E+07 | 2.21E+07 | 0.90 |
| 0.95 | 5650649  | 5013856  | 1.13 |
| 0.96 | 6373821  | 6073680  | 1.05 |
| 0.96 | 6373821  | 6073680  | 1.05 |
| 0.99 | 9056014  | 7001476  | 1.29 |
| 0.85 | 959331   | 962324   | 1.00 |
| 0.99 | 1.22E+07 | 1.12E+07 | 1.09 |
| 0.99 | 1.68E+07 | 1.58E+07 | 1.06 |
| 0.99 | 1.68E+07 | 1.58E+07 | 1.06 |
| 0.9  | 1.48E+07 | 1.06E+07 | 1.40 |
| 0.9  | 1.48E+07 | 1.06E+07 | 1.40 |
| 0.96 | 1008639  | 1046544  | 0.96 |
| 0.99 | 2959155  | 2906505  | 1.02 |
| 0.98 | 3257497  | 3415350  | 0.95 |
| 0.86 | 1.23E+07 | 1.55E+07 | 0.79 |
| 0.99 | 3162605  | 3215029  | 0.98 |
| 0.98 | 1098066  | 1169151  | 0.94 |
| 0.93 | 952500   | 1022766  | 0.93 |
| 0.81 | 1726708  | 1634134  | 1.06 |
| 0.96 | 5222738  | 4327226  | 1.21 |
| 0.99 | 1.33E+07 | 1.19E+07 | 1.12 |
| 0.99 | 2.25E+07 | 1.99E+07 | 1.13 |
| 1    | 1.95E+07 | 1.80E+07 | 1.08 |
| 1    | 3384469  | 3289174  | 1.03 |
| 0.1  | 2879878  | 1522707  | 1.89 |
| 0.95 | 7101898  | 7262454  | 0.98 |
| 0.98 | 2042909  | 2419850  | 0.84 |
| 0.98 | 2042909  | 2419850  | 0.84 |
| 0.99 | 2.56E+07 | 2.11E+07 | 1.21 |
| 0.99 | 2.56E+07 | 2.11E+07 | 1.21 |
| 0.99 | 2.56E+07 | 2.11E+07 | 1.21 |
| 0.77 | 8731777  | 1.40E+07 | 0.62 |
| 0.97 | 1977907  | 2159862  | 0.92 |
| 0.94 | 9533763  | 3572640  | 2.67 |
| 0.99 | 4219316  | 3908352  | 1.08 |
| 0.99 | 4219316  | 3908352  | 1.08 |
| 0.95 | 4922867  | 4048921  | 1.22 |

|      |          |          |      |
|------|----------|----------|------|
| 0.95 | 4922867  | 4048921  | 1.22 |
| 0.95 | 5291062  | 4409476  | 1.20 |
| 0.98 | 6465955  | 6663083  | 0.97 |
| 0.99 | 1.05E+07 | 8464111  | 1.24 |
| 0.89 | 702782   | 851499   | 0.83 |
| 0.95 | 7266404  | 5304921  | 1.37 |
| 0.98 | 537311   | 509418   | 1.05 |
| 0.9  | 3086263  | 2801353  | 1.10 |
| 0.96 | 3003154  | 2944938  | 1.02 |
| 0.96 | 3003154  | 2944938  | 1.02 |
| 0.78 | 1067106  | 3134211  | 0.34 |
| 0.96 | 1.37E+07 | 1.46E+07 | 0.94 |
| 1    | 1.82E+07 | 1.79E+07 | 1.02 |
| 0.98 | 2453955  | 2845797  | 0.86 |
| 0.98 | 2453955  | 2845797  | 0.86 |
| 0.99 | 4406774  | 4951569  | 0.89 |
| 0.93 | 4815737  | 6186770  | 0.78 |
| 0.92 | 1.11E+07 | 1.31E+07 | 0.85 |
| 0.96 | 3020414  | 2299271  | 1.31 |
| 0.99 | 1.01E+07 | 7440757  | 1.36 |
| 1    | 3.02E+07 | 2.28E+07 | 1.32 |
| 1    | 3.02E+07 | 2.28E+07 | 1.32 |
| 1    | 7.75E+07 | 5.96E+07 | 1.30 |
| 0.97 | 4141091  | 3495079  | 1.18 |
| 0.61 | 2151309  | 858768   | 2.51 |
| 1    | 3735824  | 3044672  | 1.23 |
| 0.98 | 6273355  | 5371682  | 1.17 |
| 0.98 | 6273355  | 5371682  | 1.17 |
| 0.89 | 1.44E+07 | 2.30E+07 | 0.63 |
| 0.84 | 2180373  | 2066720  | 1.05 |
| 0.89 | 2840288  | 2997771  | 0.95 |
| 0.97 | 3066398  | 3302694  | 0.93 |
| 0.94 | 4138790  | 3662787  | 1.13 |
| 0.96 | 2992495  | 1939984  | 1.54 |
| 0.81 | 4030623  | 3525255  | 1.14 |
| 0.99 | 6672071  | 8765598  | 0.76 |
| 0.99 | 6672071  | 8765598  | 0.76 |
| 0.98 | 1.98E+07 | 1.96E+07 | 1.01 |
| 0.96 | 3.97E+07 | 3.90E+07 | 1.02 |
| 1    | 1.60E+08 | 1.39E+08 | 1.15 |
| 1    | 8280638  | 7957227  | 1.04 |
| 0.93 | 1.20E+07 | 1.18E+07 | 1.02 |
| 0.99 | 1597386  | 1322766  | 1.21 |
| 0.99 | 1850385  | 1643410  | 1.13 |
| 0.89 | 3194551  | 2514472  | 1.27 |
| 0.98 | 1.04E+07 | 8418595  | 1.24 |
| 0.98 | 1.04E+07 | 8418595  | 1.24 |
| 0.94 | 9923870  | 9088911  | 1.09 |
| 0.99 | 1.16E+07 | 9559406  | 1.21 |
| 1    | 1.78E+07 | 1.57E+07 | 1.13 |
| 1    | 1.81E+07 | 1.70E+07 | 1.06 |



|      |          |          |      |
|------|----------|----------|------|
| 1    | 2.84E+07 | 2.73E+07 | 1.04 |
| 0.99 | 6109751  | 5114726  | 1.19 |
| 0.99 | 6387552  | 6442256  | 0.99 |
| 0.99 | 6387552  | 6442256  | 0.99 |
| 0.99 | 6387552  | 6442256  | 0.99 |
| 0.96 | 1.27E+07 | 1.62E+07 | 0.78 |
| 0.95 | 1.59E+07 | 1.68E+07 | 0.95 |
| 0.96 | 2.91E+07 | 2.90E+07 | 1.00 |
| 1    | 1.37E+08 | 1.23E+08 | 1.11 |
| 0.93 | 483285   | 325257   | 1.49 |
| 0.98 | 3283316  | 3325281  | 0.99 |
| 1    | 6826307  | 6573734  | 1.04 |
| 0.96 | 4457805  | 4376922  | 1.02 |
| 0.96 | 4457805  | 4376922  | 1.02 |
| 0.92 | 8409876  | 1.35E+07 | 0.62 |
| 0.99 | 2319959  | 1858101  | 1.25 |
| 1    | 3.52E+07 | 4.99E+07 | 0.71 |
| 0.76 | 4130989  | 3742077  | 1.10 |
| 0.96 | 4346833  | 4018081  | 1.08 |
| 0.99 | 1.85E+07 | 1.72E+07 | 1.08 |
| 0.89 | 2.99E+07 | 2.18E+07 | 1.37 |
| 1    | 4.71E+07 | 3.78E+07 | 1.25 |
| 0.94 | 2351845  | 3225218  | 0.73 |
| 0.89 | 2911003  | 2530227  | 1.15 |
| 0.98 | 6147213  | 5242940  | 1.17 |
| 0.94 | 6068846  | 5977256  | 1.02 |
| 0.89 | 1.82E+07 | 1.11E+07 | 1.64 |
| 0.98 | 1.50E+07 | 1.39E+07 | 1.08 |
| 0.93 | 1.62E+07 | 1.79E+07 | 0.91 |
| 0.96 | 2.82E+07 | 2.05E+07 | 1.38 |
| 0.99 | 2.33E+07 | 2.15E+07 | 1.08 |
| 0.96 | 3.82E+07 | 3.00E+07 | 1.27 |
| 0.95 | 3.83E+07 | 3.09E+07 | 1.24 |
| 0.99 | 3.58E+07 | 3.60E+07 | 0.99 |
| 0.96 | 993783   | 825307   | 1.20 |
| 0.96 | 993783   | 825307   | 1.20 |
| 0.77 | 1058000  | 2655865  | 0.40 |
| 0.98 | 3023790  | 2600435  | 1.16 |
| 0.82 | 5060629  | 4617597  | 1.10 |
| 0.98 | 1.56E+07 | 1.46E+07 | 1.07 |
| 0.98 | 4355716  | 3839513  | 1.13 |
| 0.98 | 3690719  | 3161952  | 1.17 |
| 0.94 | 646964   | 816182   | 0.79 |
| 0.94 | 646964   | 816182   | 0.79 |
| 0.46 | 2.80E+07 | 2.34E+07 | 1.20 |
| 0.98 | 3.10E+07 | 2.64E+07 | 1.17 |
| 0.9  | 767811   | 630919   | 1.22 |
| 0.81 | 4703188  | 2443657  | 1.92 |
| 0.81 | 4703188  | 2443657  | 1.92 |
| 0.97 | 3753420  | 3758822  | 1.00 |
| 0.98 | 5909226  | 5964356  | 0.99 |

|      |          |          |      |
|------|----------|----------|------|
| 0.91 | 8463804  | 8749553  | 0.97 |
| 0.91 | 9601415  | 9565018  | 1.00 |
| 1    | 1.14E+07 | 9952779  | 1.15 |
| 1    | 1.80E+08 | 1.68E+08 | 1.07 |
| 0.98 | 3850548  | 3452640  | 1.12 |
| 1    | 1.82E+07 | 1.64E+07 | 1.11 |
| 0.9  | 4090391  | 4101820  | 1.00 |
| 0.92 | 7264522  | 6937168  | 1.05 |
| 0.97 | 1.46E+07 | 1.34E+07 | 1.09 |
| 1    | 3.33E+07 | 3.02E+07 | 1.10 |
| 0.77 | 3673549  | 5112281  | 0.72 |
| 0.89 | 2911003  | 2530227  | 1.15 |
| 0.98 | 6147213  | 5242940  | 1.17 |
| 0.98 | 5552654  | 5259928  | 1.06 |
| 0.89 | 1.82E+07 | 1.11E+07 | 1.64 |
| 0.96 | 1.30E+07 | 1.24E+07 | 1.05 |
| 0.93 | 1.62E+07 | 1.79E+07 | 0.91 |
| 0.99 | 2.33E+07 | 2.15E+07 | 1.08 |
| 0.95 | 3.83E+07 | 3.09E+07 | 1.24 |
| 0.95 | 3.83E+07 | 3.09E+07 | 1.24 |
| 0.76 | 1.90E+07 | 1.00E+07 | 1.90 |
| 0.97 | 4259639  | 3114499  | 1.37 |
| 0.95 | 2425579  | 2226592  | 1.09 |
| 1    | 5377955  | 4718069  | 1.14 |
| 1    | 467839   | 404482   | 1.16 |
| 1    | 467839   | 404482   | 1.16 |
| 0.98 | 1.61E+07 | 1.58E+07 | 1.02 |
| 0.97 | 1.58E+07 | 1.68E+07 | 0.94 |
| 0.84 | 4168743  | 3489408  | 1.19 |
| 0.95 | 1755474  | 1774170  | 0.99 |
| 0.98 | 2546807  | 2655617  | 0.96 |
| 0.98 | 1.19E+07 | 1.18E+07 | 1.01 |
| 0.98 | 1.19E+07 | 1.18E+07 | 1.01 |
| 0.98 | 7713481  | 7416477  | 1.04 |
| 0.99 | 1.14E+07 | 1.12E+07 | 1.02 |
| 0.93 | 1.62E+07 | 1.47E+07 | 1.10 |
| 0.99 | 2485704  | 2341929  | 1.06 |
| 0.99 | 2485704  | 2341929  | 1.06 |
| 0.96 | 5475737  | 5212796  | 1.05 |
| 0.96 | 5475737  | 5212796  | 1.05 |
| 0.96 | 3123858  | 2412179  | 1.30 |
| 0.96 | 3759187  | 2226803  | 1.69 |
| 0.17 | 1278391  | 4754929  | 0.27 |
| 0.96 | 2972525  | 2684652  | 1.11 |
| 0.94 | 6790819  | 6124562  | 1.11 |
| 0.94 | 6790819  | 6124562  | 1.11 |
| 0.99 | 582056   | 609275   | 0.96 |
| 0.91 | 2786394  | 2626891  | 1.06 |
| 1    | 4773855  | 4857670  | 0.98 |
| 0.99 | 4929732  | 5109058  | 0.96 |
| 1    | 1.80E+08 | 1.70E+08 | 1.06 |

|      |          |          |      |
|------|----------|----------|------|
| 0.96 | 2799497  | 2712473  | 1.03 |
| 0.96 | 2799497  | 2712473  | 1.03 |
| 0.88 | 1.41E+07 | 2.06E+07 | 0.68 |
| 0.93 | 1366723  | 1206206  | 1.13 |
| 0.97 | 2841387  | 2234616  | 1.27 |
| 0.92 | 5739647  | 5023139  | 1.14 |
| 0.9  | 7028816  | 3737117  | 1.88 |
| 0.94 | 2304764  | 1549923  | 1.49 |
| 0.95 | 8803317  | 1.14E+07 | 0.77 |
| 0.99 | 1.05E+07 | 8337482  | 1.26 |
| 1    | 2103193  | 2226898  | 0.94 |
| 0.86 | 481028   | 403584   | 1.19 |
| 0.99 | 2950525  | 2766122  | 1.07 |
| 0.96 | 5846560  | 6455940  | 0.91 |
| 0.97 | 1.82E+07 | 1.62E+07 | 1.12 |
| 1    | 5.46E+07 | 4.89E+07 | 1.12 |
| 1    | 7.74E+07 | 7.25E+07 | 1.07 |
| 1    | 8.25E+07 | 7.44E+07 | 1.11 |
| 0.99 | 1529502  | 1602031  | 0.95 |
| 0.99 | 2650649  | 2634612  | 1.01 |
| 0.99 | 4015510  | 4157180  | 0.97 |
| 0.94 | 4142947  | 4157706  | 1.00 |
| 0.99 | 4747529  | 4694873  | 1.01 |
| 0.75 | 6339999  | 9238095  | 0.69 |
| 0.99 | 1.72E+07 | 1.79E+07 | 0.96 |
| 0.99 | 9059753  | 8908074  | 1.02 |
| 0.99 | 9920581  | 9359565  | 1.06 |
| 0.99 | 9.51E+07 | 9.77E+07 | 0.97 |
| 0.92 | 722109   | 383332   | 1.88 |
| 0.99 | 3618136  | 5592492  | 0.65 |
| 0.95 | 9561141  | 5965566  | 1.60 |
| 0.98 | 6122791  | 6488475  | 0.94 |
| 0.87 | 1860281  | 2127144  | 0.87 |
| 0.97 | 3488284  | 2635752  | 1.32 |
| 0.97 | 3488284  | 2635752  | 1.32 |
| 0.93 | 1.46E+07 | 1.12E+07 | 1.30 |
| 0.93 | 1.46E+07 | 1.12E+07 | 1.30 |
| 0.95 | 541327   | 519612   | 1.04 |
| 0.93 | 5504671  | 4511899  | 1.22 |
| 0.99 | 8920810  | 7880293  | 1.13 |
| 0.86 | 5183784  | 4233572  | 1.22 |
| 0.94 | 1.32E+07 | 1.25E+07 | 1.06 |
| 0.94 | 1495592  | 1550907  | 0.96 |
| 0.99 | 4563791  | 4654238  | 0.98 |
| 0.94 | 4078891  | 3212882  | 1.27 |
| 0.91 | 2851563  | 2874414  | 0.99 |
| 0.79 | 3497180  | 3101850  | 1.13 |
| 0.99 | 3729228  | 3210852  | 1.16 |
| 0.85 | 2281097  | 2140313  | 1.07 |
| 0.87 | 2936908  | 2495662  | 1.18 |
| 0.98 | 1224856  | 1025051  | 1.19 |

|      |          |          |      |
|------|----------|----------|------|
| 0.93 | 1487481  | 1730467  | 0.86 |
| 0.87 | 1348051  | 1750730  | 0.77 |
| 0.97 | 2474786  | 2052891  | 1.21 |
| 0.97 | 2474786  | 2052891  | 1.21 |
| 0.96 | 7442117  | 4572762  | 1.63 |
| 0.96 | 7442117  | 4572762  | 1.63 |
| 0.96 | 7442117  | 4572762  | 1.63 |
| 0.99 | 1.81E+07 | 1.62E+07 | 1.12 |
| 0.9  | 2.40E+07 | 6487320  | 3.70 |
| 0.96 | 1608435  | 1754916  | 0.92 |
| 0.96 | 3999106  | 3616849  | 1.11 |
| 0.99 | 1.50E+07 | 1.65E+07 | 0.91 |
| 0.99 | 3280708  | 2925294  | 1.12 |
| 0.95 | 8599491  | 4926130  | 1.75 |
| 1    | 2.10E+07 | 1.72E+07 | 1.22 |
| 0.85 | 2838423  | 1581343  | 1.79 |
| 0.79 | 2.60E+07 | 2.68E+07 | 0.97 |
| 0.95 | 7.08E+07 | 7.14E+07 | 0.99 |
| 0.85 | 694126   | 657115   | 1.06 |
| 0.93 | 788577   | 785934   | 1.00 |
| 0.94 | 2591354  | 1780776  | 1.46 |
| 0.96 | 2600740  | 1996343  | 1.30 |
| 0.98 | 1648604  | 3353217  | 0.49 |
| 0.99 | 4920511  | 4050883  | 1.21 |
| 0.99 | 4920511  | 4050883  | 1.21 |
| 0.99 | 6666301  | 5009481  | 1.33 |
| 0.99 | 6652883  | 7174581  | 0.93 |
| 0.99 | 1.25E+07 | 1.05E+07 | 1.19 |
| 0.99 | 1.25E+07 | 1.05E+07 | 1.19 |
| 1    | 1.16E+07 | 1.07E+07 | 1.08 |
| 1    | 1.35E+07 | 1.10E+07 | 1.23 |
| 0.98 | 1.25E+07 | 1.17E+07 | 1.07 |
| 0.9  | 2.18E+07 | 2.09E+07 | 1.04 |
| 0.9  | 2.18E+07 | 2.09E+07 | 1.04 |
| 0.88 | 3.07E+07 | 2.98E+07 | 1.03 |
| 0.89 | 1241346  | 1033991  | 1.20 |
| 0.99 | 3.67E+07 | 3.85E+07 | 0.95 |
| 0.99 | 4252929  | 4166849  | 1.02 |
| 0.98 | 7925576  | 7169352  | 1.11 |
| 0.81 | 4.49E+07 | 2.74E+07 | 1.64 |
| 0.96 | 1.27E+08 | 1.57E+08 | 0.81 |
| 0.96 | 6604565  | 5059664  | 1.31 |
| 0.99 | 1.09E+07 | 8223520  | 1.33 |
| 0.84 | 3521559  | 529297   | 6.65 |
| 0.97 | 1871527  | 896432   | 2.09 |
| 0.99 | 6546852  | 5980402  | 1.09 |
| 0.99 | 8373391  | 7349411  | 1.14 |
| 0.99 | 3692487  | 3333146  | 1.11 |
| 0.98 | 6148968  | 5453641  | 1.13 |
| 0.98 | 1137663  | 780463   | 1.46 |
| 0.8  | 1068913  | 1060493  | 1.01 |

|      |          |          |      |
|------|----------|----------|------|
| 0.94 | 1510526  | 1195875  | 1.26 |
| 0.93 | 1393107  | 1446708  | 0.96 |
| 0.76 | 1680819  | 1604283  | 1.05 |
| 0.97 | 2961381  | 2522204  | 1.17 |
| 0.98 | 3638512  | 2853736  | 1.27 |
| 0.96 | 9048085  | 8231499  | 1.10 |
| 0.96 | 9048085  | 8231499  | 1.10 |
| 0.99 | 1.12E+07 | 9366908  | 1.20 |
| 0.94 | 2.59E+07 | 2.32E+07 | 1.12 |
| 0.99 | 1539159  | 1621073  | 0.95 |
| 0.95 | 1971100  | 1683675  | 1.17 |
| 0.97 | 3416166  | 3034009  | 1.13 |
| 0.99 | 5707169  | 5616131  | 1.02 |
| 0.9  | 1202706  | 1072293  | 1.12 |
| 0.99 | 3202220  | 2603609  | 1.23 |
| 0.95 | 3752467  | 4465307  | 0.84 |
| 0.87 | 1.54E+07 | 1.66E+07 | 0.93 |
| 0.97 | 2738563  | 2526146  | 1.08 |
| 0.97 | 2949634  | 2938919  | 1.00 |
| 0.84 | 9467293  | 6940910  | 1.36 |
| 0.89 | 1.46E+07 | 1.82E+07 | 0.80 |
| 0.99 | 2.21E+07 | 1.83E+07 | 1.21 |
| 1    | 2.48E+07 | 2.21E+07 | 1.12 |
| 1    | 3.64E+07 | 3.41E+07 | 1.07 |
| 1    | 3.64E+07 | 3.41E+07 | 1.07 |
| 0.97 | 3296853  | 3431957  | 0.96 |
| 0.85 | 1720917  | 1448852  | 1.19 |
| 0.94 | 1441316  | 1151333  | 1.25 |
| 0.91 | 1168740  | 1337722  | 0.87 |
| 0.91 | 355344   | 467749   | 0.76 |
| 1    | 3802911  | 3604374  | 1.06 |
| 0.97 | 9196615  | 8727342  | 1.05 |
| 0.98 | 1.25E+07 | 1.53E+07 | 0.82 |
| 0.98 | 1.25E+07 | 1.53E+07 | 0.82 |
| 0.89 | 3123744  | 2678118  | 1.17 |
| 0.95 | 3267640  | 2080959  | 1.57 |
| 0.95 | 1.01E+07 | 1.12E+07 | 0.90 |
| 1    | 2.20E+07 | 1.95E+07 | 1.13 |
| 1    | 2.20E+07 | 1.95E+07 | 1.13 |
| 0.61 | 3234770  | 1065672  | 3.04 |
| 0.99 | 3004667  | 2253107  | 1.33 |
| 0.99 | 3004667  | 2253107  | 1.33 |
| 0.93 | 2938828  | 3127111  | 0.94 |
| 0.84 | 1445957  | 1147793  | 1.26 |
| 0.98 | 1071886  | 1156256  | 0.93 |
| 0.9  | 960516   | 770971   | 1.25 |
| 0.95 | 1798379  | 1378640  | 1.30 |
| 0.72 | 662324   | 1075000  | 0.62 |
| 0.99 | 3393005  | 3086760  | 1.10 |
| 0.95 | 405663   | 301563   | 1.35 |
| 1    | 2.10E+07 | 1.76E+07 | 1.19 |

|      |          |          |        |
|------|----------|----------|--------|
| 1    | 2.10E+07 | 1.76E+07 | 1.19   |
| 0.99 | 2.65E+07 | 2.20E+07 | 1.20   |
| 0.97 | 3091793  | 1658449  | 1.86   |
| 0.93 | 2504153  | 2437409  | 1.03   |
| 0.71 | 6886238  | 2596721  | 2.65   |
| 0.9  | 2270772  | 2702955  | 0.84   |
| 0.85 | 3469221  | 3300158  | 1.05   |
| 0.99 | 1.21E+07 | 6279520  | 1.93   |
| 0.99 | 1.21E+07 | 6279520  | 1.93   |
| 0.99 | 1.21E+07 | 6279520  | 1.93   |
| 0.99 | 1.21E+07 | 6279520  | 1.93   |
| 0.98 | 7055723  | 6667252  | 1.06   |
| 0.99 | 7165468  | 9138710  | 0.78   |
| 0.99 | 7165468  | 9138710  | 0.78   |
| 0.98 | 1.75E+07 | 1.46E+07 | 1.20   |
| 1    | 1.43E+07 | 1.77E+07 | 0.81   |
| 0.98 | 2.12E+07 | 1.95E+07 | 1.09   |
| 0.71 | 3565073  | 1.96E+07 | 0.18   |
| 1    | 2.54E+07 | 2.76E+07 | 0.92   |
| 1    | 2.67E+07 | 3.00E+07 | 0.89   |
| 0.57 | 6.00E+07 | 5.22E+07 | 1.15   |
| 0.92 | 1796488  | 1289892  | 1.39   |
| 0.97 | 2502550  | 1551628  | 1.61   |
| 0.99 | 3286991  | 1907376  | 1.72   |
| 0.97 | 8679113  | 5242859  | 1.66   |
| 0.96 | 1.05E+07 | 8018078  | 1.31   |
| 0.99 | 1.24E+07 | 1.08E+07 | 1.15   |
| 0.8  | 2.46E+07 | 174725   | 140.79 |
| 0.99 | 5442489  | 4499328  | 1.21   |
| 0.99 | 5442489  | 4499328  | 1.21   |
| 1    | 1.16E+07 | 9820291  | 1.18   |
| 0.97 | 615386   | 598704   | 1.03   |
| 0.99 | 984700   | 1030742  | 0.96   |
| 0.99 | 4366130  | 3386871  | 1.29   |
| 0.99 | 7143342  | 6787753  | 1.05   |
| 0.84 | 5714228  | 5359758  | 1.07   |
| 0.52 | 1644441  | 1638404  | 1.00   |
| 0.92 | 3210420  | 2871833  | 1.12   |
| 0.99 | 1.54E+07 | 1.35E+07 | 1.14   |
| 0.99 | 2.70E+07 | 2.40E+07 | 1.13   |
| 0.93 | 2430874  | 1606671  | 1.51   |
| 0.95 | 2981284  | 1824823  | 1.63   |
| 1    | 8149362  | 6391911  | 1.27   |
| 0.99 | 2897872  | 2841248  | 1.02   |
| 0.99 | 2897872  | 2841248  | 1.02   |
| 0.78 | 8308520  | 8428951  | 0.99   |
| 0.97 | 6516132  | 6674172  | 0.98   |
| 0.97 | 6516132  | 6674172  | 0.98   |
| 0.97 | 6516132  | 6674172  | 0.98   |
| 1    | 1.41E+07 | 1.11E+07 | 1.27   |
| 0.95 | 1.22E+07 | 1.15E+07 | 1.06   |

|      |          |          |      |
|------|----------|----------|------|
| 0.95 | 1.22E+07 | 1.15E+07 | 1.06 |
| 0.99 | 2.94E+07 | 2.47E+07 | 1.19 |
| 1    | 1.13E+07 | 1.04E+07 | 1.09 |
| 0.75 | 2629763  | 1958288  | 1.34 |
| 0.94 | 2022058  | 2431381  | 0.83 |
| 0.97 | 2755480  | 3125697  | 0.88 |
| 0.85 | 3254601  | 5.79E+07 | 0.06 |
| 1    | 1.56E+08 | 1.35E+08 | 1.16 |
| 0.76 | 2489825  | 6.71E+07 | 0.04 |
| 0.97 | 4016425  | 4493147  | 0.89 |
| 0.96 | 2.30E+07 | 2.01E+07 | 1.14 |
| 0.99 | 7803773  | 7235848  | 1.08 |
| 0.99 | 7803773  | 7235848  | 1.08 |
| 0.91 | 889408   | 581479   | 1.53 |
| 0.95 | 1057993  | 973043   | 1.09 |
| 0.95 | 4330049  | 3676430  | 1.18 |
| 0.95 | 984562   | 860402   | 1.14 |
| 0.9  | 983829   | 942985   | 1.04 |
| 0.96 | 1433528  | 1489472  | 0.96 |
| 0.72 | 3561572  | 1831776  | 1.94 |
| 1    | 2249235  | 1967449  | 1.14 |
| 0.99 | 3609431  | 3216814  | 1.12 |
| 0.99 | 5409336  | 4428918  | 1.22 |
| 0.99 | 6438053  | 5536641  | 1.16 |
| 0.99 | 6438053  | 5536641  | 1.16 |
| 0.98 | 1809134  | 1565321  | 1.16 |
| 0.93 | 3680084  | 4336486  | 0.85 |
| 0.97 | 3940783  | 4467645  | 0.88 |
| 0.96 | 9036411  | 8042022  | 1.12 |
| 0.99 | 2.11E+07 | 1.65E+07 | 1.28 |
| 1    | 2.57E+07 | 2.20E+07 | 1.17 |
| 1    | 6.88E+07 | 6.00E+07 | 1.15 |
| 0.98 | 1416897  | 1168929  | 1.21 |
| 0.98 | 1416897  | 1168929  | 1.21 |
| 0.93 | 3889838  | 3510179  | 1.11 |
| 0.97 | 4394348  | 3595473  | 1.22 |
| 0.99 | 6463041  | 5158129  | 1.25 |
| 0.99 | 6463041  | 5158129  | 1.25 |
| 0.96 | 4.65E+07 | 4.86E+07 | 0.96 |
| 0.99 | 6.92E+07 | 5.90E+07 | 1.17 |
| 0.99 | 5.94E+07 | 6.08E+07 | 0.98 |
| 0.99 | 1.77E+07 | 1.63E+07 | 1.09 |
| 0.99 | 1.77E+07 | 1.63E+07 | 1.09 |
| 0.98 | 1.68E+07 | 1.69E+07 | 0.99 |
| 0.98 | 1.68E+07 | 1.69E+07 | 0.99 |
| 0.9  | 750354   | 703524   | 1.07 |
| 0.9  | 750354   | 703524   | 1.07 |
| 0.76 | 1896525  | 1717490  | 1.10 |
| 0.86 | 3286130  | 2975014  | 1.10 |
| 0.98 | 2128475  | 3003509  | 0.71 |
| 0.99 | 3509762  | 4541958  | 0.77 |

|      |          |          |      |
|------|----------|----------|------|
| 0.99 | 7896686  | 6600470  | 1.20 |
| 0.96 | 8293279  | 7004870  | 1.18 |
| 0.95 | 8549748  | 9265070  | 0.92 |
| 0.99 | 1.71E+07 | 1.64E+07 | 1.04 |
| 0.96 | 2.32E+07 | 2.57E+07 | 0.90 |
| 0.96 | 2.32E+07 | 2.57E+07 | 0.90 |
| 0.99 | 3.19E+07 | 3.22E+07 | 0.99 |
| 0.98 | 3.30E+07 | 3.55E+07 | 0.93 |
| 1    | 5.97E+07 | 5.61E+07 | 1.06 |
| 0.94 | 1614263  | 1024957  | 1.57 |
| 0.88 | 1602339  | 1324736  | 1.21 |
| 0.98 | 1139719  | 1004712  | 1.13 |
| 0.95 | 1938841  | 1686581  | 1.15 |
| 0.78 | 2503663  | 2816119  | 0.89 |
| 0.99 | 4054546  | 3669869  | 1.10 |
| 0.94 | 4332511  | 4056456  | 1.07 |
| 0.85 | 6725097  | 5698356  | 1.18 |
| 1    | 5397978  | 5738657  | 0.94 |
| 0.98 | 6935392  | 6530748  | 1.06 |
| 0.98 | 1.43E+07 | 1.40E+07 | 1.02 |
| 0.95 | 1.35E+07 | 1.41E+07 | 0.96 |
| 0.98 | 1.51E+07 | 1.46E+07 | 1.03 |
| 0.99 | 1.77E+07 | 1.70E+07 | 1.04 |
| 0.95 | 2.19E+07 | 2.09E+07 | 1.05 |
| 0.95 | 2.19E+07 | 2.09E+07 | 1.05 |
| 0.95 | 2.19E+07 | 2.09E+07 | 1.05 |
| 1    | 2.35E+07 | 2.56E+07 | 0.92 |
| 1    | 3.41E+07 | 3.68E+07 | 0.93 |
| 1    | 4.69E+07 | 5.13E+07 | 0.91 |
| 1    | 4.69E+07 | 5.13E+07 | 0.91 |
| 0.76 | 2.28E+07 | 8497820  | 2.68 |
| 0.96 | 1.71E+07 | 1.21E+07 | 1.41 |
| 0.96 | 1347742  | 1188642  | 1.13 |
| 0.98 | 2595164  | 2372194  | 1.09 |
| 0.99 | 5558741  | 4016989  | 1.38 |
| 0.99 | 5558741  | 4016989  | 1.38 |
| 0.96 | 8188093  | 7583981  | 1.08 |
| 0.99 | 1.22E+07 | 1.11E+07 | 1.10 |
| 0.99 | 1.22E+07 | 1.11E+07 | 1.10 |
| 0.93 | 1.88E+07 | 2.03E+07 | 0.93 |
| 0.99 | 3.12E+07 | 2.46E+07 | 1.27 |
| 0.95 | 1088215  | 1173108  | 0.93 |
| 1    | 2850998  | 2737589  | 1.04 |
| 0.96 | 1.10E+07 | 1.16E+07 | 0.95 |
| 1    | 1.22E+07 | 1.30E+07 | 0.94 |
| 0.98 | 1.27E+07 | 1.47E+07 | 0.86 |
| 0.88 | 2.23E+07 | 2.27E+07 | 0.98 |
| 0.99 | 2.80E+07 | 2.52E+07 | 1.11 |
| 0.88 | 1.05E+08 | 1.27E+08 | 0.83 |
| 0.98 | 2945550  | 2669510  | 1.10 |
| 0.98 | 888901   | 680090   | 1.31 |



|      |          |          |      |
|------|----------|----------|------|
| 0.98 | 1056910  | 1222729  | 0.86 |
| 0.95 | 783478   | 736970   | 1.06 |
| 0.99 | 9458083  | 7810777  | 1.21 |
| 0.97 | 7.12E+08 | 4.78E+08 | 1.49 |
| 0.95 | 1246797  | 1094630  | 1.14 |
| 0.95 | 3468733  | 3292537  | 1.05 |
| 0.94 | 4388710  | 4104948  | 1.07 |
| 0.94 | 4388710  | 4104948  | 1.07 |
| 0.98 | 1.93E+07 | 1.66E+07 | 1.16 |
| 0.98 | 2.01E+07 | 1.85E+07 | 1.09 |
| 1    | 4.71E+07 | 4.61E+07 | 1.02 |
| 0.94 | 572122   | 871504   | 0.66 |
| 1    | 2584515  | 2286004  | 1.13 |
| 1    | 1973549  | 2389268  | 0.83 |
| 0.84 | 4209972  | 2407698  | 1.75 |
| 0.88 | 6488270  | 6525816  | 0.99 |
| 1    | 1.14E+07 | 9145297  | 1.25 |
| 0.99 | 1.38E+07 | 1.35E+07 | 1.02 |
| 0.99 | 2043456  | 1894117  | 1.08 |
| 0.99 | 5733014  | 5581293  | 1.03 |
| 0.99 | 6933192  | 6075442  | 1.14 |
| 1    | 2.26E+07 | 2.10E+07 | 1.08 |
| 0.81 | 216719   | 229869   | 0.94 |
| 0.96 | 1555418  | 1339081  | 1.16 |
| 0.73 | 2748057  | 2086214  | 1.32 |
| 0.89 | 1.14E+07 | 1.33E+07 | 0.86 |
| 0.98 | 1.10E+07 | 1.40E+07 | 0.79 |
| 1    | 6048154  | 5404143  | 1.12 |
| 0.97 | 429842   | 420381   | 1.02 |
| 0.88 | 1358651  | 1646454  | 0.83 |
| 0.94 | 3365873  | 3891755  | 0.86 |
| 0.96 | 3827649  | 3048830  | 1.26 |
| 1    | 3366346  | 3554005  | 0.95 |
| 1    | 3366346  | 3554005  | 0.95 |
| 0.96 | 1.42E+07 | 1.51E+07 | 0.94 |
| 0.99 | 2378746  | 1819255  | 1.31 |
| 0.95 | 3461187  | 3071653  | 1.13 |
| 0.99 | 6175760  | 4443488  | 1.39 |
| 0.98 | 9788041  | 6848299  | 1.43 |
| 0.91 | 8133372  | 7611986  | 1.07 |
| 0.99 | 8786248  | 8246251  | 1.07 |
| 0.93 | 3048848  | 2831603  | 1.08 |
| 0.99 | 8642644  | 7662928  | 1.13 |
| 0.97 | 8057723  | 8544581  | 0.94 |
| 0.98 | 8668360  | 9047604  | 0.96 |
| 0.99 | 1.37E+07 | 1.17E+07 | 1.17 |
| 0.99 | 1.37E+07 | 1.17E+07 | 1.17 |
| 0.99 | 4.74E+07 | 4.07E+07 | 1.16 |
| 0.73 | 2540764  | 986949   | 2.57 |
| 0.95 | 8142636  | 6358690  | 1.28 |
| 0.95 | 8142636  | 6358690  | 1.28 |

|      |          |          |      |
|------|----------|----------|------|
| 1    | 1.18E+07 | 1.11E+07 | 1.06 |
| 0.98 | 1.49E+07 | 1.52E+07 | 0.98 |
| 0.97 | 2088835  | 3700047  | 0.56 |
| 0.67 | 5293149  | 4279534  | 1.24 |
| 0.93 | 4811195  | 4624915  | 1.04 |
| 0.95 | 1849248  | 2032750  | 0.91 |
| 0.95 | 1849248  | 2032750  | 0.91 |
| 0.94 | 2725837  | 2620662  | 1.04 |
| 0.91 | 1111205  | 2601720  | 0.43 |
| 0.99 | 4235402  | 2760826  | 1.53 |
| 0.99 | 1285883  | 1278864  | 1.01 |
| 0.99 | 3723900  | 3364787  | 1.11 |
| 0.99 | 3723900  | 3364787  | 1.11 |
| 0.99 | 2873597  | 2366816  | 1.21 |
| 1    | 6371615  | 5345687  | 1.19 |
| 0.99 | 1.12E+07 | 1.10E+07 | 1.02 |
| 0.99 | 1.36E+07 | 1.38E+07 | 0.99 |
| 1    | 2.48E+07 | 2.48E+07 | 1.00 |
| 0.93 | 1441544  | 2350022  | 0.61 |
| 0.94 | 1289419  | 955406   | 1.35 |
| 0.94 | 1289419  | 955406   | 1.35 |
| 0.97 | 5275783  | 5064179  | 1.04 |
| 0.97 | 5275783  | 5064179  | 1.04 |
| 0.99 | 1.14E+07 | 9037580  | 1.26 |
| 0.99 | 4421270  | 2613030  | 1.69 |
| 0.81 | 1.44E+07 | 2.09E+07 | 0.69 |
| 0.94 | 1.59E+07 | 1.42E+07 | 1.12 |
| 0.99 | 8700755  | 6850318  | 1.27 |
| 0.94 | 1.16E+07 | 8241813  | 1.41 |
| 1    | 2.74E+07 | 2.63E+07 | 1.04 |
| 0.72 | 1450843  | 1649503  | 0.88 |
| 0.81 | 1.28E+07 | 1.41E+07 | 0.91 |
| 0.81 | 1.28E+07 | 1.41E+07 | 0.91 |
| 1    | 9.60E+07 | 8.13E+07 | 1.18 |
| 0.97 | 1201577  | 884597   | 1.36 |
| 0.94 | 6670041  | 5731729  | 1.16 |
| 1    | 5.36E+07 | 4.79E+07 | 1.12 |
| 0.94 | 1961476  | 1649918  | 1.19 |
| 0.98 | 9934905  | 1.10E+07 | 0.90 |
| 0.83 | 1.25E+07 | 1.17E+07 | 1.07 |
| 0.99 | 1.23E+07 | 1.03E+07 | 1.19 |
| 0.95 | 2867985  | 2066054  | 1.39 |
| 0.95 | 2867985  | 2066054  | 1.39 |
| 0.92 | 518195   | 395112   | 1.31 |
| 0.99 | 8957951  | 8881979  | 1.01 |
| 0.84 | 1954344  | 2622828  | 0.75 |
| 0.99 | 1311024  | 1475250  | 0.89 |
| 0.98 | 1242826  | 1518653  | 0.82 |
| 0.98 | 1242826  | 1518653  | 0.82 |
| 0.98 | 1242826  | 1518653  | 0.82 |
| 0.97 | 4810458  | 5630873  | 0.85 |

|      |          |          |      |
|------|----------|----------|------|
| 0.97 | 4810458  | 5630873  | 0.85 |
| 0.72 | 6057937  | 4289676  | 1.41 |
| 0.88 | 5739742  | 4308203  | 1.33 |
| 0.97 | 2.13E+07 | 1.58E+07 | 1.35 |
| 0.99 | 1.38E+07 | 1.27E+07 | 1.09 |
| 0.99 | 1.38E+07 | 1.27E+07 | 1.09 |
| 0.99 | 1.70E+07 | 1.73E+07 | 0.98 |
| 0.95 | 490989   | 357411   | 1.37 |
| 0.81 | 6263139  | 5050942  | 1.24 |
| 0.98 | 1073550  | 908401   | 1.18 |
| 0.92 | 1093702  | 998003   | 1.10 |
| 0.94 | 6578642  | 6332740  | 1.04 |
| 1    | 7.17E+07 | 6.50E+07 | 1.10 |
| 0.98 | 629022   | 791666   | 0.79 |
| 0.96 | 3817705  | 3085655  | 1.24 |
| 0.99 | 4778205  | 4360088  | 1.10 |
| 0.98 | 7161382  | 5811634  | 1.23 |
| 1    | 6799991  | 6785184  | 1.00 |
| 0.97 | 1.86E+07 | 1.94E+07 | 0.96 |
| 0.97 | 1.86E+07 | 1.94E+07 | 0.96 |
| 0.99 | 3.70E+07 | 2.77E+07 | 1.34 |
| 1    | 6.62E+07 | 6.91E+07 | 0.96 |
| 1    | 6.62E+07 | 6.91E+07 | 0.96 |
| 0.98 | 3850851  | 4174831  | 0.92 |
| 0.88 | 1585363  | 3254812  | 0.49 |
| 0.84 | 1765962  | 1917419  | 0.92 |
| 0.87 | 1228947  | 2422985  | 0.51 |
| 1    | 9.44E+07 | 8.59E+07 | 1.10 |
| 0.98 | 5316587  | 6423004  | 0.83 |
| 0.97 | 1.72E+07 | 1.30E+07 | 1.32 |
| 1    | 2.33E+07 | 2.04E+07 | 1.14 |
| 1    | 2.33E+07 | 2.04E+07 | 1.14 |
| 0.83 | 469095   | 771462   | 0.61 |
| 0.87 | 1891541  | 1339699  | 1.41 |
| 0.94 | 1808646  | 1730844  | 1.04 |
| 0.95 | 2.00E+07 | 1.51E+07 | 1.32 |
| 0.97 | 2.62E+07 | 2.35E+07 | 1.11 |
| 0.97 | 2.62E+07 | 2.35E+07 | 1.11 |
| 0.97 | 4.08E+07 | 3.63E+07 | 1.12 |
| 1    | 1.04E+08 | 8.58E+07 | 1.21 |
| 0.79 | 1.00E+07 | 9149996  | 1.09 |
| 0.95 | 1.21E+07 | 1.05E+07 | 1.15 |
| 0.91 | 3.99E+07 | 3.52E+07 | 1.13 |
| 0.99 | 6.29E+07 | 5.39E+07 | 1.17 |
| 0.99 | 2988585  | 2222508  | 1.34 |
| 0.97 | 1480258  | 1214729  | 1.22 |
| 0.98 | 1246375  | 1285673  | 0.97 |
| 0.98 | 3051716  | 1849548  | 1.65 |
| 0.94 | 4427623  | 4262856  | 1.04 |
| 0.98 | 6196719  | 4896967  | 1.27 |
| 0.98 | 6196719  | 4896967  | 1.27 |

|      |          |          |       |
|------|----------|----------|-------|
| 0.99 | 1.21E+07 | 1.14E+07 | 1.06  |
| 0.99 | 1.99E+07 | 1.87E+07 | 1.06  |
| 0.92 | 1.31E+07 | 1.49E+07 | 0.88  |
| 0.9  | 830693   | 1067121  | 0.78  |
| 0.9  | 830693   | 1067121  | 0.78  |
| 0.86 | 3260753  | 1337309  | 2.44  |
| 0.92 | 1416426  | 1513634  | 0.94  |
| 0.98 | 7156206  | 5083574  | 1.41  |
| 0.99 | 1.27E+07 | 1.27E+07 | 1.00  |
| 0.95 | 853573   | 768295   | 1.11  |
| 0.93 | 1355697  | 1300050  | 1.04  |
| 0.94 | 2142135  | 2049280  | 1.05  |
| 0.98 | 2246908  | 2149314  | 1.05  |
| 0.94 | 2694091  | 2162138  | 1.25  |
| 0.94 | 2462518  | 2465287  | 1.00  |
| 0.98 | 2332251  | 2614306  | 0.89  |
| 0.96 | 2457340  | 2941933  | 0.84  |
| 0.91 | 3531048  | 3763500  | 0.94  |
| 0.99 | 3769182  | 4020897  | 0.94  |
| 0.87 | 9419920  | 6608689  | 1.43  |
| 0.97 | 1.13E+07 | 1.01E+07 | 1.12  |
| 0.98 | 2860619  | 1.05E+07 | 0.27  |
| 0.98 | 2860619  | 1.05E+07 | 0.27  |
| 0.99 | 1.28E+07 | 1.36E+07 | 0.94  |
| 0.98 | 2.07E+07 | 1.60E+07 | 1.29  |
| 0.79 | 1.44E+07 | 1.66E+07 | 0.87  |
| 0.71 | 3.53E+07 | 1.93E+07 | 1.83  |
| 0.99 | 2.29E+07 | 2.61E+07 | 0.88  |
| 0.99 | 2.90E+07 | 2.79E+07 | 1.04  |
| 0.99 | 2.90E+07 | 2.79E+07 | 1.04  |
| 1    | 3.31E+07 | 3.17E+07 | 1.04  |
| 1    | 3.37E+07 | 3.23E+07 | 1.04  |
| 1    | 3.37E+07 | 3.23E+07 | 1.04  |
| 1    | 4.18E+07 | 4.58E+07 | 0.91  |
| 0.99 | 4.39E+07 | 4.90E+07 | 0.90  |
| 1    | 1.29E+08 | 9.78E+07 | 1.32  |
| 1    | 1.05E+08 | 1.00E+08 | 1.05  |
| 1    | 2.29E+08 | 2.79E+08 | 0.82  |
| 0.92 | 5614918  | 5013990  | 1.12  |
| 0.96 | 1481386  | 2156961  | 0.69  |
| 0.97 | 1401105  | 1207192  | 1.16  |
| 0.85 | 2505941  | 1890120  | 1.33  |
| 0.86 | 1.11E+07 | 1.00E+07 | 1.11  |
| 0.97 | 5747387  | 4969959  | 1.16  |
| 1    | 2.43E+07 | 1.99E+07 | 1.22  |
| 1    | 3.19E+07 | 2.84E+07 | 1.12  |
| 1    | 7.62E+07 | 6.71E+07 | 1.14  |
| 0.96 | 1.30E+07 | 1051047  | 12.37 |
| 0.8  | 2053249  | 2547990  | 0.81  |
| 1    | 6876954  | 7566894  | 0.91  |
| 1    | 6876954  | 7566894  | 0.91  |

|      |          |          |      |
|------|----------|----------|------|
| 0.81 | 4987343  | 4279113  | 1.17 |
| 1    | 1.13E+07 | 8928225  | 1.27 |
| 0.99 | 1.18E+07 | 1.02E+07 | 1.16 |
| 1    | 1.29E+07 | 1.11E+07 | 1.16 |
| 0.93 | 735430   | 631944   | 1.16 |
| 0.99 | 7357180  | 8149025  | 0.90 |
| 0.98 | 5928480  | 5741608  | 1.03 |
| 0.98 | 5928480  | 5741608  | 1.03 |
| 1    | 1.19E+07 | 9908890  | 1.20 |
| 0.95 | 1.88E+07 | 1.84E+07 | 1.02 |
| 0.99 | 2.37E+07 | 1.94E+07 | 1.22 |
| 1    | 6.65E+07 | 5.62E+07 | 1.18 |
| 0.98 | 914645   | 832539   | 1.10 |
| 0.98 | 914645   | 832539   | 1.10 |
| 0.88 | 1177999  | 1090954  | 1.08 |
| 0.96 | 1194554  | 1152088  | 1.04 |
| 0.98 | 1858635  | 1471904  | 1.26 |
| 0.99 | 2784338  | 2585341  | 1.08 |
| 0.99 | 1.16E+07 | 9670604  | 1.20 |
| 0.99 | 1.16E+07 | 9670604  | 1.20 |
| 1    | 2.76E+07 | 2.54E+07 | 1.09 |
| 1    | 2.76E+07 | 2.54E+07 | 1.09 |
| 1    | 3.76E+07 | 3.22E+07 | 1.17 |
| 0.98 | 6.67E+07 | 5.92E+07 | 1.13 |
| 0.98 | 7.58E+07 | 6.68E+07 | 1.13 |
| 1    | 1.08E+08 | 9.28E+07 | 1.16 |
| 0.99 | 1214169  | 965741   | 1.26 |
| 0.99 | 1214169  | 965741   | 1.26 |
| 0.9  | 4218505  | 2953017  | 1.43 |
| 0.96 | 1.41E+07 | 1.34E+07 | 1.05 |
| 0.97 | 8190779  | 6962109  | 1.18 |
| 0.99 | 4254762  | 3243990  | 1.31 |
| 0.99 | 1.24E+07 | 1.14E+07 | 1.09 |
| 0.99 | 1.24E+07 | 1.14E+07 | 1.09 |
| 1    | 7209468  | 5396459  | 1.34 |
| 1    | 7209468  | 5396459  | 1.34 |
| 0.97 | 2375013  | 1987206  | 1.20 |
| 0.98 | 1078248  | 1158624  | 0.93 |
| 0.97 | 2779543  | 2315696  | 1.20 |
| 1    | 3703232  | 3777517  | 0.98 |
| 0.93 | 4264732  | 4958757  | 0.86 |
| 0.9  | 1.00E+07 | 8048367  | 1.24 |
| 0.9  | 1.00E+07 | 8048367  | 1.24 |
| 0.99 | 1.05E+07 | 8456553  | 1.24 |
| 0.95 | 1.05E+07 | 1.07E+07 | 0.98 |
| 0.99 | 1.34E+07 | 1.16E+07 | 1.16 |
| 0.93 | 1.86E+07 | 1.98E+07 | 0.94 |
| 0.93 | 1.86E+07 | 1.98E+07 | 0.94 |
| 0.97 | 2.51E+07 | 2.34E+07 | 1.07 |
| 1    | 6.22E+07 | 5.49E+07 | 1.13 |
| 0.99 | 7.99E+07 | 7.19E+07 | 1.11 |

|      |          |          |      |
|------|----------|----------|------|
| 0.99 | 7.99E+07 | 7.19E+07 | 1.11 |
| 0.92 | 1727727  | 1579480  | 1.09 |
| 0.85 | 2734386  | 2601082  | 1.05 |
| 0.97 | 4730890  | 4168454  | 1.13 |
| 0.88 | 2.04E+07 | 7386747  | 2.76 |
| 0.88 | 2.04E+07 | 7386747  | 2.76 |
| 1    | 9970014  | 1.04E+07 | 0.96 |
| 0.99 | 1.59E+07 | 1.45E+07 | 1.10 |
| 0.99 | 2.34E+07 | 2.03E+07 | 1.15 |
| 0.89 | 2.78E+07 | 3.29E+07 | 0.84 |
| 0.87 | 3.65E+07 | 3.71E+07 | 0.98 |
| 0.99 | 5.54E+07 | 5.06E+07 | 1.09 |
| 0.95 | 3497344  | 3532851  | 0.99 |
| 0.98 | 1.04E+07 | 1.04E+07 | 1.00 |
| 0.98 | 6082362  | 4954527  | 1.23 |
| 0.97 | 6475675  | 5135612  | 1.26 |
| 0.98 | 7663415  | 6527042  | 1.17 |
| 0.99 | 1.13E+07 | 9695983  | 1.17 |
| 0.87 | 7309245  | 1.21E+07 | 0.60 |
| 1    | 1.72E+07 | 1.40E+07 | 1.23 |
| 1    | 1.13E+07 | 8369676  | 1.35 |
| 0.98 | 7777687  | 1.02E+09 | 0.01 |
| 1    | 5.03E+07 | 4.69E+07 | 1.07 |
| 0.98 | 2.51E+07 | 2.38E+07 | 1.05 |
| 1    | 5.35E+07 | 5.05E+07 | 1.06 |
| 1    | 1.35E+08 | 1.25E+08 | 1.08 |
| 0.97 | 772002   | 589174   | 1.31 |
| 0.99 | 1891206  | 1622265  | 1.17 |
| 0.99 | 1891206  | 1622265  | 1.17 |
| 0.97 | 1400639  | 1392015  | 1.01 |
| 0.99 | 3097814  | 2753238  | 1.13 |
| 0.6  | 2.04E+07 | 1.64E+08 | 0.12 |
| 0.92 | 1904117  | 1858855  | 1.02 |
| 0.99 | 1489372  | 1987406  | 0.75 |
| 0.92 | 2262433  | 1768766  | 1.28 |
| 0.87 | 2021259  | 2143355  | 0.94 |
| 0.98 | 1.28E+07 | 1.24E+07 | 1.03 |
| 0.98 | 1.28E+07 | 1.24E+07 | 1.03 |
| 0.62 | 1149075  | 605823   | 1.90 |
| 0.95 | 1329050  | 1254919  | 1.06 |
| 0.97 | 1503662  | 1463070  | 1.03 |
| 0.97 | 1503662  | 1463070  | 1.03 |
| 0.81 | 1253263  | 2374160  | 0.53 |
| 1    | 2519263  | 2511862  | 1.00 |
| 0.79 | 2086622  | 3733167  | 0.56 |
| 0.95 | 3803358  | 3884775  | 0.98 |
| 0.77 | 6714540  | 5889165  | 1.14 |
| 0.54 | 1.13E+07 | 8251818  | 1.37 |
| 0.99 | 2219692  | 2133091  | 1.04 |
| 0.8  | 6645439  | 7743064  | 0.86 |
| 0.91 | 1.22E+07 | 2.43E+07 | 0.50 |

|      |          |          |      |
|------|----------|----------|------|
| 0.95 | 6617926  | 6519724  | 1.02 |
| 0.97 | 9165673  | 8081539  | 1.13 |
| 1    | 1.33E+07 | 1.27E+07 | 1.05 |
| 1    | 1.33E+07 | 1.27E+07 | 1.05 |
| 0.94 | 1.44E+07 | 1.43E+07 | 1.01 |
| 1    | 4.46E+07 | 4.54E+07 | 0.98 |
| 1    | 1.09E+08 | 9.49E+07 | 1.15 |
| 1    | 1.09E+08 | 9.49E+07 | 1.15 |
| 1    | 5.40E+08 | 4.53E+08 | 1.19 |
| 1    | 5.58E+08 | 4.69E+08 | 1.19 |
| 0.97 | 1642735  | 727686   | 2.26 |
| 0.98 | 2115099  | 2038613  | 1.04 |
| 0.95 | 1400111  | 1402905  | 1.00 |
| 0.98 | 3843667  | 2965738  | 1.30 |
| 1    | 2.07E+07 | 1.75E+07 | 1.18 |
| 1    | 3.93E+07 | 3.37E+07 | 1.17 |
| 0.94 | 3292977  | 3092476  | 1.06 |
| 0.88 | 1.19E+07 | 1.10E+07 | 1.08 |
| 0.88 | 1756168  | 1826602  | 0.96 |
| 0.96 | 4524658  | 2712162  | 1.67 |
| 0.94 | 1.59E+07 | 1.49E+07 | 1.07 |
| 1    | 7.26E+07 | 6.69E+07 | 1.09 |
| 0.83 | 1.17E+08 | 1.78E+08 | 0.66 |
| 0.83 | 1.17E+08 | 1.78E+08 | 0.66 |
| 0.91 | 2287753  | 2860286  | 0.80 |
| 0.99 | 1033262  | 786709   | 1.31 |
| 0.98 | 3164922  | 2560002  | 1.24 |
| 0.97 | 6517016  | 5105593  | 1.28 |
| 0.06 | 1.73E+07 | 2789629  | 6.20 |
| 0.95 | 6073534  | 2882845  | 2.11 |
| 1    | 9667710  | 7855979  | 1.23 |
| 1    | 9667710  | 7855979  | 1.23 |
| 1    | 1.94E+07 | 1.75E+07 | 1.11 |
| 0.96 | 2.11E+07 | 1.92E+07 | 1.10 |
| 0.99 | 3120696  | 2066220  | 1.51 |
| 0.92 | 2757426  | 2571097  | 1.07 |
| 0.97 | 1.00E+07 | 8912621  | 1.12 |
| 0.99 | 1.60E+07 | 1.17E+07 | 1.37 |
| 1    | 1.51E+07 | 1.34E+07 | 1.13 |
| 0.99 | 1.51E+07 | 1.64E+07 | 0.92 |
| 0.96 | 3.05E+07 | 3.21E+07 | 0.95 |
| 0.73 | 5055264  | 4883258  | 1.04 |
| 0.94 | 5467904  | 4690502  | 1.17 |
| 0.99 | 4.30E+07 | 3.69E+07 | 1.17 |
| 0.94 | 2.08E+07 | 3.12E+07 | 0.67 |
| 0.94 | 2.08E+07 | 3.12E+07 | 0.67 |
| 0.95 | 1988131  | 1726567  | 1.15 |
| 0.97 | 2092065  | 2277356  | 0.92 |
| 0.93 | 2057133  | 1472853  | 1.40 |
| 0.99 | 1994655  | 1731181  | 1.15 |
| 0.99 | 1994655  | 1731181  | 1.15 |

|      |          |          |      |
|------|----------|----------|------|
| 0.97 | 2876595  | 2408749  | 1.19 |
| 0.95 | 4774005  | 3001500  | 1.59 |
| 0.98 | 1366771  | 1163526  | 1.17 |
| 0.98 | 1366771  | 1163526  | 1.17 |
| 0.98 | 1366771  | 1163526  | 1.17 |
| 0.93 | 2138083  | 1937793  | 1.10 |
| 0.98 | 2.28E+07 | 1.58E+07 | 1.44 |
| 0.98 | 2.58E+07 | 1.74E+07 | 1.48 |
| 0.96 | 2164924  | 2203852  | 0.98 |
| 1    | 2.05E+07 | 2.04E+07 | 1.00 |
| 0.94 | 4425032  | 4214742  | 1.05 |
| 0.99 | 3809263  | 3094642  | 1.23 |
| 0.98 | 6470978  | 5779122  | 1.12 |
| 0.98 | 1036482  | 955801   | 1.08 |
| 0.93 | 1461177  | 1488656  | 0.98 |
| 0.89 | 1452232  | 1627216  | 0.89 |
| 0.83 | 2171704  | 2173259  | 1.00 |
| 0.83 | 2171704  | 2173259  | 1.00 |
| 0.99 | 3859066  | 3588384  | 1.08 |
| 0.99 | 5086439  | 4049088  | 1.26 |
| 0.99 | 5263938  | 4906032  | 1.07 |
| 1    | 5952795  | 5526095  | 1.08 |
| 0.71 | 7066513  | 6768445  | 1.04 |
| 0.72 | 9652830  | 9486754  | 1.02 |
| 0.72 | 9652830  | 9486754  | 1.02 |
| 0.97 | 2.28E+07 | 2.24E+07 | 1.02 |
| 0.99 | 2.93E+07 | 2.65E+07 | 1.11 |
| 1    | 1.59E+08 | 1.54E+08 | 1.03 |
| 0.98 | 824690   | 742033   | 1.11 |
| 0.98 | 2029816  | 1971585  | 1.03 |
| 1    | 7634607  | 7214454  | 1.06 |
| 0.96 | 6233501  | 4812931  | 1.30 |
| 0.99 | 1.08E+07 | 9526959  | 1.13 |
| 0.94 | 1796398  | 1120107  | 1.60 |
| 0.98 | 1.09E+07 | 1.06E+07 | 1.03 |
| 0.97 | 1.48E+07 | 1.34E+07 | 1.10 |
| 0.93 | 5555220  | 4870176  | 1.14 |
| 1    | 3.50E+07 | 3.03E+07 | 1.16 |
| 0.98 | 1211934  | 1292783  | 0.94 |
| 0.87 | 2214437  | 1575598  | 1.41 |
| 0.87 | 2214437  | 1575598  | 1.41 |
| 0.97 | 1677854  | 1625044  | 1.03 |
| 0.72 | 3388005  | 2441667  | 1.39 |
| 0.92 | 3532680  | 4698485  | 0.75 |
| 0.99 | 9449298  | 9149161  | 1.03 |
| 0.99 | 1.53E+07 | 1.57E+07 | 0.97 |
| 0.99 | 1.53E+07 | 1.57E+07 | 0.97 |
| 0.98 | 1.88E+07 | 1.69E+07 | 1.11 |
| 0.98 | 1.88E+07 | 1.69E+07 | 1.11 |
| 0.97 | 1.41E+07 | 1.75E+07 | 0.81 |
| 1    | 2.57E+07 | 2.56E+07 | 1.00 |



|      |          |          |       |
|------|----------|----------|-------|
| 1    | 2.57E+07 | 2.56E+07 | 1.00  |
| 0.99 | 3.00E+07 | 2.61E+07 | 1.15  |
| 0.98 | 2.47E+07 | 2.71E+07 | 0.91  |
| 0.99 | 3.58E+07 | 3.66E+07 | 0.98  |
| 1    | 4.16E+07 | 4.25E+07 | 0.98  |
| 0.99 | 5.45E+07 | 5.15E+07 | 1.06  |
| 0.99 | 7.17E+07 | 7.16E+07 | 1.00  |
| 0.99 | 8.91E+07 | 7.75E+07 | 1.15  |
| 0.9  | 8.76E+07 | 1.21E+08 | 0.72  |
| 1    | 1.31E+08 | 1.21E+08 | 1.08  |
| 1    | 1.45E+08 | 1.41E+08 | 1.03  |
| 0.99 | 1728355  | 1706799  | 1.01  |
| 0.92 | 398231   | 393237   | 1.01  |
| 0.95 | 359345   | 524616   | 0.68  |
| 0.92 | 1.37E+07 | 842956   | 16.25 |
| 0.99 | 2416085  | 2540531  | 0.95  |
| 0.99 | 6568231  | 6200701  | 1.06  |
| 0.91 | 5318261  | 5974076  | 0.89  |
| 0.99 | 2.53E+07 | 2.31E+07 | 1.10  |
| 0.99 | 7115513  | 6373908  | 1.12  |
| 0.89 | 9330374  | 6866323  | 1.36  |
| 0.98 | 1992515  | 2042182  | 0.98  |
| 0.98 | 1992515  | 2042182  | 0.98  |
| 0.97 | 3083085  | 2653438  | 1.16  |
| 0.9  | 4697626  | 4263145  | 1.10  |
| 0.9  | 4697626  | 4263145  | 1.10  |
| 0.96 | 9818709  | 8579734  | 1.14  |
| 0.96 | 9818709  | 8579734  | 1.14  |
| 0.99 | 1.32E+07 | 1.30E+07 | 1.02  |
| 0.99 | 1.32E+07 | 1.30E+07 | 1.02  |
| 1    | 2.40E+07 | 1.85E+07 | 1.30  |
| 1    | 3.30E+07 | 2.99E+07 | 1.10  |
| 1    | 8.61E+07 | 7.64E+07 | 1.13  |
| 0.8  | 7405804  | 2313860  | 3.20  |
| 0.98 | 3521560  | 3076910  | 1.14  |
| 0.81 | 1977605  | 758853   | 2.61  |
| 0.91 | 8073436  | 3816296  | 2.12  |
| 0.99 | 7161149  | 6272950  | 1.14  |
| 0.96 | 765284   | 779547   | 0.98  |
| 0.96 | 765284   | 779547   | 0.98  |
| 0.9  | 4700931  | 5365072  | 0.88  |
| 0.94 | 387744   | 446362   | 0.87  |
| 0.73 | 1738448  | 1054422  | 1.65  |
| 0.93 | 1302560  | 1269215  | 1.03  |
| 0.93 | 1302560  | 1269215  | 1.03  |
| 0.99 | 4453106  | 4567699  | 0.97  |
| 0.98 | 6483640  | 6484679  | 1.00  |
| 0.99 | 8294693  | 8355753  | 0.99  |
| 0.99 | 1.06E+07 | 9895048  | 1.07  |
| 0.99 | 1.06E+07 | 9895048  | 1.07  |
| 0.99 | 1.73E+07 | 1.79E+07 | 0.97  |

|      |          |          |      |
|------|----------|----------|------|
| 0.97 | 1631236  | 1301606  | 1.25 |
| 0.89 | 2409811  | 1400290  | 1.72 |
| 0.97 | 3719401  | 2878729  | 1.29 |
| 0.85 | 2769734  | 3969475  | 0.70 |
| 0.98 | 8267787  | 6791601  | 1.22 |
| 0.99 | 9511531  | 7770223  | 1.22 |
| 0.95 | 1.72E+07 | 1.21E+07 | 1.42 |
| 0.96 | 1.94E+07 | 1.40E+07 | 1.39 |
| 0.99 | 2734784  | 2208158  | 1.24 |
| 0.99 | 2.05E+07 | 1.54E+07 | 1.33 |
| 0.99 | 6090078  | 1002270  | 6.08 |
| 0.97 | 8281872  | 6594478  | 1.26 |
| 0.98 | 1.19E+07 | 9960022  | 1.19 |
| 0.95 | 688219   | 504855   | 1.36 |
| 0.98 | 1304539  | 1073248  | 1.22 |
| 0.97 | 9157720  | 8963563  | 1.02 |
| 0.87 | 915148   | 1865115  | 0.49 |
| 0.92 | 2803524  | 2633635  | 1.06 |
| 1    | 5.52E+07 | 5.80E+07 | 0.95 |
| 0.97 | 393809   | 432165   | 0.91 |
| 0.99 | 1738693  | 1696194  | 1.03 |
| 0.96 | 3556210  | 3739024  | 0.95 |
| 0.91 | 6873318  | 1.11E+07 | 0.62 |
| 0.98 | 1.33E+07 | 1.26E+07 | 1.06 |
| 0.99 | 1.44E+07 | 1.38E+07 | 1.04 |
| 0.99 | 1.48E+07 | 1.42E+07 | 1.04 |
| 0.99 | 1.44E+07 | 1.47E+07 | 0.98 |
| 0.99 | 3.04E+07 | 3.07E+07 | 0.99 |
| 1    | 3.32E+07 | 3.24E+07 | 1.02 |
| 0.94 | 3.34E+07 | 3.43E+07 | 0.97 |
| 1    | 6.15E+07 | 6.11E+07 | 1.01 |
| 0.99 | 8.72E+07 | 8.71E+07 | 1.00 |
| 1    | 3.17E+08 | 3.16E+08 | 1.00 |
| 1    | 1.42E+09 | 1.37E+09 | 1.04 |
| 0.53 | 2005431  | 8191999  | 0.24 |
| 0.87 | 1.85E+07 | 1.01E+07 | 1.83 |
| 0.87 | 1.85E+07 | 1.01E+07 | 1.83 |
| 0.96 | 1505760  | 1001770  | 1.50 |
| 0.97 | 1318157  | 1358155  | 0.97 |
| 0.94 | 2497237  | 2082853  | 1.20 |
| 0.97 | 3848864  | 3419473  | 1.13 |
| 0.98 | 1547934  | 1225881  | 1.26 |
| 0.95 | 1968786  | 1627538  | 1.21 |
| 0.98 | 1872417  | 1578194  | 1.19 |
| 0.97 | 4248465  | 3431061  | 1.24 |
| 0.98 | 933702   | 805123   | 1.16 |
| 0.3  | 1889878  | 4686096  | 0.40 |
| 0.92 | 4938967  | 4472025  | 1.10 |
| 0.97 | 5811767  | 5316430  | 1.09 |
| 0.83 | 5223102  | 5803152  | 0.90 |
| 0.97 | 1.45E+07 | 1.24E+07 | 1.17 |

|      |          |          |       |
|------|----------|----------|-------|
| 0.99 | 1.23E+07 | 1.33E+07 | 0.92  |
| 0.98 | 1.41E+07 | 1.38E+07 | 1.02  |
| 0.98 | 1.41E+07 | 1.38E+07 | 1.02  |
| 1    | 1.49E+07 | 1.46E+07 | 1.02  |
| 1    | 1.49E+07 | 1.46E+07 | 1.02  |
| 0.89 | 1.42E+07 | 1.71E+07 | 0.83  |
| 0.98 | 4374938  | 4372554  | 1.00  |
| 0.94 | 6025087  | 4995426  | 1.21  |
| 1    | 2.10E+07 | 1.57E+07 | 1.34  |
| 0.93 | 1219720  | 1335125  | 0.91  |
| 0.92 | 2792609  | 2573802  | 1.09  |
| 0.97 | 5157380  | 6069901  | 0.85  |
| 1    | 1.16E+07 | 1.07E+07 | 1.08  |
| 1    | 1.16E+07 | 1.07E+07 | 1.08  |
| 1    | 1.88E+07 | 1.83E+07 | 1.03  |
| 1    | 4.52E+07 | 4.74E+07 | 0.95  |
| 0.99 | 8.28E+07 | 7.59E+07 | 1.09  |
| 1    | 1.07E+08 | 9.16E+07 | 1.17  |
| 0.95 | 3757482  | 1572146  | 2.39  |
| 0.99 | 2106580  | 2086539  | 1.01  |
| 0.96 | 5005361  | 4241925  | 1.18  |
| 0.99 | 2535129  | 2300814  | 1.10  |
| 0.99 | 2535129  | 2300814  | 1.10  |
| 1    | 3990594  | 3415374  | 1.17  |
| 0.99 | 4355368  | 3643054  | 1.20  |
| 0.99 | 4355368  | 3643054  | 1.20  |
| 0.99 | 4355368  | 3643054  | 1.20  |
| 0.94 | 4478301  | 4738565  | 0.95  |
| 0.9  | 7712288  | 7928255  | 0.97  |
| 0.99 | 1415690  | 1394106  | 1.02  |
| 0.92 | 2067555  | 1122244  | 1.84  |
| 0.94 | 1555623  | 1477852  | 1.05  |
| 1    | 6903948  | 6934465  | 1.00  |
| 1    | 6903948  | 6934465  | 1.00  |
| 0.91 | 2760771  | 2592702  | 1.06  |
| 0.91 | 2760771  | 2592702  | 1.06  |
| 0.95 | 7759594  | 7175482  | 1.08  |
| 0.99 | 7767669  | 7491251  | 1.04  |
| 1    | 6.50E+07 | 5.99E+07 | 1.09  |
| 0.96 | 2105191  | 1670558  | 1.26  |
| 0.89 | 2906200  | 2228041  | 1.30  |
| 1    | 5482697  | 5327558  | 1.03  |
| 0.96 | 4.66E+07 | 1739220  | 26.79 |
| 0.93 | 1215817  | 825980   | 1.47  |
| 0.99 | 9437876  | 8098241  | 1.17  |
| 0.99 | 3.62E+07 | 3.28E+07 | 1.10  |
| 0.97 | 132814   | 134908   | 0.98  |
| 0.98 | 1457266  | 1099915  | 1.32  |
| 0.98 | 1503893  | 1304576  | 1.15  |
| 0.86 | 4346527  | 3629604  | 1.20  |
| 0.73 | 1.32E+07 | 1.29E+07 | 1.02  |

|      |          |          |       |
|------|----------|----------|-------|
| 0.94 | 1.19E+07 | 1.32E+07 | 0.90  |
| 0.76 | 7978559  | 170086   | 46.91 |
| 0.99 | 7049483  | 5705878  | 1.24  |
| 0.99 | 7049483  | 5705878  | 1.24  |
| 0.99 | 7895310  | 6773228  | 1.17  |
| 0.92 | 1.16E+07 | 1.05E+07 | 1.10  |
| 0.98 | 1146426  | 1216335  | 0.94  |
| 0.95 | 5561970  | 5756645  | 0.97  |
| 0.98 | 643833   | 670625   | 0.96  |
| 0.95 | 7540591  | 6127664  | 1.23  |
| 0.88 | 5476000  | 8010168  | 0.68  |
| 0.92 | 1790658  | 2164367  | 0.83  |
| 0.92 | 1790658  | 2164367  | 0.83  |
| 0.88 | 2475303  | 2594835  | 0.95  |
| 0.88 | 2475303  | 2594835  | 0.95  |
| 0.81 | 4480004  | 3515646  | 1.27  |
| 0.96 | 4308840  | 4773950  | 0.90  |
| 0.96 | 8248814  | 8115154  | 1.02  |
| 1    | 3.22E+07 | 2.80E+07 | 1.15  |
| 1    | 4.36E+07 | 4.09E+07 | 1.07  |
| 0.92 | 1817053  | 1562283  | 1.16  |
| 0.97 | 1802614  | 1980329  | 0.91  |
| 0.97 | 1802614  | 1980329  | 0.91  |
| 0.99 | 7489267  | 6214492  | 1.21  |
| 0.99 | 7489267  | 6214492  | 1.21  |
| 0.97 | 2916070  | 2548576  | 1.14  |
| 0.99 | 6857301  | 6232287  | 1.10  |
| 0.99 | 1633450  | 1526987  | 1.07  |
| 0.98 | 1255667  | 1212364  | 1.04  |
| 0.98 | 1255667  | 1212364  | 1.04  |
| 0.8  | 3.12E+07 | 9578436  | 3.26  |
| 0.96 | 699008   | 631649   | 1.11  |
| 0.97 | 831531   | 811403   | 1.02  |
| 0.99 | 6300614  | 5719926  | 1.10  |
| 0.96 | 1803351  | 1560793  | 1.16  |
| 0.98 | 6691459  | 5240976  | 1.28  |
| 0.99 | 9525381  | 7780094  | 1.22  |
| 0.98 | 2.81E+07 | 2.30E+07 | 1.22  |
| 0.97 | 1857947  | 1976426  | 0.94  |
| 0.99 | 2500631  | 3571762  | 0.70  |
| 0.97 | 5148003  | 7299484  | 0.71  |
| 1    | 5.71E+07 | 7.03E+07 | 0.81  |
| 0.98 | 3134387  | 3401379  | 0.92  |
| 0.83 | 2989036  | 4144351  | 0.72  |
| 1    | 1.31E+07 | 1.23E+07 | 1.07  |
| 0.97 | 1.15E+07 | 1.28E+07 | 0.90  |
| 0.97 | 1.15E+07 | 1.28E+07 | 0.90  |
| 0.93 | 1.05E+07 | 1.29E+07 | 0.81  |
| 0.88 | 1.42E+07 | 1.83E+07 | 0.78  |
| 0.9  | 2.11E+07 | 2.40E+07 | 0.88  |
| 0.33 | 8115486  | 2.85E+07 | 0.28  |

|      |          |          |      |
|------|----------|----------|------|
| 0.9  | 9.58E+07 | 1.09E+08 | 0.88 |
| 1    | 3.49E+08 | 3.61E+08 | 0.97 |
| 1    | 1274108  | 1048633  | 1.22 |
| 1    | 1274108  | 1048633  | 1.22 |
| 0.96 | 1143071  | 1197911  | 0.95 |
| 1    | 2539649  | 2497712  | 1.02 |
| 1    | 3653812  | 3132340  | 1.17 |
| 1    | 1.24E+07 | 1.04E+07 | 1.19 |
| 0.99 | 5.13E+07 | 4.98E+07 | 1.03 |
| 0.96 | 1.06E+07 | 1.02E+07 | 1.04 |
| 0.98 | 2549887  | 2520986  | 1.01 |
| 0.97 | 4379283  | 4283307  | 1.02 |
| 0.95 | 4712580  | 4458126  | 1.06 |
| 0.89 | 5995537  | 5933374  | 1.01 |
| 0.98 | 1078187  | 996753   | 1.08 |
| 0.99 | 1439670  | 1377624  | 1.05 |
| 0.95 | 1562434  | 1626862  | 0.96 |
| 0.98 | 1974240  | 1855899  | 1.06 |
| 0.97 | 4027367  | 4134878  | 0.97 |
| 0.98 | 7357178  | 7014374  | 1.05 |
| 0.98 | 7357178  | 7014374  | 1.05 |
| 1    | 7568473  | 7219749  | 1.05 |
| 1    | 1.50E+07 | 1.40E+07 | 1.07 |
| 1    | 2.33E+07 | 2.07E+07 | 1.13 |
| 1    | 3.17E+07 | 2.94E+07 | 1.08 |
| 1    | 3.58E+07 | 3.38E+07 | 1.06 |
| 1    | 5.96E+07 | 5.37E+07 | 1.11 |
| 1    | 8.61E+08 | 7.60E+08 | 1.13 |
| 0.98 | 2221607  | 2352187  | 0.94 |
| 0.76 | 4775805  | 4360535  | 1.10 |
| 0.9  | 7196724  | 4824916  | 1.49 |
| 0.99 | 1.97E+07 | 1.57E+07 | 1.25 |
| 1    | 3.22E+07 | 2.80E+07 | 1.15 |
| 0.95 | 2916280  | 2675737  | 1.09 |
| 0.96 | 3899517  | 3671539  | 1.06 |
| 0.8  | 3816825  | 6052310  | 0.63 |
| 0.89 | 1107169  | 1010554  | 1.10 |
| 0.97 | 1980547  | 1422690  | 1.39 |
| 1    | 3256478  | 3144580  | 1.04 |
| 0.98 | 1193033  | 921928   | 1.29 |
| 0.98 | 1193033  | 921928   | 1.29 |
| 0.81 | 1.90E+07 | 1.45E+07 | 1.31 |
| 0.78 | 2.73E+07 | 1.69E+07 | 1.62 |
| 0.98 | 960605   | 900611   | 1.07 |
| 0.95 | 2439062  | 2712123  | 0.90 |
| 0.98 | 1110589  | 947222   | 1.17 |
| 0.92 | 2080244  | 1956564  | 1.06 |
| 0.99 | 3513494  | 3102381  | 1.13 |
| 0.99 | 5294981  | 4353070  | 1.22 |
| 0.94 | 5658028  | 5394346  | 1.05 |
| 0.94 | 1.22E+07 | 1.23E+07 | 0.99 |

|      |          |          |      |
|------|----------|----------|------|
| 0.97 | 2178728  | 1467592  | 1.48 |
| 1    | 9801145  | 8703489  | 1.13 |
| 0.95 | 1.17E+07 | 1.13E+07 | 1.04 |
| 0.74 | 4549370  | 4379836  | 1.04 |
| 0.85 | 8747204  | 7585511  | 1.15 |
| 0.97 | 4786791  | 3847999  | 1.24 |
| 0.98 | 5235906  | 5384552  | 0.97 |
| 0.88 | 1.20E+07 | 1.15E+07 | 1.04 |
| 0.99 | 1.38E+07 | 1.31E+07 | 1.05 |
| 0.84 | 2455243  | 1675417  | 1.47 |
| 0.97 | 1123431  | 1353844  | 0.83 |
| 0.92 | 1297426  | 1503866  | 0.86 |
| 0.98 | 2060432  | 2005514  | 1.03 |
| 0.94 | 5301149  | 4916621  | 1.08 |
| 0.85 | 5428355  | 5460051  | 0.99 |
| 0.99 | 2.53E+07 | 2.41E+07 | 1.05 |
| 0.97 | 1137325  | 1143787  | 0.99 |
| 0.94 | 2250595  | 2487664  | 0.90 |
| 0.99 | 2506455  | 2705640  | 0.93 |
| 0.98 | 6834792  | 7508415  | 0.91 |
| 0.94 | 9457387  | 8869658  | 1.07 |
| 0.98 | 1.06E+07 | 1.51E+07 | 0.70 |
| 0.94 | 1.72E+07 | 1.67E+07 | 1.03 |
| 1    | 2.89E+07 | 2.96E+07 | 0.98 |
| 0.98 | 4.88E+07 | 4.47E+07 | 1.09 |
| 0.79 | 2413459  | 2728114  | 0.88 |
| 1    | 1.43E+07 | 1.31E+07 | 1.09 |
| 0.98 | 1.71E+07 | 1.88E+07 | 0.91 |
| 0.81 | 823139   | 873282   | 0.94 |
| 0.96 | 1569956  | 1287471  | 1.22 |
| 0.96 | 1569956  | 1287471  | 1.22 |
| 0.97 | 4058271  | 3706302  | 1.09 |
| 1    | 4373029  | 3916237  | 1.12 |
| 0.99 | 5860618  | 5188982  | 1.13 |
| 0.96 | 1680798  | 1439927  | 1.17 |
| 0.99 | 9489921  | 7641116  | 1.24 |
| 0.72 | 2228752  | 1.19E+07 | 0.19 |
| 0.99 | 9328971  | 7991936  | 1.17 |
| 0.99 | 2.22E+07 | 1.96E+07 | 1.13 |
| 0.98 | 1.49E+07 | 1.31E+07 | 1.14 |
| 0.98 | 1.49E+07 | 1.31E+07 | 1.14 |
| 0.92 | 1.42E+07 | 1.41E+07 | 1.01 |
| 0.98 | 296093   | 190208   | 1.56 |
| 0.97 | 518311   | 574235   | 0.90 |
| 0.9  | 303495   | 361593   | 0.84 |
| 0.93 | 5078549  | 4819354  | 1.05 |
| 0.92 | 1.61E+07 | 1.15E+07 | 1.40 |
| 0.77 | 2.13E+07 | 1.27E+07 | 1.68 |
| 0.93 | 7552828  | 5534178  | 1.36 |
| 0.93 | 1073549  | 1118672  | 0.96 |
| 0.98 | 1465227  | 1396702  | 1.05 |

|      |          |          |      |
|------|----------|----------|------|
| 0.94 | 1.21E+07 | 1.30E+07 | 0.93 |
| 0.98 | 4.27E+07 | 4.23E+07 | 1.01 |
| 0.98 | 5650527  | 7213317  | 0.78 |
| 0.97 | 776853   | 901533   | 0.86 |
| 0.97 | 8709524  | 7143795  | 1.22 |
| 0.97 | 8709524  | 7143795  | 1.22 |
| 0.93 | 503003   | 502849   | 1.00 |
| 0.97 | 750468   | 787861   | 0.95 |
| 0.96 | 2699373  | 2005897  | 1.35 |
| 0.98 | 2485819  | 2202993  | 1.13 |
| 1    | 6088125  | 5115423  | 1.19 |
| 0.97 | 4029878  | 2452151  | 1.64 |
| 0.97 | 4029878  | 2452151  | 1.64 |
| 0.92 | 5139585  | 3857098  | 1.33 |
| 1    | 7215976  | 6061688  | 1.19 |
| 0.82 | 3877516  | 2548695  | 1.52 |
| 0.87 | 5148333  | 6586942  | 0.78 |
| 0.99 | 5699614  | 5453875  | 1.05 |
| 0.98 | 6960983  | 5610563  | 1.24 |
| 0.92 | 9134876  | 7936278  | 1.15 |
| 0.92 | 9134876  | 7936278  | 1.15 |
| 0.76 | 1647237  | 2133434  | 0.77 |
| 0.91 | 1.25E+07 | 8861634  | 1.41 |
| 0.94 | 1.30E+07 | 2.06E+07 | 0.63 |
| 0.94 | 3687052  | 3294874  | 1.12 |
| 0.98 | 2518744  | 2537320  | 0.99 |
| 0.98 | 2518744  | 2537320  | 0.99 |
| 1    | 3308650  | 3549288  | 0.93 |
| 0.77 | 6883079  | 5941712  | 1.16 |
| 0.95 | 8333495  | 8239946  | 1.01 |
| 0.97 | 1.11E+07 | 1.08E+07 | 1.03 |
| 1    | 1.07E+07 | 1.16E+07 | 0.92 |
| 0.96 | 3.30E+07 | 3.45E+07 | 0.96 |
| 1    | 2.88E+07 | 2.88E+07 | 1.00 |
| 0.97 | 1619100  | 1062978  | 1.52 |
| 0.97 | 1769549  | 1610698  | 1.10 |
| 0.99 | 2235328  | 2436979  | 0.92 |
| 0.98 | 2759281  | 2638788  | 1.05 |
| 0.98 | 9418758  | 1.17E+07 | 0.81 |
| 0.98 | 8025520  | 7687209  | 1.04 |
| 0.77 | 1.04E+07 | 8590917  | 1.21 |
| 0.77 | 1.04E+07 | 8590917  | 1.21 |
| 0.94 | 3.12E+07 | 3.75E+07 | 0.83 |
| 0.94 | 3.12E+07 | 3.75E+07 | 0.83 |
| 0.93 | 1407904  | 1458090  | 0.97 |
| 0.97 | 1338639  | 960643   | 1.39 |
| 0.97 | 1413291  | 1126955  | 1.25 |
| 0.98 | 2301188  | 1664895  | 1.38 |
| 0.98 | 3082139  | 2103594  | 1.47 |
| 1    | 7439787  | 5100528  | 1.46 |
| 0.99 | 1939853  | 1369781  | 1.42 |

|      |          |          |      |
|------|----------|----------|------|
| 0.99 | 8274589  | 6456657  | 1.28 |
| 0.98 | 1769787  | 2114250  | 0.84 |
| 1    | 2514667  | 2427022  | 1.04 |
| 0.87 | 3082271  | 4280439  | 0.72 |
| 0.98 | 2765514  | 2465737  | 1.12 |
| 0.91 | 2565655  | 3145231  | 0.82 |
| 0.99 | 2.05E+07 | 1.74E+07 | 1.18 |
| 0.99 | 2.05E+07 | 1.74E+07 | 1.18 |
| 0.99 | 2.95E+07 | 3.18E+07 | 0.93 |
| 0.12 | 6361615  | 1.86E+08 | 0.03 |
| 0.53 | 3572088  | 3021525  | 1.18 |
| 0.99 | 5.59E+07 | 5.00E+07 | 1.12 |
| 0.99 | 2576373  | 2765730  | 0.93 |
| 0.97 | 2920847  | 3360007  | 0.87 |
| 0.98 | 5296834  | 5145574  | 1.03 |
| 0.8  | 2252557  | 1747364  | 1.29 |
| 0.84 | 1206158  | 1669285  | 0.72 |
| 0.98 | 1716042  | 1748536  | 0.98 |
| 0.92 | 2392121  | 2787944  | 0.86 |
| 0.99 | 5411058  | 6461978  | 0.84 |
| 0.97 | 8272804  | 7643997  | 1.08 |
| 0.98 | 1.26E+07 | 1.19E+07 | 1.06 |
| 0.99 | 2.75E+07 | 2.25E+07 | 1.22 |
| 1    | 3.19E+07 | 3.18E+07 | 1.00 |
| 0.98 | 2438081  | 2423249  | 1.01 |
| 0.96 | 2115874  | 1986736  | 1.07 |
| 0.98 | 6586823  | 6555829  | 1.00 |
| 0.94 | 1.08E+07 | 9580934  | 1.13 |
| 0.94 | 1.08E+07 | 9580934  | 1.13 |
| 0.94 | 1.08E+07 | 9580934  | 1.13 |
| 0.96 | 939502   | 848174   | 1.11 |
| 0.99 | 2739482  | 2731735  | 1.00 |
| 0.85 | 3536369  | 3702260  | 0.96 |
| 0.98 | 5166931  | 5042219  | 1.02 |
| 0.95 | 1.55E+07 | 1.57E+07 | 0.99 |
| 0.97 | 2.52E+07 | 2.39E+07 | 1.05 |
| 0.21 | 5739393  | 3977269  | 1.44 |
| 0.97 | 8539907  | 6803017  | 1.26 |
| 0.99 | 1.20E+07 | 1.01E+07 | 1.19 |
| 0.99 | 4299602  | 3438740  | 1.25 |
| 0.99 | 8668282  | 7639570  | 1.13 |
| 0.91 | 6582610  | 6953054  | 0.95 |
| 0.91 | 6582610  | 6953054  | 0.95 |
| 0.96 | 754483   | 867931   | 0.87 |
| 0.97 | 8146922  | 8113963  | 1.00 |
| 1    | 3.36E+07 | 3.01E+07 | 1.12 |
| 1    | 3.68E+07 | 3.30E+07 | 1.12 |
| 1    | 3.68E+07 | 3.30E+07 | 1.12 |
| 0.91 | 2537147  | 2069387  | 1.23 |
| 0.79 | 3461450  | 4207614  | 0.82 |
| 0.99 | 5338252  | 5664864  | 0.94 |



|      |          |          |      |
|------|----------|----------|------|
| 0.97 | 6596705  | 7297037  | 0.90 |
| 0.98 | 2.65E+07 | 2.18E+07 | 1.22 |
| 0.98 | 2.65E+07 | 2.18E+07 | 1.22 |
| 0.84 | 1005328  | 1.44E+07 | 0.07 |
| 0.98 | 2715741  | 2257782  | 1.20 |
| 0.83 | 7955600  | 6624443  | 1.20 |
| 0.52 | 7440373  | 2.02E+07 | 0.37 |
| 0.88 | 2.12E+07 | 2.03E+07 | 1.04 |
| 0.83 | 1276063  | 779651   | 1.64 |
| 0.95 | 3880075  | 2573203  | 1.51 |
| 0.95 | 4415440  | 4031680  | 1.10 |
| 0.98 | 1838580  | 1507705  | 1.22 |
| 0.98 | 1838580  | 1507705  | 1.22 |
| 0.98 | 2736497  | 2495400  | 1.10 |
| 0.99 | 5.13E+07 | 4.98E+07 | 1.03 |
| 0.98 | 1502767  | 1313771  | 1.14 |
| 0.98 | 1502767  | 1313771  | 1.14 |
| 0.85 | 2277659  | 1911049  | 1.19 |
| 0.76 | 3272067  | 2166464  | 1.51 |
| 1    | 3586857  | 3574419  | 1.00 |
| 1    | 1.48E+07 | 1.31E+07 | 1.13 |
| 0.96 | 3037717  | 2453052  | 1.24 |
| 0.94 | 3627860  | 4337154  | 0.84 |
| 0.98 | 9426114  | 8070510  | 1.17 |
| 0.98 | 9426114  | 8070510  | 1.17 |
| 1    | 2.81E+07 | 2.48E+07 | 1.13 |
| 1    | 3.07E+07 | 2.60E+07 | 1.18 |
| 0.98 | 8052003  | 6514602  | 1.24 |
| 0.9  | 2702542  | 2134680  | 1.27 |
| 0.99 | 1846672  | 1424953  | 1.30 |
| 0.99 | 1846672  | 1424953  | 1.30 |
| 0.85 | 1.19E+07 | 1.50E+07 | 0.79 |
| 0.8  | 1480076  | 1951257  | 0.76 |
| 0.8  | 2053249  | 2547990  | 0.81 |
| 0.78 | 1716308  | 1470651  | 1.17 |
| 0.89 | 531085   | 535528   | 0.99 |
| 0.73 | 3227296  | 2661202  | 1.21 |
| 0.97 | 3036793  | 3614186  | 0.84 |
| 0.99 | 4917830  | 4467177  | 1.10 |
| 0.95 | 4499297  | 4549931  | 0.99 |
| 0.99 | 1.39E+07 | 1.11E+07 | 1.25 |
| 0.96 | 2.44E+07 | 1.46E+07 | 1.67 |
| 0.98 | 1.98E+07 | 1.83E+07 | 1.08 |
| 0.35 | 3.05E+07 | 2.63E+07 | 1.16 |
| 1    | 1.19E+08 | 1.05E+08 | 1.13 |
| 0.91 | 2524913  | 2393486  | 1.05 |
| 0.95 | 3780658  | 3151738  | 1.20 |
| 0.97 | 9058287  | 1.28E+07 | 0.71 |
| 0.97 | 4664110  | 3831596  | 1.22 |
| 0.93 | 1.02E+07 | 1.95E+07 | 0.52 |
| 0.97 | 1.38E+07 | 1.27E+07 | 1.09 |

|      |          |          |      |
|------|----------|----------|------|
| 0.97 | 1.38E+07 | 1.27E+07 | 1.09 |
| 0.97 | 5052062  | 4193019  | 1.20 |
| 0.98 | 467052   | 559337   | 0.84 |
| 0.97 | 1.42E+07 | 1.41E+07 | 1.01 |
| 0.98 | 3603149  | 3188990  | 1.13 |
| 0.17 | 2269975  | 7479919  | 0.30 |
| 0.98 | 2.06E+07 | 2.16E+07 | 0.95 |
| 0.98 | 2.06E+07 | 2.16E+07 | 0.95 |
| 0.98 | 2.06E+07 | 2.16E+07 | 0.95 |
| 0.88 | 8466710  | 4648887  | 1.82 |
| 0.26 | 3174479  | 973143   | 3.26 |
| 0.91 | 3946719  | 3875736  | 1.02 |
| 0.96 | 4991437  | 3960558  | 1.26 |
| 0.96 | 5201424  | 4647053  | 1.12 |
| 1    | 1260358  | 1086623  | 1.16 |
| 0.99 | 1667781  | 1819639  | 0.92 |
| 0.98 | 2679221  | 2446144  | 1.10 |
| 0.99 | 3166250  | 2910128  | 1.09 |
| 0.99 | 4956824  | 4430489  | 1.12 |
| 0.99 | 4712875  | 4570958  | 1.03 |
| 1    | 1.17E+07 | 1.10E+07 | 1.06 |
| 1    | 2.87E+07 | 2.55E+07 | 1.13 |
| 1    | 3.93E+07 | 3.27E+07 | 1.20 |
| 0.97 | 3040843  | 2805743  | 1.08 |
| 0.97 | 3040843  | 2805743  | 1.08 |
| 0.99 | 4436456  | 4084854  | 1.09 |
| 0.93 | 6693499  | 5598226  | 1.20 |
| 0.93 | 6693499  | 5598226  | 1.20 |
| 1    | 1.76E+07 | 1.54E+07 | 1.14 |
| 1    | 4.85E+07 | 4.36E+07 | 1.11 |
| 0.98 | 1692300  | 1496682  | 1.13 |
| 1    | 2860227  | 2621371  | 1.09 |
| 0.98 | 4288680  | 4144895  | 1.03 |
| 0.97 | 4873503  | 5475201  | 0.89 |
| 0.96 | 8451760  | 7938423  | 1.06 |
| 0.96 | 8451760  | 7938423  | 1.06 |
| 1    | 9223284  | 9216811  | 1.00 |
| 0.99 | 1.14E+07 | 1.08E+07 | 1.06 |
| 0.99 | 1.14E+07 | 1.08E+07 | 1.06 |
| 0.95 | 1.45E+07 | 1.35E+07 | 1.07 |
| 1    | 1.66E+07 | 1.69E+07 | 0.98 |
| 0.99 | 1.72E+07 | 1.78E+07 | 0.97 |
| 0.99 | 1.72E+07 | 1.78E+07 | 0.97 |
| 0.98 | 2.53E+07 | 2.67E+07 | 0.95 |
| 0.93 | 1884121  | 1774963  | 1.06 |
| 0.97 | 3805796  | 2747085  | 1.39 |
| 0.97 | 3805796  | 2747085  | 1.39 |
| 0.96 | 8087750  | 8850222  | 0.91 |
| 0.91 | 5719196  | 4577580  | 1.25 |
| 0.91 | 5719196  | 4577580  | 1.25 |
| 0.94 | 1.11E+07 | 9479483  | 1.17 |

|      |          |          |      |
|------|----------|----------|------|
| 0.94 | 1.11E+07 | 9479483  | 1.17 |
| 1    | 1.60E+07 | 1.39E+07 | 1.15 |
| 1    | 1.60E+07 | 1.39E+07 | 1.15 |
| 0.93 | 1.16E+07 | 9251670  | 1.25 |
| 0.83 | 2.39E+07 | 2.82E+07 | 0.85 |
| 0.98 | 1.10E+08 | 9.48E+07 | 1.16 |
| 0.97 | 1.26E+08 | 1.21E+08 | 1.04 |
| 0.94 | 4409472  | 3553864  | 1.24 |
| 0.89 | 1.06E+07 | 9360536  | 1.13 |
| 0.96 | 1.14E+07 | 1.04E+07 | 1.10 |
| 0.96 | 1.14E+07 | 1.04E+07 | 1.10 |
| 0.94 | 4082799  | 3622565  | 1.13 |
| 0.83 | 3016356  | 1940399  | 1.55 |
| 0.96 | 3528653  | 3440852  | 1.03 |
| 0.99 | 1.58E+07 | 1.55E+07 | 1.02 |
| 0.99 | 1904990  | 1842720  | 1.03 |
| 0.99 | 2316962  | 1991537  | 1.16 |
| 0.93 | 4715895  | 5790056  | 0.81 |
| 0.93 | 4715895  | 5790056  | 0.81 |
| 0.98 | 847027   | 825916   | 1.03 |
| 0.97 | 3065153  | 3326880  | 0.92 |
| 0.97 | 3065153  | 3326880  | 0.92 |
| 0.96 | 1422410  | 1150463  | 1.24 |
| 0.99 | 2920048  | 2244273  | 1.30 |
| 1    | 4949418  | 4283007  | 1.16 |
| 1    | 6522384  | 5692112  | 1.15 |
| 1    | 1.15E+07 | 9268086  | 1.24 |
| 1    | 1.15E+07 | 9483212  | 1.21 |
| 1    | 1.56E+07 | 1.32E+07 | 1.18 |
| 1    | 5.39E+07 | 4.92E+07 | 1.10 |
| 1    | 2.30E+08 | 1.85E+08 | 1.24 |
| 0.99 | 2556429  | 2513513  | 1.02 |
| 0.91 | 4356443  | 3380751  | 1.29 |
| 0.94 | 6001656  | 6431457  | 0.93 |
| 0.94 | 6001656  | 6431457  | 0.93 |
| 0.98 | 1.09E+07 | 1.06E+07 | 1.03 |
| 0.99 | 2.59E+07 | 2.21E+07 | 1.17 |
| 1    | 2.16E+08 | 2.17E+08 | 1.00 |
| 0.94 | 1042654  | 1139466  | 0.92 |
| 0.95 | 2192792  | 2028202  | 1.08 |
| 0.96 | 4795724  | 4217848  | 1.14 |
| 0.99 | 7214990  | 5951757  | 1.21 |
| 0.98 | 7426034  | 8029113  | 0.92 |
| 0.98 | 7426034  | 8029113  | 0.92 |
| 0.94 | 9453882  | 8150427  | 1.16 |
| 0.94 | 1.31E+07 | 1.29E+07 | 1.02 |
| 0.95 | 2.16E+07 | 2.04E+07 | 1.06 |
| 0.95 | 2.16E+07 | 2.04E+07 | 1.06 |
| 0.97 | 2.92E+07 | 2.90E+07 | 1.01 |
| 0.99 | 3.44E+07 | 3.06E+07 | 1.12 |
| 0.9  | 4.04E+07 | 4.11E+07 | 0.98 |

|      |          |          |      |
|------|----------|----------|------|
| 1    | 1.20E+08 | 1.13E+08 | 1.06 |
| 1    | 2.03E+08 | 1.92E+08 | 1.06 |
| 0.89 | 3435446  | 4271977  | 0.80 |
| 0.99 | 7015681  | 6742513  | 1.04 |
| 1    | 2.51E+07 | 2.51E+07 | 1.00 |
| 0.97 | 975539   | 873534   | 1.12 |
| 1    | 1665740  | 1503439  | 1.11 |
| 1    | 1665740  | 1503439  | 1.11 |
| 1    | 5.18E+07 | 4.70E+07 | 1.10 |
| 1    | 5.18E+07 | 4.70E+07 | 1.10 |
| 0.99 | 5.20E+07 | 4.87E+07 | 1.07 |
| 0.99 | 5.20E+07 | 4.87E+07 | 1.07 |
| 0.98 | 1283585  | 1122668  | 1.14 |
| 0.95 | 1270085  | 1132108  | 1.12 |
| 0.94 | 3457074  | 2734449  | 1.26 |
| 1    | 5.33E+07 | 4.65E+07 | 1.15 |
| 0.99 | 2.56E+07 | 2.47E+07 | 1.04 |
| 0.79 | 6204192  | 6385226  | 0.97 |
| 0.96 | 1894372  | 1767346  | 1.07 |
| 0.99 | 1.55E+07 | 1.57E+07 | 0.99 |
| 0.97 | 1.71E+07 | 1.80E+07 | 0.95 |
| 0.74 | 1902296  | 1505226  | 1.26 |
| 0.98 | 6000840  | 5765783  | 1.04 |
| 0.98 | 6000840  | 5765783  | 1.04 |
| 0.97 | 9678034  | 6822378  | 1.42 |
| 0.98 | 3160512  | 3182652  | 0.99 |
| 0.87 | 1321311  | 984249   | 1.34 |
| 0.94 | 1194876  | 1138446  | 1.05 |
| 0.95 | 2856749  | 2216747  | 1.29 |
| 1    | 8937984  | 7992374  | 1.12 |
| 0.99 | 1.04E+07 | 9201950  | 1.13 |
| 0.99 | 1.04E+07 | 9201950  | 1.13 |
| 0.98 | 2.63E+07 | 2.58E+07 | 1.02 |
| 0.84 | 2.90E+07 | 3.66E+07 | 0.79 |
| 0.98 | 1435243  | 1330901  | 1.08 |
| 0.98 | 1435243  | 1330901  | 1.08 |
| 0.99 | 3709656  | 2639519  | 1.41 |
| 0.94 | 1130698  | 1443280  | 0.78 |
| 0.99 | 2317657  | 1762326  | 1.32 |
| 0.99 | 2317657  | 1762326  | 1.32 |
| 0.99 | 2226359  | 1971883  | 1.13 |
| 0.99 | 4230363  | 3607230  | 1.17 |
| 0.99 | 7720717  | 6943327  | 1.11 |
| 0.99 | 7952486  | 7014210  | 1.13 |
| 0.97 | 2951289  | 5643415  | 0.52 |
| 0.98 | 498535   | 504490   | 0.99 |
| 0.9  | 1316122  | 755536   | 1.74 |
| 0.97 | 1482316  | 1416026  | 1.05 |
| 0.92 | 1466080  | 1484598  | 0.99 |
| 0.99 | 1396836  | 1500208  | 0.93 |
| 0.96 | 1718673  | 1647654  | 1.04 |

|      |          |          |      |
|------|----------|----------|------|
| 0.96 | 2564423  | 2699157  | 0.95 |
| 0.98 | 3797552  | 3729642  | 1.02 |
| 0.95 | 2047950  | 7688232  | 0.27 |
| 0.93 | 7915172  | 7833901  | 1.01 |
| 0.99 | 1.95E+07 | 2.01E+07 | 0.97 |
| 0.99 | 1.95E+07 | 2.01E+07 | 0.97 |
| 1    | 7.98E+07 | 7.66E+07 | 1.04 |
| 0.99 | 4.37E+07 | 3.78E+07 | 1.16 |
| 0.99 | 4.37E+07 | 3.78E+07 | 1.16 |
| 0.99 | 4.37E+07 | 3.78E+07 | 1.16 |
| 0.97 | 5.22E+07 | 4.74E+07 | 1.10 |
| 0.98 | 1170277  | 1108550  | 1.06 |
| 0.9  | 1205680  | 1256340  | 0.96 |
| 0.98 | 3528526  | 3925012  | 0.90 |
| 1    | 6893245  | 5357381  | 1.29 |
| 1    | 6893245  | 5357381  | 1.29 |
| 0.92 | 7137674  | 5621293  | 1.27 |
| 0.95 | 6808861  | 6615716  | 1.03 |
| 1    | 7466614  | 7131129  | 1.05 |
| 0.95 | 1.53E+07 | 1.68E+07 | 0.91 |
| 0.99 | 1.99E+07 | 1.81E+07 | 1.10 |
| 0.87 | 2.88E+07 | 3.42E+07 | 0.84 |
| 1    | 4.97E+07 | 4.10E+07 | 1.21 |
| 1    | 4.97E+07 | 4.10E+07 | 1.21 |
| 1    | 5.05E+07 | 4.45E+07 | 1.13 |
| 1    | 5.33E+07 | 4.63E+07 | 1.15 |
| 1    | 1.39E+08 | 1.36E+08 | 1.02 |
| 1    | 1.84E+08 | 1.72E+08 | 1.07 |
| 0.91 | 1617936  | 1238307  | 1.31 |
| 0.99 | 5534532  | 5672769  | 0.98 |
| 0.99 | 1.82E+07 | 1.54E+07 | 1.18 |
| 0.97 | 1546886  | 1422088  | 1.09 |
| 0.99 | 5249558  | 4800414  | 1.09 |
| 0.99 | 5249558  | 4800414  | 1.09 |
| 1    | 6047292  | 5639284  | 1.07 |
| 1    | 6047292  | 5639284  | 1.07 |
| 0.99 | 4643277  | 4674087  | 0.99 |
| 1    | 2.21E+08 | 2.19E+08 | 1.01 |
| 0.98 | 2.30E+07 | 1.96E+07 | 1.17 |
| 1    | 5330924  | 4419844  | 1.21 |
| 0.96 | 1.47E+07 | 1.31E+07 | 1.12 |
| 0.95 | 1.29E+07 | 1.41E+07 | 0.91 |
| 0.79 | 1.32E+07 | 1.80E+07 | 0.73 |
| 1    | 2.62E+07 | 2.08E+07 | 1.26 |
| 0.99 | 2.71E+07 | 2.34E+07 | 1.16 |
| 1    | 2.89E+07 | 2.45E+07 | 1.18 |
| 1    | 6.46E+07 | 5.29E+07 | 1.22 |
| 1    | 8.09E+07 | 7.12E+07 | 1.14 |
| 1    | 1.79E+08 | 1.63E+08 | 1.10 |
| 0.84 | 1877942  | 2209067  | 0.85 |
| 0.98 | 3982927  | 3105789  | 1.28 |

|      |          |          |      |
|------|----------|----------|------|
| 0.99 | 1.08E+07 | 8889080  | 1.21 |
| 0.88 | 1.04E+07 | 1.18E+07 | 0.88 |
| 0.97 | 1.07E+07 | 1.22E+07 | 0.88 |
| 0.97 | 1.07E+07 | 1.22E+07 | 0.88 |
| 0.99 | 2.22E+07 | 1.66E+07 | 1.34 |
| 0.96 | 2718513  | 2745851  | 0.99 |
| 0.97 | 1.14E+07 | 1.09E+07 | 1.05 |
| 1    | 3.52E+07 | 2.94E+07 | 1.20 |
| 0.99 | 2814382  | 2404542  | 1.17 |
| 0.99 | 2814382  | 2404542  | 1.17 |
| 0.97 | 3464707  | 2263869  | 1.53 |
| 0.98 | 6349201  | 5475787  | 1.16 |
| 0.95 | 7838782  | 6645480  | 1.18 |
| 0.95 | 8113881  | 6658741  | 1.22 |
| 0.99 | 1.10E+07 | 8852574  | 1.24 |
| 0.99 | 2.91E+07 | 2.34E+07 | 1.24 |
| 1    | 2.88E+07 | 2.37E+07 | 1.22 |
| 0.78 | 6.01E+07 | 4.26E+07 | 1.41 |
| 0.98 | 5.53E+07 | 4.53E+07 | 1.22 |
| 0.97 | 1385164  | 1294657  | 1.07 |
| 0.97 | 1.05E+07 | 1.03E+07 | 1.02 |
| 0.99 | 2.16E+07 | 2.43E+07 | 0.89 |
| 0.82 | 1934524  | 655743   | 2.95 |
| 0.96 | 1.63E+07 | 1.42E+07 | 1.15 |
| 0.81 | 1897813  | 1576802  | 1.20 |
| 0.86 | 1.07E+07 | 1.21E+07 | 0.88 |
| 1    | 1714369  | 1714369  | 1.00 |
| 0.87 | 826382   | 635110   | 1.30 |
| 0.98 | 1.67E+07 | 1.27E+07 | 1.31 |
| 0.98 | 1.67E+07 | 1.27E+07 | 1.31 |
| 0.94 | 3132917  | 3689035  | 0.85 |
| 0.97 | 1.85E+07 | 1.44E+07 | 1.28 |
| 0.99 | 4003114  | 3615365  | 1.11 |
| 1    | 495943   | 495943   | 1.00 |
| 0.99 | 5881592  | 4317482  | 1.36 |
| 0.99 | 5881592  | 4317482  | 1.36 |
| 0.99 | 1277763  | 1150491  | 1.11 |
| 0.83 | 2482449  | 2256378  | 1.10 |
| 0.83 | 2482449  | 2256378  | 1.10 |
| 0.99 | 2.45E+07 | 2.29E+07 | 1.07 |
| 1    | 3.68E+07 | 3.58E+07 | 1.03 |
| 0.96 | 2724353  | 2122067  | 1.28 |
| 0.94 | 1250976  | 1301960  | 0.96 |
| 0.97 | 2381379  | 2575271  | 0.92 |
| 0.97 | 2381379  | 2575271  | 0.92 |
| 0.98 | 3263025  | 2882224  | 1.13 |
| 0.98 | 3263025  | 2882224  | 1.13 |
| 0.96 | 5886537  | 4633404  | 1.27 |
| 0.99 | 6727417  | 6173630  | 1.09 |
| 0.97 | 6653919  | 7180082  | 0.93 |
| 0.95 | 1.56E+07 | 1.27E+07 | 1.23 |

|      |          |          |      |
|------|----------|----------|------|
| 0.95 | 1.56E+07 | 1.27E+07 | 1.23 |
| 0.95 | 1.56E+07 | 1.27E+07 | 1.23 |
| 0.99 | 2148398  | 2096083  | 1.02 |
| 0.37 | 2.06E+07 | 3.18E+07 | 0.65 |
| 0.95 | 2832364  | 2371790  | 1.19 |
| 0.99 | 9482128  | 8667465  | 1.09 |
| 0.99 | 9482128  | 8667465  | 1.09 |
| 0.99 | 1.50E+07 | 1.30E+07 | 1.15 |
| 0.99 | 2754835  | 2523624  | 1.09 |
| 0.99 | 2754835  | 2523624  | 1.09 |
| 1    | 3402117  | 3151386  | 1.08 |
| 0.81 | 2759889  | 2184871  | 1.26 |
| 0.98 | 2773341  | 2288219  | 1.21 |
| 1    | 1.79E+07 | 1.44E+07 | 1.24 |
| 0.87 | 2652614  | 1602150  | 1.66 |
| 0.9  | 2935784  | 2902740  | 1.01 |
| 0.86 | 3742400  | 2624367  | 1.43 |
| 0.99 | 4.43E+07 | 3.90E+07 | 1.14 |
| 0.87 | 3410767  | 3059302  | 1.11 |
| 0.98 | 4910225  | 4120484  | 1.19 |
| 1    | 1.45E+07 | 1.55E+07 | 0.94 |
| 0.99 | 1300720  | 1024636  | 1.27 |
| 0.95 | 3191151  | 2740260  | 1.16 |
| 0.98 | 5427751  | 4146747  | 1.31 |
| 0.98 | 1092281  | 1393266  | 0.78 |
| 0.98 | 1092281  | 1393266  | 0.78 |
| 0.99 | 1409513  | 1206280  | 1.17 |
| 0.56 | 1.21E+07 | 2.01E+07 | 0.60 |
| 0.92 | 890485   | 1022207  | 0.87 |
| 0.98 | 951988   | 1036139  | 0.92 |
| 0.97 | 2375277  | 2484110  | 0.96 |
| 0.93 | 3966396  | 3077434  | 1.29 |
| 0.93 | 3966396  | 3077434  | 1.29 |
| 0.95 | 3870259  | 3399513  | 1.14 |
| 0.99 | 2.31E+07 | 2.27E+07 | 1.02 |
| 0.99 | 2.16E+07 | 2.18E+07 | 0.99 |
| 0.95 | 4287664  | 3565509  | 1.20 |
| 0.99 | 7277169  | 6395491  | 1.14 |
| 0.83 | 3.66E+07 | 2.81E+07 | 1.30 |
| 0.91 | 7164910  | 5498464  | 1.30 |
| 0.85 | 6241427  | 6097360  | 1.02 |
| 0.94 | 8937146  | 1.09E+07 | 0.82 |
| 1    | 2043791  | 2538163  | 0.81 |
| 0.98 | 1878924  | 2580290  | 0.73 |
| 0.99 | 5430851  | 4805337  | 1.13 |
| 1    | 6135318  | 6048128  | 1.01 |
| 0.96 | 5564154  | 6218355  | 0.89 |
| 0.99 | 8844813  | 8303581  | 1.07 |
| 1    | 2.42E+07 | 3.02E+07 | 0.80 |
| 1    | 8.77E+07 | 8.70E+07 | 1.01 |
| 0.95 | 3229713  | 2887196  | 1.12 |

|      |          |          |      |
|------|----------|----------|------|
| 0.81 | 5.57E+07 | 4.46E+07 | 1.25 |
| 1    | 3.13E+08 | 2.59E+08 | 1.21 |
| 0.93 | 1.34E+07 | 1.43E+07 | 0.94 |
| 0.87 | 890406   | 830115   | 1.07 |
| 0.99 | 4462703  | 4504611  | 0.99 |
| 0.99 | 4462703  | 4504611  | 0.99 |
| 0.99 | 1.28E+07 | 1.18E+07 | 1.08 |
| 0.99 | 5.51E+07 | 5.76E+07 | 0.96 |
| 1    | 7.65E+07 | 7.74E+07 | 0.99 |
| 0.74 | 1.65E+07 | 1.81E+07 | 0.91 |
| 0.98 | 6330228  | 5784151  | 1.09 |
| 0.97 | 1794185  | 1524753  | 1.18 |
| 0.94 | 3257230  | 2552192  | 1.28 |
| 0.95 | 3636165  | 2887167  | 1.26 |
| 0.84 | 5408175  | 3348270  | 1.62 |
| 0.99 | 4540760  | 4089608  | 1.11 |
| 0.99 | 7060904  | 6908325  | 1.02 |
| 0.99 | 6839660  | 7556367  | 0.91 |
| 0.99 | 6839660  | 7556367  | 0.91 |
| 0.98 | 9345714  | 8657081  | 1.08 |
| 1    | 1.03E+07 | 9171218  | 1.12 |
| 0.99 | 1.36E+07 | 1.11E+07 | 1.23 |
| 1    | 1.70E+07 | 1.63E+07 | 1.04 |
| 0.99 | 2.03E+07 | 1.69E+07 | 1.20 |
| 0.99 | 2.03E+07 | 1.69E+07 | 1.20 |
| 1    | 2.21E+07 | 2.00E+07 | 1.11 |
| 0.96 | 3.78E+07 | 2.97E+07 | 1.27 |
| 0.97 | 4.77E+07 | 4.25E+07 | 1.12 |
| 0.99 | 2.50E+07 | 5.92E+07 | 0.42 |
| 1    | 8.36E+07 | 8.03E+07 | 1.04 |
| 1    | 8.36E+07 | 8.03E+07 | 1.04 |
| 0.99 | 8.69E+07 | 8.33E+07 | 1.04 |
| 0.99 | 8.69E+07 | 8.33E+07 | 1.04 |
| 0.96 | 378461   | 418993   | 0.90 |
| 0.97 | 546966   | 524347   | 1.04 |
| 0.97 | 5766099  | 5298499  | 1.09 |
| 0.99 | 7540883  | 7012607  | 1.08 |
| 0.82 | 1.01E+07 | 1.53E+07 | 0.66 |
| 0.89 | 9503122  | 2.54E+07 | 0.37 |
| 0.91 | 1118787  | 1464991  | 0.76 |
| 0.84 | 3200518  | 3534381  | 0.91 |
| 0.93 | 6891394  | 7371748  | 0.93 |
| 0.81 | 1.53E+07 | 1.95E+07 | 0.78 |
| 0.89 | 1513500  | 1442788  | 1.05 |
| 0.99 | 3925510  | 3390756  | 1.16 |
| 0.69 | 3.46E+07 | 1.25E+07 | 2.77 |
| 0.99 | 1.37E+07 | 1.15E+07 | 1.19 |
| 0.99 | 1.37E+07 | 1.15E+07 | 1.19 |
| 1    | 2.52E+07 | 2.34E+07 | 1.08 |
| 0.95 | 1051508  | 1301557  | 0.81 |
| 0.83 | 2754204  | 2603671  | 1.06 |



|      |          |          |      |
|------|----------|----------|------|
| 0.87 | 3459268  | 2825454  | 1.22 |
| 0.99 | 1.01E+07 | 8677981  | 1.16 |
| 0.99 | 1.50E+07 | 1.29E+07 | 1.16 |
| 0.99 | 1.50E+07 | 1.29E+07 | 1.16 |
| 0.99 | 3.18E+07 | 2.56E+07 | 1.24 |
| 1    | 4.36E+07 | 3.96E+07 | 1.10 |
| 0.99 | 5.32E+07 | 5.25E+07 | 1.01 |
| 0.99 | 7.68E+07 | 6.83E+07 | 1.12 |
| 0.99 | 7.68E+07 | 6.83E+07 | 1.12 |
| 0.96 | 1917728  | 1752766  | 1.09 |
| 1    | 2415130  | 2267658  | 1.07 |
| 0.8  | 1.05E+07 | 2543321  | 4.13 |
| 0.8  | 1.05E+07 | 2543321  | 4.13 |
| 0.98 | 4309422  | 4478939  | 0.96 |
| 0.98 | 4309422  | 4478939  | 0.96 |
| 0.99 | 5851998  | 5272422  | 1.11 |
| 0.99 | 5851998  | 5272422  | 1.11 |
| 0.99 | 5851998  | 5272422  | 1.11 |
| 0.99 | 9645821  | 9492222  | 1.02 |
| 0.99 | 9645821  | 9492222  | 1.02 |
| 0.92 | 3.60E+07 | 3.24E+07 | 1.11 |
| 0.92 | 3.60E+07 | 3.24E+07 | 1.11 |
| 0.98 | 1565937  | 1392657  | 1.12 |
| 0.83 | 6842318  | 5218653  | 1.31 |
| 0.87 | 1.79E+07 | 1.69E+07 | 1.06 |
| 0.95 | 6735369  | 4686292  | 1.44 |
| 0.94 | 4.92E+07 | 6.14E+07 | 0.80 |
| 0.89 | 1431933  | 1257648  | 1.14 |
| 0.98 | 1792401  | 1840171  | 0.97 |
| 0.76 | 3341059  | 2163963  | 1.54 |
| 0.97 | 3715031  | 3114100  | 1.19 |
| 0.99 | 2.56E+07 | 2.15E+07 | 1.19 |
| 0.72 | 879755   | 1084782  | 0.81 |
| 0.87 | 3330841  | 2802973  | 1.19 |
| 0.94 | 3582856  | 3792864  | 0.94 |
| 1    | 6.31E+07 | 4.04E+07 | 1.56 |
| 1    | 7207461  | 6502858  | 1.11 |
| 0.85 | 6448460  | 3154649  | 2.04 |
| 0.98 | 8968625  | 1.01E+07 | 0.89 |
| 0.96 | 1285902  | 1053891  | 1.22 |
| 0.97 | 2870880  | 1661809  | 1.73 |
| 0.99 | 1.01E+07 | 9315272  | 1.08 |
| 0.91 | 607495   | 488400   | 1.24 |
| 0.97 | 2643151  | 2342461  | 1.13 |
| 0.97 | 2643151  | 2342461  | 1.13 |
| 0.97 | 2402533  | 2343668  | 1.03 |
| 0.81 | 7291565  | 5750604  | 1.27 |
| 0.99 | 3493984  | 5.62E+07 | 0.06 |
| 0.97 | 611249   | 587346   | 1.04 |
| 0.97 | 611249   | 587346   | 1.04 |
| 0.91 | 825818   | 718045   | 1.15 |

|      |          |          |      |
|------|----------|----------|------|
| 0.98 | 1154621  | 1047230  | 1.10 |
| 0.92 | 7840407  | 7352099  | 1.07 |
| 0.98 | 8405365  | 8943860  | 0.94 |
| 1    | 1.49E+07 | 1.34E+07 | 1.11 |
| 0.99 | 2.33E+07 | 1.99E+07 | 1.17 |
| 0.76 | 1.69E+07 | 3.61E+07 | 0.47 |
| 1    | 4.09E+07 | 3.97E+07 | 1.03 |
| 0.76 | 4610620  | 2723459  | 1.69 |
| 0.73 | 5447713  | 8100278  | 0.67 |
| 0.52 | 5.55E+07 | 2.42E+07 | 2.29 |
| 0.91 | 2001301  | 1632634  | 1.23 |
| 1    | 1.20E+07 | 1.13E+07 | 1.06 |
| 0.98 | 2.37E+07 | 2.15E+07 | 1.10 |
| 0.99 | 4.03E+07 | 3.25E+07 | 1.24 |
| 0.95 | 1072080  | 639194   | 1.68 |
| 1    | 2836592  | 2199213  | 1.29 |
| 0.93 | 3809739  | 5116393  | 0.74 |
| 0.89 | 6347282  | 5227593  | 1.21 |
| 0.99 | 9311164  | 8577754  | 1.09 |
| 1    | 1.11E+07 | 1.09E+07 | 1.02 |
| 0.84 | 268038   | 289209   | 0.93 |
| 0.94 | 8419562  | 9656571  | 0.87 |
| 0.94 | 8419562  | 9656571  | 0.87 |
| 0.98 | 1.89E+07 | 1.83E+07 | 1.03 |
| 0.95 | 1761850  | 1363367  | 1.29 |
| 0.99 | 3049875  | 2834000  | 1.08 |
| 1    | 2360245  | 2070684  | 1.14 |
| 1    | 9757635  | 8538738  | 1.14 |
| 0.95 | 5043798  | 5113824  | 0.99 |
| 1    | 1.24E+07 | 1.25E+07 | 0.99 |
| 0.99 | 6073238  | 5294740  | 1.15 |
| 0.99 | 6073238  | 5294740  | 1.15 |
| 0.99 | 1.80E+07 | 1.55E+07 | 1.16 |
| 1    | 5475441  | 4794162  | 1.14 |
| 0.98 | 951814   | 945572   | 1.01 |
| 0.98 | 1591840  | 1549645  | 1.03 |
| 0.96 | 1154251  | 1621519  | 0.71 |
| 0.99 | 1815316  | 1904090  | 0.95 |
| 0.99 | 5655022  | 5645454  | 1.00 |
| 1    | 6097078  | 5938336  | 1.03 |
| 1    | 1.23E+07 | 1.24E+07 | 0.99 |
| 1    | 7.65E+07 | 8.36E+07 | 0.92 |
| 0.99 | 2578295  | 2189723  | 1.18 |
| 0.99 | 5518788  | 4534858  | 1.22 |
| 0.98 | 6555003  | 6110755  | 1.07 |
| 0.98 | 6555003  | 6110755  | 1.07 |
| 0.94 | 7326449  | 6929165  | 1.06 |
| 1    | 8480451  | 7584364  | 1.12 |
| 0.75 | 1597668  | 1153251  | 1.39 |
| 1    | 3.86E+07 | 3.22E+07 | 1.20 |
| 0.93 | 1875244  | 2.42E+07 | 0.08 |

|      |          |          |      |
|------|----------|----------|------|
| 1    | 1.67E+07 | 1.38E+07 | 1.21 |
| 0.95 | 2328348  | 1856376  | 1.25 |
| 0.91 | 5646465  | 5253939  | 1.07 |
| 0.97 | 1028190  | 932778   | 1.10 |
| 0.99 | 1679472  | 1489328  | 1.13 |
| 0.99 | 2668958  | 2632006  | 1.01 |
| 1    | 3138148  | 2853657  | 1.10 |
| 0.98 | 3566844  | 3562564  | 1.00 |
| 0.98 | 3566844  | 3562564  | 1.00 |
| 0.99 | 3945020  | 3737047  | 1.06 |
| 1    | 7083470  | 6541687  | 1.08 |
| 1    | 7083470  | 6541687  | 1.08 |
| 1    | 1.09E+07 | 9430946  | 1.16 |
| 1    | 1.24E+07 | 1.04E+07 | 1.19 |
| 0.99 | 1.88E+07 | 1.62E+07 | 1.16 |
| 1    | 2.42E+07 | 2.05E+07 | 1.18 |
| 0.97 | 3.57E+07 | 4.31E+07 | 0.83 |
| 0.99 | 5.13E+07 | 4.98E+07 | 1.03 |
| 0.93 | 5238924  | 3245230  | 1.61 |
| 0.98 | 5692732  | 4911114  | 1.16 |
| 0.89 | 2.24E+07 | 1.30E+07 | 1.72 |
| 0.93 | 722144   | 811609   | 0.89 |
| 0.94 | 1468707  | 1194763  | 1.23 |
| 0.98 | 1614951  | 1439186  | 1.12 |
| 0.98 | 1614951  | 1439186  | 1.12 |
| 0.98 | 1614951  | 1439186  | 1.12 |
| 1    | 2717135  | 2222127  | 1.22 |
| 1    | 2717135  | 2222127  | 1.22 |
| 1    | 9558266  | 7014681  | 1.36 |
| 0.76 | 912894   | 1089789  | 0.84 |
| 0.86 | 1.03E+07 | 1.23E+07 | 0.84 |
| 0.57 | 3582406  | 2.71E+07 | 0.13 |
| 0.99 | 1763055  | 1405966  | 1.25 |
| 0.89 | 2784812  | 2783271  | 1.00 |
| 0.96 | 4278685  | 3555558  | 1.20 |
| 0.96 | 4278685  | 3555558  | 1.20 |
| 0.99 | 9219038  | 8303740  | 1.11 |
| 0.98 | 9879827  | 8980437  | 1.10 |
| 0.99 | 9824122  | 9107759  | 1.08 |
| 0.99 | 1.21E+07 | 1.01E+07 | 1.20 |
| 0.99 | 2.60E+07 | 2.04E+07 | 1.27 |
| 0.99 | 2.60E+07 | 2.04E+07 | 1.27 |
| 1    | 3.26E+07 | 2.82E+07 | 1.16 |
| 1    | 9.92E+07 | 8.55E+07 | 1.16 |
| 0.71 | 3428617  | 892536   | 3.84 |
| 0.95 | 455494   | 416322   | 1.09 |
| 0.85 | 4670271  | 4886656  | 0.96 |
| 0.88 | 3176816  | 1.01E+07 | 0.31 |
| 0.74 | 1.94E+07 | 2.16E+07 | 0.90 |
| 1    | 2.59E+07 | 2.44E+07 | 1.06 |
| 1    | 4.85E+07 | 4.17E+07 | 1.16 |

|      |          |          |      |
|------|----------|----------|------|
| 1    | 1.60E+08 | 1.26E+08 | 1.27 |
| 0.89 | 4212236  | 4179341  | 1.01 |
| 0.94 | 4832200  | 5964794  | 0.81 |
| 0.98 | 1864149  | 1933488  | 0.96 |
| 0.92 | 3417958  | 3019711  | 1.13 |
| 0.98 | 1013415  | 898845   | 1.13 |
| 1    | 4966524  | 4078341  | 1.22 |
| 1    | 1.90E+07 | 1.64E+07 | 1.16 |
| 1    | 4.74E+07 | 3.97E+07 | 1.19 |
| 1    | 1.74E+08 | 1.50E+08 | 1.16 |
| 0.94 | 994684   | 870114   | 1.14 |
| 0.94 | 1.27E+07 | 1.49E+07 | 0.85 |
| 0.99 | 894869   | 1036866  | 0.86 |
| 0.98 | 1125425  | 1239115  | 0.91 |
| 0.99 | 2705066  | 2715876  | 1.00 |
| 0.94 | 2511739  | 1693578  | 1.48 |
| 0.96 | 760171   | 759340   | 1.00 |
| 0.96 | 760171   | 759340   | 1.00 |
| 0.97 | 6427991  | 5198474  | 1.24 |
| 0.98 | 5745071  | 5393671  | 1.07 |
| 0.98 | 5745071  | 5393671  | 1.07 |
| 1    | 6750949  | 6750949  | 1.00 |
| 0.99 | 2408199  | 2005611  | 1.20 |
| 0.35 | 4639767  | 2623971  | 1.77 |
| 0.78 | 6396053  | 4937369  | 1.30 |
| 0.97 | 5847162  | 5768497  | 1.01 |
| 0.85 | 6361161  | 6477938  | 0.98 |
| 0.85 | 9728093  | 7740462  | 1.26 |
| 0.93 | 6722791  | 8729812  | 0.77 |
| 0.85 | 1.37E+07 | 8796880  | 1.56 |
| 0.97 | 2.76E+07 | 2.38E+07 | 1.16 |
| 0.85 | 2098833  | 2082100  | 1.01 |
| 0.99 | 1254338  | 1239831  | 1.01 |
| 0.97 | 3482229  | 2903058  | 1.20 |
| 0.98 | 3732419  | 3211960  | 1.16 |
| 0.98 | 9581062  | 8138341  | 1.18 |
| 0.98 | 9581062  | 8138341  | 1.18 |
| 0.97 | 1.41E+07 | 1.18E+07 | 1.19 |
| 0.98 | 1.76E+07 | 1.67E+07 | 1.05 |
| 0.29 | 1693820  | 3298460  | 0.51 |
| 0.98 | 9095775  | 3249826  | 2.80 |
| 0.98 | 2387423  | 2034267  | 1.17 |
| 0.98 | 2347336  | 2147053  | 1.09 |
| 0.99 | 2347604  | 2242786  | 1.05 |
| 0.8  | 5565241  | 3252306  | 1.71 |
| 0.93 | 693540   | 1048449  | 0.66 |
| 0.94 | 2250595  | 2487664  | 0.90 |
| 0.98 | 2078853  | 3224028  | 0.64 |
| 0.98 | 6834792  | 7508415  | 0.91 |
| 0.97 | 1.12E+07 | 1.23E+07 | 0.91 |
| 1    | 2.89E+07 | 2.96E+07 | 0.98 |

|      |          |          |      |
|------|----------|----------|------|
| 0.98 | 1192365  | 950298   | 1.25 |
| 0.93 | 2516823  | 1829047  | 1.38 |
| 0.91 | 2484845  | 2159184  | 1.15 |
| 0.96 | 3450568  | 2874032  | 1.20 |
| 0.98 | 5745147  | 4785075  | 1.20 |
| 0.98 | 7521789  | 6381729  | 1.18 |
| 0.98 | 7521789  | 6381729  | 1.18 |
| 1    | 7639326  | 6837974  | 1.12 |
| 0.97 | 1793098  | 1511809  | 1.19 |
| 0.9  | 2969008  | 3611802  | 0.82 |
| 0.82 | 1988642  | 1647218  | 1.21 |
| 0.95 | 2886144  | 2477816  | 1.16 |
| 0.97 | 3417554  | 3714375  | 0.92 |
| 0.85 | 667193   | 3259753  | 0.20 |
| 0.98 | 2.34E+07 | 2.10E+07 | 1.11 |
| 0.99 | 2651116  | 2346106  | 1.13 |
| 0.94 | 3784871  | 3816289  | 0.99 |
| 0.98 | 1.05E+07 | 9728064  | 1.08 |
| 0.91 | 370553   | 328011   | 1.13 |
| 0.95 | 2525343  | 932123   | 2.71 |
| 0.96 | 2033378  | 2458383  | 0.83 |
| 0.98 | 6066360  | 2870914  | 2.11 |
| 0.98 | 6066360  | 2870914  | 2.11 |
| 1    | 3.10E+07 | 1.50E+07 | 2.07 |
| 1    | 3.10E+07 | 1.50E+07 | 2.07 |
| 0.99 | 3.82E+07 | 3.20E+07 | 1.19 |
| 1    | 4.57E+07 | 4.04E+07 | 1.13 |
| 0.99 | 1720003  | 1368581  | 1.26 |
| 0.76 | 3421234  | 3345379  | 1.02 |
| 0.99 | 5473573  | 4705573  | 1.16 |
| 0.99 | 7176981  | 6777928  | 1.06 |
| 0.99 | 1.54E+07 | 1.04E+07 | 1.48 |
| 0.97 | 1.52E+07 | 6545831  | 2.32 |
| 0.97 | 2691115  | 2280538  | 1.18 |
| 0.97 | 2691115  | 2280538  | 1.18 |
| 0.96 | 9294068  | 8137063  | 1.14 |
| 0.96 | 596521   | 475837   | 1.25 |
| 0.97 | 2696286  | 2209683  | 1.22 |
| 0.97 | 2696286  | 2209683  | 1.22 |
| 0.97 | 4337090  | 3630942  | 1.19 |
| 0.97 | 4874217  | 4873123  | 1.00 |
| 0.97 | 4874217  | 4873123  | 1.00 |
| 0.98 | 1299449  | 1079632  | 1.20 |
| 0.98 | 1299449  | 1079632  | 1.20 |
| 0.99 | 4025123  | 4148788  | 0.97 |
| 0.94 | 1099709  | 792044   | 1.39 |
| 0.97 | 1185719  | 1143840  | 1.04 |
| 0.95 | 1822331  | 1846842  | 0.99 |
| 0.99 | 2802444  | 2628203  | 1.07 |
| 0.98 | 2694125  | 2739843  | 0.98 |
| 0.96 | 6063746  | 6675873  | 0.91 |

|      |          |          |      |
|------|----------|----------|------|
| 0.97 | 7513970  | 7531190  | 1.00 |
| 0.98 | 8895252  | 8436936  | 1.05 |
| 0.96 | 8441893  | 9217419  | 0.92 |
| 0.99 | 1.05E+07 | 9292670  | 1.13 |
| 0.04 | 2658887  | 1.17E+07 | 0.23 |
| 1    | 1.39E+07 | 1.29E+07 | 1.08 |
| 0.94 | 6.63E+07 | 6.17E+07 | 1.07 |
| 0.94 | 6.63E+07 | 6.17E+07 | 1.07 |
| 0.99 | 6.57E+07 | 6.35E+07 | 1.03 |
| 0.99 | 6.57E+07 | 6.35E+07 | 1.03 |
| 0.96 | 1203776  | 710598   | 1.69 |
| 0.96 | 358509   | 312694   | 1.15 |
| 0.98 | 1085430  | 975365   | 1.11 |
| 0.95 | 7453487  | 9484758  | 0.79 |
| 0.95 | 1.87E+07 | 1.87E+07 | 1.00 |
| 0.98 | 3365763  | 2859561  | 1.18 |
| 0.98 | 5762309  | 4298861  | 1.34 |
| 0.79 | 1.07E+07 | 1.15E+07 | 0.93 |
| 0.96 | 1.13E+07 | 1.14E+07 | 0.99 |
| 0.94 | 1.16E+07 | 1.29E+07 | 0.90 |
| 0.87 | 6939352  | 1.41E+07 | 0.49 |
| 0.96 | 2518764  | 3679227  | 0.68 |
| 0.97 | 2901634  | 1923205  | 1.51 |
| 0.97 | 2901634  | 1923205  | 1.51 |
| 0.92 | 1382050  | 1438680  | 0.96 |
| 0.92 | 1382050  | 1438680  | 0.96 |
| 0.99 | 1810011  | 1573141  | 1.15 |
| 0.93 | 4060048  | 3325931  | 1.22 |
| 0.92 | 783732   | 725864   | 1.08 |
| 1    | 4571957  | 4138301  | 1.10 |
| 0.95 | 1653197  | 1442134  | 1.15 |
| 0.97 | 1942688  | 1653041  | 1.18 |
| 0.97 | 1942688  | 1653041  | 1.18 |
| 0.96 | 3384729  | 3760384  | 0.90 |
| 0.99 | 4784544  | 4374000  | 1.09 |
| 0.98 | 6769694  | 7267711  | 0.93 |
| 0.89 | 2580302  | 2613145  | 0.99 |
| 0.87 | 1958080  | 1461678  | 1.34 |
| 0.92 | 1293288  | 1762689  | 0.73 |
| 0.88 | 5240723  | 5086651  | 1.03 |
| 0.88 | 5240723  | 5086651  | 1.03 |
| 1    | 6361977  | 6715620  | 0.95 |
| 0.99 | 1.67E+07 | 1.34E+07 | 1.25 |
| 0.99 | 1.67E+07 | 1.34E+07 | 1.25 |
| 0.98 | 2.19E+07 | 1.72E+07 | 1.27 |
| 1    | 7.81E+07 | 6.14E+07 | 1.27 |
| 0.95 | 636672   | 675376   | 0.94 |
| 0.95 | 4931652  | 5092309  | 0.97 |
| 0.92 | 1.33E+07 | 8908324  | 1.49 |
| 0.95 | 1.10E+07 | 1.25E+07 | 0.88 |
| 0.99 | 2.83E+07 | 2.38E+07 | 1.19 |

|      |          |          |      |
|------|----------|----------|------|
| 0.99 | 2.83E+07 | 2.38E+07 | 1.19 |
| 0.94 | 1529440  | 1007788  | 1.52 |
| 1    | 1.11E+08 | 8.61E+07 | 1.29 |
| 0.98 | 2.60E+07 | 2.38E+07 | 1.09 |
| 0.9  | 627555   | 658749   | 0.95 |
| 0.85 | 861885   | 1583674  | 0.54 |
| 0.99 | 5290068  | 5582967  | 0.95 |
| 0.22 | 1.87E+07 | 6839636  | 2.73 |
| 0.9  | 4235422  | 3820579  | 1.11 |
| 0.9  | 4235422  | 3820579  | 1.11 |
| 0.94 | 5729846  | 4051809  | 1.41 |
| 0.98 | 2.19E+07 | 1.81E+07 | 1.21 |
| 0.98 | 2.19E+07 | 1.81E+07 | 1.21 |
| 1    | 6.09E+07 | 5.54E+07 | 1.10 |
| 1    | 1775636  | 1524555  | 1.16 |
| 0.93 | 9196298  | 1.00E+07 | 0.92 |
| 0.98 | 3933493  | 3606803  | 1.09 |
| 0.95 | 8828160  | 1.05E+07 | 0.84 |
| 0.98 | 2.14E+07 | 1.79E+07 | 1.20 |
| 0.98 | 2.14E+07 | 1.79E+07 | 1.20 |
| 0.96 | 2232338  | 1852792  | 1.20 |
| 0.82 | 2450902  | 2220847  | 1.10 |
| 0.94 | 2477083  | 2375069  | 1.04 |
| 0.94 | 1.16E+07 | 1.11E+07 | 1.05 |
| 0.94 | 1.09E+07 | 1.16E+07 | 0.94 |
| 0.98 | 8177905  | 7231178  | 1.13 |
| 0.99 | 1.30E+07 | 1.34E+07 | 0.97 |
| 0.95 | 1593271  | 1198321  | 1.33 |
| 0.94 | 1394765  | 1253698  | 1.11 |
| 0.99 | 6680043  | 6045770  | 1.10 |
| 0.99 | 7802471  | 7766359  | 1.00 |
| 0.99 | 7802471  | 7766359  | 1.00 |
| 0.98 | 9679125  | 8351012  | 1.16 |
| 0.98 | 9008121  | 1.04E+07 | 0.87 |
| 0.99 | 1.32E+07 | 1.31E+07 | 1.01 |
| 0.98 | 1.46E+07 | 1.51E+07 | 0.97 |
| 0.99 | 2609398  | 2579419  | 1.01 |
| 0.99 | 3566990  | 3251327  | 1.10 |
| 1    | 4376194  | 3681361  | 1.19 |
| 0.93 | 3807157  | 3708764  | 1.03 |
| 0.93 | 3807157  | 3708764  | 1.03 |
| 0.92 | 3875021  | 3289318  | 1.18 |
| 0.98 | 4655973  | 4048790  | 1.15 |
| 0.98 | 5287110  | 5341860  | 0.99 |
| 0.92 | 2010876  | 1828571  | 1.10 |
| 0.97 | 1544621  | 1597621  | 0.97 |
| 0.76 | 4751281  | 4542279  | 1.05 |
| 0.99 | 3.03E+07 | 2.59E+07 | 1.17 |
| 0.81 | 8362171  | 4864359  | 1.72 |
| 0.81 | 8362171  | 4864359  | 1.72 |
| 0.71 | 2.06E+07 | 3204031  | 6.43 |

|      |          |          |       |
|------|----------|----------|-------|
| 0.79 | 3842440  | 369264   | 10.41 |
| 0.72 | 124064   | 2602639  | 0.05  |
| 0.91 | 1190399  | 1078545  | 1.10  |
| 0.97 | 5018464  | 4400546  | 1.14  |
| 0.99 | 1.72E+07 | 1.64E+07 | 1.05  |
| 0.73 | 735493   | 947475   | 0.78  |
| 0.73 | 735493   | 947475   | 0.78  |
| 0.99 | 1450192  | 1338635  | 1.08  |
| 0.94 | 4429453  | 4175718  | 1.06  |
| 0.98 | 1.29E+07 | 1.09E+07 | 1.18  |
| 0.98 | 2356147  | 2985058  | 0.79  |
| 0.98 | 2356147  | 2985058  | 0.79  |
| 0.97 | 2833749  | 3234833  | 0.88  |
| 0.99 | 830204   | 837737   | 0.99  |
| 1    | 1.14E+07 | 1.05E+07 | 1.09  |
| 0.98 | 8770100  | 8667180  | 1.01  |
| 0.99 | 1271827  | 1201832  | 1.06  |
| 0.99 | 1271827  | 1201832  | 1.06  |
| 0.89 | 2018266  | 2416898  | 0.84  |
| 0.94 | 5611939  | 5076216  | 1.11  |
| 0.99 | 2.91E+07 | 2.90E+07 | 1.00  |
| 0.98 | 5.90E+07 | 5.06E+07 | 1.17  |
| 0.51 | 5.07E+08 | 4.97E+08 | 1.02  |
| 0.54 | 5.12E+08 | 5.00E+08 | 1.02  |
| 0.85 | 5.46E+08 | 5.13E+08 | 1.06  |
| 0.93 | 2780056  | 2515633  | 1.11  |
| 0.97 | 4638282  | 3742625  | 1.24  |
| 0.95 | 2762680  | 2372782  | 1.16  |
| 0.96 | 1027099  | 930874   | 1.10  |
| 0.91 | 1369499  | 1146686  | 1.19  |
| 0.92 | 4687594  | 4526389  | 1.04  |
| 0.96 | 645908   | 573410   | 1.13  |
| 0.97 | 2427355  | 2088262  | 1.16  |
| 0.97 | 2427355  | 2088262  | 1.16  |
| 0.99 | 2524937  | 2890060  | 0.87  |
| 0.99 | 1.11E+07 | 1.13E+07 | 0.98  |
| 0.99 | 1.31E+07 | 1.46E+07 | 0.90  |
| 1    | 7.02E+07 | 7.52E+07 | 0.93  |
| 0.99 | 7.92E+07 | 9.84E+07 | 0.80  |
| 0.99 | 5426942  | 4918419  | 1.10  |
| 0.99 | 5426942  | 4918419  | 1.10  |
| 1    | 1.47E+07 | 1.34E+07 | 1.10  |
| 0.99 | 2440200  | 2189362  | 1.11  |
| 0.99 | 3.42E+07 | 2.87E+07 | 1.19  |
| 0.97 | 5.69E+07 | 5.08E+07 | 1.12  |
| 0.44 | 4836799  | 1818940  | 2.66  |
| 0.96 | 1953216  | 2024445  | 0.96  |
| 0.98 | 4758439  | 3585308  | 1.33  |
| 0.87 | 3113854  | 2297504  | 1.36  |
| 0.98 | 7555694  | 5466127  | 1.38  |
| 0.92 | 311460   | 235734   | 1.32  |



|      |          |          |      |
|------|----------|----------|------|
| 1    | 1197295  | 1120861  | 1.07 |
| 0.99 | 2369162  | 2278598  | 1.04 |
| 0.98 | 1.13E+07 | 9594605  | 1.18 |
| 0.94 | 1.19E+07 | 1.08E+07 | 1.10 |
| 0.82 | 2639855  | 2277246  | 1.16 |
| 0.96 | 4596923  | 3833380  | 1.20 |
| 0.38 | 6904584  | 5952950  | 1.16 |
| 0.99 | 1.17E+07 | 1.13E+07 | 1.04 |
| 0.99 | 1.17E+07 | 1.13E+07 | 1.04 |
| 0.99 | 1.17E+07 | 1.13E+07 | 1.04 |
| 1    | 3.22E+07 | 2.96E+07 | 1.09 |
| 0.3  | 2.78E+07 | 3.19E+07 | 0.87 |
| 1    | 6.37E+07 | 5.91E+07 | 1.08 |
| 1    | 6.37E+07 | 5.91E+07 | 1.08 |
| 0.97 | 925123   | 904039   | 1.02 |
| 0.98 | 1922709  | 1501579  | 1.28 |
| 0.89 | 1374313  | 947581   | 1.45 |
| 0.97 | 1.79E+07 | 1.37E+07 | 1.31 |
| 0.82 | 1178732  | 944939   | 1.25 |
| 0.98 | 7039123  | 7701896  | 0.91 |
| 0.96 | 2505472  | 2390033  | 1.05 |
| 0.96 | 2505472  | 2390033  | 1.05 |
| 0.99 | 3562407  | 2729620  | 1.31 |
| 0.87 | 1.02E+07 | 8985281  | 1.14 |
| 0.98 | 2.29E+07 | 2.09E+07 | 1.10 |
| 0.94 | 2474941  | 2451716  | 1.01 |
| 0.98 | 2.33E+07 | 1.95E+07 | 1.19 |
| 0.97 | 2.86E+07 | 2.59E+07 | 1.10 |
| 0.97 | 2.86E+07 | 2.59E+07 | 1.10 |
| 0.98 | 1.09E+08 | 1.00E+08 | 1.09 |
| 0.77 | 1907234  | 1537094  | 1.24 |
| 1    | 5580947  | 4931422  | 1.13 |
| 0.81 | 2426559  | 2029815  | 1.20 |
| 0.99 | 3.30E+07 | 2.67E+07 | 1.24 |
| 0.86 | 3240848  | 4325258  | 0.75 |
| 0.86 | 3240848  | 4325258  | 0.75 |
| 0.96 | 1.65E+07 | 1.26E+07 | 1.31 |
| 0.96 | 1.65E+07 | 1.26E+07 | 1.31 |
| 0.93 | 1.49E+07 | 1.33E+07 | 1.12 |
| 0.98 | 877686   | 856035   | 1.03 |
| 0.75 | 1521096  | 1155844  | 1.32 |
| 0.43 | 1612903  | 1486044  | 1.09 |
| 0.99 | 1.82E+07 | 1.64E+07 | 1.11 |
| 0.99 | 1.82E+07 | 1.64E+07 | 1.11 |
| 1    | 7.73E+07 | 7.30E+07 | 1.06 |
| 0.99 | 3001866  | 2955451  | 1.02 |
| 0.99 | 2.63E+07 | 2.49E+07 | 1.06 |
| 0.96 | 1746662  | 1873304  | 0.93 |
| 0.97 | 1206392  | 1335503  | 0.90 |
| 0.99 | 2428497  | 2074037  | 1.17 |
| 0.99 | 3692955  | 3011037  | 1.23 |

|      |          |          |      |
|------|----------|----------|------|
| 0.99 | 3692955  | 3011037  | 1.23 |
| 0.99 | 1292822  | 1105652  | 1.17 |
| 0.96 | 2032509  | 1607707  | 1.26 |
| 0.99 | 2163764  | 1511529  | 1.43 |
| 0.94 | 2107187  | 2524211  | 0.83 |
| 0.96 | 5807607  | 4621858  | 1.26 |
| 0.73 | 1339730  | 1269849  | 1.06 |
| 0.97 | 1948127  | 1516464  | 1.28 |
| 0.99 | 2002406  | 1774210  | 1.13 |
| 0.95 | 3497860  | 6403192  | 0.55 |
| 0.92 | 1259004  | 1646366  | 0.76 |
| 0.98 | 3925352  | 4105216  | 0.96 |
| 0.96 | 5185271  | 5671598  | 0.91 |
| 0.96 | 5185271  | 5671598  | 0.91 |
| 0.99 | 8290764  | 7508864  | 1.10 |
| 0.99 | 8290764  | 7508864  | 1.10 |
| 1    | 2.60E+07 | 2.40E+07 | 1.08 |
| 0.9  | 1948290  | 1897258  | 1.03 |
| 0.97 | 2168232  | 2311682  | 0.94 |
| 1    | 3719891  | 3313326  | 1.12 |
| 0.99 | 3867086  | 3476544  | 1.11 |
| 0.99 | 5391258  | 4012159  | 1.34 |
| 0.96 | 8936252  | 7248473  | 1.23 |
| 0.98 | 2.03E+07 | 1.92E+07 | 1.06 |
| 0.92 | 2.35E+07 | 2.01E+07 | 1.17 |
| 0.92 | 2.35E+07 | 2.01E+07 | 1.17 |
| 0.92 | 3.14E+07 | 2.57E+07 | 1.22 |
| 0.85 | 2876455  | 1418855  | 2.03 |
| 1    | 5473470  | 4701151  | 1.16 |
| 0.98 | 3789677  | 5204178  | 0.73 |
| 0.96 | 631755   | 601336   | 1.05 |
| 0.94 | 1112003  | 1045757  | 1.06 |
| 0.74 | 2.64E+07 | 3.03E+07 | 0.87 |
| 0.91 | 6515171  | 5781532  | 1.13 |
| 0.98 | 1.02E+07 | 8772042  | 1.16 |
| 0.98 | 1.02E+07 | 8772042  | 1.16 |
| 0.98 | 1.02E+07 | 8772042  | 1.16 |
| 0.9  | 2635666  | 2202662  | 1.20 |
| 0.89 | 7059854  | 3265098  | 2.16 |
| 0.98 | 1526400  | 1377868  | 1.11 |
| 0.88 | 2272023  | 2140104  | 1.06 |
| 0.94 | 4327256  | 4243995  | 1.02 |
| 0.83 | 1989725  | 2433801  | 0.82 |
| 0.99 | 2635516  | 2416413  | 1.09 |
| 0.99 | 2635516  | 2416413  | 1.09 |
| 0.9  | 5212220  | 5192038  | 1.00 |
| 0.63 | 1237574  | 1326784  | 0.93 |
| 1    | 6996300  | 7131296  | 0.98 |
| 0.99 | 1.55E+07 | 1.28E+07 | 1.21 |
| 1    | 1.58E+07 | 1.63E+07 | 0.97 |
| 1    | 3.32E+07 | 3.13E+07 | 1.06 |

|      |          |          |      |
|------|----------|----------|------|
| 0.83 | 1488588  | 1879744  | 0.79 |
| 0.99 | 753648   | 759211   | 0.99 |
| 0.97 | 7436840  | 5653179  | 1.32 |
| 0.71 | 1817241  | 805153   | 2.26 |
| 0.98 | 2.66E+07 | 1.49E+07 | 1.79 |
| 1    | 3.53E+07 | 3.56E+07 | 0.99 |
| 0.74 | 3015812  | 2404046  | 1.25 |
| 0.99 | 8016829  | 7716674  | 1.04 |
| 0.97 | 498408   | 575526   | 0.87 |
| 0.97 | 498408   | 575526   | 0.87 |
| 0.96 | 1941670  | 2008596  | 0.97 |
| 0.87 | 1.53E+07 | 1.45E+07 | 1.06 |
| 1    | 1.55E+07 | 1.54E+07 | 1.01 |
| 0.99 | 1.89E+07 | 1.93E+07 | 0.98 |
| 1    | 3.11E+07 | 3.07E+07 | 1.01 |
| 0.99 | 7691687  | 7522900  | 1.02 |
| 0.9  | 1.77E+07 | 3.36E+07 | 0.53 |
| 0.96 | 2.85E+07 | 4.49E+07 | 0.63 |
| 0.99 | 601432   | 483737   | 1.24 |
| 0.99 | 601432   | 483737   | 1.24 |
| 0.98 | 2730041  | 2056072  | 1.33 |
| 0.9  | 461133   | 418752   | 1.10 |
| 0.87 | 794354   | 615422   | 1.29 |
| 0.98 | 4297843  | 3813295  | 1.13 |
| 0.97 | 5570476  | 4920951  | 1.13 |
| 0.97 | 5570476  | 4920951  | 1.13 |
| 0.82 | 8176893  | 5215011  | 1.57 |
| 0.89 | 3649210  | 1348093  | 2.71 |
| 0.99 | 2216031  | 2107713  | 1.05 |
| 0.99 | 2216031  | 2107713  | 1.05 |
| 0.97 | 1389991  | 1282775  | 1.08 |
| 0.87 | 1586917  | 2396363  | 0.66 |
| 0.99 | 8926512  | 8154002  | 1.09 |
| 0.96 | 2668690  | 2200183  | 1.21 |
| 0.97 | 3066771  | 2520187  | 1.22 |
| 0.97 | 3066771  | 2520187  | 1.22 |
| 0.83 | 438364   | 346227   | 1.27 |
| 0.99 | 4633861  | 4853259  | 0.95 |
| 0.85 | 4113930  | 2502417  | 1.64 |
| 0.94 | 1724431  | 1599658  | 1.08 |
| 0.94 | 1724431  | 1599658  | 1.08 |
| 0.97 | 3679643  | 3245922  | 1.13 |
| 1    | 4.72E+07 | 4.59E+07 | 1.03 |
| 1    | 5.97E+07 | 6.32E+07 | 0.94 |
| 1    | 5.97E+07 | 6.32E+07 | 0.94 |
| 1    | 7.34E+07 | 6.47E+07 | 1.13 |
| 1    | 1.20E+08 | 1.19E+08 | 1.01 |
| 1    | 1.20E+08 | 1.19E+08 | 1.01 |
| 0.93 | 3641496  | 2864997  | 1.27 |
| 0.99 | 4540850  | 4004936  | 1.13 |
| 0.98 | 4859005  | 5982329  | 0.81 |

|      |          |          |      |
|------|----------|----------|------|
| 0.98 | 4859005  | 5982329  | 0.81 |
| 0.99 | 2.48E+07 | 3.83E+07 | 0.65 |
| 0.99 | 2.48E+07 | 3.83E+07 | 0.65 |
| 0.86 | 2912538  | 1665712  | 1.75 |
| 0.95 | 2325021  | 2172306  | 1.07 |
| 0.98 | 8530076  | 6607449  | 1.29 |
| 0.9  | 5438336  | 3872733  | 1.40 |
| 0.94 | 5236106  | 5103426  | 1.03 |
| 0.96 | 8143376  | 7517751  | 1.08 |
| 0.85 | 690417   | 597184   | 1.16 |
| 0.95 | 5203734  | 4758334  | 1.09 |
| 1    | 6992456  | 6992456  | 1.00 |
| 0.98 | 4401581  | 3876689  | 1.14 |
| 0.98 | 4401581  | 3876689  | 1.14 |
| 0.99 | 5076481  | 3355940  | 1.51 |
| 0.99 | 6737423  | 5924773  | 1.14 |
| 0.94 | 1.60E+07 | 1.30E+07 | 1.23 |
| 0.98 | 1.53E+07 | 1.33E+07 | 1.15 |
| 0.91 | 1734200  | 1852430  | 0.94 |
| 0.91 | 1734200  | 1852430  | 0.94 |
| 0.95 | 2574032  | 2027001  | 1.27 |
| 0.95 | 2574032  | 2027001  | 1.27 |
| 0.91 | 4010215  | 3541860  | 1.13 |
| 0.97 | 5078585  | 4111968  | 1.24 |
| 0.99 | 3.39E+07 | 2.81E+07 | 1.21 |
| 0.96 | 1039352  | 949141   | 1.10 |
| 0.94 | 1864781  | 1674115  | 1.11 |
| 0.99 | 831869   | 686557   | 1.21 |
| 0.98 | 2119994  | 1902288  | 1.11 |
| 0.93 | 4883115  | 5308069  | 0.92 |
| 1    | 9882529  | 8948692  | 1.10 |
| 1    | 4.50E+07 | 4.50E+07 | 1.00 |
| 0.99 | 2383502  | 2398316  | 0.99 |
| 0.87 | 742421   | 745584   | 1.00 |
| 0.99 | 4050919  | 3226618  | 1.26 |
| 0.98 | 5903900  | 4742628  | 1.24 |
| 1    | 3.86E+07 | 3.22E+07 | 1.20 |
| 0.9  | 2947692  | 3137910  | 0.94 |
| 0.77 | 258248   | 1673117  | 0.15 |
| 0.98 | 1561136  | 1216104  | 1.28 |
| 0.98 | 1561136  | 1216104  | 1.28 |
| 1    | 8385756  | 7677953  | 1.09 |
| 1    | 8385756  | 7677953  | 1.09 |
| 1    | 1.14E+07 | 1.05E+07 | 1.09 |
| 1    | 2.22E+07 | 2.02E+07 | 1.10 |
| 1    | 2.22E+07 | 2.02E+07 | 1.10 |
| 0.98 | 3.79E+07 | 2.98E+07 | 1.27 |
| 0.98 | 3.79E+07 | 2.98E+07 | 1.27 |
| 1    | 9601887  | 9850164  | 0.97 |
| 1    | 9601887  | 9850164  | 0.97 |
| 1    | 9601887  | 9850164  | 0.97 |

|      |          |          |      |
|------|----------|----------|------|
| 0.93 | 1.38E+07 | 1.18E+07 | 1.17 |
| 0.96 | 936959   | 956152   | 0.98 |
| 0.98 | 2220722  | 1974706  | 1.12 |
| 1    | 1.31E+07 | 1.22E+07 | 1.07 |
| 0.81 | 1.34E+07 | 1.31E+07 | 1.02 |
| 0.89 | 1.47E+07 | 1.74E+07 | 0.84 |
| 1    | 3.13E+07 | 2.66E+07 | 1.18 |
| 0.96 | 4.66E+07 | 4.36E+07 | 1.07 |
| 0.95 | 2679013  | 2867494  | 0.93 |
| 0.99 | 3928942  | 4016587  | 0.98 |
| 1    | 1.13E+07 | 1.08E+07 | 1.05 |
| 0.99 | 1.77E+07 | 1.54E+07 | 1.15 |
| 0.98 | 1.73E+07 | 1.88E+07 | 0.92 |
| 1    | 7.98E+07 | 7.31E+07 | 1.09 |
| 0.97 | 1816892  | 1835156  | 0.99 |
| 0.97 | 1816892  | 1835156  | 0.99 |
| 0.98 | 6329738  | 5509122  | 1.15 |
| 0.87 | 589042   | 516824   | 1.14 |
| 0.87 | 589042   | 516824   | 1.14 |
| 0.86 | 1569359  | 1811005  | 0.87 |
| 0.95 | 1968030  | 1823187  | 1.08 |
| 0.96 | 6128272  | 5317819  | 1.15 |
| 0.96 | 6128272  | 5317819  | 1.15 |
| 0.98 | 1848755  | 1753573  | 1.05 |
| 0.94 | 961007   | 886134   | 1.08 |
| 0.94 | 2178832  | 2212590  | 0.98 |
| 0.97 | 2878834  | 2541800  | 1.13 |
| 0.98 | 5360335  | 5555485  | 0.96 |
| 0.98 | 6459742  | 6259888  | 1.03 |
| 0.98 | 1.86E+07 | 1.68E+07 | 1.11 |
| 1    | 1.99E+07 | 2.06E+07 | 0.97 |
| 0.98 | 1.90E+07 | 2.47E+07 | 0.77 |
| 1    | 2.93E+07 | 3.12E+07 | 0.94 |
| 0.95 | 3.90E+07 | 4.71E+07 | 0.83 |
| 0.99 | 6678628  | 5548061  | 1.20 |
| 0.99 | 3364126  | 2905428  | 1.16 |
| 1    | 1.21E+07 | 1.11E+07 | 1.09 |
| 0.92 | 1.23E+07 | 1.05E+07 | 1.17 |
| 0.97 | 4671507  | 3944757  | 1.18 |
| 0.99 | 3.80E+07 | 3.26E+07 | 1.17 |
| 0.95 | 2783846  | 2411324  | 1.15 |
| 0.91 | 5957933  | 4326360  | 1.38 |
| 0.99 | 4939982  | 4361769  | 1.13 |
| 0.99 | 4939982  | 4361769  | 1.13 |
| 0.99 | 6260993  | 5252260  | 1.19 |
| 0.95 | 5777823  | 6134259  | 0.94 |
| 0.95 | 5777823  | 6134259  | 0.94 |
| 0.96 | 2.37E+07 | 1.69E+07 | 1.40 |
| 1    | 1.50E+08 | 1.38E+08 | 1.09 |
| 0.99 | 2433465  | 2180334  | 1.12 |
| 0.56 | 1407750  | 2431240  | 0.58 |

|      |          |          |       |
|------|----------|----------|-------|
| 1    | 1.40E+07 | 1.53E+07 | 0.92  |
| 0.97 | 1.91E+07 | 1.62E+07 | 1.18  |
| 0.97 | 806218   | 778723   | 1.04  |
| 0.89 | 6651839  | 6937988  | 0.96  |
| 0.72 | 1.45E+07 | 1.20E+07 | 1.21  |
| 0.96 | 6128164  | 5257402  | 1.17  |
| 0.93 | 6005130  | 6305418  | 0.95  |
| 0.96 | 2.46E+07 | 1.97E+07 | 1.25  |
| 0.99 | 5.07E+07 | 5.34E+07 | 0.95  |
| 0.99 | 1481722  | 1338440  | 1.11  |
| 0.97 | 2613987  | 4232284  | 0.62  |
| 0.99 | 3935211  | 5306646  | 0.74  |
| 0.98 | 1.11E+07 | 1.14E+07 | 0.97  |
| 1    | 1.70E+07 | 1.57E+07 | 1.08  |
| 0.99 | 3702335  | 3645197  | 1.02  |
| 0.99 | 3702335  | 3645197  | 1.02  |
| 0.94 | 3660509  | 6377120  | 0.57  |
| 0.94 | 3660509  | 6377120  | 0.57  |
| 0.99 | 8925237  | 1.03E+07 | 0.87  |
| 0.98 | 3554753  | 2648362  | 1.34  |
| 0.98 | 3554753  | 2648362  | 1.34  |
| 1    | 4.36E+07 | 3.92E+07 | 1.11  |
| 0.98 | 2458988  | 2237936  | 1.10  |
| 0.83 | 2451867  | 1.01E+07 | 0.24  |
| 0.99 | 934898   | 1040187  | 0.90  |
| 0.72 | 2951806  | 3491387  | 0.85  |
| 0.99 | 5904470  | 5170133  | 1.14  |
| 0.93 | 9640769  | 9073587  | 1.06  |
| 0.96 | 1.15E+07 | 1.15E+07 | 1.00  |
| 1    | 3.71E+07 | 3.61E+07 | 1.03  |
| 0.8  | 1.24E+07 | 799454   | 15.51 |
| 0.95 | 1988546  | 1830591  | 1.09  |
| 0.98 | 2096012  | 1902729  | 1.10  |
| 0.99 | 3022951  | 3023726  | 1.00  |
| 0.99 | 3022951  | 3023726  | 1.00  |
| 0.99 | 3099635  | 3112731  | 1.00  |
| 0.99 | 3099635  | 3112731  | 1.00  |
| 0.97 | 1.33E+07 | 1.13E+07 | 1.18  |
| 0.98 | 1.17E+07 | 1.19E+07 | 0.98  |
| 0.98 | 1.17E+07 | 1.19E+07 | 0.98  |
| 1    | 1.56E+07 | 1.68E+07 | 0.93  |
| 0.96 | 2.13E+07 | 1.69E+07 | 1.26  |
| 1    | 2.62E+07 | 2.23E+07 | 1.17  |
| 0.93 | 2.36E+07 | 2.30E+07 | 1.03  |
| 0.93 | 2.36E+07 | 2.30E+07 | 1.03  |
| 0.93 | 2.36E+07 | 2.30E+07 | 1.03  |
| 1    | 2.78E+07 | 2.52E+07 | 1.10  |
| 1    | 2.78E+07 | 2.52E+07 | 1.10  |
| 1    | 2.78E+07 | 2.52E+07 | 1.10  |
| 1    | 2.78E+07 | 2.52E+07 | 1.10  |
| 1    | 3.32E+07 | 3.07E+07 | 1.08  |

|      |          |          |      |
|------|----------|----------|------|
| 1    | 3.32E+07 | 3.07E+07 | 1.08 |
| 1    | 6.01E+07 | 4.90E+07 | 1.23 |
| 0.92 | 1.15E+07 | 1.84E+07 | 0.63 |
| 0.92 | 1.09E+07 | 8970200  | 1.22 |
| 0.92 | 1.09E+07 | 8970200  | 1.22 |
| 0.83 | 1.12E+07 | 1.30E+07 | 0.86 |
| 0.96 | 994918   | 785719   | 1.27 |
| 0.98 | 3291169  | 2602811  | 1.26 |
| 0.88 | 6838008  | 4906968  | 1.39 |
| 0.96 | 1.44E+07 | 1.14E+07 | 1.26 |
| 0.96 | 1.44E+07 | 1.14E+07 | 1.26 |
| 1    | 5.12E+07 | 4.35E+07 | 1.18 |
| 1    | 5.12E+07 | 4.35E+07 | 1.18 |
| 1    | 5.12E+07 | 4.35E+07 | 1.18 |
| 0.99 | 795096   | 633569   | 1.25 |
| 0.72 | 1824566  | 1970771  | 0.93 |
| 0.99 | 2773854  | 2375655  | 1.17 |
| 0.86 | 6260484  | 6189918  | 1.01 |
| 0.86 | 2.77E+07 | 2.34E+07 | 1.18 |
| 0.82 | 2835996  | 1882360  | 1.51 |
| 0.99 | 4706236  | 4219490  | 1.12 |
| 0.99 | 4933477  | 4708863  | 1.05 |
| 0.09 | 4535935  | 964949   | 4.70 |
| 0.87 | 1843120  | 1592413  | 1.16 |
| 0.98 | 2802827  | 2640786  | 1.06 |
| 0.98 | 9130123  | 6625392  | 1.38 |
| 0.94 | 1881907  | 1663921  | 1.13 |
| 0.98 | 3184602  | 2776275  | 1.15 |
| 0.99 | 1.39E+07 | 1.31E+07 | 1.06 |
| 0.99 | 1582418  | 1997735  | 0.79 |
| 1    | 9.96E+07 | 8.71E+07 | 1.14 |
| 0.98 | 3377608  | 3308539  | 1.02 |
| 0.92 | 5573810  | 7512319  | 0.74 |
| 0.9  | 1.59E+07 | 3433997  | 4.63 |
| 0.99 | 1.68E+07 | 1.43E+07 | 1.17 |
| 0.97 | 3824094  | 3803631  | 1.01 |
| 0.98 | 1.70E+07 | 1.47E+07 | 1.16 |
| 0.95 | 2.24E+07 | 2.22E+07 | 1.01 |
| 1    | 5.32E+07 | 4.48E+07 | 1.19 |
| 1    | 1.63E+08 | 1.44E+08 | 1.13 |
| 1    | 2.13E+08 | 1.85E+08 | 1.15 |
| 1    | 2.13E+08 | 1.85E+08 | 1.15 |
| 1    | 4.55E+08 | 4.47E+08 | 1.02 |
| 0.97 | 2803991  | 2460987  | 1.14 |
| 0.96 | 1701302  | 1753881  | 0.97 |
| 1    | 3566047  | 3566047  | 1.00 |
| 1    | 2.59E+07 | 2.45E+07 | 1.06 |
| 1    | 2.59E+07 | 2.45E+07 | 1.06 |
| 0.97 | 656079   | 871802   | 0.75 |
| 0.97 | 1785299  | 1654212  | 1.08 |
| 0.99 | 2463943  | 2124763  | 1.16 |

|      |          |          |      |
|------|----------|----------|------|
| 0.99 | 2463943  | 2124763  | 1.16 |
| 0.99 | 2463943  | 2124763  | 1.16 |
| 0.92 | 2010308  | 2272572  | 0.88 |
| 0.96 | 4881969  | 4128611  | 1.18 |
| 0.92 | 1.97E+07 | 1.70E+07 | 1.16 |
| 0.99 | 2.14E+07 | 2.11E+07 | 1.01 |
| 0.99 | 2.14E+07 | 2.11E+07 | 1.01 |
| 0.94 | 503663   | 439844   | 1.15 |
| 0.88 | 2426319  | 2106435  | 1.15 |
| 0.98 | 3436991  | 3370304  | 1.02 |
| 0.83 | 4107141  | 3770290  | 1.09 |
| 0.95 | 6160973  | 4374555  | 1.41 |
| 0.99 | 4947816  | 5309340  | 0.93 |
| 0.96 | 5020554  | 5328517  | 0.94 |
| 1    | 8387499  | 6877382  | 1.22 |
| 0.98 | 8735172  | 7006045  | 1.25 |
| 1    | 7981756  | 7078715  | 1.13 |
| 1    | 1.46E+07 | 1.39E+07 | 1.05 |
| 0.97 | 8057569  | 6705626  | 1.20 |
| 0.99 | 8947806  | 8036558  | 1.11 |
| 1    | 3.26E+07 | 2.92E+07 | 1.12 |
| 0.99 | 3.53E+07 | 3.27E+07 | 1.08 |
| 0.99 | 3.53E+07 | 3.27E+07 | 1.08 |
| 0.74 | 1726431  | 1607016  | 1.07 |
| 0.99 | 7944797  | 7261822  | 1.09 |
| 0.89 | 3464598  | 1.14E+07 | 0.30 |
| 0.99 | 1.57E+07 | 1.52E+07 | 1.03 |
| 0.99 | 1.57E+07 | 1.52E+07 | 1.03 |
| 1    | 3.27E+07 | 3.11E+07 | 1.05 |
| 1    | 4.66E+07 | 3.79E+07 | 1.23 |
| 0.98 | 6.26E+07 | 7.61E+07 | 0.82 |
| 1    | 9.94E+07 | 1.00E+08 | 0.99 |
| 1    | 1.28E+08 | 1.23E+08 | 1.04 |
| 1    | 1.30E+08 | 1.24E+08 | 1.05 |
| 0.92 | 1.25E+07 | 7769723  | 1.61 |
| 0.95 | 2288063  | 2478849  | 0.92 |
| 0.98 | 4127563  | 3921086  | 1.05 |
| 0.85 | 272970   | 449132   | 0.61 |
| 0.99 | 4095235  | 3678265  | 1.11 |
| 0.87 | 9166898  | 6185294  | 1.48 |
| 1    | 1.15E+07 | 1.14E+07 | 1.01 |
| 0.92 | 1.16E+07 | 2.06E+07 | 0.56 |
| 0.96 | 6428415  | 5365317  | 1.20 |
| 0.96 | 2.16E+07 | 2.05E+07 | 1.05 |
| 0.96 | 2.81E+07 | 2.51E+07 | 1.12 |
| 0.96 | 2.81E+07 | 2.51E+07 | 1.12 |
| 1    | 1.51E+08 | 1.36E+08 | 1.11 |
| 0.96 | 984801   | 826480   | 1.19 |
| 0.94 | 1166478  | 935465   | 1.25 |
| 0.96 | 1665008  | 1264887  | 1.32 |
| 0.98 | 2834146  | 2671962  | 1.06 |



|      |          |          |      |
|------|----------|----------|------|
| 0.98 | 1828130  | 1228341  | 1.49 |
| 0.72 | 2656452  | 3274286  | 0.81 |
| 0.99 | 3.56E+07 | 3.65E+07 | 0.98 |
| 0.91 | 2956368  | 3480891  | 0.85 |
| 0.91 | 2956368  | 3480891  | 0.85 |
| 0.96 | 1398114  | 1368350  | 1.02 |
| 0.98 | 1512481  | 1476149  | 1.02 |
| 0.99 | 5304082  | 4558201  | 1.16 |
| 0.79 | 3832522  | 3617882  | 1.06 |
| 0.95 | 6713849  | 5655147  | 1.19 |
| 0.99 | 1278683  | 1633306  | 0.78 |
| 0.99 | 1278683  | 1633306  | 0.78 |
| 0.94 | 1870136  | 2063465  | 0.91 |
| 0.96 | 2543730  | 2419791  | 1.05 |
| 1    | 6388954  | 5148938  | 1.24 |
| 1    | 1.24E+07 | 1.02E+07 | 1.22 |
| 0.93 | 1.31E+07 | 1.90E+07 | 0.69 |
| 0.99 | 2633651  | 2431052  | 1.08 |
| 0.59 | 322355   | 127837   | 2.52 |
| 0.84 | 1.69E+07 | 1.87E+07 | 0.90 |
| 0.84 | 1.69E+07 | 1.87E+07 | 0.90 |
| 0.99 | 1393199  | 1465324  | 0.95 |
| 0.98 | 1247250  | 1553799  | 0.80 |
| 0.81 | 1.70E+07 | 9231738  | 1.84 |
| 0.95 | 3669043  | 3099940  | 1.18 |
| 0.95 | 1.15E+07 | 3558329  | 3.23 |
| 0.99 | 860732   | 967289   | 0.89 |
| 0.85 | 5300760  | 5731050  | 0.92 |
| 0.98 | 1419828  | 1236162  | 1.15 |
| 0.99 | 2.02E+07 | 1.80E+07 | 1.12 |
| 0.99 | 2.02E+07 | 1.80E+07 | 1.12 |
| 0.99 | 3979815  | 2819205  | 1.41 |
| 0.93 | 488703   | 314801   | 1.55 |
| 0.98 | 877548   | 932894   | 0.94 |
| 0.98 | 877548   | 932894   | 0.94 |
| 0.99 | 3947817  | 4124617  | 0.96 |
| 0.98 | 1.39E+07 | 1.39E+07 | 1.00 |
| 0.89 | 969257   | 790158   | 1.23 |
| 0.98 | 4.87E+07 | 2.07E+07 | 2.35 |
| 0.83 | 1.89E+07 | 2.30E+07 | 0.82 |
| 0.98 | 4925720  | 4962532  | 0.99 |
| 0.94 | 1110084  | 947785   | 1.17 |
| 0.98 | 2610635  | 2267964  | 1.15 |
| 0.98 | 2610635  | 2267964  | 1.15 |
| 0.97 | 2812298  | 2369899  | 1.19 |
| 0.97 | 3110831  | 2556630  | 1.22 |
| 0.99 | 2784440  | 2668762  | 1.04 |
| 0.99 | 3349035  | 3030149  | 1.11 |
| 0.97 | 7897271  | 6369493  | 1.24 |
| 1    | 1.92E+07 | 1.61E+07 | 1.19 |
| 0.99 | 1.79E+07 | 1.69E+07 | 1.06 |

|      |          |          |       |
|------|----------|----------|-------|
| 1    | 2.85E+07 | 2.42E+07 | 1.18  |
| 0.97 | 1737573  | 1587746  | 1.09  |
| 0.9  | 460732   | 420499   | 1.10  |
| 0.93 | 2293197  | 1977194  | 1.16  |
| 0.9  | 2226327  | 2131111  | 1.04  |
| 1    | 1829167  | 2039292  | 0.90  |
| 0.94 | 2726989  | 3086211  | 0.88  |
| 1    | 9230695  | 9230695  | 1.00  |
| 0.98 | 1.23E+07 | 1.35E+07 | 0.91  |
| 0.98 | 1.23E+07 | 1.35E+07 | 0.91  |
| 0.88 | 1282382  | 1331009  | 0.96  |
| 0.97 | 1804865  | 1563985  | 1.15  |
| 0.97 | 2320468  | 2068026  | 1.12  |
| 0.97 | 2320468  | 2068026  | 1.12  |
| 0.85 | 2.30E+08 | 3209482  | 71.66 |
| 0.97 | 7931948  | 7339254  | 1.08  |
| 0.98 | 9187579  | 7272694  | 1.26  |
| 0.99 | 9444136  | 7570257  | 1.25  |
| 1    | 1.33E+07 | 1.04E+07 | 1.28  |
| 0.99 | 2.13E+07 | 1.68E+07 | 1.27  |
| 1    | 3.47E+07 | 2.96E+07 | 1.17  |
| 1    | 4.97E+07 | 4.49E+07 | 1.11  |
| 0.88 | 1534124  | 1232526  | 1.24  |
| 0.97 | 1716461  | 1605911  | 1.07  |
| 0.97 | 1716461  | 1605911  | 1.07  |
| 0.5  | 2871046  | 1740267  | 1.65  |
| 0.9  | 1890691  | 1766624  | 1.07  |
| 0.89 | 2074820  | 2019007  | 1.03  |
| 0.98 | 5646575  | 5549509  | 1.02  |
| 0.97 | 7992054  | 8155508  | 0.98  |
| 0.96 | 8863037  | 9563562  | 0.93  |
| 1    | 1.00E+07 | 9639241  | 1.04  |
| 1    | 1.90E+07 | 1.88E+07 | 1.01  |
| 1    | 2.21E+07 | 2.01E+07 | 1.10  |
| 1    | 2.55E+07 | 2.46E+07 | 1.04  |
| 0.99 | 3.13E+07 | 4.07E+07 | 0.77  |
| 1    | 7.45E+07 | 6.85E+07 | 1.09  |
| 0.97 | 1.11E+08 | 1.17E+08 | 0.95  |
| 1    | 1.74E+08 | 1.60E+08 | 1.09  |
| 0.92 | 1826751  | 1773317  | 1.03  |
| 0.92 | 1955467  | 1995919  | 0.98  |
| 0.83 | 4790933  | 4871560  | 0.98  |
| 0.83 | 4790933  | 4871560  | 0.98  |
| 0.98 | 7961583  | 6421898  | 1.24  |
| 0.84 | 2.17E+07 | 2841661  | 7.64  |
| 0.98 | 6013985  | 6300264  | 0.95  |
| 0.96 | 1816800  | 1333715  | 1.36  |
| 1    | 1869335  | 1946861  | 0.96  |
| 0.98 | 3901145  | 3015124  | 1.29  |
| 0.96 | 4492418  | 3564557  | 1.26  |
| 1    | 3.05E+07 | 2.63E+07 | 1.16  |

|      |          |          |      |
|------|----------|----------|------|
| 0.77 | 3.59E+07 | 2.01E+08 | 0.18 |
| 0.99 | 5746953  | 4746835  | 1.21 |
| 0.99 | 6532260  | 5933852  | 1.10 |
| 0.95 | 2884170  | 2389308  | 1.21 |
| 0.94 | 859514   | 1069613  | 0.80 |
| 0.91 | 2171479  | 4424316  | 0.49 |
| 1    | 1.07E+07 | 1.02E+07 | 1.05 |
| 0.96 | 2694270  | 2648738  | 1.02 |
| 0.94 | 530550   | 417449   | 1.27 |
| 0.98 | 821791   | 718264   | 1.14 |
| 0.97 | 2335569  | 2037541  | 1.15 |
| 0.89 | 5875798  | 5354716  | 1.10 |
| 1    | 7767188  | 7227110  | 1.07 |
| 0.96 | 1.13E+07 | 8876402  | 1.27 |
| 0.99 | 1.79E+07 | 1.63E+07 | 1.10 |
| 0.98 | 734738   | 633903   | 1.16 |
| 0.94 | 1315960  | 1251124  | 1.05 |
| 0.87 | 1834121  | 1749394  | 1.05 |
| 1    | 5659597  | 4749875  | 1.19 |
| 0.89 | 2.14E+07 | 2.27E+07 | 0.94 |
| 0.83 | 7818528  | 2.15E+07 | 0.36 |
| 0.83 | 7818528  | 2.15E+07 | 0.36 |
| 0.98 | 3344559  | 3381708  | 0.99 |
| 0.98 | 3344559  | 3381708  | 0.99 |
| 1    | 2.70E+07 | 2.04E+07 | 1.32 |
| 0.99 | 2806594  | 2511395  | 1.12 |
| 0.97 | 6675992  | 7596395  | 0.88 |
| 0.99 | 1.02E+07 | 1.14E+07 | 0.89 |
| 0.99 | 1.02E+07 | 1.14E+07 | 0.89 |
| 0.91 | 1.17E+07 | 1.31E+07 | 0.89 |
| 0.96 | 3.58E+07 | 2.83E+07 | 1.27 |
| 1    | 6.66E+07 | 5.35E+07 | 1.24 |
| 1    | 6.66E+07 | 5.35E+07 | 1.24 |
| 0.98 | 762661   | 683064   | 1.12 |
| 0.97 | 996277   | 819862   | 1.22 |
| 0.98 | 1730221  | 998437   | 1.73 |
| 0.93 | 1974380  | 1345356  | 1.47 |
| 0.98 | 1532985  | 1464898  | 1.05 |
| 0.98 | 2112069  | 1828804  | 1.15 |
| 0.93 | 5529708  | 6844237  | 0.81 |
| 0.97 | 2.47E+07 | 2.41E+07 | 1.02 |
| 0.99 | 1307852  | 1190343  | 1.10 |
| 0.95 | 5188982  | 5256888  | 0.99 |
| 0.99 | 5734878  | 5593027  | 1.03 |
| 0.97 | 1444854  | 1425432  | 1.01 |
| 0.97 | 1444854  | 1425432  | 1.01 |
| 0.95 | 2495915  | 2242477  | 1.11 |
| 0.98 | 1.19E+07 | 1.06E+07 | 1.12 |
| 0.99 | 1.49E+07 | 1.27E+07 | 1.17 |
| 0.99 | 3.87E+07 | 3.36E+07 | 1.15 |
| 0.94 | 3.93E+07 | 3.48E+07 | 1.13 |

|      |          |          |      |
|------|----------|----------|------|
| 1    | 6.88E+07 | 6.65E+07 | 1.03 |
| 0.84 | 988411   | 729452   | 1.36 |
| 0.8  | 3287658  | 4824091  | 0.68 |
| 0.92 | 1.41E+07 | 1.07E+07 | 1.32 |
| 0.97 | 1.29E+07 | 1.22E+07 | 1.06 |
| 1    | 1.43E+07 | 1.26E+07 | 1.13 |
| 0.99 | 3.08E+07 | 2.94E+07 | 1.05 |
| 0.83 | 8987356  | 7992862  | 1.12 |
| 0.9  | 3254972  | 2901421  | 1.12 |
| 0.88 | 6951519  | 5315108  | 1.31 |
| 0.88 | 6951519  | 5315108  | 1.31 |
| 0.99 | 7664520  | 6572638  | 1.17 |
| 0.99 | 7664520  | 6572638  | 1.17 |
| 0.98 | 1.33E+07 | 1.04E+07 | 1.28 |
| 0.97 | 1.33E+07 | 1.06E+07 | 1.25 |
| 0.88 | 6837963  | 1.14E+07 | 0.60 |
| 0.89 | 1.66E+07 | 1.71E+07 | 0.97 |
| 1    | 2.50E+07 | 2.15E+07 | 1.16 |
| 0.98 | 5.72E+07 | 4.45E+07 | 1.29 |
| 0.99 | 7.41E+07 | 5.82E+07 | 1.27 |
| 1    | 7.82E+07 | 6.50E+07 | 1.20 |
| 0.99 | 1.89E+08 | 1.46E+08 | 1.29 |
| 0.99 | 1.81E+08 | 1.59E+08 | 1.14 |
| 0.99 | 1.81E+08 | 1.59E+08 | 1.14 |
| 0.75 | 1356238  | 1723305  | 0.79 |
| 0.94 | 1974247  | 1876816  | 1.05 |
| 0.94 | 2569269  | 3213379  | 0.80 |
| 0.98 | 5960980  | 5761913  | 1.03 |
| 0.93 | 657739   | 769739   | 0.85 |
| 0.99 | 5498244  | 4837607  | 1.14 |
| 0.97 | 1.36E+07 | 9893002  | 1.37 |
| 0.91 | 5920545  | 5774363  | 1.03 |
| 0.94 | 1.92E+07 | 1.62E+07 | 1.19 |
| 0.97 | 2.21E+07 | 2.08E+07 | 1.06 |
| 0.97 | 3.45E+07 | 3.07E+07 | 1.12 |
| 0.9  | 4698982  | 2873400  | 1.64 |
| 0.92 | 2952037  | 2723409  | 1.08 |
| 0.74 | 2137109  | 1647305  | 1.30 |
| 0.97 | 2608938  | 2179970  | 1.20 |
| 0.73 | 5148225  | 3699293  | 1.39 |
| 0.92 | 2.05E+07 | 2.17E+07 | 0.94 |
| 1    | 5.27E+07 | 5.00E+07 | 1.05 |
| 0.98 | 6.87E+07 | 5.81E+07 | 1.18 |
| 0.99 | 1659508  | 1529723  | 1.08 |
| 1    | 1.24E+07 | 1.04E+07 | 1.19 |
| 1    | 1.24E+07 | 1.04E+07 | 1.19 |
| 0.98 | 4.32E+07 | 3.95E+07 | 1.09 |
| 1    | 1.61E+07 | 1.61E+07 | 1.00 |
| 0.89 | 1.75E+07 | 1.10E+07 | 1.59 |
| 0.93 | 5785604  | 5703437  | 1.01 |
| 0.74 | 1.43E+07 | 2.04E+07 | 0.70 |

|      |          |          |      |
|------|----------|----------|------|
| 0.97 | 2222224  | 2124348  | 1.05 |
| 0.99 | 1.32E+08 | 7.62E+07 | 1.73 |
| 0.99 | 4210468  | 3752817  | 1.12 |
| 0.96 | 1.18E+07 | 1.02E+07 | 1.16 |
| 0.96 | 1.18E+07 | 1.02E+07 | 1.16 |
| 0.34 | 3094081  | 2048290  | 1.51 |
| 0.92 | 6607865  | 4868127  | 1.36 |
| 1    | 6044070  | 5845266  | 1.03 |
| 0.98 | 8415628  | 7573726  | 1.11 |
| 0.99 | 1.49E+07 | 1.35E+07 | 1.10 |
| 0.96 | 1.67E+07 | 1.67E+07 | 1.00 |
| 0.86 | 2.78E+07 | 5.25E+07 | 0.53 |
| 0.96 | 2017171  | 2084131  | 0.97 |
| 0.8  | 8372603  | 3213074  | 2.61 |
| 0.92 | 5413176  | 5662817  | 0.96 |
| 0.94 | 1463533  | 1561536  | 0.94 |
| 0.93 | 2950003  | 2926936  | 1.01 |
| 0.98 | 7076540  | 7263615  | 0.97 |
| 0.82 | 1.51E+07 | 1.28E+07 | 1.18 |
| 0.75 | 9579529  | 1.39E+07 | 0.69 |
| 0.9  | 2520812  | 2123811  | 1.19 |
| 0.95 | 8366684  | 9145410  | 0.91 |
| 0.99 | 1114569  | 1036087  | 1.08 |
| 0.87 | 1.33E+08 | 4.50E+07 | 2.96 |
| 0.99 | 6499550  | 6035540  | 1.08 |
| 0.82 | 1366078  | 1861461  | 0.73 |
| 1    | 1.30E+07 | 1.16E+07 | 1.12 |
| 0.96 | 1078074  | 859883   | 1.25 |
| 0.96 | 1078074  | 859883   | 1.25 |
| 0.8  | 1212161  | 1069039  | 1.13 |
| 0.9  | 3121594  | 2770705  | 1.13 |
| 1    | 4699054  | 3878539  | 1.21 |
| 0.99 | 1.98E+07 | 1.82E+07 | 1.09 |
| 0.99 | 2.62E+07 | 2.39E+07 | 1.10 |
| 0.99 | 2.62E+07 | 2.39E+07 | 1.10 |
| 1    | 6.21E+07 | 4.86E+07 | 1.28 |
| 1    | 6.21E+07 | 4.86E+07 | 1.28 |
| 0.86 | 2047431  | 1638752  | 1.25 |
| 0.94 | 2471304  | 2091035  | 1.18 |
| 0.91 | 2963405  | 3841426  | 0.77 |
| 0.99 | 2.77E+07 | 2.63E+07 | 1.05 |
| 0.98 | 1697391  | 1294483  | 1.31 |
| 0.98 | 1981486  | 1690177  | 1.17 |
| 0.99 | 2284067  | 2165881  | 1.05 |
| 0.98 | 2506450  | 2566621  | 0.98 |
| 0.99 | 2896467  | 2764075  | 1.05 |
| 0.86 | 3300881  | 3497744  | 0.94 |
| 0.99 | 6668767  | 6864210  | 0.97 |
| 0.99 | 7439725  | 7672824  | 0.97 |
| 0.99 | 1.23E+07 | 1.13E+07 | 1.09 |
| 1    | 2.08E+07 | 2.06E+07 | 1.01 |

|      |          |          |      |
|------|----------|----------|------|
| 1    | 2.08E+07 | 2.06E+07 | 1.01 |
| 0.9  | 2981540  | 2617541  | 1.14 |
| 0.99 | 1.71E+07 | 1.59E+07 | 1.08 |
| 0.19 | 2.41E+07 | 2.55E+07 | 0.95 |
| 1    | 1.14E+08 | 9.80E+07 | 1.16 |
| 1    | 1.14E+08 | 9.80E+07 | 1.16 |
| 0.9  | 1094634  | 925983   | 1.18 |
| 0.99 | 3623547  | 3537993  | 1.02 |
| 1    | 3.80E+07 | 4.00E+07 | 0.95 |
| 0.99 | 4.84E+07 | 4.81E+07 | 1.01 |
| 0.83 | 820062   | 823691   | 1.00 |
| 0.98 | 8873577  | 6429113  | 1.38 |
| 0.98 | 3806727  | 4081067  | 0.93 |
| 0.92 | 3022540  | 2253462  | 1.34 |
| 1    | 2.94E+07 | 2.86E+07 | 1.03 |
| 1    | 2.94E+07 | 2.86E+07 | 1.03 |
| 0.99 | 1658998  | 1489900  | 1.11 |
| 0.99 | 1658998  | 1489900  | 1.11 |
| 0.97 | 2973600  | 2841807  | 1.05 |
| 0.97 | 2973600  | 2841807  | 1.05 |
| 0.97 | 2973600  | 2841807  | 1.05 |
| 0.99 | 3681229  | 3421211  | 1.08 |
| 0.88 | 3936684  | 3478562  | 1.13 |
| 0.96 | 681736   | 707369   | 0.96 |
| 0.98 | 1531941  | 1899491  | 0.81 |
| 0.73 | 1408056  | 1183765  | 1.19 |
| 1    | 4.24E+07 | 3.85E+07 | 1.10 |
| 1    | 4.24E+07 | 3.85E+07 | 1.10 |
| 1    | 4.24E+07 | 3.85E+07 | 1.10 |
| 0.97 | 601795   | 504736   | 1.19 |
| 0.96 | 2809133  | 2192939  | 1.28 |
| 0.99 | 1.41E+07 | 1.83E+07 | 0.77 |
| 0.99 | 1.70E+07 | 2.23E+07 | 0.76 |
| 1    | 4.94E+07 | 6.61E+07 | 0.75 |
| 0.97 | 571519   | 659911   | 0.87 |
| 0.97 | 883064   | 845957   | 1.04 |
| 0.98 | 1565452  | 1411491  | 1.11 |
| 0.99 | 1465776  | 1483061  | 0.99 |
| 0.96 | 1716904  | 1957567  | 0.88 |
| 1    | 8475698  | 7431255  | 1.14 |
| 0.99 | 1.14E+07 | 1.00E+07 | 1.14 |
| 1    | 1.89E+07 | 1.68E+07 | 1.13 |
| 0.99 | 6.75E+07 | 6.14E+07 | 1.10 |
| 0.99 | 6.75E+07 | 6.14E+07 | 1.10 |
| 0.82 | 1.17E+08 | 1.13E+08 | 1.04 |
| 0.85 | 1441136  | 1185561  | 1.22 |
| 0.99 | 2682218  | 2091435  | 1.28 |
| 0.79 | 3205888  | 3145056  | 1.02 |
| 0.88 | 3966518  | 3546110  | 1.12 |
| 0.94 | 3995291  | 4267690  | 0.94 |
| 0.87 | 5261680  | 4321181  | 1.22 |

|      |          |          |      |
|------|----------|----------|------|
| 0.87 | 5261680  | 4321181  | 1.22 |
| 0.94 | 1.37E+07 | 1.33E+07 | 1.03 |
| 0.94 | 2473244  | 2590816  | 0.95 |
| 0.98 | 1207476  | 930347   | 1.30 |
| 0.98 | 1207476  | 930347   | 1.30 |
| 0.95 | 2314036  | 1979344  | 1.17 |
| 0.99 | 2569703  | 2345799  | 1.10 |
| 0.99 | 2569703  | 2345799  | 1.10 |
| 0.99 | 2607949  | 2416033  | 1.08 |
| 0.85 | 2832991  | 2666248  | 1.06 |
| 0.99 | 3844965  | 3112315  | 1.24 |
| 0.98 | 4224691  | 4445126  | 0.95 |
| 0.97 | 7806227  | 7048274  | 1.11 |
| 1    | 9649369  | 7983209  | 1.21 |
| 1    | 1.69E+07 | 1.49E+07 | 1.13 |
| 1    | 2.79E+07 | 2.76E+07 | 1.01 |
| 1    | 7.89E+07 | 6.73E+07 | 1.17 |
| 0.94 | 2250595  | 2487664  | 0.90 |
| 0.97 | 3882570  | 4858727  | 0.80 |
| 1    | 2.89E+07 | 2.96E+07 | 0.98 |
| 0.98 | 1772156  | 1461389  | 1.21 |
| 0.85 | 3488101  | 2494943  | 1.40 |
| 0.96 | 2.13E+07 | 2.66E+07 | 0.80 |
| 0.88 | 571089   | 570345   | 1.00 |
| 0.95 | 944742   | 980948   | 0.96 |
| 0.97 | 6443706  | 7635892  | 0.84 |
| 0.97 | 6443706  | 7635892  | 0.84 |
| 0.99 | 906857   | 618314   | 1.47 |
| 0.98 | 3777321  | 2669702  | 1.41 |
| 0.99 | 6206596  | 4683556  | 1.33 |
| 0.92 | 7716865  | 5689616  | 1.36 |
| 0.99 | 8547895  | 6321405  | 1.35 |
| 0.99 | 8547895  | 6321405  | 1.35 |
| 0.97 | 3996576  | 3477368  | 1.15 |
| 0.98 | 1.91E+07 | 1.55E+07 | 1.23 |
| 0.99 | 4.74E+07 | 4.97E+07 | 0.95 |
| 0.99 | 4.74E+07 | 4.97E+07 | 0.95 |
| 0.99 | 5.07E+07 | 5.16E+07 | 0.98 |
| 0.92 | 8.72E+07 | 7.45E+07 | 1.17 |
| 1    | 2.14E+08 | 1.88E+08 | 1.14 |
| 0.98 | 5714855  | 4233140  | 1.35 |
| 0.99 | 8718392  | 8117172  | 1.07 |
| 0.92 | 798302   | 782867   | 1.02 |
| 0.99 | 1.74E+07 | 1.84E+07 | 0.95 |
| 0.99 | 1611100  | 1187136  | 1.36 |
| 0.88 | 3964079  | 3072316  | 1.29 |
| 0.93 | 2.01E+07 | 1.54E+07 | 1.31 |
| 0.98 | 2117283  | 2135959  | 0.99 |
| 0.98 | 2117283  | 2135959  | 0.99 |
| 0.98 | 895030   | 1555622  | 0.58 |
| 0.99 | 2612002  | 3332673  | 0.78 |

|      |          |          |      |
|------|----------|----------|------|
| 0.99 | 2612002  | 3332673  | 0.78 |
| 1    | 4298153  | 5007488  | 0.86 |
| 0.98 | 8311774  | 7184833  | 1.16 |
| 0.93 | 3442743  | 7194258  | 0.48 |
| 0.98 | 1.78E+07 | 1.62E+07 | 1.10 |
| 0.92 | 2138125  | 1884244  | 1.13 |
| 0.96 | 1855003  | 1965518  | 0.94 |
| 0.96 | 1855003  | 1965518  | 0.94 |
| 0.99 | 1.06E+07 | 9426105  | 1.12 |
| 0.98 | 1.53E+07 | 9957659  | 1.54 |
| 1    | 2.22E+07 | 1.74E+07 | 1.28 |
| 0.88 | 2679383  | 2615060  | 1.02 |
| 0.94 | 2913913  | 2669458  | 1.09 |
| 0.98 | 3227970  | 3780620  | 0.85 |
| 0.99 | 2.05E+07 | 2.15E+07 | 0.95 |
| 0.97 | 1852169  | 1840747  | 1.01 |
| 0.93 | 5873647  | 5440030  | 1.08 |
| 0.97 | 1.37E+07 | 1.27E+07 | 1.08 |
| 0.93 | 1.53E+07 | 2.02E+07 | 0.76 |
| 0.92 | 1547241  | 1054224  | 1.47 |
| 0.97 | 1463374  | 1238695  | 1.18 |
| 0.96 | 2036089  | 1709991  | 1.19 |
| 0.97 | 2727080  | 3140437  | 0.87 |
| 0.97 | 2727080  | 3140437  | 0.87 |
| 0.99 | 1.03E+07 | 9714016  | 1.06 |
| 0.87 | 1.52E+07 | 1.14E+07 | 1.33 |
| 0.99 | 1.29E+07 | 1.19E+07 | 1.08 |
| 1    | 2.30E+07 | 1.99E+07 | 1.16 |
| 0.93 | 2973543  | 2587179  | 1.15 |
| 0.92 | 1513335  | 710756   | 2.13 |
| 0.95 | 582808   | 647229   | 0.90 |
| 0.98 | 741213   | 684537   | 1.08 |
| 0.98 | 741213   | 684537   | 1.08 |
| 0.98 | 3378426  | 2681309  | 1.26 |
| 0.96 | 3160701  | 2931420  | 1.08 |
| 0.96 | 3160701  | 2931420  | 1.08 |
| 0.93 | 4215392  | 3161350  | 1.33 |
| 0.94 | 3142577  | 3205236  | 0.98 |
| 0.97 | 4430650  | 3234138  | 1.37 |
| 0.98 | 5351275  | 5186884  | 1.03 |
| 0.98 | 9660942  | 1.00E+07 | 0.97 |
| 0.98 | 2986900  | 3059127  | 0.98 |
| 0.92 | 1031303  | 885735   | 1.16 |
| 0.96 | 3065882  | 2785979  | 1.10 |
| 1    | 8648188  | 8216205  | 1.05 |
| 0.99 | 3488320  | 3272553  | 1.07 |
| 0.98 | 1635481  | 970631   | 1.68 |
| 0.96 | 2572676  | 2595768  | 0.99 |
| 0.99 | 2.61E+07 | 2.01E+07 | 1.30 |
| 0.98 | 1639709  | 1577206  | 1.04 |
| 0.98 | 2474389  | 2416393  | 1.02 |



|      |          |          |      |
|------|----------|----------|------|
| 0.94 | 4654250  | 4180746  | 1.11 |
| 0.94 | 4654250  | 4180746  | 1.11 |
| 0.99 | 6126193  | 5624664  | 1.09 |
| 1    | 6496817  | 5984483  | 1.09 |
| 1    | 6496817  | 5984483  | 1.09 |
| 1    | 7689835  | 7626350  | 1.01 |
| 0.98 | 1.04E+07 | 9188792  | 1.13 |
| 0.99 | 1.78E+07 | 1.38E+07 | 1.29 |
| 0.83 | 1231842  | 816653   | 1.51 |
| 0.93 | 1228400  | 1047464  | 1.17 |
| 0.98 | 1370512  | 1140793  | 1.20 |
| 0.99 | 9263182  | 9367168  | 0.99 |
| 1    | 9.17E+07 | 9.14E+07 | 1.00 |
| 1    | 1.96E+08 | 1.62E+08 | 1.21 |
| 1    | 1.96E+08 | 1.62E+08 | 1.21 |
| 0.99 | 3365097  | 3035165  | 1.11 |
| 0.99 | 4894146  | 4338421  | 1.13 |
| 0.99 | 5619173  | 5004341  | 1.12 |
| 0.92 | 6247392  | 8403359  | 0.74 |
| 0.96 | 1.40E+07 | 1.43E+07 | 0.98 |
| 0.96 | 1.40E+07 | 1.43E+07 | 0.98 |
| 1    | 1.89E+07 | 1.85E+07 | 1.02 |
| 1    | 1.89E+07 | 1.85E+07 | 1.02 |
| 1    | 3.31E+07 | 3.21E+07 | 1.03 |
| 1    | 3.31E+07 | 3.21E+07 | 1.03 |
| 1    | 3.31E+07 | 3.21E+07 | 1.03 |
| 1    | 3.36E+07 | 3.34E+07 | 1.01 |
| 0.95 | 703033   | 675402   | 1.04 |
| 0.97 | 830443   | 727521   | 1.14 |
| 0.86 | 5250171  | 6459897  | 0.81 |
| 0.99 | 962745   | 1016280  | 0.95 |
| 0.87 | 1199844  | 1260430  | 0.95 |
| 0.98 | 3036092  | 3041874  | 1.00 |
| 0.94 | 2.32E+07 | 2.78E+07 | 0.83 |
| 0.94 | 2.73E+07 | 2.91E+07 | 0.94 |
| 0.96 | 1755333  | 1409217  | 1.25 |
| 0.88 | 727518   | 742827   | 0.98 |
| 0.97 | 1278256  | 1324514  | 0.97 |
| 0.98 | 1546105  | 1500892  | 1.03 |
| 0.96 | 1779380  | 1680747  | 1.06 |
| 0.96 | 1638841  | 1682669  | 0.97 |
| 0.98 | 3290934  | 3505521  | 0.94 |
| 0.99 | 4627900  | 4284075  | 1.08 |
| 0.99 | 5454512  | 4448533  | 1.23 |
| 0.95 | 758682   | 677443   | 1.12 |
| 0.99 | 1398071  | 1017289  | 1.37 |
| 0.99 | 5908629  | 4924507  | 1.20 |
| 0.94 | 4161670  | 4936899  | 0.84 |
| 0.94 | 4161670  | 4936899  | 0.84 |
| 0.85 | 492782   | 1405602  | 0.35 |
| 0.95 | 751752   | 2041983  | 0.37 |

|      |          |          |      |
|------|----------|----------|------|
| 0.96 | 1084677  | 3411530  | 0.32 |
| 0.97 | 1965667  | 6208419  | 0.32 |
| 0.98 | 1.10E+07 | 1.20E+07 | 0.92 |
| 0.98 | 1.10E+07 | 1.20E+07 | 0.92 |
| 0.95 | 1542483  | 1910986  | 0.81 |
| 0.99 | 3875164  | 3278901  | 1.18 |
| 0.98 | 4097713  | 4184555  | 0.98 |
| 0.88 | 3692529  | 5835530  | 0.63 |
| 0.36 | 3988737  | 1171207  | 3.41 |
| 0.96 | 1426650  | 1175674  | 1.21 |
| 0.97 | 9455534  | 8089079  | 1.17 |
| 0.97 | 9455534  | 8089079  | 1.17 |
| 1    | 8283408  | 8887383  | 0.93 |
| 0.95 | 1.94E+07 | 1.22E+07 | 1.59 |
| 1    | 1.48E+07 | 1.49E+07 | 0.99 |
| 1    | 8.00E+07 | 8.51E+07 | 0.94 |
| 0.96 | 2576269  | 2077180  | 1.24 |
| 0.97 | 1958356  | 2270936  | 0.86 |
| 0.95 | 4744777  | 4043983  | 1.17 |
| 0.99 | 9166691  | 7647135  | 1.20 |
| 0.99 | 9166691  | 7647135  | 1.20 |
| 0.99 | 9488269  | 9092923  | 1.04 |
| 0.74 | 8673195  | 9768491  | 0.89 |
| 0.95 | 1.08E+07 | 9769559  | 1.11 |
| 0.97 | 1.27E+07 | 1.07E+07 | 1.19 |
| 0.97 | 1.27E+07 | 1.14E+07 | 1.11 |
| 0.91 | 1.33E+07 | 1.27E+07 | 1.05 |
| 0.91 | 1.33E+07 | 1.27E+07 | 1.05 |
| 0.92 | 1.11E+07 | 1.32E+07 | 0.84 |
| 0.98 | 1.51E+07 | 1.33E+07 | 1.14 |
| 0.99 | 1.76E+07 | 1.67E+07 | 1.05 |
| 0.98 | 1.89E+07 | 1.74E+07 | 1.09 |
| 0.99 | 2.43E+07 | 1.90E+07 | 1.28 |
| 0.99 | 9143787  | 8270924  | 1.11 |
| 0.99 | 9143787  | 8270924  | 1.11 |
| 0.96 | 456590   | 401552   | 1.14 |
| 0.96 | 456590   | 401552   | 1.14 |
| 0.94 | 3326507  | 2959762  | 1.12 |
| 0.82 | 3191805  | 3517760  | 0.91 |
| 0.98 | 4523478  | 4627557  | 0.98 |
| 0.99 | 1277334  | 1053765  | 1.21 |
| 0.97 | 1027597  | 1096750  | 0.94 |
| 0.74 | 731535   | 778641   | 0.94 |
| 0.98 | 1558116  | 1144165  | 1.36 |
| 0.91 | 877341   | 782718   | 1.12 |
| 0.87 | 5098462  | 7662148  | 0.67 |
| 0.87 | 5098462  | 7662148  | 0.67 |
| 0.99 | 1.80E+07 | 1.72E+07 | 1.05 |
| 0.99 | 1154138  | 1029172  | 1.12 |
| 0.94 | 1.58E+07 | 1.07E+07 | 1.48 |
| 0.94 | 1.58E+07 | 1.07E+07 | 1.48 |

|      |          |          |      |
|------|----------|----------|------|
| 0.91 | 1018153  | 1210786  | 0.84 |
| 0.97 | 2068825  | 2138232  | 0.97 |
| 1    | 3334417  | 3972669  | 0.84 |
| 1    | 1.83E+07 | 1.47E+07 | 1.24 |
| 0.95 | 812233   | 802914   | 1.01 |
| 0.99 | 6633179  | 5726732  | 1.16 |
| 0.9  | 485174   | 489512   | 0.99 |
| 0.92 | 8412504  | 9462300  | 0.89 |
| 0.93 | 2044280  | 1646785  | 1.24 |
| 0.87 | 4.43E+08 | 8.30E+07 | 5.34 |
| 1    | 1794278  | 1794278  | 1.00 |
| 0.95 | 1.05E+07 | 7984081  | 1.32 |
| 1    | 1.71E+07 | 1.44E+07 | 1.19 |
| 1    | 1.71E+07 | 1.44E+07 | 1.19 |
| 0.99 | 2.43E+07 | 1.97E+07 | 1.23 |
| 0.97 | 5253081  | 2600978  | 2.02 |
| 0.81 | 2642346  | 2263542  | 1.17 |
| 0.96 | 3905311  | 3006272  | 1.30 |
| 0.96 | 5262657  | 5056397  | 1.04 |
| 0.86 | 5966105  | 5770920  | 1.03 |
| 0.86 | 5966105  | 5770920  | 1.03 |
| 0.97 | 8774607  | 6677663  | 1.31 |
| 0.97 | 8774607  | 6677663  | 1.31 |
| 0.97 | 8774607  | 6677663  | 1.31 |
| 0.78 | 1.06E+07 | 6876795  | 1.54 |
| 0.95 | 1.37E+07 | 1.32E+07 | 1.04 |
| 0.99 | 1.08E+08 | 9.53E+07 | 1.13 |
| 0.99 | 1211558  | 995731   | 1.22 |
| 0.99 | 1712452  | 1515372  | 1.13 |
| 0.91 | 1484114  | 1543889  | 0.96 |
| 0.99 | 2758886  | 2643748  | 1.04 |
| 0.99 | 8252346  | 7017835  | 1.18 |
| 0.99 | 9318791  | 7570916  | 1.23 |
| 1    | 1.14E+07 | 1.01E+07 | 1.13 |
| 0.99 | 1.02E+07 | 1.02E+07 | 1.00 |
| 0.99 | 3470583  | 3274017  | 1.06 |
| 0.99 | 6727676  | 6283126  | 1.07 |
| 0.99 | 5526705  | 4663738  | 1.19 |
| 0.99 | 5526705  | 4663738  | 1.19 |
| 0.87 | 8207424  | 1.08E+07 | 0.76 |
| 0.98 | 6834792  | 7508415  | 0.91 |
| 0.97 | 1.12E+07 | 1.23E+07 | 0.91 |
| 0.98 | 1.06E+07 | 1.51E+07 | 0.70 |
| 0.89 | 1.89E+07 | 1.76E+07 | 1.07 |
| 0.96 | 1.92E+07 | 1.94E+07 | 0.99 |
| 0.98 | 1.47E+07 | 1.48E+07 | 0.99 |
| 0.96 | 772204   | 800340   | 0.96 |
| 0.88 | 5432994  | 5818354  | 0.93 |
| 0.74 | 4198404  | 1.25E+07 | 0.34 |
| 0.98 | 1879457  | 1991241  | 0.94 |
| 1    | 8.43E+07 | 8.52E+07 | 0.99 |

|      |          |          |      |
|------|----------|----------|------|
| 0.98 | 1.01E+07 | 9339610  | 1.08 |
| 0.89 | 445776   | 499021   | 0.89 |
| 0.99 | 4838861  | 4159100  | 1.16 |
| 0.99 | 1.56E+07 | 1.33E+07 | 1.17 |
| 0.99 | 1.56E+07 | 1.33E+07 | 1.17 |
| 0.97 | 913214   | 830543   | 1.10 |
| 0.95 | 1217653  | 1051310  | 1.16 |
| 0.95 | 1217653  | 1051310  | 1.16 |
| 0.96 | 2252046  | 2507641  | 0.90 |
| 0.98 | 1.85E+07 | 1.82E+07 | 1.02 |
| 0.99 | 4.34E+07 | 4.14E+07 | 1.05 |
| 0.9  | 5548587  | 5398743  | 1.03 |
| 0.91 | 8041290  | 6776253  | 1.19 |
| 0.84 | 9996894  | 7589795  | 1.32 |
| 0.98 | 2.13E+07 | 1.77E+07 | 1.20 |
| 0.99 | 1.04E+08 | 8.94E+07 | 1.16 |
| 0.98 | 2000231  | 1812438  | 1.10 |
| 0.99 | 7799773  | 7235305  | 1.08 |
| 0.98 | 3786176  | 5933569  | 0.64 |
| 0.98 | 3786176  | 5933569  | 0.64 |
| 0.76 | 5153731  | 4986369  | 1.03 |
| 0.76 | 5153731  | 4986369  | 1.03 |
| 0.95 | 8493607  | 8644540  | 0.98 |
| 0.99 | 6.44E+07 | 6.62E+07 | 0.97 |
| 0.89 | 581631   | 442689   | 1.31 |
| 0.99 | 940805   | 882191   | 1.07 |
| 0.99 | 1348569  | 1237232  | 1.09 |
| 0.77 | 4775473  | 3047522  | 1.57 |
| 0.96 | 4738927  | 4913978  | 0.96 |
| 1    | 1371080  | 1109927  | 1.24 |
| 0.96 | 2644610  | 1711630  | 1.55 |
| 0.86 | 3175943  | 1946385  | 1.63 |
| 0.99 | 9084626  | 6535804  | 1.39 |
| 0.98 | 1.35E+07 | 1.09E+07 | 1.24 |
| 1    | 2.30E+07 | 1.90E+07 | 1.21 |
| 0.98 | 4.39E+07 | 3.57E+07 | 1.23 |
| 0.97 | 7466278  | 7391685  | 1.01 |
| 0.94 | 7419073  | 8400184  | 0.88 |
| 0.99 | 1.20E+07 | 1.04E+07 | 1.15 |
| 0.99 | 1.20E+07 | 1.04E+07 | 1.15 |
| 0.98 | 1971684  | 1627580  | 1.21 |
| 0.99 | 7208178  | 5924658  | 1.22 |
| 0.96 | 8476345  | 8070823  | 1.05 |
| 0.96 | 690760   | 666644   | 1.04 |
| 0.98 | 3521388  | 3140954  | 1.12 |
| 1    | 1.84E+07 | 1.56E+07 | 1.18 |
| 1    | 1.84E+07 | 1.56E+07 | 1.18 |
| 0.8  | 4001327  | 3492371  | 1.15 |
| 0.81 | 4.05E+07 | 3.72E+07 | 1.09 |
| 0.99 | 1343163  | 1642244  | 0.82 |
| 0.96 | 1675778  | 1802821  | 0.93 |

|      |          |          |      |
|------|----------|----------|------|
| 0.99 | 3010311  | 2714708  | 1.11 |
| 0.98 | 2845332  | 3527691  | 0.81 |
| 0.67 | 2566997  | 4444035  | 0.58 |
| 0.98 | 4599954  | 5061517  | 0.91 |
| 0.97 | 1.14E+07 | 1.13E+07 | 1.01 |
| 1    | 1.45E+08 | 1.56E+08 | 0.93 |
| 0.97 | 1026580  | 986984   | 1.04 |
| 0.77 | 3514461  | 3239184  | 1.08 |
| 0.8  | 700775   | 382057   | 1.83 |
| 0.95 | 2.36E+07 | 2.36E+07 | 1.00 |
| 0.93 | 1203492  | 970187   | 1.24 |
| 0.93 | 1203492  | 970187   | 1.24 |
| 0.97 | 8423390  | 7623436  | 1.10 |
| 0.94 | 1.23E+07 | 9294980  | 1.32 |
| 0.91 | 9508095  | 9584993  | 0.99 |
| 0.98 | 1.19E+07 | 9883420  | 1.20 |
| 0.98 | 1.59E+07 | 1.14E+07 | 1.39 |
| 0.87 | 1.09E+08 | 9.15E+07 | 1.19 |
| 0.47 | 3360919  | 1930216  | 1.74 |
| 0.97 | 1092771  | 1389536  | 0.79 |
| 0.98 | 5049338  | 4331532  | 1.17 |
| 0.97 | 6009361  | 4698851  | 1.28 |
| 0.98 | 1.49E+07 | 1.58E+07 | 0.94 |
| 0.93 | 693540   | 1048449  | 0.66 |
| 0.94 | 2250595  | 2487664  | 0.90 |
| 0.98 | 2078853  | 3224028  | 0.64 |
| 0.97 | 3882570  | 4858727  | 0.80 |
| 0.98 | 6834792  | 7508415  | 0.91 |
| 0.98 | 1.06E+07 | 1.51E+07 | 0.70 |
| 1    | 2.89E+07 | 2.96E+07 | 0.98 |
| 0.99 | 4.98E+07 | 1.05E+08 | 0.47 |
| 0.99 | 2574811  | 2552874  | 1.01 |
| 0.98 | 4354271  | 3826265  | 1.14 |
| 0.98 | 4354271  | 3826265  | 1.14 |
| 0.85 | 4567089  | 3627067  | 1.26 |
| 0.93 | 8188790  | 6348766  | 1.29 |
| 1    | 1.13E+08 | 9.63E+07 | 1.17 |
| 1    | 1.13E+08 | 9.63E+07 | 1.17 |
| 1    | 1.13E+08 | 9.63E+07 | 1.17 |
| 0.52 | 7294424  | 2123995  | 3.43 |
| 1    | 8984848  | 7915994  | 1.14 |
| 0.95 | 2158297  | 1710205  | 1.26 |
| 0.96 | 1231018  | 1013621  | 1.21 |
| 0.96 | 1984099  | 1607047  | 1.23 |
| 0.96 | 1984099  | 1607047  | 1.23 |
| 0.99 | 1.59E+07 | 1.50E+07 | 1.06 |
| 0.99 | 1.59E+07 | 1.50E+07 | 1.06 |
| 0.87 | 1.54E+07 | 1.91E+07 | 0.81 |
| 0.71 | 572569   | 264121   | 2.17 |
| 0.93 | 1326895  | 1398090  | 0.95 |
| 0.93 | 1326895  | 1398090  | 0.95 |

|      |          |          |      |
|------|----------|----------|------|
| 0.92 | 1496967  | 1616711  | 0.93 |
| 0.8  | 2138086  | 2167038  | 0.99 |
| 0.97 | 9878891  | 7939094  | 1.24 |
| 0.97 | 2844218  | 4086278  | 0.70 |
| 0.97 | 2844218  | 4086278  | 0.70 |
| 0.99 | 1909611  | 1647407  | 1.16 |
| 0.99 | 1909611  | 1647407  | 1.16 |
| 0.98 | 1712174  | 2073930  | 0.83 |
| 0.98 | 1712174  | 2073930  | 0.83 |
| 0.99 | 5114681  | 5896543  | 0.87 |
| 0.92 | 3113024  | 3328439  | 0.94 |
| 0.91 | 4338813  | 4414665  | 0.98 |
| 1    | 2.94E+07 | 2.67E+07 | 1.10 |
| 0.75 | 1416027  | 3906927  | 0.36 |
| 1    | 1.32E+08 | 1.28E+08 | 1.03 |
| 0.98 | 8552434  | 1.10E+07 | 0.78 |
| 0.91 | 1118787  | 1464991  | 0.76 |
| 0.84 | 3200518  | 3534381  | 0.91 |
| 0.93 | 6891394  | 7371748  | 0.93 |
| 0.99 | 2006152  | 1881479  | 1.07 |
| 0.86 | 4346527  | 3629604  | 1.20 |
| 0.85 | 9686243  | 7350859  | 1.32 |
| 1    | 1.47E+07 | 1.31E+07 | 1.12 |
| 0.94 | 1.19E+07 | 1.32E+07 | 0.90 |
| 1    | 2.96E+07 | 2.75E+07 | 1.08 |
| 1    | 8312475  | 8207358  | 1.01 |
| 0.93 | 2058223  | 1140086  | 1.81 |
| 0.93 | 2058223  | 1140086  | 1.81 |
| 0.93 | 2058223  | 1140086  | 1.81 |
| 0.94 | 2541897  | 1825397  | 1.39 |
| 0.81 | 2345879  | 1873280  | 1.25 |
| 0.98 | 5516348  | 4213361  | 1.31 |
| 0.98 | 8544750  | 7336048  | 1.16 |
| 0.98 | 8544750  | 7336048  | 1.16 |
| 0.99 | 5668021  | 5646786  | 1.00 |
| 0.92 | 5024570  | 2692949  | 1.87 |
| 0.92 | 7195606  | 6821355  | 1.05 |
| 0.99 | 7102285  | 7306562  | 0.97 |
| 0.99 | 2178158  | 1707265  | 1.28 |
| 0.96 | 2953962  | 2815832  | 1.05 |
| 1    | 3356711  | 3209287  | 1.05 |
| 1    | 2.36E+07 | 2.09E+07 | 1.13 |
| 0.92 | 805032   | 731457   | 1.10 |
| 0.91 | 273703   | 241580   | 1.13 |
| 0.94 | 580825   | 481672   | 1.21 |
| 0.96 | 9105822  | 7205176  | 1.26 |
| 0.98 | 9961698  | 9471341  | 1.05 |
| 0.85 | 8919976  | 9883125  | 0.90 |
| 0.99 | 1.11E+07 | 1.00E+07 | 1.11 |
| 0.98 | 1.50E+07 | 1.62E+07 | 0.93 |
| 0.98 | 1.50E+07 | 1.62E+07 | 0.93 |

|      |          |          |      |
|------|----------|----------|------|
| 1    | 4.05E+07 | 3.62E+07 | 1.12 |
| 0.99 | 4.36E+07 | 3.69E+07 | 1.18 |
| 0.97 | 5.06E+07 | 4.76E+07 | 1.06 |
| 1    | 9.17E+07 | 8.69E+07 | 1.06 |
| 0.87 | 999359   | 732453   | 1.36 |
| 0.94 | 1.48E+07 | 1.33E+07 | 1.11 |
| 0.9  | 528738   | 680632   | 0.78 |
| 0.78 | 3374803  | 2286726  | 1.48 |
| 0.92 | 2.95E+07 | 8.08E+07 | 0.37 |
| 0.99 | 2473727  | 2705131  | 0.91 |
| 0.96 | 1912166  | 1962112  | 0.97 |
| 0.81 | 8423864  | 7510747  | 1.12 |
| 0.81 | 8423864  | 7510747  | 1.12 |
| 0.99 | 1.66E+07 | 1.29E+07 | 1.29 |
| 0.97 | 1.09E+07 | 1.40E+07 | 0.78 |
| 0.84 | 1481720  | 1365691  | 1.08 |
| 0.89 | 1439862  | 1677653  | 0.86 |
| 0.94 | 1656121  | 1728781  | 0.96 |
| 0.87 | 7655500  | 4698978  | 1.63 |
| 1    | 5448390  | 5433809  | 1.00 |
| 0.98 | 7151517  | 6648703  | 1.08 |
| 1    | 1.55E+07 | 1.50E+07 | 1.03 |
| 0.9  | 1.54E+07 | 1.52E+07 | 1.01 |
| 0.95 | 1.64E+07 | 2.02E+07 | 0.81 |
| 0.89 | 4535165  | 3026722  | 1.50 |
| 0.89 | 4535165  | 3026722  | 1.50 |
| 0.89 | 4535165  | 3026722  | 1.50 |
| 0.93 | 3007026  | 4442318  | 0.68 |
| 0.97 | 2.83E+07 | 3.20E+07 | 0.88 |
| 0.97 | 2.83E+07 | 3.20E+07 | 0.88 |
| 0.99 | 5.57E+07 | 4.57E+07 | 1.22 |
| 0.98 | 8086342  | 7550830  | 1.07 |
| 0.9  | 2293233  | 1893633  | 1.21 |
| 0.73 | 8373412  | 3110204  | 2.69 |
| 0.99 | 8883863  | 8861631  | 1.00 |
| 0.99 | 1154138  | 1029172  | 1.12 |
| 0.93 | 1890903  | 1790622  | 1.06 |
| 0.99 | 8378607  | 7280544  | 1.15 |
| 0.97 | 1.43E+07 | 1.08E+07 | 1.32 |
| 0.98 | 6125919  | 3500986  | 1.75 |
| 0.98 | 6125919  | 3500986  | 1.75 |
| 0.99 | 7850464  | 5418948  | 1.45 |
| 0.99 | 8397595  | 5839058  | 1.44 |
| 0.94 | 9485281  | 7888903  | 1.20 |
| 0.98 | 3453200  | 3792190  | 0.91 |
| 0.75 | 1.22E+07 | 1.69E+07 | 0.72 |
| 0.99 | 4415051  | 3776929  | 1.17 |
| 0.93 | 1072692  | 918528   | 1.17 |
| 0.99 | 8891909  | 7896500  | 1.13 |
| 0.94 | 1484230  | 1437910  | 1.03 |
| 0.91 | 2673895  | 2966419  | 0.90 |

|      |          |          |      |
|------|----------|----------|------|
| 0.98 | 3215007  | 3000790  | 1.07 |
| 0.98 | 3474377  | 3414083  | 1.02 |
| 0.89 | 5674694  | 6659170  | 0.85 |
| 0.94 | 1620936  | 1312910  | 1.23 |
| 0.93 | 2724570  | 2482665  | 1.10 |
| 0.97 | 1.54E+07 | 1.77E+07 | 0.87 |
| 1    | 2.60E+08 | 2.18E+08 | 1.19 |
| 0.49 | 1425305  | 1020667  | 1.40 |
| 0.98 | 2356582  | 2324144  | 1.01 |
| 1    | 2932174  | 2943388  | 1.00 |
| 0.97 | 2927551  | 3335376  | 0.88 |
| 1    | 1.05E+07 | 9849605  | 1.07 |
| 1    | 1.05E+07 | 9849605  | 1.07 |
| 0.99 | 2.83E+07 | 2.81E+07 | 1.01 |
| 0.99 | 2.83E+07 | 2.81E+07 | 1.01 |
| 0.99 | 2.18E+08 | 1.96E+08 | 1.11 |
| 0.98 | 974022   | 1801073  | 0.54 |
| 0.93 | 5528171  | 5475348  | 1.01 |
| 0.9  | 2647441  | 2272548  | 1.16 |
| 0.93 | 3634784  | 2663165  | 1.36 |
| 0.79 | 4105830  | 4894873  | 0.84 |
| 0.98 | 6045391  | 6753256  | 0.90 |
| 0.95 | 4744777  | 4043983  | 1.17 |
| 0.99 | 9166691  | 7647135  | 1.20 |
| 0.99 | 9166691  | 7647135  | 1.20 |
| 0.95 | 1.08E+07 | 9769559  | 1.11 |
| 0.97 | 1.27E+07 | 1.07E+07 | 1.19 |
| 0.97 | 1.27E+07 | 1.14E+07 | 1.11 |
| 0.97 | 1.34E+07 | 1.18E+07 | 1.14 |
| 0.91 | 1.33E+07 | 1.27E+07 | 1.05 |
| 0.91 | 1.33E+07 | 1.27E+07 | 1.05 |
| 0.99 | 1.76E+07 | 1.67E+07 | 1.05 |
| 0.98 | 1.89E+07 | 1.74E+07 | 1.09 |
| 0.99 | 2.43E+07 | 1.90E+07 | 1.28 |
| 1    | 1.43E+07 | 1.42E+07 | 1.01 |
| 0.88 | 1.19E+07 | 1.05E+07 | 1.13 |
| 0.95 | 3094424  | 2670025  | 1.16 |
| 0.97 | 598383   | 646834   | 0.93 |
| 0.72 | 9095780  | 1.20E+07 | 0.76 |
| 0.86 | 6547502  | 5921295  | 1.11 |
| 0.98 | 8144120  | 7985958  | 1.02 |
| 0.93 | 2714247  | 2414557  | 1.12 |
| 0.8  | 3893922  | 3678791  | 1.06 |
| 0.86 | 3959550  | 3686454  | 1.07 |
| 0.96 | 6744538  | 6258697  | 1.08 |
| 0.99 | 7080668  | 6956453  | 1.02 |
| 0.25 | 1479864  | 9383068  | 0.16 |
| 0.8  | 1.36E+07 | 1.38E+07 | 0.99 |
| 0.64 | 1.29E+07 | 1.70E+07 | 0.76 |
| 1    | 2.21E+07 | 2.26E+07 | 0.98 |
| 0.36 | 3.45E+07 | 3.61E+07 | 0.96 |



|      |          |          |       |
|------|----------|----------|-------|
| 0.22 | 3.72E+07 | 4.18E+07 | 0.89  |
| 0.24 | 2.75E+07 | 4.30E+07 | 0.64  |
| 0.64 | 7.67E+07 | 8.08E+07 | 0.95  |
| 0.17 | 5.20E+07 | 8.14E+07 | 0.64  |
| 0.82 | 1.17E+08 | 1.13E+08 | 1.04  |
| 0.13 | 8.09E+07 | 1.20E+08 | 0.67  |
| 0.38 | 2.13E+08 | 2.30E+08 | 0.93  |
| 1    | 3.49E+07 | 3.09E+07 | 1.13  |
| 0.96 | 1.35E+07 | 7959768  | 1.70  |
| 1    | 1.08E+07 | 1.01E+07 | 1.07  |
| 1    | 1.08E+07 | 1.01E+07 | 1.07  |
| 0.97 | 1944486  | 1727806  | 1.13  |
| 0.87 | 2953859  | 1850624  | 1.60  |
| 0.9  | 2542638  | 3591532  | 0.71  |
| 0.99 | 1.21E+07 | 1.07E+07 | 1.13  |
| 0.72 | 7647064  | 1.28E+07 | 0.60  |
| 0.96 | 3593184  | 3370874  | 1.07  |
| 0.99 | 2.08E+07 | 1.88E+07 | 1.11  |
| 0.94 | 1347626  | 1157724  | 1.16  |
| 0.98 | 1615935  | 1827973  | 0.88  |
| 1    | 1.38E+07 | 1.82E+07 | 0.76  |
| 0.99 | 7176981  | 6777928  | 1.06  |
| 1    | 2.02E+07 | 1.63E+07 | 1.24  |
| 1    | 2.02E+07 | 1.63E+07 | 1.24  |
| 1    | 2.30E+07 | 1.79E+07 | 1.28  |
| 0.98 | 5717356  | 8605832  | 0.66  |
| 0.99 | 1.07E+07 | 8627803  | 1.24  |
| 1    | 5.32E+07 | 4.30E+07 | 1.24  |
| 0.97 | 1468503  | 1365435  | 1.08  |
| 0.97 | 2830155  | 3763860  | 0.75  |
| 1    | 8715437  | 8469032  | 1.03  |
| 0.98 | 5714175  | 4530300  | 1.26  |
| 0.85 | 1.08E+07 | 9283604  | 1.16  |
| 0.93 | 901239   | 697872   | 1.29  |
| 0.93 | 901239   | 697872   | 1.29  |
| 1    | 1.09E+07 | 8979771  | 1.21  |
| 1    | 3.27E+07 | 3.24E+07 | 1.01  |
| 0.89 | 3113752  | 3476284  | 0.90  |
| 0.96 | 8993790  | 9152147  | 0.98  |
| 0.93 | 866326   | 862382   | 1.00  |
| 0.9  | 3433700  | 1460925  | 2.35  |
| 0.98 | 2348346  | 1867999  | 1.26  |
| 0.99 | 2234029  | 2034047  | 1.10  |
| 0.97 | 671053   | 648568   | 1.03  |
| 0.97 | 2087187  | 1776737  | 1.17  |
| 1    | 4673056  | 3946342  | 1.18  |
| 0.97 | 2.23E+07 | 2.35E+07 | 0.95  |
| 0.71 | 2.51E+08 | 9707426  | 25.86 |
| 0.98 | 5592573  | 4118753  | 1.36  |
| 0.91 | 5558477  | 4797346  | 1.16  |
| 0.98 | 6208260  | 5088637  | 1.22  |

|      |          |          |      |
|------|----------|----------|------|
| 0.98 | 6208260  | 5088637  | 1.22 |
| 0.99 | 7760548  | 6943088  | 1.12 |
| 0.99 | 2.01E+07 | 1.83E+07 | 1.10 |
| 0.96 | 567455   | 478151   | 1.19 |
| 0.99 | 2066412  | 1666494  | 1.24 |
| 0.99 | 2.51E+07 | 1.79E+07 | 1.40 |
| 1    | 4.73E+07 | 4.25E+07 | 1.11 |
| 1    | 1521641  | 1518692  | 1.00 |
| 0.98 | 4782475  | 3238623  | 1.48 |
| 0.84 | 4142089  | 3773271  | 1.10 |
| 0.96 | 1671767  | 1602502  | 1.04 |
| 0.96 | 1671767  | 1602502  | 1.04 |
| 0.8  | 1.11E+07 | 7475951  | 1.48 |
| 0.99 | 1.43E+07 | 1.11E+07 | 1.29 |
| 0.98 | 2057415  | 1807472  | 1.14 |
| 0.89 | 2723287  | 3427163  | 0.79 |
| 0.77 | 1231430  | 1129535  | 1.09 |
| 0.92 | 7583222  | 7339371  | 1.03 |
| 0.89 | 451902   | 518544   | 0.87 |
| 0.98 | 2418346  | 2493596  | 0.97 |
| 1    | 1.66E+07 | 1.55E+07 | 1.07 |
| 1    | 1.73E+07 | 1.69E+07 | 1.02 |
| 1    | 2.05E+07 | 1.88E+07 | 1.09 |
| 0.99 | 2916416  | 3172705  | 0.92 |
| 0.99 | 9940832  | 9465691  | 1.05 |
| 0.99 | 1.20E+07 | 1.12E+07 | 1.07 |
| 0.9  | 348410   | 402929   | 0.86 |
| 0.99 | 4421054  | 4058043  | 1.09 |
| 0.97 | 3.85E+07 | 3.19E+07 | 1.21 |
| 0.97 | 3.85E+07 | 3.19E+07 | 1.21 |
| 1    | 7.65E+07 | 7.47E+07 | 1.02 |
| 0.96 | 374499   | 357218   | 1.05 |
| 0.99 | 5.41E+07 | 4.57E+07 | 1.18 |
| 0.98 | 1769023  | 1789276  | 0.99 |
| 0.99 | 7831591  | 8014402  | 0.98 |
| 0.97 | 1994347  | 1608924  | 1.24 |
| 0.89 | 490110   | 599762   | 0.82 |
| 0.82 | 2232144  | 1707396  | 1.31 |
| 0.94 | 2723062  | 2003258  | 1.36 |
| 1    | 7801328  | 7527243  | 1.04 |
| 0.95 | 9941890  | 1.00E+07 | 0.99 |
| 0.97 | 8662988  | 9234862  | 0.94 |
| 0.97 | 8662988  | 9234862  | 0.94 |
| 0.92 | 2683530  | 2686369  | 1.00 |
| 0.98 | 2383169  | 2159178  | 1.10 |
| 0.98 | 2383169  | 2159178  | 1.10 |
| 0.93 | 1713198  | 2118426  | 0.81 |
| 0.8  | 727905   | 1255657  | 0.58 |
| 0.97 | 2437752  | 3001980  | 0.81 |
| 0.87 | 2810626  | 4758540  | 0.59 |
| 0.94 | 3709077  | 2952262  | 1.26 |

|      |          |          |      |
|------|----------|----------|------|
| 0.94 | 3709077  | 2952262  | 1.26 |
| 0.92 | 9146884  | 7200841  | 1.27 |
| 0.92 | 1.69E+07 | 1.49E+07 | 1.13 |
| 0.47 | 675148   | 1152153  | 0.59 |
| 0.98 | 9204752  | 5683168  | 1.62 |
| 0.87 | 1879267  | 1673214  | 1.12 |
| 0.94 | 4440993  | 4306505  | 1.03 |
| 0.96 | 1132759  | 832996   | 1.36 |
| 0.91 | 5722036  | 4162681  | 1.37 |
| 0.96 | 8206198  | 1.05E+07 | 0.78 |
| 0.96 | 8206198  | 1.05E+07 | 0.78 |
| 0.94 | 1.75E+07 | 2.06E+07 | 0.85 |
| 0.94 | 1.75E+07 | 2.06E+07 | 0.85 |
| 1    | 1.87E+07 | 1.59E+07 | 1.18 |
| 0.97 | 3726684  | 3313153  | 1.12 |
| 0.98 | 3540004  | 3599598  | 0.98 |
| 1    | 1.28E+07 | 1.29E+07 | 0.99 |
| 1    | 1.28E+07 | 1.29E+07 | 0.99 |
| 0.99 | 4892234  | 5221748  | 0.94 |
| 0.89 | 2723287  | 3427163  | 0.79 |
| 0.98 | 1.05E+07 | 8277381  | 1.27 |
| 0.96 | 2921038  | 2971460  | 0.98 |
| 0.97 | 1660717  | 1280489  | 1.30 |
| 0.99 | 2552851  | 2167503  | 1.18 |
| 0.98 | 1.05E+07 | 5635597  | 1.86 |
| 0.98 | 2166738  | 1937984  | 1.12 |
| 0.95 | 2946844  | 4996024  | 0.59 |
| 0.99 | 1.06E+07 | 9068038  | 1.17 |
| 1    | 6170520  | 5690985  | 1.08 |
| 0.96 | 5832699  | 6172745  | 0.94 |
| 1    | 1.10E+08 | 1.13E+08 | 0.97 |
| 1    | 1.10E+07 | 1.13E+07 | 0.97 |
| 1    | 1.10E+07 | 1.13E+07 | 0.97 |
| 1    | 1.24E+07 | 1.26E+07 | 0.98 |
| 0.84 | 1028993  | 1189847  | 0.86 |
| 0.98 | 1582339  | 1622515  | 0.98 |
| 0.98 | 2473439  | 2310002  | 1.07 |
| 0.82 | 683571   | 598961   | 1.14 |
| 0.95 | 742071   | 621533   | 1.19 |
| 0.75 | 4471331  | 4376716  | 1.02 |
| 0.99 | 7868240  | 6094067  | 1.29 |
| 0.98 | 5168840  | 3675581  | 1.41 |
| 0.96 | 7121399  | 6489331  | 1.10 |
| 1    | 1.16E+07 | 1.08E+07 | 1.07 |
| 0.98 | 1.55E+07 | 1.35E+07 | 1.15 |
| 0.98 | 1.55E+07 | 1.35E+07 | 1.15 |
| 0.99 | 2.22E+07 | 1.79E+07 | 1.24 |
| 0.99 | 1355811  | 1305816  | 1.04 |
| 0.99 | 1355811  | 1305816  | 1.04 |
| 0.94 | 6037464  | 7098605  | 0.85 |
| 0.99 | 7764554  | 1.35E+07 | 0.58 |

|      |          |          |      |
|------|----------|----------|------|
| 0.97 | 1.30E+07 | 1.70E+07 | 0.76 |
| 0.98 | 2.60E+07 | 4.19E+07 | 0.62 |
| 0.98 | 2.60E+07 | 4.19E+07 | 0.62 |
| 0.96 | 3.51E+07 | 4.37E+07 | 0.80 |
| 0.99 | 4.04E+07 | 5.76E+07 | 0.70 |
| 0.76 | 5.96E+07 | 8.23E+07 | 0.72 |
| 0.76 | 5.96E+07 | 8.23E+07 | 0.72 |
| 0.94 | 8.12E+07 | 8.87E+07 | 0.92 |
| 0.73 | 7.05E+07 | 9.87E+07 | 0.71 |
| 0.98 | 1.63E+08 | 2.03E+08 | 0.80 |
| 0.98 | 1.63E+08 | 2.03E+08 | 0.80 |
| 0.99 | 3852083  | 3133652  | 1.23 |
| 0.96 | 1004494  | 984060   | 1.02 |
| 0.98 | 1393864  | 1428249  | 0.98 |
| 0.97 | 1794185  | 1524753  | 1.18 |
| 0.91 | 2967497  | 2514704  | 1.18 |
| 0.94 | 3257230  | 2552192  | 1.28 |
| 0.84 | 5408175  | 3348270  | 1.62 |
| 0.99 | 4540760  | 4089608  | 1.11 |
| 0.99 | 7060904  | 6908325  | 1.02 |
| 0.99 | 6839660  | 7556367  | 0.91 |
| 1    | 1.03E+07 | 9171218  | 1.12 |
| 0.99 | 1.36E+07 | 1.11E+07 | 1.23 |
| 1    | 1.30E+07 | 1.30E+07 | 1.00 |
| 0.99 | 1.49E+07 | 1.47E+07 | 1.01 |
| 1    | 1.70E+07 | 1.63E+07 | 1.04 |
| 0.99 | 2.03E+07 | 1.69E+07 | 1.20 |
| 0.99 | 2.03E+07 | 1.69E+07 | 1.20 |
| 1    | 2.21E+07 | 2.00E+07 | 1.11 |
| 0.96 | 3.78E+07 | 2.97E+07 | 1.27 |
| 0.97 | 4.77E+07 | 4.25E+07 | 1.12 |
| 0.99 | 2.50E+07 | 5.92E+07 | 0.42 |
| 1    | 8.36E+07 | 8.03E+07 | 1.04 |
| 1    | 8.36E+07 | 8.03E+07 | 1.04 |
| 1    | 8749075  | 8935796  | 0.98 |
| 1    | 3.09E+07 | 2.98E+07 | 1.04 |
| 1    | 2.90E+07 | 3.00E+07 | 0.97 |
| 1    | 3.76E+07 | 3.59E+07 | 1.05 |
| 0.99 | 1.17E+07 | 9303195  | 1.26 |
| 0.98 | 1.26E+07 | 1.07E+07 | 1.18 |
| 0.95 | 888365   | 854752   | 1.04 |
| 0.88 | 255332   | 204032   | 1.25 |
| 0.97 | 2207203  | 2102340  | 1.05 |
| 0.99 | 3968219  | 3697744  | 1.07 |
| 1    | 8749075  | 8935796  | 0.98 |
| 1    | 3.09E+07 | 2.98E+07 | 1.04 |
| 1    | 2.90E+07 | 3.00E+07 | 0.97 |
| 1    | 3.76E+07 | 3.59E+07 | 1.05 |
| 0.65 | 2201657  | 3089363  | 0.71 |
| 0.95 | 7367087  | 6512760  | 1.13 |
| 0.98 | 1.32E+07 | 9578957  | 1.38 |

|      |          |          |      |
|------|----------|----------|------|
| 0.95 | 382608   | 330008   | 1.16 |
| 0.9  | 2390654  | 2648353  | 0.90 |
| 0.96 | 3780684  | 3388233  | 1.12 |
| 1    | 1.53E+07 | 1.49E+07 | 1.03 |
| 1    | 1.53E+07 | 1.49E+07 | 1.03 |
| 0.98 | 2.56E+07 | 2.37E+07 | 1.08 |
| 0.93 | 2782966  | 2531318  | 1.10 |
| 0.97 | 4294041  | 4254373  | 1.01 |
| 0.99 | 2.80E+07 | 2.32E+07 | 1.21 |
| 0.99 | 4377903  | 4458832  | 0.98 |
| 0.93 | 1.06E+07 | 8357197  | 1.27 |
| 0.93 | 1.06E+07 | 8357197  | 1.27 |
| 0.97 | 1.75E+07 | 1.67E+07 | 1.05 |
| 0.93 | 2647888  | 2588580  | 1.02 |
| 0.96 | 1424004  | 1315313  | 1.08 |
| 0.87 | 1.24E+07 | 1520549  | 8.15 |
| 0.9  | 6902844  | 1.33E+07 | 0.52 |
| 0.91 | 1.12E+07 | 9687144  | 1.16 |
| 0.95 | 2076415  | 1569725  | 1.32 |
| 0.95 | 2076415  | 1569725  | 1.32 |
| 0.98 | 2350295  | 2179006  | 1.08 |
| 1    | 4051608  | 3476416  | 1.17 |
| 0.99 | 1.13E+07 | 9711359  | 1.16 |
| 1    | 1.31E+07 | 1.15E+07 | 1.14 |
| 1    | 1.27E+07 | 1.16E+07 | 1.09 |
| 0.94 | 1.67E+07 | 1.56E+07 | 1.07 |
| 0.96 | 2.40E+07 | 2.02E+07 | 1.19 |
| 0.97 | 3.35E+07 | 2.90E+07 | 1.16 |
| 0.98 | 5.97E+07 | 4.62E+07 | 1.29 |
| 1    | 1.30E+08 | 1.20E+08 | 1.08 |
| 0.9  | 8481264  | 8986869  | 0.94 |
| 0.94 | 3318259  | 3049131  | 1.09 |
| 0.98 | 3362238  | 3188188  | 1.05 |
| 0.98 | 3362238  | 3188188  | 1.05 |
| 0.99 | 2779329  | 2192755  | 1.27 |
| 0.97 | 5072565  | 6415854  | 0.79 |
| 0.99 | 6920448  | 6089003  | 1.14 |
| 0.8  | 437150   | 257485   | 1.70 |
| 0.75 | 2458973  | 1636359  | 1.50 |
| 0.99 | 3413279  | 2889639  | 1.18 |
| 0.98 | 3724261  | 2967169  | 1.26 |
| 0.75 | 1366261  | 3271260  | 0.42 |
| 0.96 | 4740224  | 3441229  | 1.38 |
| 0.9  | 6847138  | 4485335  | 1.53 |
| 1    | 5594525  | 4519497  | 1.24 |
| 0.99 | 5283726  | 4523568  | 1.17 |
| 0.97 | 3.95E+07 | 4.93E+07 | 0.80 |
| 0.99 | 5.69E+07 | 5.94E+07 | 0.96 |
| 0.99 | 7.67E+07 | 7.25E+07 | 1.06 |
| 1    | 1443092  | 1152562  | 1.25 |
| 0.99 | 5082320  | 5038171  | 1.01 |

|      |          |          |      |
|------|----------|----------|------|
| 0.97 | 5392428  | 4168221  | 1.29 |
| 0.98 | 5523959  | 5951674  | 0.93 |
| 0.97 | 1.18E+07 | 1.03E+07 | 1.15 |
| 0.97 | 1.18E+07 | 1.03E+07 | 1.15 |
| 0.94 | 1.55E+07 | 1.67E+07 | 0.93 |
| 0.95 | 2559229  | 1956289  | 1.31 |
| 0.77 | 2133625  | 2455680  | 0.87 |
| 0.93 | 8324410  | 6474896  | 1.29 |
| 0.97 | 7825605  | 7759412  | 1.01 |
| 0.98 | 1531941  | 1899491  | 0.81 |
| 0.79 | 8407220  | 1.37E+07 | 0.61 |
| 0.98 | 1.55E+07 | 1.38E+07 | 1.12 |
| 0.18 | 2678178  | 1.82E+07 | 0.15 |
| 0.99 | 3.96E+07 | 3.25E+07 | 1.22 |
| 0.99 | 3.96E+07 | 3.25E+07 | 1.22 |
| 1    | 8280638  | 7957227  | 1.04 |
| 1    | 9083761  | 9046048  | 1.00 |
| 0.93 | 2.72E+07 | 7.26E+07 | 0.37 |
| 0.92 | 594119   | 463926   | 1.28 |
| 0.97 | 1.36E+07 | 1.36E+07 | 1.00 |
| 0.96 | 3355760  | 3164085  | 1.06 |
| 0.98 | 2026224  | 1522253  | 1.33 |
| 0.89 | 1547850  | 1462765  | 1.06 |
| 0.89 | 2100417  | 2277857  | 0.92 |
| 0.91 | 540701   | 621684   | 0.87 |
| 0.97 | 1613446  | 1193553  | 1.35 |
| 0.97 | 3364923  | 2769984  | 1.21 |
| 0.82 | 4014580  | 3646042  | 1.10 |
| 0.99 | 2.85E+07 | 2.47E+07 | 1.15 |
| 0.99 | 2.85E+07 | 2.47E+07 | 1.15 |
| 0.93 | 910076   | 1052202  | 0.86 |
| 0.91 | 1091338  | 1349803  | 0.81 |
| 0.98 | 2.33E+07 | 2.02E+07 | 1.15 |
| 0.76 | 496644   | 4263277  | 0.12 |
| 0.93 | 832872   | 1068691  | 0.78 |
| 0.93 | 832872   | 1068691  | 0.78 |
| 0.98 | 6873101  | 6424668  | 1.07 |
| 0.98 | 3.19E+07 | 3.02E+07 | 1.06 |
| 0.96 | 1119246  | 1046110  | 1.07 |
| 0.94 | 2668948  | 2712713  | 0.98 |
| 0.93 | 3260872  | 3462949  | 0.94 |
| 0.87 | 4229607  | 3863536  | 1.09 |
| 0.99 | 4722205  | 4842135  | 0.98 |
| 0.98 | 6150071  | 6334244  | 0.97 |
| 0.98 | 6150071  | 6334244  | 0.97 |
| 0.93 | 6827860  | 6834797  | 1.00 |
| 1    | 8397695  | 7478586  | 1.12 |
| 1    | 8658455  | 8366736  | 1.03 |
| 0.89 | 1.05E+07 | 8994640  | 1.17 |
| 1    | 1.47E+07 | 1.46E+07 | 1.01 |
| 0.96 | 3.28E+07 | 2.94E+07 | 1.12 |

|      |          |          |      |
|------|----------|----------|------|
| 1    | 3.25E+07 | 3.26E+07 | 1.00 |
| 1    | 1.34E+08 | 1.13E+08 | 1.19 |
| 0.77 | 959667   | 713699   | 1.34 |
| 0.73 | 2167181  | 2059749  | 1.05 |
| 0.99 | 4669246  | 6243245  | 0.75 |
| 0.99 | 4669246  | 6243245  | 0.75 |
| 1    | 1.65E+07 | 1.06E+07 | 1.56 |
| 0.99 | 1.36E+07 | 1.27E+07 | 1.07 |
| 0.99 | 1.92E+07 | 2.37E+07 | 0.81 |
| 0.98 | 3.71E+07 | 2.48E+07 | 1.50 |
| 0.98 | 3.71E+07 | 2.48E+07 | 1.50 |
| 0.99 | 3711232  | 3670725  | 1.01 |
| 0.97 | 1924689  | 2666431  | 0.72 |
| 0.98 | 1.83E+07 | 1.67E+07 | 1.10 |
| 0.99 | 4037917  | 2793601  | 1.45 |
| 0.99 | 4877920  | 4247552  | 1.15 |
| 1    | 5800824  | 5516008  | 1.05 |
| 1    | 1.19E+07 | 8326169  | 1.43 |
| 1    | 3.71E+07 | 2.92E+07 | 1.27 |
| 1    | 3.71E+07 | 2.92E+07 | 1.27 |
| 1    | 4.02E+07 | 3.48E+07 | 1.16 |
| 1    | 4.02E+07 | 3.48E+07 | 1.16 |
| 1    | 9765980  | 8746983  | 1.12 |
| 1    | 9765980  | 8746983  | 1.12 |
| 0.84 | 7192761  | 8109670  | 0.89 |
| 0.98 | 9153158  | 5148465  | 1.78 |
| 0.98 | 1.22E+07 | 9771067  | 1.25 |
| 0.91 | 2564872  | 2182525  | 1.18 |
| 0.97 | 4807557  | 3917558  | 1.23 |
| 0.98 | 8577046  | 7606214  | 1.13 |
| 0.87 | 2.23E+07 | 2.00E+07 | 1.12 |
| 0.99 | 3.82E+07 | 3.30E+07 | 1.16 |
| 1    | 1.08E+08 | 9.70E+07 | 1.11 |
| 0.99 | 3.60E+08 | 3.11E+08 | 1.16 |
| 1    | 4.20E+08 | 3.97E+08 | 1.06 |
| 1    | 8.07E+08 | 7.76E+08 | 1.04 |
| 0.86 | 5636459  | 4334124  | 1.30 |
| 0.99 | 7200178  | 7495803  | 0.96 |
| 0.98 | 1842579  | 1970621  | 0.94 |
| 0.98 | 1842579  | 1970621  | 0.94 |
| 0.98 | 1836195  | 2084965  | 0.88 |
| 0.94 | 2554998  | 2586863  | 0.99 |
| 0.97 | 3268387  | 3002565  | 1.09 |
| 0.99 | 6932049  | 6904913  | 1.00 |
| 1    | 3.72E+08 | 3.62E+08 | 1.03 |
| 0.95 | 1170313  | 1174348  | 1.00 |
| 0.82 | 4307257  | 3168247  | 1.36 |
| 0.82 | 4307257  | 3168247  | 1.36 |
| 0.99 | 4544584  | 3852301  | 1.18 |
| 0.99 | 4544584  | 3852301  | 1.18 |
| 0.94 | 1.15E+07 | 1.08E+07 | 1.06 |

|      |          |          |      |
|------|----------|----------|------|
| 0.99 | 1.68E+07 | 1.18E+07 | 1.42 |
| 0.99 | 1.68E+07 | 1.18E+07 | 1.42 |
| 1    | 2.26E+07 | 2.08E+07 | 1.09 |
| 0.99 | 1182436  | 1131500  | 1.05 |
| 1    | 1.04E+07 | 1.06E+07 | 0.98 |
| 1    | 1.04E+07 | 1.06E+07 | 0.98 |
| 0.98 | 9500915  | 8363270  | 1.14 |
| 1    | 2.05E+07 | 1.86E+07 | 1.10 |
| 0.97 | 7410774  | 7022599  | 1.06 |
| 0.97 | 7410774  | 7022599  | 1.06 |
| 0.92 | 8695553  | 7176520  | 1.21 |
| 0.99 | 1.54E+07 | 1.42E+07 | 1.08 |
| 0.53 | 4483714  | 4311612  | 1.04 |
| 0.99 | 2.55E+07 | 2.35E+07 | 1.09 |
| 0.94 | 1108800  | 975279   | 1.14 |
| 0.98 | 2571347  | 1672037  | 1.54 |
| 0.98 | 2571347  | 1672037  | 1.54 |
| 0.97 | 3635890  | 3480731  | 1.04 |
| 0.97 | 2282866  | 2521444  | 0.91 |
| 0.95 | 4202813  | 4927820  | 0.85 |
| 0.99 | 7077688  | 6404286  | 1.11 |
| 0.91 | 6960946  | 9224726  | 0.75 |
| 0.99 | 1.66E+07 | 1.44E+07 | 1.15 |
| 1    | 1.59E+07 | 1.46E+07 | 1.09 |
| 0.99 | 2.61E+07 | 2.28E+07 | 1.14 |
| 0.99 | 3.65E+07 | 3.47E+07 | 1.05 |
| 0.99 | 4.06E+07 | 3.53E+07 | 1.15 |
| 0.99 | 4.63E+07 | 4.33E+07 | 1.07 |
| 0.98 | 4453690  | 4179369  | 1.07 |
| 0.95 | 2725485  | 2988360  | 0.91 |
| 1    | 1.39E+07 | 1.36E+07 | 1.02 |
| 0.99 | 3132477  | 2892943  | 1.08 |
| 0.99 | 2.74E+07 | 2.67E+07 | 1.03 |
| 0.89 | 2.54E+07 | 4.37E+07 | 0.58 |
| 0.94 | 567105   | 476381   | 1.19 |
| 0.94 | 567105   | 476381   | 1.19 |
| 0.99 | 2779317  | 2636652  | 1.05 |
| 0.98 | 2746404  | 2900904  | 0.95 |
| 0.86 | 5250171  | 6459897  | 0.81 |
| 1    | 1.21E+07 | 1.18E+07 | 1.03 |
| 0.76 | 2.43E+07 | 1.57E+07 | 1.55 |
| 0.77 | 295647   | 580882   | 0.51 |
| 0.93 | 1201235  | 962161   | 1.25 |
| 0.96 | 3273638  | 3010890  | 1.09 |
| 0.9  | 1.50E+07 | 1.48E+07 | 1.01 |
| 0.98 | 322768   | 2663610  | 0.12 |
| 1    | 2732665  | 2732665  | 1.00 |
| 0.96 | 518535   | 428027   | 1.21 |
| 0.94 | 4506376  | 6328192  | 0.71 |
| 0.92 | 1.22E+07 | 1.64E+07 | 0.74 |
| 1    | 6608266  | 6608266  | 1.00 |



|      |          |          |      |
|------|----------|----------|------|
| 1    | 3885821  | 2383093  | 1.63 |
| 0.93 | 1996036  | 3090875  | 0.65 |
| 0.99 | 7026345  | 5545364  | 1.27 |
| 0.98 | 8645391  | 8208631  | 1.05 |
| 0.78 | 1.47E+07 | 1.18E+07 | 1.25 |
| 0.92 | 9699225  | 1.34E+07 | 0.72 |
| 0.94 | 514491   | 732042   | 0.70 |
| 0.99 | 1539159  | 1621073  | 0.95 |
| 0.99 | 1804389  | 1634857  | 1.10 |
| 0.95 | 1971100  | 1683675  | 1.17 |
| 0.89 | 9023546  | 9498128  | 0.95 |
| 0.98 | 1297330  | 1289770  | 1.01 |
| 0.99 | 3153774  | 2760409  | 1.14 |
| 0.99 | 3153774  | 2760409  | 1.14 |
| 0.97 | 673845   | 800875   | 0.84 |
| 0.97 | 6973151  | 6404373  | 1.09 |
| 0.97 | 6973151  | 6404373  | 1.09 |
| 0.93 | 1619402  | 2153556  | 0.75 |
| 0.99 | 3265985  | 2822824  | 1.16 |
| 0.96 | 2716883  | 2854149  | 0.95 |
| 0.99 | 8541470  | 7134034  | 1.20 |
| 0.91 | 8409085  | 9402151  | 0.89 |
| 0.98 | 6640041  | 5637531  | 1.18 |
| 0.99 | 5.77E+07 | 5.12E+07 | 1.13 |
| 0.96 | 2303383  | 2122258  | 1.09 |
| 0.78 | 1.07E+07 | 4296822  | 2.49 |
| 0.95 | 2680666  | 2284746  | 1.17 |
| 0.95 | 2680666  | 2284746  | 1.17 |
| 0.99 | 3120410  | 2555543  | 1.22 |
| 0.99 | 3120410  | 2555543  | 1.22 |
| 0.99 | 3779396  | 3977728  | 0.95 |
| 1    | 3.40E+07 | 3.36E+07 | 1.01 |
| 0.85 | 3743468  | 2753759  | 1.36 |
| 0.96 | 4783772  | 4069513  | 1.18 |
| 0.89 | 3375008  | 3194416  | 1.06 |
| 0.95 | 665821   | 589126   | 1.13 |
| 1    | 6085836  | 5513193  | 1.10 |
| 0.94 | 1065651  | 1002527  | 1.06 |
| 0.99 | 3101609  | 3010957  | 1.03 |
| 1    | 3.43E+07 | 3.18E+07 | 1.08 |
| 0.9  | 3.34E+07 | 3.70E+07 | 0.90 |
| 1    | 1732947  | 1611249  | 1.08 |
| 0.98 | 2889079  | 2564372  | 1.13 |
| 0.87 | 2352887  | 3067184  | 0.77 |
| 0.99 | 3810950  | 3115853  | 1.22 |
| 0.93 | 3730808  | 3123017  | 1.19 |
| 0.95 | 3748062  | 4798296  | 0.78 |
| 0.98 | 1.27E+07 | 1.32E+07 | 0.96 |
| 1    | 2818944  | 2616844  | 1.08 |
| 0.9  | 8164977  | 9251264  | 0.88 |
| 0.9  | 8164977  | 9251264  | 0.88 |

|      |          |          |      |
|------|----------|----------|------|
| 1    | 1.98E+07 | 1.91E+07 | 1.04 |
| 0.96 | 1418041  | 1166964  | 1.22 |
| 0.95 | 2704450  | 2075877  | 1.30 |
| 0.97 | 3369342  | 2629544  | 1.28 |
| 0.97 | 3369342  | 2629544  | 1.28 |
| 0.94 | 1.25E+07 | 1.02E+07 | 1.23 |
| 0.94 | 1.25E+07 | 1.02E+07 | 1.23 |
| 0.94 | 4819892  | 4467393  | 1.08 |
| 0.99 | 1270938  | 1162027  | 1.09 |
| 0.98 | 1487750  | 1468376  | 1.01 |
| 1    | 8217159  | 7840010  | 1.05 |
| 0.99 | 7318783  | 1.11E+07 | 0.66 |
| 0.98 | 2.04E+07 | 1.96E+07 | 1.04 |
| 0.97 | 2.23E+07 | 2.43E+07 | 0.92 |
| 1    | 3.12E+07 | 3.00E+07 | 1.04 |
| 0.98 | 3.11E+07 | 3.30E+07 | 0.94 |
| 0.98 | 3.11E+07 | 3.30E+07 | 0.94 |
| 0.97 | 8.45E+07 | 8.59E+07 | 0.98 |
| 0.88 | 1952722  | 1348483  | 1.45 |
| 0.93 | 1.49E+07 | 1.35E+07 | 1.10 |
| 1    | 3.55E+07 | 3.05E+07 | 1.16 |
| 0.96 | 2.42E+07 | 3.16E+07 | 0.77 |
| 0.99 | 2307002  | 1919582  | 1.20 |
| 0.95 | 2969913  | 2282544  | 1.30 |
| 0.93 | 7185671  | 6892685  | 1.04 |
| 0.96 | 2735686  | 2327563  | 1.18 |
| 0.97 | 3284800  | 3040163  | 1.08 |
| 0.86 | 1.82E+07 | 2.39E+07 | 0.76 |
| 0.86 | 1.82E+07 | 2.39E+07 | 0.76 |
| 0.87 | 2.50E+07 | 3.07E+07 | 0.81 |
| 0.99 | 3.51E+07 | 3.62E+07 | 0.97 |
| 0.98 | 1201499  | 1410730  | 0.85 |
| 0.99 | 9000003  | 7942826  | 1.13 |
| 1    | 6246453  | 5362416  | 1.16 |
| 1    | 6246453  | 5362416  | 1.16 |
| 1    | 6246453  | 5362416  | 1.16 |
| 0.99 | 5542384  | 4796733  | 1.16 |
| 0.99 | 5542384  | 4796733  | 1.16 |
| 1    | 2.08E+07 | 1.81E+07 | 1.15 |
| 1    | 2.08E+07 | 1.81E+07 | 1.15 |
| 0.94 | 2.34E+07 | 2.53E+07 | 0.92 |
| 0.95 | 2653818  | 2302579  | 1.15 |
| 0.99 | 1943021  | 1605467  | 1.21 |
| 0.96 | 1.08E+07 | 9335810  | 1.16 |
| 0.99 | 1.35E+07 | 1.15E+07 | 1.17 |
| 0.99 | 1.35E+07 | 1.15E+07 | 1.17 |
| 0.38 | 1.16E+07 | 9291667  | 1.25 |
| 0.98 | 1.61E+07 | 1.26E+07 | 1.28 |
| 1    | 5.26E+08 | 4.97E+08 | 1.06 |
| 0.91 | 3136808  | 3322193  | 0.94 |
| 0.99 | 5878497  | 5264465  | 1.12 |

|      |          |          |      |
|------|----------|----------|------|
| 0.95 | 1024139  | 909881   | 1.13 |
| 0.97 | 1940003  | 1838306  | 1.06 |
| 0.96 | 4603475  | 4833531  | 0.95 |
| 1    | 2.29E+07 | 2.28E+07 | 1.00 |
| 1    | 2.29E+07 | 2.28E+07 | 1.00 |
| 0.95 | 1219266  | 973010   | 1.25 |
| 1    | 2.17E+07 | 1.67E+07 | 1.30 |
| 0.99 | 3755917  | 3658261  | 1.03 |
| 0.94 | 1554821  | 1484856  | 1.05 |
| 1    | 1363441  | 1363441  | 1.00 |
| 1    | 2654396  | 2654396  | 1.00 |
| 0.96 | 6460527  | 6869521  | 0.94 |
| 1    | 1.10E+07 | 1.10E+07 | 1.00 |
| 0.99 | 1.06E+07 | 1.14E+07 | 0.93 |
| 0.96 | 1.44E+07 | 1.54E+07 | 0.94 |
| 0.96 | 1.44E+07 | 1.54E+07 | 0.94 |
| 1    | 1.84E+07 | 1.84E+07 | 1.00 |
| 0.9  | 1468168  | 2490561  | 0.59 |
| 0.93 | 2829809  | 4635227  | 0.61 |
| 0.86 | 1549596  | 2216831  | 0.70 |
| 0.86 | 1549596  | 2216831  | 0.70 |
| 0.9  | 2703110  | 1233440  | 2.19 |
| 0.97 | 1.46E+07 | 1.22E+07 | 1.20 |
| 0.88 | 7479684  | 5734108  | 1.30 |
| 0.88 | 7479684  | 5734108  | 1.30 |
| 0.95 | 911946   | 884175   | 1.03 |
| 0.82 | 2235389  | 1878759  | 1.19 |
| 0.94 | 513007   | 516173   | 0.99 |
| 0.98 | 6390625  | 6147298  | 1.04 |
| 1    | 7467256  | 6884204  | 1.08 |
| 0.97 | 8995465  | 7254407  | 1.24 |
| 1    | 6.03E+07 | 5.33E+07 | 1.13 |
| 1    | 6.03E+07 | 5.33E+07 | 1.13 |
| 0.99 | 1529048  | 1370227  | 1.12 |
| 0.94 | 799629   | 574167   | 1.39 |
| 0.98 | 2154937  | 1620842  | 1.33 |
| 0.99 | 4046871  | 3591787  | 1.13 |
| 0.97 | 2359892  | 3610700  | 0.65 |
| 0.96 | 4251696  | 3839354  | 1.11 |
| 1    | 5228752  | 4542433  | 1.15 |
| 1    | 5228752  | 4542433  | 1.15 |
| 0.99 | 9741682  | 8555893  | 1.14 |
| 0.99 | 9741682  | 8555893  | 1.14 |
| 0.89 | 6271095  | 9105232  | 0.69 |
| 0.98 | 9628700  | 9451165  | 1.02 |
| 0.98 | 9628700  | 9451165  | 1.02 |
| 0.9  | 1.33E+07 | 1.11E+07 | 1.20 |
| 1    | 1.34E+07 | 1.19E+07 | 1.13 |
| 1    | 1.34E+07 | 1.19E+07 | 1.13 |
| 1    | 1.34E+07 | 1.19E+07 | 1.13 |
| 0.99 | 1.09E+07 | 1.45E+07 | 0.75 |

|      |          |          |      |
|------|----------|----------|------|
| 0.8  | 3611331  | 4050393  | 0.89 |
| 0.99 | 6247922  | 9929060  | 0.63 |
| 0.98 | 904418   | 783942   | 1.15 |
| 1    | 1239549  | 1092280  | 1.13 |
| 0.99 | 1034766  | 1116873  | 0.93 |
| 0.99 | 8170562  | 7423146  | 1.10 |
| 0.97 | 4238859  | 3349359  | 1.27 |
| 1    | 1.11E+07 | 1.02E+07 | 1.09 |
| 1    | 1.11E+07 | 1.02E+07 | 1.09 |
| 0.97 | 6.55E+07 | 1.23E+07 | 5.33 |
| 0.94 | 1.12E+07 | 7239553  | 1.55 |
| 0.99 | 2.64E+07 | 2.35E+07 | 1.12 |
| 0.99 | 6917691  | 6282915  | 1.10 |
| 0.92 | 3226833  | 1996053  | 1.62 |
| 0.92 | 3226833  | 1996053  | 1.62 |
| 0.94 | 2250595  | 2487664  | 0.90 |
| 0.97 | 3882570  | 4858727  | 0.80 |
| 0.97 | 3469593  | 4212389  | 0.82 |
| 0.94 | 1815136  | 1856563  | 0.98 |
| 0.81 | 1.30E+07 | 7091734  | 1.83 |
| 0.95 | 1220693  | 1153113  | 1.06 |
| 0.95 | 1220693  | 1153113  | 1.06 |
| 0.99 | 4314853  | 3411632  | 1.26 |
| 0.94 | 4522330  | 4247978  | 1.06 |
| 0.97 | 6008041  | 6339167  | 0.95 |
| 0.99 | 1.00E+07 | 8905423  | 1.12 |
| 0.92 | 5783603  | 1.11E+07 | 0.52 |
| 0.83 | 1.39E+07 | 1.63E+07 | 0.85 |
| 0.93 | 1.64E+07 | 2.20E+07 | 0.75 |
| 0.93 | 1.64E+07 | 2.20E+07 | 0.75 |
| 0.99 | 9713294  | 8605020  | 1.13 |
| 0.98 | 2.43E+07 | 2.31E+07 | 1.05 |
| 0.9  | 1.27E+07 | 1.84E+07 | 0.69 |
| 0.9  | 1.27E+07 | 1.84E+07 | 0.69 |
| 0.97 | 1029680  | 1071559  | 0.96 |
| 0.98 | 1.31E+07 | 1.35E+07 | 0.97 |
| 0.99 | 4696123  | 4538245  | 1.03 |
| 0.95 | 2.67E+07 | 4.30E+07 | 0.62 |
| 0.96 | 900904   | 694034   | 1.30 |
| 0.98 | 4219564  | 3388373  | 1.25 |
| 0.93 | 8574667  | 8459833  | 1.01 |
| 0.9  | 1647593  | 1414819  | 1.16 |
| 1    | 1.86E+07 | 1.70E+07 | 1.09 |
| 0.81 | 2376459  | 2453152  | 0.97 |
| 0.94 | 4616131  | 2974792  | 1.55 |
| 0.98 | 2494003  | 2179701  | 1.14 |
| 0.99 | 6650308  | 6035057  | 1.10 |
| 0.99 | 8639949  | 7261316  | 1.19 |
| 0.99 | 8639949  | 7261316  | 1.19 |
| 0.97 | 8262823  | 8102016  | 1.02 |
| 0.97 | 5307233  | 4706594  | 1.13 |

|      |          |          |      |
|------|----------|----------|------|
| 0.95 | 2521705  | 2256283  | 1.12 |
| 0.92 | 917857   | 872362   | 1.05 |
| 0.99 | 2.33E+07 | 2.01E+07 | 1.16 |
| 0.99 | 2.33E+07 | 2.01E+07 | 1.16 |
| 0.9  | 1701972  | 1413613  | 1.20 |
| 0.97 | 1671144  | 1742519  | 0.96 |
| 0.83 | 1052935  | 2598857  | 0.41 |
| 0.97 | 5695475  | 3459452  | 1.65 |
| 0.98 | 7188749  | 5196724  | 1.38 |
| 0.99 | 7421592  | 5247929  | 1.41 |
| 0.99 | 1.01E+07 | 7731594  | 1.31 |
| 0.88 | 2.16E+07 | 1.43E+07 | 1.51 |
| 0.99 | 4.64E+07 | 4.07E+07 | 1.14 |
| 0.97 | 1311297  | 918693   | 1.43 |
| 0.99 | 4.06E+07 | 3.49E+07 | 1.16 |
| 1    | 1.28E+07 | 1.17E+07 | 1.09 |
| 0.97 | 906129   | 803974   | 1.13 |
| 0.99 | 3058740  | 2801533  | 1.09 |
| 0.99 | 3058740  | 2801533  | 1.09 |
| 1    | 4310548  | 3630801  | 1.19 |
| 1    | 4310548  | 3630801  | 1.19 |
| 0.99 | 5522417  | 4969857  | 1.11 |
| 0.89 | 492556   | 426245   | 1.16 |
| 0.92 | 1142408  | 916774   | 1.25 |
| 0.79 | 2202197  | 1305392  | 1.69 |
| 0.79 | 2202197  | 1305392  | 1.69 |
| 0.99 | 1837666  | 2122185  | 0.87 |
| 0.96 | 2.99E+07 | 2.50E+07 | 1.20 |
| 0.98 | 2.87E+07 | 2.79E+07 | 1.03 |
| 0.99 | 1.10E+08 | 1.12E+08 | 0.98 |
| 0.86 | 2.76E+07 | 3590198  | 7.69 |
| 1    | 1.50E+07 | 1.18E+07 | 1.27 |
| 0.93 | 693540   | 1048449  | 0.66 |
| 0.94 | 2250595  | 2487664  | 0.90 |
| 0.98 | 2078853  | 3224028  | 0.64 |
| 0.97 | 3882570  | 4858727  | 0.80 |
| 0.98 | 6834792  | 7508415  | 0.91 |
| 0.97 | 1.12E+07 | 1.23E+07 | 0.91 |
| 0.98 | 1.06E+07 | 1.51E+07 | 0.70 |
| 0.92 | 1685278  | 1610773  | 1.05 |
| 0.94 | 4028163  | 3773231  | 1.07 |
| 0.99 | 2056494  | 1680849  | 1.22 |
| 0.88 | 1109248  | 544925   | 2.04 |
| 0.93 | 3641496  | 2864997  | 1.27 |
| 0.99 | 2.48E+07 | 3.83E+07 | 0.65 |
| 0.99 | 2.48E+07 | 3.83E+07 | 0.65 |
| 0.98 | 2679221  | 2446144  | 1.10 |
| 0.99 | 3166250  | 2910128  | 1.09 |
| 1    | 1.17E+07 | 1.10E+07 | 1.06 |
| 0.85 | 1344405  | 1267165  | 1.06 |
| 0.95 | 2120879  | 1643482  | 1.29 |

|      |          |          |      |
|------|----------|----------|------|
| 0.99 | 2.34E+07 | 2.27E+07 | 1.03 |
| 0.91 | 4490951  | 3766898  | 1.19 |
| 0.99 | 3.37E+07 | 3.06E+07 | 1.10 |
| 1    | 4.81E+07 | 4.65E+07 | 1.03 |
| 0.97 | 1.53E+08 | 1.51E+08 | 1.01 |
| 0.9  | 3831592  | 3370675  | 1.14 |
| 0.99 | 3859397  | 3572899  | 1.08 |
| 0.99 | 3602078  | 2653341  | 1.36 |
| 0.99 | 1.02E+07 | 8306526  | 1.23 |
| 0.93 | 2.46E+07 | 2.52E+07 | 0.98 |
| 0.93 | 2.46E+07 | 2.52E+07 | 0.98 |
| 1    | 3.98E+07 | 2.88E+07 | 1.38 |
| 0.93 | 1951588  | 2609154  | 0.75 |
| 0.94 | 1165954  | 940434   | 1.24 |
| 0.98 | 2268552  | 2083720  | 1.09 |
| 0.98 | 1403814  | 1201595  | 1.17 |
| 0.91 | 2299367  | 3070062  | 0.75 |
| 0.98 | 4445909  | 4417367  | 1.01 |
| 0.72 | 8129925  | 1.12E+07 | 0.73 |
| 0.99 | 1.82E+07 | 1.79E+07 | 1.02 |
| 0.99 | 3.05E+07 | 5.09E+07 | 0.60 |
| 0.98 | 1606552  | 1728858  | 0.93 |
| 0.99 | 6516297  | 6175470  | 1.06 |
| 1    | 1.33E+07 | 1.25E+07 | 1.06 |
| 0.99 | 1.58E+07 | 1.35E+07 | 1.17 |
| 0.84 | 3.93E+07 | 3.32E+07 | 1.18 |
| 0.93 | 5497563  | 6868481  | 0.80 |
| 0.99 | 8639798  | 3.24E+07 | 0.27 |
| 0.98 | 4293268  | 4501723  | 0.95 |
| 0.99 | 2959155  | 2906505  | 1.02 |
| 0.95 | 5561970  | 5756645  | 0.97 |
| 0.98 | 4971066  | 6460221  | 0.77 |
| 0.98 | 4971066  | 6460221  | 0.77 |
| 1    | 5.95E+07 | 5.02E+07 | 1.19 |
| 0.98 | 3210377  | 2783978  | 1.15 |
| 0.99 | 3055385  | 2817566  | 1.08 |
| 0.99 | 3.13E+07 | 3.24E+07 | 0.97 |
| 0.84 | 1603986  | 1642938  | 0.98 |
| 0.93 | 4345523  | 4391063  | 0.99 |
| 0.94 | 2.97E+07 | 2.59E+07 | 1.15 |
| 0.98 | 2835260  | 2566772  | 1.10 |
| 0.98 | 2835260  | 2566772  | 1.10 |
| 1    | 5.95E+07 | 5.02E+07 | 1.19 |
| 0.94 | 1741677  | 2137116  | 0.81 |
| 0.97 | 1555486  | 2218729  | 0.70 |
| 0.96 | 5318951  | 4517246  | 1.18 |
| 0.96 | 1.75E+07 | 1.43E+07 | 1.22 |
| 0.96 | 1.75E+07 | 1.43E+07 | 1.22 |
| 0.97 | 1.62E+07 | 1.59E+07 | 1.02 |
| 0.94 | 1648611  | 1033664  | 1.59 |
| 0.95 | 1706983  | 1524128  | 1.12 |

|      |          |          |       |
|------|----------|----------|-------|
| 0.97 | 4762464  | 4233767  | 1.12  |
| 0.97 | 4762464  | 4233767  | 1.12  |
| 0.97 | 6982363  | 6797198  | 1.03  |
| 0.62 | 142969   | 71076    | 2.01  |
| 0.81 | 8126870  | 5268550  | 1.54  |
| 0.27 | 6.63E+07 | 6.16E+07 | 1.08  |
| 1    | 8.89E+07 | 8.55E+07 | 1.04  |
| 0.99 | 2.70E+08 | 2.64E+08 | 1.02  |
| 0.99 | 2.70E+08 | 2.64E+08 | 1.02  |
| 0.99 | 3.80E+08 | 3.69E+08 | 1.03  |
| 0.98 | 4074346  | 3607182  | 1.13  |
| 0.92 | 1.52E+07 | 1.65E+07 | 0.92  |
| 0.97 | 5273010  | 5351583  | 0.99  |
| 0.87 | 1.17E+07 | 1.06E+07 | 1.10  |
| 0.99 | 3.17E+07 | 3954697  | 8.02  |
| 0.96 | 3188361  | 2424475  | 1.32  |
| 0.94 | 3803515  | 3359716  | 1.13  |
| 0.98 | 1.06E+07 | 8907373  | 1.19  |
| 1    | 3.56E+07 | 2.77E+07 | 1.29  |
| 0.96 | 4383444  | 5327162  | 0.82  |
| 0.96 | 4383444  | 5327162  | 0.82  |
| 1    | 6625688  | 6625688  | 1.00  |
| 0.86 | 2963988  | 2456380  | 1.21  |
| 0.9  | 3725915  | 2826252  | 1.32  |
| 0.87 | 3756941  | 3539278  | 1.06  |
| 0.91 | 1643889  | 1816190  | 0.91  |
| 0.82 | 4894289  | 5690893  | 0.86  |
| 0.97 | 7967679  | 8150935  | 0.98  |
| 0.89 | 2.21E+08 | 1.00E+07 | 22.10 |
| 0.94 | 6385607  | 6096034  | 1.05  |
| 0.87 | 1214955  | 373443   | 3.25  |
| 0.97 | 4.68E+07 | 2952421  | 15.85 |
| 0.83 | 1701706  | 1865997  | 0.91  |
| 1    | 3.98E+07 | 3.29E+07 | 1.21  |
| 0.98 | 5192122  | 5793652  | 0.90  |
| 0.97 | 9069675  | 8850156  | 1.02  |
| 0.98 | 1.93E+07 | 1.67E+07 | 1.16  |
| 0.92 | 1.15E+07 | 1.84E+07 | 0.63  |
| 0.97 | 1818181  | 1885823  | 0.96  |
| 0.83 | 6374173  | 7914339  | 0.81  |
| 0.98 | 1.08E+07 | 9961541  | 1.08  |
| 0.99 | 1.15E+07 | 1.31E+07 | 0.88  |
| 0.99 | 1.15E+07 | 1.31E+07 | 0.88  |
| 0.96 | 1.09E+07 | 8454504  | 1.29  |
| 0.9  | 1.20E+07 | 8432332  | 1.42  |
| 0.97 | 802257   | 618494   | 1.30  |
| 0.99 | 2765373  | 2547465  | 1.09  |
| 0.99 | 2765373  | 2547465  | 1.09  |
| 0.99 | 3207836  | 2601318  | 1.23  |
| 0.95 | 3445541  | 3383807  | 1.02  |
| 0.92 | 8632371  | 7677311  | 1.12  |

|      |          |          |      |
|------|----------|----------|------|
| 0.99 | 9490256  | 8498015  | 1.12 |
| 1    | 3332754  | 3012715  | 1.11 |
| 0.97 | 1.97E+07 | 7080694  | 2.78 |
| 0.95 | 4631153  | 4325495  | 1.07 |
| 0.96 | 9777948  | 8900807  | 1.10 |
| 0.98 | 4020530  | 3186198  | 1.26 |
| 0.99 | 4178227  | 4756005  | 0.88 |
| 0.93 | 1792033  | 1893830  | 0.95 |
| 0.92 | 2985087  | 2367493  | 1.26 |
| 0.98 | 4941197  | 4709245  | 1.05 |
| 1    | 8106687  | 7034377  | 1.15 |
| 0.99 | 1.33E+07 | 1.37E+07 | 0.97 |
| 1    | 2.21E+07 | 1.82E+07 | 1.21 |
| 1    | 2.21E+07 | 1.82E+07 | 1.21 |
| 1    | 3.80E+07 | 3.15E+07 | 1.21 |
| 1    | 4.42E+07 | 3.67E+07 | 1.20 |
| 1    | 4.30E+07 | 4.17E+07 | 1.03 |
| 0.99 | 4.91E+07 | 4.58E+07 | 1.07 |
| 0.99 | 5.05E+07 | 4.66E+07 | 1.08 |
| 0.95 | 758682   | 677443   | 1.12 |
| 0.95 | 5650649  | 5013856  | 1.13 |
| 0.99 | 9056014  | 7001476  | 1.29 |
| 0.98 | 9000635  | 9550918  | 0.94 |
| 0.91 | 707942   | 533065   | 1.33 |
| 0.79 | 986575   | 929346   | 1.06 |
| 0.84 | 2638779  | 2775389  | 0.95 |
| 0.97 | 1269720  | 1137229  | 1.12 |
| 0.97 | 1269720  | 1137229  | 1.12 |
| 0.96 | 1203509  | 1857918  | 0.65 |
| 0.96 | 2302305  | 2084476  | 1.10 |
| 0.99 | 4380239  | 3234760  | 1.35 |
| 0.99 | 6814892  | 5821105  | 1.17 |
| 0.99 | 1.62E+07 | 1.38E+07 | 1.17 |
| 0.97 | 4271984  | 4110261  | 1.04 |
| 0.99 | 4484284  | 4664214  | 0.96 |
| 0.99 | 4484284  | 4664214  | 0.96 |
| 0.98 | 1389052  | 1266658  | 1.10 |
| 0.98 | 1389052  | 1266658  | 1.10 |
| 0.94 | 2230354  | 1298366  | 1.72 |
| 0.94 | 2230354  | 1298366  | 1.72 |
| 0.96 | 1869776  | 1498071  | 1.25 |
| 0.98 | 7220056  | 6074666  | 1.19 |
| 0.95 | 7336377  | 6993903  | 1.05 |
| 0.98 | 9645523  | 8148039  | 1.18 |
| 0.99 | 1.40E+07 | 1.16E+07 | 1.21 |
| 0.98 | 3139703  | 3819768  | 0.82 |
| 0.99 | 7900801  | 6827155  | 1.16 |
| 1    | 1.26E+07 | 1.27E+07 | 0.99 |
| 0.98 | 5322376  | 4255456  | 1.25 |
| 0.9  | 7525449  | 5368099  | 1.40 |
| 0.96 | 7833201  | 7264542  | 1.08 |



|      |          |          |      |
|------|----------|----------|------|
| 0.9  | 7121148  | 8140599  | 0.87 |
| 0.92 | 7541594  | 8273303  | 0.91 |
| 1    | 1.69E+07 | 1.53E+07 | 1.10 |
| 1    | 1.69E+07 | 1.53E+07 | 1.10 |
| 0.99 | 1751627  | 1669466  | 1.05 |
| 0.98 | 2164887  | 2026922  | 1.07 |
| 0.98 | 1138040  | 1110556  | 1.02 |
| 0.97 | 1957299  | 1692275  | 1.16 |
| 0.99 | 2349442  | 2362877  | 0.99 |
| 0.94 | 7171738  | 5829467  | 1.23 |
| 0.99 | 5064771  | 4192384  | 1.21 |
| 0.96 | 1.51E+07 | 1.15E+07 | 1.31 |
| 0.92 | 2821856  | 2749242  | 1.03 |
| 0.97 | 2387516  | 2546581  | 0.94 |
| 0.97 | 2387516  | 2546581  | 0.94 |
| 0.98 | 6330546  | 6077629  | 1.04 |
| 0.99 | 3685580  | 3755558  | 0.98 |
| 0.99 | 3685580  | 3755558  | 0.98 |
| 0.98 | 7162340  | 4404114  | 1.63 |
| 1    | 6520558  | 5705236  | 1.14 |
| 0.98 | 7702416  | 6651365  | 1.16 |
| 0.92 | 7391219  | 1.10E+07 | 0.67 |
| 0.98 | 1.20E+07 | 1.12E+07 | 1.07 |
| 0.98 | 1.41E+07 | 1.23E+07 | 1.15 |
| 0.96 | 3138269  | 2.07E+07 | 0.15 |
| 0.11 | 1.33E+07 | 3.69E+07 | 0.36 |
| 0.97 | 2344751  | 2372560  | 0.99 |
| 0.97 | 2403327  | 2571473  | 0.93 |
| 0.89 | 3529577  | 3966645  | 0.89 |
| 0.9  | 3583540  | 5197304  | 0.69 |
| 0.99 | 9732658  | 1.08E+07 | 0.90 |
| 0.92 | 1.23E+07 | 1.18E+07 | 1.04 |
| 0.98 | 1.00E+07 | 1.21E+07 | 0.83 |
| 0.98 | 1.00E+07 | 1.21E+07 | 0.83 |
| 1    | 2.54E+07 | 2.34E+07 | 1.09 |
| 1    | 2.62E+07 | 2.45E+07 | 1.07 |
| 0.99 | 2.87E+07 | 2.88E+07 | 1.00 |
| 0.98 | 3.39E+07 | 3.24E+07 | 1.05 |
| 0.99 | 3.66E+07 | 3.25E+07 | 1.13 |
| 0.99 | 6.03E+07 | 6.41E+07 | 0.94 |
| 1    | 4.33E+07 | 3.64E+07 | 1.19 |
| 0.97 | 2455567  | 2092418  | 1.17 |
| 0.61 | 2151309  | 858768   | 2.51 |
| 0.9  | 1329122  | 2014645  | 0.66 |
| 1    | 3735824  | 3044672  | 1.23 |
| 0.98 | 6273355  | 5371682  | 1.17 |
| 0.98 | 6273355  | 5371682  | 1.17 |
| 0.99 | 1.75E+07 | 1.70E+07 | 1.03 |
| 0.99 | 1.75E+07 | 1.70E+07 | 1.03 |
| 1    | 2.20E+07 | 1.83E+07 | 1.20 |
| 0.89 | 1340433  | 1250555  | 1.07 |

|      |          |          |       |
|------|----------|----------|-------|
| 0.61 | 4361192  | 8869777  | 0.49  |
| 0.99 | 1705479  | 1316304  | 1.30  |
| 0.93 | 2224598  | 1730425  | 1.29  |
| 1    | 5669843  | 4898261  | 1.16  |
| 0.99 | 6649204  | 5829355  | 1.14  |
| 1    | 7496454  | 6153972  | 1.22  |
| 1    | 1.80E+07 | 1.51E+07 | 1.19  |
| 0.91 | 2659629  | 2629330  | 1.01  |
| 0.96 | 3439985  | 2771570  | 1.24  |
| 0.97 | 1682416  | 1163700  | 1.45  |
| 0.97 | 1682416  | 1163700  | 1.45  |
| 0.81 | 1099660  | 1250305  | 0.88  |
| 0.89 | 1889369  | 1808401  | 1.04  |
| 0.97 | 7793842  | 6841383  | 1.14  |
| 0.99 | 831808   | 738128   | 1.13  |
| 0.99 | 4318495  | 3868186  | 1.12  |
| 0.98 | 1409693  | 947967   | 1.49  |
| 0.96 | 1036174  | 1051735  | 0.99  |
| 0.93 | 3099218  | 2701571  | 1.15  |
| 0.93 | 3099218  | 2701571  | 1.15  |
| 0.99 | 1.32E+07 | 1.20E+07 | 1.10  |
| 0.99 | 3022288  | 2800325  | 1.08  |
| 0.99 | 1182935  | 1422510  | 0.83  |
| 0.99 | 8746133  | 7801193  | 1.12  |
| 0.92 | 1679607  | 1260042  | 1.33  |
| 0.99 | 4.99E+07 | 4.42E+07 | 1.13  |
| 0.96 | 1925409  | 1152535  | 1.67  |
| 0.93 | 4663714  | 4638548  | 1.01  |
| 0.93 | 4663714  | 4638548  | 1.01  |
| 0.93 | 1036252  | 1378298  | 0.75  |
| 0.92 | 2685383  | 2351693  | 1.14  |
| 0.98 | 4087040  | 3667773  | 1.11  |
| 0.97 | 1.56E+07 | 1.05E+07 | 1.49  |
| 0.99 | 1.21E+07 | 1.19E+07 | 1.02  |
| 0.99 | 2487349  | 2162623  | 1.15  |
| 0.99 | 3581365  | 3035468  | 1.18  |
| 0.99 | 4422897  | 4076308  | 1.09  |
| 0.96 | 7885900  | 6313688  | 1.25  |
| 1    | 7801698  | 6743855  | 1.16  |
| 0.96 | 981746   | 845170   | 1.16  |
| 0.98 | 1.08E+07 | 8348568  | 1.29  |
| 0.92 | 2312052  | 2085426  | 1.11  |
| 0.92 | 2312052  | 2085426  | 1.11  |
| 0.98 | 338275   | 6645974  | 0.05  |
| 0.74 | 2836022  | 3706102  | 0.77  |
| 0.99 | 7203017  | 6678177  | 1.08  |
| 0.99 | 7203017  | 6678177  | 1.08  |
| 0.99 | 9368090  | 8267468  | 1.13  |
| 0.8  | 1.08E+08 | 1683225  | 64.16 |
| 0.94 | 767047   | 553359   | 1.39  |
| 0.9  | 644295   | 560821   | 1.15  |

|      |          |          |      |
|------|----------|----------|------|
| 0.97 | 965535   | 1475287  | 0.65 |
| 0.96 | 2074338  | 1631361  | 1.27 |
| 0.98 | 2645293  | 2458786  | 1.08 |
| 0.99 | 3381222  | 3107291  | 1.09 |
| 0.98 | 4421444  | 4136078  | 1.07 |
| 0.97 | 4134834  | 4217989  | 0.98 |
| 0.99 | 5863275  | 5786041  | 1.01 |
| 1    | 7215701  | 6534418  | 1.10 |
| 0.99 | 8474710  | 6800801  | 1.25 |
| 1    | 9848174  | 9153279  | 1.08 |
| 1    | 1.49E+07 | 1.33E+07 | 1.12 |
| 1    | 1.49E+07 | 1.33E+07 | 1.12 |
| 0.98 | 3.71E+07 | 3.27E+07 | 1.13 |
| 0.22 | 1.18E+08 | 4.05E+07 | 2.91 |
| 1    | 5.71E+07 | 5.45E+07 | 1.05 |
| 0.87 | 5.07E+07 | 6.24E+07 | 0.81 |
| 1    | 1.25E+08 | 1.10E+08 | 1.14 |
| 0.99 | 2773795  | 2851900  | 0.97 |
| 0.8  | 4666293  | 4130386  | 1.13 |
| 0.95 | 1.25E+07 | 1.00E+07 | 1.25 |
| 0.89 | 1798310  | 1702425  | 1.06 |
| 0.97 | 1913059  | 1802138  | 1.06 |
| 0.98 | 2224642  | 1512813  | 1.47 |
| 0.98 | 2224642  | 1512813  | 1.47 |
| 0.96 | 1885069  | 1501556  | 1.26 |
| 0.99 | 4981897  | 5197280  | 0.96 |
| 0.94 | 2831763  | 2261299  | 1.25 |
| 0.97 | 3448892  | 3151133  | 1.09 |
| 0.98 | 4067682  | 3844578  | 1.06 |
| 0.94 | 4981564  | 4337854  | 1.15 |
| 0.98 | 3.90E+07 | 3.58E+07 | 1.09 |

Type of file: table

Label: table 2

Filename: Supplemental table 2.pdf

Supplemental Table 2. Genetic mutations in the tested cancer cell lines.

| Cell line | Mutations                       |
|-----------|---------------------------------|
| HeLa(1)   | CTNNB1                          |
| DU145(2)  | CDKN2A; RB1; STK11; TP53        |
| MCF7(2)   | CDKN2A; PIK3CA                  |
| H157(3)   | CDKN2A; KRAS; PTEN; TP53; STK11 |

In HeLa cells, the mutation in CTNNB1 (in Wnt/CTNNB1 pathway) may augment the malignant signaling of the Pten/PI3K/mTOR cascade (Lague, M.N., et al., *Carcinogenesis*, 29, 2062-2072, 2008). In Du145 and H157 cells, the mutation in TP53 may deregulate the innate negative control of mTOR activity in these cells (Feng, Z., et al., *Proc Natl Acad Sci U S A*, 102, 8204-8209, 2005). In addition, PIK3CA and Pten are direct upstream regulators of the mTOR pathway (Guertin, D.A. and Sabatini, D.M., *Cancer Cell*, 12, 9-22, 2007). The mutations in PIK3CA and Pten in MCF7 and H157 cells, respectively, could enhance the mTOR cancerous signal in these cells.

Reference:

1. Ueda M, Gemmill RM, West J, et al. Mutations of the beta- and gamma-catenin genes are uncommon in human lung, breast, kidney, cervical and ovarian carcinomas. *Br J Cancer* 2001; 85: 64-8.
2. Ikediobi ON, Davies H, Bignell G, et al. Mutation analysis of 24 known cancer genes in the NCI-60 cell line set. *Mol Cancer Ther* 2006; 5: 2606-12.
3. The COSMIC database of The Sanger Institute
